# Supplementary material for: Red Blood Cells from Individuals with Lesch–Nyhan Syndrome: Multi-Omics Insights into a Novel S162N Mutation Causing Hypoxanthine-Guanine Phosphoribosyltransferase Deficiency
Source: MDPI journal article supplement (doi:10.3390/antiox12091699), 2023-08-31
Supplement: s1 [file s1]

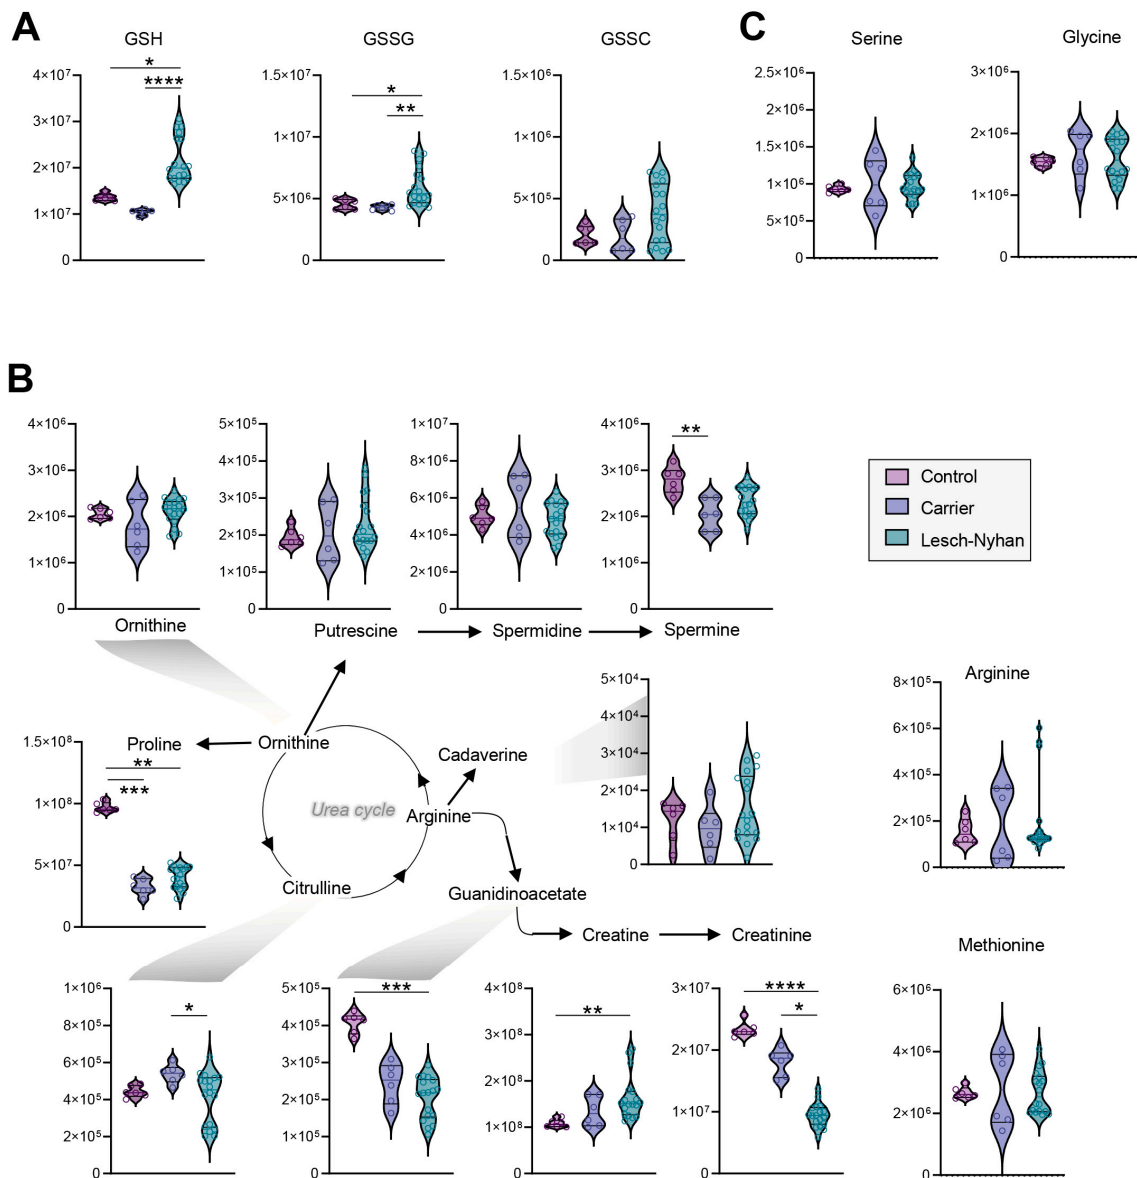

**Figure S1.** (A). Overview of transamination reactions reveals decreased amido-containing amino acids Gln and Asn in LN RBCs and increased carboxylate amino acids Glu and Asp. (B). Glutathione pool metabolites. (C). Overview of urea cycle/polyamine metabolites. (A–C) Data are peak areas (au). Statistics are one-way ANOVA with Kruskal-Wallis multiple comparisons test. \*  $p < 0.05$ , \*\*  $p < 0.01$ , \*\*\*  $p < 0.001$ , \*\*\*\*  $p < 0.0001$ .
