# Supplementary material for: Red Blood Cells from Individuals with Lesch–Nyhan Syndrome: Multi-Omics Insights into a Novel S162N Mutation Causing Hypoxanthine-Guanine Phosphoribosyltransferase Deficiency
Source: Antioxidants (Basel). 2023 Aug 31;12(9):1699. doi: 10.3390/antiox12091699 (PMC10525117; doi:10.3390/antiox12091699)
Supplement: Supplementary file 1 [file antioxidants-12-01699-s001.zip › Supplementary Table S1 - omics data.xlsx]

## Sheet: Metabolomics and oxylipins
							1	2	3	4	5	6	7	8	9	10	11	12	13	14	15	16	17	18	19	20	21	22	23	24	25	26	27	28	29	30
N.	compound	KEGG ID/HMDB ID	Pathway	m/z	r.t.	Polarity	Control	Control	Control	Control	Control	Control	Carrier	Carrier	Carrier	Carrier	Carrier	Carrier	LN	LN	LN	LN	LN	LN	LN	LN	LN	LN	LN	LN	LN	LN	LN	LN	LN	LN
1	L-alanine	C00041	Amino acids	90.0557	0.169147	+	13894010	13221890	13250110	12469270	12833040	12950670	18212480	19515010	18430110	10474820	13493100	13680470	13449910	11505620	12420560	12402900	13056920	12391500	9259377	10135180	10005940	14047740	14293740	15656600	10257410	11378010	11343040	9631185	11493580	11101470
2	L-arginine	C00062	Amino acids	175.119	0.169594	+	241656	164953	195136	121573	104290	110340	346206	300455	340342	28483.6	43747.6	71834.5	128941	82153.4	124800	119328	124758	124655	109929	141639	102402	542057	525146	603115	154491	154555	199527	121996	127289	126965
3	L-asparagine	C00152	Amino acids	131.045	0.215058	-	1816362	1644173	1492249	1720936	1731685	1524724	1782829	1745332	1767274	1408764	1360807	1433790	1332925	1369842	1251446	1196389	1456805	1357190	1375467	1392102	1293437	1884479	1770908	1697850	1311757	1145605	1014114	1165212	1075229	1058552
4	L-aspartate	C00049	Amino acids	132.029	0.209277	-	288066	302096	310197	276400	223965	265693	744772	692800	676196	227380	247634	229921	1510020	1673671	1463788	1891670	1993409	1733311	5952184	4880240	5023126	5470250	4906498	4727484	2167984	2199456	2019332	2359181	2197336	2251105
5	L-cysteine	C00097	Amino acids	122.027	0.610372	+	0	2886.71	2615.31	0	0	1738.17	0	0	0	0	0	0	6067.38	3952.27	1742.4	0	6649.97	3407.59	0	3380.61	1791.13	0	1555.9	1649.43	5047.23	10529.7	4087.34	2547.68	10521.9	7427.81
6	L-glutamate	C00025	Amino acids	146.045	0.208367	-	5693386	6044868	5534008	5509608	4497162	5182637	8224170	9145422	8940400	3689835	3723490	3967364	12872080	12941760	11763930	14365290	14110970	13532390	10110920	8294280	8928197	15329650	14273700	12845340	22877290	23426600	21659330	20398390	21522310	21023830
7	L-glutamine	C00064	Amino acids	145.061	0.215805	-	8170906	8638035	7922094	8033746	7801310	7674812	9470556	10398210	9803489	8453518	8083514	8037482	5859994	6212984	5754644	6089620	6259512	6176238	7408730	7014880	6909002	8281754	7558228	7338032	7077264	6445316	6616150	7177120	6950884	6685570
8	glycine	C00037	Amino acids	76.0401	0.176129	+	1622571	1607673	1483260	1440597	1533072	1555131	1961527	1964142	2041554	1114429	1421821	1537104	2012309	1766518	1986832	2033484	1859151	1914967	1347481	1213641	1382418	1713597	1906834	1869542	1425320	1421613	1391260	1111815	1254159	1111314
9	L-histidine	C00135	Amino acids	156.077	0.18283	+	3016783	2868453	2817454	2866019	2744968	2543957	3437370	4045619	4082798	2143139	3490395	3252713	3339880	3400271	3214001	3233809	3241908	3497921	2522659	2834781	2973037	3902821	3829503	4175876	3086733	3236546	2984165	2912111	3507237	3263592
10	L-leucine	C00123	Amino acids	132.102	0.179129	+	25434650	23687200	22137330	22809090	23405580	22511990	32671240	35225370	34095160	18146090	24633890	22705660	24596490	22147310	22585110	24969010	24239980	23038600	38051600	38117060	39225660	59023370	53983720	64545740	21202390	19440820	20933460	24593810	24617680	24713690
11	L-lysine	C00047	Amino acids	147.113	0.138661	+	4944326	5512994	5427867	5041617	4949392	4658466	6215580	6785784	7331590	3132884	3786602	4164864	4118387	4082167	4148339	4158465	4305832	4615643	4214481	4631310	5182428	6663152	6159228	7629282	4566326	5096422	5446814	3400515	4008489	4431104
12	L-methionine	C00073	Amino acids	150.059	0.171646	+	2986487	2644762	2775303	2486251	2583393	2524822	3618606	3861722	4074112	1438066	1914625	1802644	2024910	2100222	2070812	2316919	2296434	2062581	1957044	2034869	1972644	3631862	3543708	4089062	2753566	3169961	3035422	2981747	3295754	3044583
13	L-phenylalanine	C00079	Amino acids	166.086	0.346739	+	17899650	24704870	23973750	17894570	23722970	22737670	15797480	24986560	24425310	5351878	12958330	13446070	16439260	16167110	20926290	15063480	23579570	24080040	11889970	18235230	17296220	16894370	27429530	26971020	13826790	20008090	24390340	10902110	17520260	21176500
14	L-proline	C00148	Amino acids	116.071	0.164583	+	95567530	95336520	95062020	92671320	103449400	99848510	33619910	38803820	40803320	22549710	29725210	29625540	49854190	42365210	48585540	45766580	48790500	46584340	33142260	38822990	39442870	47096210	48188240	52083040	27328520	30596710	32162970	23086350	35477760	32674450
15	L-serine	C00065	Amino acids	106.05	0.171935	+	1002941	961833	903006	876301	930258	921534	1265512	1450670	1208850	568128	765908	750801	927087	927966	864738	911622	935986	990969	727358	733084	845194	1111606	1128395	1358112	1094333	1117056	1184378	720250	1025426	880172
16	L-threonine	C00188	Amino acids	120.066	0.169844	+	2312491	2008890	2169962	2023180	2173502	2288738	2578775	2811433	2724578	1332203	1731925	1904395	1794256	1770707	1977784	1623496	1788107	1677968	2280115	2391267	2588942	3440030	3379507	3686660	1732981	1964457	2199339	1735906	2131708	2103257
17	L-tryptophan	C00078	Amino acids	205.097	0.492119	+	3506978	5448356	5818248	4296584	5212594	5738124	3698979	5436334	4542548	3342369	1253712	1267876	2952756	3490877	4321886	3258563	5480102	5883858	2741564	1689112	1530867	4044457	2389048	2419214	4697208	7980208	8000534	5734884	7249468	4140279
18	L-tyrosine	C00082	Amino acids	182.081	0.169666	+	3153771	2962817	2928512	2982015	3106699	2887070	4042628	3819268	4383004	2585557	3257423	2869434	4474665	4050134	4351794	3872050	4385255	3762295	2652926	2768360	2754133	3955594	3979576	4590330	3821869	4063207	4128617	4032798	4589522	4633654
19	L-valine	C00183	Amino acids	118.087	0.167613	+	48822120	45143070	43719790	46466540	49294510	47153150	63217630	70393720	71683990	45558790	57426400	56813300	50118980	48153140	48482130	49846860	48244240	49506800	44092660	49716160	49477380	60225760	63393420	66538300	38256700	37344790	39081600	34705350	42251200	39537080
20	ADP	C00008	Nucleotides	426.023	0.210893	-	183757	233364	253070	219381	186320	236641	141919	144119	132228	339559	350645	318446	256905	378252	249621	372152	384064	309688	575112	527855	546476	583458	543566	421171	327512	363520	273153	492657	561251	462324
21	AMP	C00020	Nucleotides	346.056	0.216024	-	5392598	6147736	5983858	6231168	6333786	6088224	7104024	7724956	6521966	11005490	10745800	10525530	775957	756890	743337	951310	927825	759625	3661971	3072953	3459129	3557017	3591276	3316062	406915	416948	355847	353318	365494	386323
22	GMP	C00144	Nucleotides	362.051	0.213021	-	350089	332048	296972	256542	310358	293002	371637	447756	375880	265000	271470	298511	0	0	0	0	24041.6	0	31644	37986.2	28694.6	103761	97695.7	116935	0	0	0	0	0	0
23	Guanosine	C00387	Nucleotides	284.099	0.247194	+	6438.32	4308.28	3835.78	0	3878.57	1844.94	34845.1	22952.8	12930.3	0	3969.02	14948.4	19443.8	17296.2	5653.3	0	12093.3	6911.28	12237.8	8288.03	15780.8	31740.5	43300.9	36157.1	0	0	2576.3	0	0	0
24	Guanine	C00242	Nucleotides	152.056	0.170395	+	158662	106652	99140.2	93302.9	120245	119059	451834	414173	512124	258688	311761	289025	83082.5	81206.7	54214.5	113907	131561	59178.3	92140.7	58756.1	100540	107700	110536	158362	146017	102658	114286	112651	141025	129386
25	Cytidine	C00475	Nucleotides	242.08	0.220829	-	36288.1	29340.9	27144.3	32748.6	52713.5	30020	42235.3	65358.4	56586.9	4745.26	12965.1	10156	113155	155571	97859.1	112757	228246	160033	33250.6	37212.4	25199.7	65978	67547.2	29852.9	277304	210974	173792	146976	187640	218772
26	UDP	C00015	Nucleotides	403	0.25273	-	168304	177319	184355	96522.1	167704	166447	58718.9	68916.5	85220.9	26312.5	10311	12375	280223	305075	326757	366654	465174	447789	177943	241471	324336	171010	121408	174327	492060	697851	644193	711688	775911	1072445
27	UMP	C00105	Nucleotides	323.029	0.208565	-	78424.7	94390.5	61381.6	50564.4	70435.8	77926	26164.8	41163.9	60611.8	0	0	0	14951.8	7598.44	8675.62	22499.8	25618.3	31977.7	237164	144352	148573	406590	332725	267919	7287.33	0	0	0	0	9284.08
28	Uracil	C00106	Nucleotides	111.019	0.21662	-	276038	210944	230158	180340	228211	177474	461861	437215	447613	96966.1	154727	166892	3174221	3549295	3146752	4141091	3894062	3665576	1979310	1833846	1739528	2636527	2780865	2860774	848231	711820	818306	771547	834102	705879
29	IDP	C00104	Nucleotides	427.008	0.206972	-	595665	543623	550685	422882	504104	347765	265965	327596	321174	75363.2	133963	59585	217122	228827	221908	299010	286229	257811	232948	236559	250952	371974	261718	220631	546721	544481	431913	642272	656696	569186
30	IMP	C00130	Nucleotides	347.039	0.213226	-	10090220	10928220	10941790	10452900	9109672	9887880	6556806	7172768	6650718	6123304	6119386	6042922	7394214	8249480	6794374	9167157	9503595	8481568	11608270	9595376	9816517	8042026	7651848	6459448	11275800	10493270	10210540	8452394	9475817	8771889
31	Inosine	C00294	Nucleotides	267.073	0.217744	-	501116	493317	530974	486208	448398	444266	773353	740315	678924	455275	520109	411614	930934	993768	915063	959608	884887	995262	2340878	2072575	2405501	3458933	3372802	3060975	126089	98907.9	122499	117440	89862.4	100928
32	Hypoxanthine	C00262	Nucleotides	137.046	0.214126	+	32091400	27480700	30907740	33487490	32924690	31000400	68327710	64862750	63353760	45525410	46531040	50680190	24308000	25384700	21371470	22490330	24372530	22422780	45267910	44504120	42874520	70074620	64173460	64024850	4098568	4216334	3677555	3013812	2972699	2877076
33	Xanthine	C00385	Nucleotides	151.025	0.221783	-	22579.8	80654.8	31954.3	16868.7	61454.2	41579.7	126093	118576	125712	22726	34250.3	20101.7	10217440	10370240	10785380	11294070	12235320	11665660	8774769	8577311	9586602	8945165	8390158	8100718	194653	164610	187582	180641	218228	248172
34	Allantoate	C00499	Nucleotides	177.061	0.13787	+	147879	148063	155364	139552	142888	103016	154644	138911	127587	45468.9	59922.6	54323.9	209616	184749	224132	229510	253345	208903	146718	131657	139430	155816	129948	155445	244579	261900	269334	154466	200161	214972
35	5-Hydroxyisourate	C11821	Nucleotides	185.032	0.17578	+	1882320	1652622	1702632	1805016	1743061	1786254	2212050	2167626	2015844	1899005	2619931	2526416	1304971	1241998	1183003	1397190	1427653	1358914	1547747	1427420	1596986	1936460	1932600	2084861	1348930	1226169	1437800	1490216	1796424	1559692
36	Urate	C00366	Nucleotides	167.02	0.216144	-	6054338	6586902	5912804	6022890	5561608	5778216	7429878	7272454	7235302	6765486	5837824	6639278	2571104	2787938	2476102	2942872	2924904	3003907	1340898	1110126	1107622	1222452	1202479	1011003	21085240	18187320	19578980	25267300	25520160	24721730
37	3',5'-Cyclic AMP	C00575	Nucleotides	330.058	0.189777	+	96679.5	101789	104790	118289	94323.5	96626.8	97487.4	96442.9	69799.6	129021	149994	121512	134365	113572	131089	114620	127094	136290	108582	122015	113569	112846	119064	150295	83987.7	86549	102988	93033.9	61741.4	105483
38	3',5'-Cyclic IMP	C00943	Nucleotides	329.031	0.192961	-	8274094	8056436	7543040	6309686	6618968	6260110	4906904	4929454	5184337	1636430	1504374	1422475	11876150	11545360	11157740	13150880	12765770	11966320	11630730	11784780	11229990	8926304	8317794	7815268	16332130	15847130	15438240	20490910	20340050	20082820
39	5-6-Dihydrothymine	C00906	Nucleotides	129.066	0.161842	+	2520294	2489646	2328104	2383010	2668525	2505166	1130085	1293140	1374018	1035672	952080	1130924	1596273	1306467	1501802	1343587	1455352	1557439	862056	1033838	879575	855065	1104079	1070402	1497268	1504426	1649634	1591138	2177504	1822592
40	4-Pyridoxate	C00847	Nucleotides	182.045	0.232959	-	451693	313742	401606	340844	249241	312332	224463	297186	366646	234173	196512	199981	11045	69929.5	36276	42278.7	10027.2	50840.4	92299.3	106548	69670.1	109953	99029.4	12690.5	96036	102928	46733.7	155641	74855	26863.9
41	Nicotinamide	C00153	Nucleotides	123.056	0.176467	+	37169490	35174560	35372280	33488210	34489580	34469860	31474160	35588930	34933600	33894660	41155120	39727790	95834790	94009220	97443490	113297300	104248600	107811400	90919140	95442980	102288900	102483800	113490400	122738400	79087920	72094040	80811610	82472230	91358180	81208990
42	Nicotinate ribonucleotide	C01185	Nucleotides	337.062	0.21289	+	175084	170436	173863	125429	120298	127149	74714.2	97930.2	92360.7	0	21371.8	24390.3	520310	584506	484809	672159	592084	739045	233017	318136	314592	190626	197232	204763	936074	1032112	1049697	1032964	1543062	1481360
43	Adenylosuccinic acid	C03794	Nucleotides	464.081	0.356491	+	5634.33	6031.26	5021.54	5562.54	3974.43	3558.96	14211.9	13238	16602.7	0	3468.41	10593.5	2644.09	1629.52	1878.96	0	2739.88	0	1971.24	5274.74	0	10391.4	8629.12	8902.32	0	0	0	2103.04	0	0
44	UDP-glucose	C00029	Nucleotides	565.047	0.202173	-	299165	321989	341079	322955	288791	325370	226476	228737	224496	355302	329478	303556	504268	541515	385830	636702	548534	579773	875667	774007	771997	861935	713042	608165	865682	719266	610942	840753	833955	768441
45	ADP-D-ribose	C01882	Nucleotides	558.064	0.208312	-	0	0	0	0	0	0	0	0	0	0	0	0	391631	500811	334838	624400	791681	591538	32752.9	52747.2	25895.4	4630.23	0	5465.42	1138261	1159474	979684	1296729	1558459	1451121
46	Phosphate	C00009	Phosphates	96.968	0.218086	-	17125610	14474760	14109500	16585820	15428800	14567270	14760460	15561180	14175480	13984230	13293220	14380450	7104906	6449676	6518386	7350826	7316714	7221014	10070690	9295385	8577729	11423960	10695260	9936049	10298700	10081850	9262970	10755960	10213630	9576371
47	Diphosphate	C00013	Phosphates	176.933	0.215657	-	398822	460739	355145	448509	403129	447951	313058	414270	360287	282081	278347	324379	22978.8	0	45359.9	41748.8	83510.1	61652.7	81425.2	70195.2	82183.3	97892.3	82774.3	84710.8	153366	97034.4	102693	136871	111351	123207
48	D-Glucose	C00031	Glycolysis	179.055	0.217417	-	4446032	4290716	4103159	4163482	4038628	4260216	3378787	3429207	3450356	3299779	3450157	3422981	3749679	3632529	3578443	4112956	4117425	3864426	2709618	3064338	3095555	1458900	1532077	1398244	5808496	5864318	5121544	5275712	6059388	5353462
49	D-Glucose 6-phosphate	C02965	Glycolysis	259.022	0.209716	-	889129	994730	948574	863642	913613	956044	1054138	1159256	1011668	827680	828633	799817	762685	902779	815157	878705	789080	802452	1157217	1046381	1131676	1539365	1509347	1214404	363637	317818	298012	468097	446169	436552
50	D-Fructose 1-6-bisphosphate	C00354	Glycolysis	338.988	0.210585	-	1076423	1093295	933888	969521	906214	839725	1344991	1352845	1115380	1035682	886477	908724	242004	257308	194815	267068	365115	262987	1119015	1062375	956314	1718221	1569826	1503762	202230	164892	158604	217735	262799	178665
51	D-Glyceraldehyde 3-phosphate/Glycerone phosphate	C00118	Glycolysis	168.989	0.215807	-	2488955	3027095	2752593	2769788	2592182	2450865	3117476	3465868	3361599	3191672	3019908	3064262	935146	965356	933503	1114602	1132184	1028108	2788765	3034497	2649469	3429793	3164747	3276448	726997	841778	767508	539790	593702	604418
52	1-3-Bisphosphoglycerate	C00236	Glycolysis	264.952	0.217184	-	468902	401709	363319	404551	315956	253060	248838	217779	205633	178742	161299	144728	341711	376638	337794	632945	517148	531439	791484	747844	704764	1226715	947649	810918	616921	551517	367131	1131281	1148050	1082621
53	2/3-Phospho-D-glycerate	C00631	Glycolysis	184.985	0.212486	-	117438	95827.1	133115	78422.3	108446	84564.2	91958.5	110034	104332	59512.5	102146	120482	394284	373728	269909	377410	358581	400743	135082	159633	130899	255674	199034	186699	395725	440367	510629	669011	532985	566110
54	Phosphoenolpyruvate	C00074	Glycolysis	166.974	0.212901	-	42449	22343.2	8331.46	19076.2	19381.5	17727.4	22954.5	21054.6	0	12418	0	13818.1	66505.3	91075.9	69069.8	23228.7	38345	57433.2	76821.7	27495.1	77930.8	127982	60021.9	53322.6	66375.5	114127	70140.9	168283	136216	160026
55	Pyruvate	C00022	Glycolysis	87.0071	0.215619	-	7863546	7022904	6906874	7490182	7431526	7817740	7232912	7283012	7394180	7062710	6804486	7208648	1059656	1280387	1033367	1323194	1490276	1226678	3311084	2734197	3179365	4724542	4572402	4359202	543176	573287	495321	909876	949573	838413
56	Lactate	C01432	Glycolysis	89.0228	0.219906	-	34296690	32866540	28434230	29237060	28698260	29008120	48051040	46661860	49528060	29729690	30676960	30847750	41990840	41720750	39020770	42467480	45278840	40318730	54996260	51787920	52221710	105709600	99157860	93386270	20017980	19984180	16559740	20441570	21479030	18339050
57	Maltose	C00208	Other sugars	341.109	0.222988	-	85251.8	74032.7	101115	135735	170149	150551	137564	158562	131202	46193.1	18552.7	50532.9	93617.2	92632.8	117817	122660	151170	133545	50717.4	41143.2	56207	90936	32831	108981	59402.2	56051.2	76660.1	25040.9	80236.1	74928.2
58	Mannitol	C00392	Other sugars	181.071	0.236954	-	227933	203898	291297	229376	205030	276848	137291	135613	134325	112670	98799.6	164894	226962	243878	216948	210437	220051	281014	106463	100300	125743	97767.7	73261.1	65141.8	419182	470514	454972	465742	430055	482229
59	D-Ribose	C00121	Other sugars	149.044	0.213172	-	421523	419021	360485	431792	390554	419486	296184	293804	303872	263618	309346	277425	483836	567137	519172	541082	658593	526426	279042	243091	292042	295650	262509	220944	381035	496157	343769	540191	509174	514768
60	D-Rhamnose	C01684	Other sugars	163.06	0.230511	-	231575	303712	310926	294266	221636	251886	127701	107616	89861	88559.3	103086	145947	213143	195845	218803	178230	229538	183667	151951	131869	178860	176130	142982	104400	396239	296910	331458	433949	409800	389800
61	D-Arabitol	C01904	Other sugars	151.06	0.237431	-	29676.7	68796.9	48061.7	30515.1	62300.1	34374.7	57389.4	44206.8	45076.5	40210	46100.6	40348.9	96422	76535.5	98441.9	76872.8	52951.7	63015.1	57617.5	75586.4	105100	88081.5	97773.4	104750	56359.4	80309.5	42090.7	68600.7	113128	99823.2
62	Citrate	C00158	TCA cycle	191.019	0.217376	-	1843604	1947916	1871406	1668780	1992324	1576954	1598485	1375922	1486130	570117	598069	666501	1283863	1372128	1271006	1883741	1792474	1512499	914165	934210	1269419	1117241	1097912	863939	4593904	4247790	4081789	6208148	6307948	7119510
63	2-Oxoglutarate	C00026	TCA cycle	145.013	0.208964	-	1427026	1458515	1483642	1517961	1389500	1265187	906834	994644	952901	887226	757794	796860	234579	238008	188932	334067	335253	276201	12163.4	8392.91	4292.75	54638.6	44051.6	32634.1	1050704	1166558	1014065	1977370	1926371	1721989
64	2-Oxoglutaramate	C00940	TCA cycle	144.029	0.20399	-	21841.7	21588	20748.4	37847.2	0	19941.6	41396	0	15847.7	34339.9	18814	18880.8	30901.2	32063.4	20128.8	0	0	15619.3	14559.6	11583.5	12691.3	0	12722.2	19918.9	41315.6	40798.7	64355.9	67760.3	27831.2	58933.5
65	Succinate	C00042	TCA cycle	117.018	0.205955	-	328953	358471	296979	295391	275619	282604	332970	398611	357289	90757	113895	88585	267958	253912	258561	361214	391422	270686	142956	172682	155207	369916	308536	345089	382434	369586	323403	393875	305886	340138
66	Fumarate	C00122	TCA cycle	115.002	0.212186	-	759667	836137	804188	638598	627511	603328	1130346	924327	1088387	477266	479771	426657	597369	809565	658555	1000475	909705	879409	771096	796671	701567	1431866	1239646	1110325	777030	795685	782549	719801	695128	631263
67	Malate	C00149	TCA cycle	133.013	0.215194	-	7227782	7908194	7171208	6939958	6648098	6181470	9965848	9667259	9881425	4015363	3417406	3979171	6363192	8023828	7157978	8656413	9672466	8385764	6617984	6220436	5611346	13436620	12667260	11155360	8200760	7816744	7162418	6572718	5399534	6001042
68	2-Hydroxyglutarate/Citramalate	C02630	Alternative Carboxylic acids	147.029	0.214148	-	1262836	1256464	1311147	1224762	1053041	1173636	859937	872884	861142	626001	623536	555922	2710830	2970553	2505451	3080704	3267613	2948256	1264843	1251984	1190892	2056095	1562620	1938099	5650214	5075530	4953374	6723156	6541070	6205812
69	6-Phospho-D-gluconate	C00345	Pentose Phosphate Pathway	275.017	0.207199	-	60470.1	72068.9	61145.6	40250.7	49331.2	35175.3	20283.6	52532.2	35865.7	11071.1	31513.1	27742.2	19806.4	39549.1	30142.3	66932.2	66684.9	65202.2	60507.4	30823.9	31995.1	118106	52195.1	101733	57771.8	36718.7	48577.6	110571	103726	60337.6
70	Sedoheptulose 1-phosphate	C06222	Pentose Phosphate Pathway	289.033	0.205368	-	44115.1	32305.5	35871.4	22575.3	15263.3	32021.3	76351.4	64702.3	73285.3	76976.1	34171.8	11806.6	17743.2	34103.6	28827.3	20211	4171.6	12874.8	32958.2	40963.8	44045.6	83089	65521.3	65894.8	0	0	0	3557.97	0	13586.8
71	alpha-D-Ribose 1-phosphate	C00620	Pentose Phosphate Pathway	229.012	0.211536	-	598510	624199	615538	656587	568553	588242	1045435	1141833	1124249	1114853	1086058	1068979	665590	800856	749404	697630	733134	639402	1754308	1775997	1526373	2193573	2066371	1878511	149662	140765	138692	113771	147805	134136
72	Glutathione	C00051	GSH homeostasis	306.077	0.215186	-	13884150	13980810	12855820	15007260	12938320	13384890	9746483	10657100	9424031	11049970	10682370	10703810	28837260	30577790	26339900	27624520	28909100	26262100	20791190	16433750	18387600	20340260	20248630	17027400	19670950	18550950	17725020	16885930	17861040	17753610
73	Glutathione disulfide	C00127	GSH homeostasis	611.145	0.197379	-	5021372	4912162	4778694	4129801	4340012	4130946	4524628	4248894	4411302	4450436	4099283	3976180	4682978	4392226	4276900	5049774	5578390	5296232	5075204	4602650	4544080	5487204	5925176	5175986	8209968	6944340	6621782	8870623	8637613	7634108
74	5-Oxoproline	C01879	GSH homeostasis	128.034	0.216579	-	5281722	5566981	5389755	5212752	4994190	4867891	8013024	8380086	7797444	6001142	5214428	5881870	4850762	4833094	4672518	5108781	5335326	5003768	5251300	4895860	4684944	10131660	9680671	9167640	5154334	4536368	4437744	4359740	4521500	4622677
75	S-Glutathionyl-L-cysteine	C05526	GSH homeostasis	425.081	0.208484	-	313938	255665	258957	143431	144707	138573	356204	326994	257519	76149.5	95297.2	80711.3	319826	438507	267414	401645	537365	343250	73040.5	98925.4	81484.7	164138	159920	74474.4	689574	610140	538420	712359	716213	646414
76	Cys-Gly	C01419	GSH homeostasis	179.046	0.594173	+	6720.61	7102.2	3046.07	4315.12	5369.4	4317.11	4168.26	3586.57	7133.53	11326.9	7606.56	4953.14	4931.33	4043.03	5114.48	4038.81	6884.51	5120.93	5337.41	7100.35	3320.11	6674.19	3862.74	6857.63	8789.89	4085.14	2905.19	8802.33	3066.08	3436.82
77	Dehydroascorbate	C05422	GSH homeostasis	173.008	0.217591	-	152413	139659	129583	108464	104646	160729	85811.4	97622.1	123450	72183.3	64029.2	26556.8	128274	160177	150687	170262	146656	121420	98770.1	65749.1	79700.7	99375.5	94029.8	107326	338045	404263	317254	457249	380608	465425
78	Dimethylglycine	C01026	Serine biosynthesis and one-carbon metabolism	104.071	0.166757	+	985171	922635	947915	1023039	929037	927497	1148586	1135051	1006242	983073	1180257	934694	1025619	915234	1059352	969827	1032314	972267	1244098	1261256	1350589	1305407	1294182	1546044	1214330	1220351	1277286	1123877	1469542	1333340
79	Phosphoserine	C02532	Serine biosynthesis and one-carbon metabolism	184.001	0.231152	-	45398.8	32811.4	33134.8	41627.1	22967.8	17927.4	77776.5	72380.9	48569.3	27717.6	24930.8	36763.4	84564.8	78596.7	58772	89226.6	71845.6	110862	29854.3	64355.3	35160.8	94515.3	90298.1	84352.7	139705	138757	141226	131576	124875	85596.2
80	3-Phosphonooxypyruvate	C03232	Serine biosynthesis and one-carbon metabolism	182.967	0.301416	-	98365.4	80691.3	69853.7	105876	93408.6	60178.4	94956.5	74633.1	69419	89669	79133.5	54228	128772	117364	72936.5	138854	121769	93763.4	122120	111171	61036.1	104611	71199.8	67393.3	138408	114089	106684	163096	134830	141178
81	Ornithine	C01602	Urea cycle	133.097	0.139162	+	1938847	2173292	2199480	1981137	2091695	1963295	1796746	2335957	2453012	1238423	1378535	1661132	2156385	2201570	2306169	2180700	2297039	2392711	1622904	1723278	2110331	2222270	2060634	2410309	1955918	2372754	2557005	1570711	1893996	2052876
82	L-Citrulline	C00327	Urea cycle	176.103	0.172191	+	400339	423161	471816	484810	438219	435052	464941	505454	560195	530035	551647	612477	516584	468462	436175	420142	502553	426644	498307	530326	521658	500118	541472	628903	202824	238744	202225	252775	226051	265132
83	Cadaverine	C01672	Polyamines	103.123	0.155129	+	16427	2466.59	13564.2	15805	7866.66	15177.5	1535.51	11841.1	19532.6	5688.18	7912.56	11391.2	11861	6977.88	8943.39	8341.61	1830.38	6954.44	13776	10180.6	23297.9	25280	13373.1	26538.7	29445.7	8616.28	22301.3	5524.15	28088.2	20484.8
84	Putrescine	C00134	Polyamines	89.1081	0.153758	+	176710	167919	180581	235664	192956	208657	231784	295453	289203	132426	123767	162542	180907	184584	154194	186425	210103	191085	141852	184601	164295	193976	222561	222777	264050	278086	320275	316423	362521	380751
85	Spermidine	C00315	Polyamines	146.165	0.138947	+	4284510	4657790	4864134	5816528	5511348	4937324	6526332	7245098	7176228	3642880	3949165	4406972	5699864	4907236	4850574	4189123	4202852	4082408	3299552	3397287	3850856	5105412	3958686	5288202	5704374	5634398	6348230	4647504	5804424	5863002
86	Spermine	C00750	Polyamines	203.223	0.139833	+	2565220	2917877	2698459	3190931	2924199	2403529	2057540	2027577	2406381	2407713	1669928	1671990	2848158	2599498	2422548	1907060	2057107	1715341	2123196	2005116	2129290	2626119	2346624	2639906	2265107	2057846	2591565	2247711	2627883	2655394
87	N-Acetylneuraminate	C00270	Aminosugars	308.099	0.214421	-	127914	174886	179011	121668	103902	124916	185699	180327	148086	132678	132347	130198	112775	162922	119861	159805	141288	203427	152635	39775.8	67870	159513	108571	146497	115216	155874	102338	113198	127175	150078
88	alpha-D-Glucosamine 1-phosphate	C06156	Aminosugars	260.053	0.160958	+	320642	327946	327866	369917	438718	418283	838068	948002	1104612	712209	924097	829378	372894	322766	376060	369229	351856	374824	253861	500860	457323	612321	671761	556500	529124	512481	604247	692788	866327	776384
89	D-Glucosamine	C00329	Aminosugars	180.087	0.217751	+	134490	128169	129735	126559	118437	120544	125246	115861	112139	124714	169545	177562	120980	93617.4	70104.5	106049	125539	107072	121270	102761	100266	17758.5	24226.5	21276.1	161890	159147	121791	221011	193791	138933
90	1-4-beta-D-Xylan	C02352	Aminosugars	131.034	0.22198	-	161320	187969	161493	181598	217614	178242	157234	165181	196089	147523	137051	165521	141668	146988	187493	179564	227957	177877	126718	107735	152618	111538	102636	42120.1	248644	240110	234055	247958	267571	219708
91	UDP-N-acetyl-D-glucosamine	C00043	Aminosugars	606.075	0.203368	-	250296	260914	245624	222500	220769	211182	143560	142728	138197	118364	111825	122360	286131	365387	305779	336681	404371	351676	557877	587958	506635	783625	762644	647134	808808	729116	620867	770945	688313	724410
92	CMP-N-acetylneuraminate	C00128	Aminosugars	613.141	0.198517	-	474604	443217	387137	375337	397350	372408	399368	422946	439715	464760	419127	424366	404595	366882	373046	486917	502269	460306	405094	438812	430430	536762	492345	471616	666333	609048	558244	874907	713955	715666
93	Carnosine	C00386	Arginine and proline metabolism	227.115	0.147589	+	95421.5	100906	61460.9	121228	138329	119514	63382.5	67914.6	33814.5	88097.1	110120	77038.3	46208.7	53671.3	62554	92497	53215.6	75677	70865.8	86087.7	78693.5	113575	61553.8	110308	117586	119439	138124	134755	201047	125181
94	Phosphocreatine	C02305	Arginine and proline metabolism	212.043	0.228294	+	61840.5	35120.5	57975.3	69961.2	68397.1	58511.7	155412	152976	141221	57539	78186	75943.2	146992	145464	133886	165356	162597	137908	248035	229004	213567	552385	456820	446323	128080	104600	94060.6	101931	87200.8	97556.7
95	Creatine	C00300	Arginine and proline metabolism	132.077	0.162297	+	101721500	102332200	100436700	109242400	122862900	112094000	143450700	171304200	170639900	100054200	115472600	103991800	158454000	127890400	147381500	149134700	152336100	149217200	153546000	176729600	180324300	238673700	261590800	269486200	113367000	124905300	122457500	120136700	160509800	141577500
96	Creatinine	C00791	Arginine and proline metabolism	114.067	0.16124	+	23649490	22963930	22096520	23002700	25653710	22711060	15694880	20758110	19119460	15076330	19079400	18306010	10645580	8755911	9980868	9352384	9448864	10067330	5892944	7453522	7669152	7107296	8081860	8435848	9168185	10811620	10930820	9535800	13728720	12437980
97	N-Acetylornithine	C00437	Arginine and proline metabolism	175.107	0.167331	+	134718	81179.4	98888	128796	143618	111829	237316	249329	202766	147401	166853	180084	180963	100954	124405	111954	151779	106126	118534	145127	120944	224277	213002	201949	80432.4	71079.6	84538.7	109842	78228.1	124340
98	Guanidinoacetate	C00581	Arginine and proline metabolism	118.061	0.163549	+	414318	419064	363933	439203	421166	381963	196352	238264	266491	163245	309052	285650	218768	217736	292706	263935	251750	260826	172350	262197	223381	215358	227260	246296	105423	155894	142777	122156	156357	128097
99	trans-4-Hydroxy-L-proline	C01157	Arginine and proline metabolism	130.05	0.22177	-	196840	189705	236274	194907	193750	231047	222809	251497	257668	170864	174696	155304	231874	181670	186873	182102	177714	188066	136186	166421	157234	178450	185479	192182	373223	385198	349012	413624	386792	373497
100	Pantothenate	C00864	Panthothenate metabolism	220.118	0.376223	+	486233	614194	626049	541579	631640	683397	905655	1133213	1267435	181104	684928	783544	81061.3	107554	123239	64976.1	101684	99014.1	63515	89605.6	97354.8	50282	73832.6	64346.2	4737226	6807262	6951632	3882140	5464070	7026914
101	5-6-Dihydrouracil	C00429	Panthothenate metabolism	113.034	0.215741	-	243750	255057	203879	241167	215196	227912	298806	325552	226108	226487	191565	223032	242051	299348	225246	233701	259566	256409	293037	212077	263172	347976	334843	361777	290483	250515	215609	322023	315130	332278
102	D-4--Phosphopantothenate	C03492	Panthothenate metabolism	300.084	0.31005	+	18956.7	39069.7	31923.5	21067.9	31248.3	26308.8	28939	19229.2	21009.6	0	0	1747.53	10583.4	10165.4	18505.5	7219.52	30926.7	27451	13084.8	30264.3	24135.1	19965.2	20176.9	18154.6	15812.6	7758.79	11408.4	0	0	3976.34
103	Taurine	C00245	Sulfur metabolism	124.006	0.218829	-	12559830	12853610	11511580	13111920	12766940	11952670	25380490	28086610	25632130	3795571	3798933	3931066	13882520	14225980	13644060	15023120	15037010	14842190	11306340	10896050	10428590	26403330	25055450	24321310	20629620	18735830	18691200	8676135	8823916	8456736
104	L-Methionine S-oxide	C02989	Sulfur metabolism	166.052	0.217729	+	410621	317278	251493	347300	334550	226445	334541	349384	277712	85102.9	190272	167212	263213	244229	178327	299798	286889	196870	291618	239876	246896	451625	421441	275139	295182	273768	182207	286636	253024	227497
105	5-Hydroxyindoleacetate	C05635	Indole and Tryptophan	190.053	0.221564	-	259887	366331	318476	295131	310390	238516	395763	412358	416607	193005	185906	157184	152962	157024	100941	164248	194073	121690	169489	173948	171572	329338	295529	259878	232851	274234	198442	193615	234888	287249
106	3-Methyldioxyindole	C05834	Indole and Tryptophan	146.06	0.641588	+	382431	398705	400682	346511	407146	405882	284407	358513	324949	182484	287736	293963	509970	529626	529518	506264	643267	543738	556793	733153	719008	616923	724996	731074	322902	407292	385667	337738	446212	426833
107	Indole	C00463	Indole and Tryptophan	118.065	0.632269	+	72858.7	88108.4	98930.4	78706.7	78941.4	73341.8	96809.4	86748.4	94272.1	94120.7	114772	104783	86226.4	100027	104092	86147.5	113188	105085	100097	106732	123284	106528	112031	113676	108097	96642.6	119671	189633	196806	175482
108	Indole-3-acetaldehyde	C00637	Indole and Tryptophan	160.076	0.234464	+	103793	91867.8	104436	60010.6	82166.5	89784.6	96706.8	176030	172222	6600.61	18390	22752	21106.8	53226.2	65393.6	50110.7	91544.5	75301.7	8226.01	28241.4	22972.5	37151.5	63086.2	81445.4	68654.6	130083	138831	24518.2	21628.4	94428.5
109	Indole-3-acetate	C00954	Indole and Tryptophan	176.071	0.648993	+	31788.5	41083.8	50337.7	26545.6	35337.2	43451.5	26413.9	23267.5	30780.2	5379.69	17153.4	14717.9	33750.8	41126.1	35536.7	46763	56666.8	57039.8	27345.1	42175.8	42834.3	31026.7	43135.5	37468.5	102528	160560	184139	138638	194942	221364
110	Indoxyl	C05658	Indole and Tryptophan	134.06	0.605739	+	66183.8	52705.8	46679.2	52366.8	43085.3	46530.7	76728.3	66650.5	68659.3	45015.4	43082.3	41293.2	68846.1	62175.2	58633.7	102407	68112.6	85362.1	129885	107150	97674.7	105764	75702.8	80383.7	50863.2	41822.2	47854.7	79900.8	66221.4	61724.6
111	kynurenine	C00328	Indole and Tryptophan	209.092	0.34884	+	122008	186909	186440	143242	200467	193437	92375	132128	148135	40786.1	86491.2	93109.6	154962	132283	186106	119116	241017	217857	57898.5	84920.9	85069.4	74494.9	112511	107025	381286	571775	671189	348897	528700	646238
112	Anthranilate	C00108	Indole and Tryptophan	138.054	0.159762	+	869357	773078	750446	799771	874259	789853	274673	246501	345004	306834	268134	0	672934	550098	549792	697104	634571	721417	676547	762495	880938	829018	684184	811419	482035	487586	517458	814499	1281760	1217522
113	g-Oxalo-crotonate	C03453	Indole and Tryptophan	159.028	0.169927	+	3191814	2720398	2736702	3144262	3184403	2974475	5765092	5782498	6016076	3367493	4303186	3777932	4127036	3813665	3889766	3926583	3846143	3275316	7449134	6803824	7214570	8714263	8384450	9451715	462686	378034	467778	493762	346619	445100
114	L-Adrenaline	C00788	Signaling	184.095	0.156788	+	673833	587152	692609	541762	657532	574239	506081	609088	578900	226105	272721	269008	1193220	1051460	1001498	950349	964513	1200732	869117	775426	884144	623768	728439	667675	3678606	3037235	3912017	5341042	5372359	5058282
115	Dopamine	C03758	Signaling	154.086	0.531762	+	282563	221451	274559	257935	268528	265474	292832	289523	267578	204345	299986	269203	282557	236312	243374	313597	325549	340074	376417	355220	339483	384759	380242	387005	309152	289010	289534	260608	299948	294814
116	Serotonin	C00780	Signaling	177.102	0.248689	+	853072	791739	806134	757026	766548	802920	11358.7	82667.6	66619.8	0	18689.5	17229.1	19963.7	10905.3	14649.2	17219.6	37090.1	31577.2	18982.5	24679.2	16928.6	0	30909.4	33589.2	26628.1	47667.7	47872.1	29866.2	11062.1	32683.7
117	1D-myo-Inositol 1-4-bisphosphate	C01220	Inositol	338.988	0.210585	-	1076423	1093295	933888	969521	906214	839725	1344991	1352845	1115380	1035682	886477	908724	242004	257308	194815	267068	365115	262987	1119015	1062375	956314	1718221	1569826	1503762	202230	164892	158604	217735	262799	178665
118	Glycerol 3-phosphate	C00093	Glycerophospholipid biosynthesis	171.006	0.218136	-	364806	441599	417235	427679	481690	467669	1022240	808311	805669	797446	768044	734322	262460	290374	237423	292979	288861	219253	550408	650044	704247	1016409	1219291	1014612	59952.4	77031.4	21335.8	35207.8	27627	44176.7
119	Ethanolamine phosphate	C00346	Glycerophospholipid biosynthesis	140.011	0.219704	-	403514	333747	268600	369117	333573	304419	628893	678475	629282	46921.2	50716.8	62783.9	205096	274219	242763	279965	296439	244506	211498	197883	213072	526872	627261	600903	498399	434025	502709	206523	246094	185190
120	N-Methylethanolamine phosphate	C01210	Glycerophospholipid biosynthesis	156.042	0.156295	+	35510000	34361790	35267310	35568270	35817040	34245440	38249880	40367900	41279610	35295920	43218240	42802280	36835900	36362140	35456360	35238290	34887080	38781970	31462070	34310580	32103630	32313140	33710580	34170690	24611870	22592900	28058230	23916650	32214570	30763560
121	Sphingosine	C00319	Glycerophospholipid biosynthesis	300.289	0.729886	+	2985097	3707605	3877412	1558770	2036697	2162359	3119184	3513955	3277776	552930	737018	747697	2688273	4248487	3373491	4858472	5006796	5693772	1738868	2575108	2296779	6688112	7892502	8193154	3000696	3738125	4117995	3023720	4147558	4380501
122	Sphingosine 1-phosphate	C06124	Glycerophospholipid biosynthesis	380.255	0.734867	+	2282625	2361431	2279614	2176183	1990092	2105231	3194726	3358922	3368831	1751359	1995455	2037404	2770670	3144705	3043346	2947606	2470458	3282965	2315260	2751187	2748258	3105342	2842902	3098562	5318682	4469446	5143330	4800070	5460154	5742440
123	Acetylcholine	C01996	Glycerophospholipid biosynthesis	146.117	0.159461	+	7960326	7893012	8163074	8365734	9320621	8546843	6688196	8109660	7701102	6218690	7308032	6948800	5668764	5308476	4553722	5816284	4832892	5653912	5619822	6174514	6591602	6596556	6838288	7179628	12563320	12680150	13546120	11866450	12844150	13609860
124	Choline	C00114	Glycerophospholipid biosynthesis	104.107	0.157437	+	106983200	102800500	98924280	102489700	96860920	96248390	163764900	190455800	168603600	110459700	117371900	120555100	76308840	70975900	75698920	76066310	80341700	77819720	65079320	74492420	66107710	77560290	89153140	90194890	61683250	70723910	66181170	50409050	58893020	57421230
125	Sphinganine 1-phosphate	C01120	Sphingolipid biosynthesis	382.271	0.744932	+	667241	917818	771739	845209	746794	841655	1095722	911300	1106483	637644	734000	686515	990415	919946	955292	1030275	841668	891269	880260	914909	1037283	964932	902743	980260	1368060	1307133	1310569	1492550	1274609	1466795
126	L-Carnitine	C00318	Carnitine and fatty acid metabolism	162.113	0.1581	+	15123720	13113050	13270560	16453820	16797720	15148240	19225780	24973420	24353110	10898060	12192660	12151630	15666000	14243910	12964350	15908380	14114130	14973490	12386720	13487310	13801680	16268760	19907990	19192240	42936490	37457710	43242660	44961220	51857200	45392000
127	acetyl-carnitine (acyl-C2)	C02571	Carnitine and fatty acid metabolism	204.123	0.164089	+	15424680	14813550	14966450	17728870	18442930	16405130	23348050	28009830	29490850	14685450	16663360	14030960	21991910	20516150	20728710	22589430	21976260	20992290	14069220	15592620	15979720	26119310	26725080	27149710	39812440	37351440	39015950	39287890	44922840	41242010
128	propionyl-carnitine (acyl-C3)	C03017	Carnitine and fatty acid metabolism	218.139	0.191459	+	1492723	1536697	1442473	2140594	1879658	1740148	2677557	2915222	2976324	1332101	1653972	1444000	1201548	1192100	1088899	1248574	1122553	1063137	1780167	2019204	1911798	3515050	3698779	3995429	2561253	2394662	2459586	2831957	3509266	3085719
129	butanoyl-l-carnitine (acyl-C4)	C02862	Carnitine and fatty acid metabolism	232.154	0.396385	+	262096	372356	328827	296779	366044	362460	449412	465193	448251	59231.5	187333	210704	134587	143089	171575	162960	191548	223137	120540	218943	202993	269765	366403	276319	263721	386084	375901	211582	313799	308332
130	acyl-C4-OH (Hydroxybutyrylcarnitine) - plot alone!	HMDB13127	Carnitine and fatty acid metabolism	248.148	0.574008	+	312144	291364	270086	272072	277260	272661	2556994	2340253	2295981	1996225	2782228	2300375	574139	608420	504136	895086	606778	677812	207472	244946	226209	328497	287172	372956	2896662	2774772	2785158	4075560	5014504	4567830
131	acyl-C4-DC	HMDB13133	Carnitine and fatty acid metabolism	262.129	0.224271	+	354920	401256	303680	407668	455263	391736	518677	617914	673304	484807	604260	570268	356471	405037	417360	469119	384048	373705	305580	381513	405147	393460	406224	373009	781414	895444	814503	765674	904668	851530
132	acyl-C5:1 (Tiglylcarnitine)	HMDB02366	Carnitine and fatty acid metabolism	244.154	0.574191	+	32137	22276.6	21280.1	28770.9	27806.2	22645	43316.6	31391.4	29717.1	48714.9	54045.1	41050.5	24555.1	16131.7	17339.4	20087.7	19758.5	21163.1	30444.8	33858	35876.7	49884.6	38812.3	46440.1	25273.5	20483.9	15823.1	58043.2	56286.7	41695.2
133	acyl-C5-OH (hydroxyisovalerylcarnitine)	ac107	Carnitine and fatty acid metabolism	262.164	0.253135	+	358892	484746	484423	306872	431984	443570	236936	341880	448023	256688	243560	263220	159349	132192	176144	140626	249258	220708	289726	403314	353379	317487	456204	458080	166813	230120	243574	143019	149707	257983
134	hexanoyl-L-carnitine (acyl-C6)	HMDB00756	Carnitine and fatty acid metabolism	260.186	0.612697	+	106608	107146	133717	107868	92906.8	120814	291649	312928	289808	85844.5	107396	100888	132269	126614	141915	137721	164037	135865	81780.9	85237.9	98552.3	171006	199509	169151	343648	396338	386211	299850	410189	476196
135	acyl-C6-DC	ac109	Carnitine and fatty acid metabolism	290.16	0.493767	+	5351.13	8824.01	7983.51	2984.52	7244.55	6742.03	2979.77	2019.21	6721.1	5181.31	4379.09	5819.15	10119.9	7388.61	14549.7	4836.73	13907.5	18780.3	3633.4	3513.02	8605.29	3273.99	7304.71	3446.62	22924.5	19965.7	33056.8	20446.5	35601.2	37824.3
136	L-octanoylcarnitine (acyl-C8)	C02838	Carnitine and fatty acid metabolism	288.217	0.647606	+	85425.6	82496.2	87240.2	74541.3	83829.5	86188.1	144723	159425	168404	10631.5	42412.2	40663.3	95383.6	81891.5	72247.6	93898.6	118572	101228	44246.3	49365.6	51457.8	87890.3	85473.7	79348.8	191433	249758	225840	219897	319055	340030
137	octenoyl-l-carnitine (acyl-C8:1)	ac111	Carnitine and fatty acid metabolism	286.201	0.632348	+	301448	351910	355556	290635	327769	303874	442900	474522	528724	166480	283274	269650	358142	431038	450577	535361	589730	594349	421867	465547	468075	429192	521578	482847	1377359	1514928	1690346	1265928	2072683	2272231
138	O-Decenoyl-L-carnitine (acyl-C10:1)	CID57357170	Carnitine and fatty acid metabolism	314.232	0.666458	+	113288	128151	120209	80473.8	107477	105674	98799.3	134198	112062	19942.4	23306	33993.7	85767.5	89856.2	99180	122072	138864	137222	52511.4	76115.8	75567.9	98780.6	109876	133505	367831	437815	469635	388604	546392	702159
139	O-dodecanoyl-carnitine (acyl-C12)	HMDB02250	Carnitine and fatty acid metabolism	344.279	0.702754	+	139788	233074	245315	134780	176538	200491	205788	211934	285513	56931.3	112072	108305	118132	129288	135389	161530	182934	152740	58774.8	77039.4	81983.1	179988	179711	190569	427307	570076	568171	361193	534755	654958
140	O-dodecenoyl-carnitine (acyl-C12:1)	HMDB13326	Carnitine and fatty acid metabolism	342.264	0.692206	+	106680	102441	113861	84689.1	92087.2	79984.1	79617.1	79442	77644.9	3811.45	15855.6	21573.3	54928.5	81085.7	73510.4	96764.6	104149	92572.9	38173.1	43577.2	43381.6	84376.1	107099	111311	182494	281536	237922	177909	327322	352529
141	O-tetradecanoyl-L-carnitine (acyl-C14)	HMDB05066	Carnitine and fatty acid metabolism	372.31	0.735055	+	1893338	2413152	2290998	1691718	1910008	2220028	1902517	2088798	2079756	586107	880012	919486	1205596	1377997	1280139	1473177	1418048	1786278	971201	1416712	1585566	2245209	2286782	2500860	2528405	2686132	3196032	1798309	3387292	3612016
142	Tetradecenoyl Carnitine (acyl-C14:1)	HMDB13329	Carnitine and fatty acid metabolism	370.295	0.71709	+	303452	360192	414521	179164	250580	241476	220730	339673	286351	22793.7	62555.9	56879.4	185885	174824	149835	255841	303376	349444	119750	116704	118338	471741	480342	529310	561250	745607	729756	536549	942111	968480
143	L-Palmitoylcarnitine (acyl-C16)	C02990	Carnitine and fatty acid metabolism	400.342	0.766692	+	10370710	11574600	11069440	11243060	11615160	10754940	13948720	11833200	11313820	6515788	8995116	6510030	7960538	7838354	7770736	10772040	11008550	13454270	5172410	5712088	4946346	8379350	8803419	8067358	14602920	17692070	17469180	14306880	14349650	19763350
144	Hexadecenoyl-carnitine (acyl-C16:1)	HMDB06317	Carnitine and fatty acid metabolism	398.326	0.74518	+	1156453	1416096	1271006	1178687	1077292	1019103	1476755	1375522	1526753	394213	628682	628999	620456	684338	624229	918826	754483	945445	483012	740063	765146	1304568	1050478	1240332	1361624	1722349	1445055	1435306	1597330	1711101
145	Octadecanoyl-L-carnitine (acyl-C18)	HMDB00848	Carnitine and fatty acid metabolism	428.374	0.799054	+	4309602	4053026	3289976	2897441	3484104	4327358	3621846	3491932	3007638	2688672	2975464	1991117	1844040	2271098	1806371	3582813	2147412	4109755	1460048	1583046	1239442	2163347	2294545	2292181	4862997	3019196	3374099	4767664	3541235	3730925
146	O-octadecenoyl-L-carnitine (acyl-C18:1)	HMDB06351	Carnitine and fatty acid metabolism	426.357	0.774702	+	11458860	12365020	11042710	12634740	13259420	11502300	13888580	13344300	12476180	6445264	7505584	5551756	10418240	7503984	9073721	11476780	11610020	12791340	9917380	9652721	10268780	14115050	9433917	14049560	14793950	17776760	12528700	20016760	21887550	18855980
147	acyl-C18:2 (Linoleoyl-CoA)	HMDB01064	Carnitine and fatty acid metabolism	424.341	0.753274	+	7830684	9806219	8580936	7571324	7791982	8938949	11240970	8917803	11838160	3562107	5352724	5819502	5972042	7271216	6359060	7199816	8659857	8250258	4578236	5744592	5219220	7540326	8166884	7694156	14559110	15411140	17250830	13706340	15726290	16167540
148	acyl-C18:2-OH	ac123	Carnitine and fatty acid metabolism	440.336	0.693496	+	115580	124900	122476	120686	151564	148526	179208	212102	219723	63612.2	122572	103447	66657.4	79335	74657.1	90091.4	108376	100436	69855.6	134402	97699.1	125463	149249	167070	184906	258103	274044	171684	335854	327150
149	acyl-C20:4	ac125	Carnitine and fatty acid metabolism	448.341	0.751997	+	576552	819530	706852	741014	708573	823272	789499	557141	659444	309272	460872	444192	325539	372066	388548	403425	440992	419575	319914	304663	346970	590344	456744	565822	949805	1052039	1146825	1023634	969356	1112054
150	Octanoic acid (caprylic acid)	C06423	Saturated Fatty acids	143.107	0.557176	-	398386	391648	370911	434267	427680	395152	399669	343509	377995	397145	392485	356209	386005	336838	336829	390699	387530	359003	381147	374221	340523	388285	385859	366938	625622	557737	457448	681979	678644	679925
151	Decanoic acid (capric acid)	C01571	Saturated Fatty acids	171.138	0.59537	-	248709	224000	243729	235654	218350	251453	267816	204647	265551	235175	223583	219821	260068	208770	237491	312987	285215	257796	279444	257178	259212	253337	285703	257334	461858	408848	316137	501160	455519	528877
152	Dodecanoic acid (lauric acid)	C02679	Saturated Fatty acids	199.17	0.633976	-	128820	114694	148227	148674	175617	139925	293415	326325	323119	154947	175391	172924	161965	141388	157489	151658	165933	159379	198962	177044	185450	177606	169820	186031	425401	369473	406572	480040	508429	589177
153	Tetradecanoic acid (myristic acid)	C06424	Saturated Fatty acids	227.201	0.687179	-	628624	617136	559123	540325	479125	572816	861632	878301	649619	395208	500745	523288	582963	679387	670798	645223	789999	814348	886757	1115061	940707	869003	997054	947948	1188796	1387401	1259204	1883491	1904154	1384440
154	Hexadecanoic acid (palmitic acid)	C00249	Saturated Fatty acids	255.233	0.744115	-	15369360	14841390	13541130	14580040	15142750	14059930	17633080	16320460	17667710	13066560	12476380	12831870	17240510	16680550	15993850	19168870	18600910	17822920	16692790	18313380	18281180	16279240	16900280	17634260	17430020	19236670	18549690	27036550	25334680	25877250
155	Octadecanoic acid (stearic acid)	C01530	Saturated Fatty acids	283.264	0.815278	-	8622807	8499051	7637326	8072462	8165832	7794304	9858604	10770640	9584220	7588458	7645644	8294382	9785097	8906511	8932003	9738349	9154981	8834372	9641276	9046473	9388881	9057627	8382826	8284510	9427675	9692068	9338643	14933690	14274310	14198250
156	Tetradecenoic acid (myristoleic acid)	C08322	Monounsaturated Fatty Acids	225.185	0.651344	-	44879.6	53397.7	56984.2	47415.3	44294.1	46122	62097.7	89671.8	85218.6	39671.2	40730.9	49869.9	72086.9	67974.4	55627.3	90025.1	71025.4	81327.2	112068	98037.4	107513	95730.5	87720.8	90130.5	147296	143664	125573	185581	189668	222813
157	Octadecenoic acid (Oleic acid)	C00712	Monounsaturated Fatty Acids	281.248	0.755635	-	8444461	7906014	8122368	6872246	7020366	6596764	9009012	8874503	9315993	4071615	3651475	3541769	12757360	11725580	11024190	17801310	17111270	15587580	14485420	14166530	15048260	15348270	14373920	13023020	22302270	23864450	22490890	30218800	31485110	29341570
158	Linoleic acid ((9Z,12Z)-Octadecadienoic acid)	C01595	Poly-unsaturated Fatty Acids	279.233	0.711935	-	9132405	8940600	7912398	8555675	8348376	7749214	12021680	11926010	11526250	4106835	3972210	3937287	10719240	10738760	9085041	14715420	14299810	14559070	12559740	12174340	11416460	13765530	12458980	11111120	22424090	23856240	22856730	30597410	31433560	29561090
159	a-Linolenic acid (Octadecatrienoic acid)	C06427	Poly-unsaturated Fatty Acids	277.217	0.683945	-	385667	380348	358729	338783	300332	323565	614103	724920	615684	202558	212045	188631	685764	738822	692105	982202	1027464	1093288	1020654	1049602	1007306	983235	963647	940396	1785743	1660533	1657271	2576594	2531698	2127663
160	Arachidonic acid (Eicosatetraenoic acid)	C00219	Poly-unsaturated Fatty Acids	303.233	0.70448	-	4832586	4586722	4173921	3944965	4068015	3301125	5555922	5633468	5229620	1676680	1763665	1670027	2716228	2605996	2436926	4030161	4073115	4062506	3856208	3577649	3225079	5313690	4820646	4511078	9189693	8513043	8000326	11083410	12254880	10537450
161	Docosahexaenoic acid	C06429	Poly-unsaturated Fatty Acids	327.233	0.687726	-	941837	799060	797024	668566	685874	612215	930227	930358	864821	301070	307377	287022	866460	744390	739757	1274490	1289524	1119717	1870060	1857514	1753281	2307134	2287322	1855562	3639302	3167951	2742823	4835974	4600780	4452370
162	Eicosapentaenoic acid	C06428	Poly-unsaturated Fatty Acids	301.217	0.676614	-	596030	610103	566049	523794	413358	482362	784555	751847	763791	268366	267597	267214	532067	506053	448895	764932	735361	753773	1858233	1789722	1668495	1823384	1699015	1490869	2950253	2607858	2598523	3872825	3636879	3113281
163	Dihomo-gamma-linolenic acid ((8Z-11Z-14Z)-Icosatrienoic acid)	C03242	Essential fatty acids	305.249	0.736223	-	477975	450781	360447	356527	327447	322258	514395	522246	480980	172568	148575	135750	384955	347073	311518	574902	504389	525362	400471	356082	336707	596024	527747	508988	720128	764892	771178	1088555	1156103	995612
164	Docosapentaenoic acid ((7Z-10Z-13Z-16Z-19Z)-Docosa-7-10-13-16-19-pentaenoic acid)	C16513	Essential fatty acids	329.249	0.712741	-	409436	384978	362181	264754	280044	274403	451832	470400	462096	124692	129521	112481	293818	314840	266559	501489	461807	486282	476114	499135	482453	718175	741298	663952	943436	960106	817968	1226137	1196366	1203883
165	Biliverdin	C00500	Hemolysis markers	583.255	0.705867	+	45043	46052.5	48839.1	35272	61233.1	41727.9	41491.6	54234.4	80740.2	10805.5	30648.3	34226.6	41586.5	27765	36971.2	41998.7	45414.7	48250.5	21759.8	21277.9	34470.7	23112.3	32189.9	30128.4	162874	218310	217646	228554	272398	390463
1	15(S)-HETE	C20H32O3	oxylipin	319.227	4.364	OL-	39916.9	38326.1	39861.1	37058.8	35878.8	35817.4	49890.9	59777.3	53986.4	42730.4	52501.4	45276.6	18978.1	19024.9	19332.8	22391.1	24647.4	25056.2	35714.8	36471	34007.1	39936.3	50023.6	51050	46601.8	50101.9	50989.1	51894.4	54848.4	55222.8
2	12(S)-HETE	C20H32O3	oxylipin	319.227	4.475	OL-	341662	347778	372985	188481	214772	222425	2.06444e+06	2.45946e+06	2206813	119595	136734	120097	50275.4	51860.8	52957.6	72692.7	76831.4	74833.9	51465.2	52029.8	50606.2	326086	363855	347122	126245	137982	126845	140079	167912	155755
3	5(S)-HETE	C20H32O3	oxylipin	319.227	4.671	OL-	16729.8	15418.1	12101.3	11304.7	19715.9	16248.9	20360.3	19572	20442.3	19694.7	24507.9	19426	7710.52	8907.12	10977.3	7381.05	10085	9440.73	11206.4	15847	17452.2	18945.4	19916.1	14643.3	21489.5	14605.1	21174.6	22230.5	27643.1	26101.9
4	12(13)-DiHOME	C18H34O4	oxylipin	313.238	3.936	OL-	47760.4	45335.8	53376.2	57521.5	70709.3	61669.8	51170.1	56727.6	63682.4	45756.2	54821.4	53363.5	67038.5	62029.7	63171.4	75620.7	77172.8	75309.4	66669.1	72806.7	59928.9	67598.9	75738.4	66802.8	40739.5	49027.1	51520.8	50125.4	64623.4	57036.2
5	9(10)-DiHOME	C18H34O4	oxylipin	313.238	4.011	OL-	35523.6	43282.5	42692.4	43937.4	45272.2	48754.3	47485	52102.5	44444.9	42092.1	43726.9	44729	47438.7	49959.8	51685.4	59566	61592.7	60976.2	58946	53330.2	54794	52940.4	58456.7	58593.9	40748.7	44442.3	43297.5	46454.5	49710.6	52470.3
6	13(S)-HODE	C18H32O3	oxylipin	295.227	4.314	OL-	95268.4	102928	108326	112034	117343	129180	168032	185357	181895	189355	224827	206254	96597.1	95301.1	97376.4	120400	130676	122264	126267	152475	138272	147730	151336	162574	111715	123259	119705	114066	130392	134020
7	9(S)-HODE	C18H32O3	oxylipin	295.227	4.368	OL-	75558.4	82020.4	80103.1	118015	122652	128131	112621	114751	107644	113418	133561	123761	69677.1	72906.1	76145.6	97309.2	105443	104331	101538	115954	105160	117023	110762	119505	86933.7	91038	93236.1	100364	110845	104296
8	13-OxoODE	C18H30O3	oxylipin	293.211	4.32	OL-	23381.4	22301.2	11886.3	22835.6	15560.1	7302.7	23735.6	8982.68	18849.3	18733.2	16670.7	23206.4	18367.3	13148	7595.26	21677.6	29519.6	9914.41	25941.1	35008.8	30456.8	26260.4	29151.5	20711.5	41523.2	45712.7	41785.7	38538.1	42744.1	44825.3
9	9-OxoODE	C18H30O3	oxylipin	293.211	4.393	OL-	34025.9	31065	33564.9	33174.1	35379.7	36662.4	31412.5	35287.5	32596.6	32511.8	40240	38647.8	23174.3	24781.8	27264.3	34899.5	35080.6	34148.7	33551	41601.9	37017.8	32716.8	34964.3	35947.3	53384.8	55029.6	53005.5	57250.2	63772.6	53335.4
10	6-keto Prostaglandin F1a	C20H34O6	oxylipin	369.227	2.517	OL-	3343.66	3118.66	3281.25	3739.4	4006.04	4490.8	3175.29	4210.35	4423.17	4218.09	4468.45	4490.85	3320.12	2984.53	3256.1	3671.92	3424.88	3840.35	4488.05	4691.87	4511.47	4263.15	6025.65	6062.06	5872.41	4921.07	3784.6	7076.03	4141.42	6729.94
11	Docosahexaenoic Acid	C22H32O2	oxylipin	327.23	5.499	OL-	474993	473013	505002	319341	364177	354018	502873	617403	491494	149785	175604	162636	414475	477905	471400	571169	702402	738262	1.07099e+06	1067183	1.07786e+06	1.08075e+06	1281530	1333465	1.98521e+06	2.17869e+06	1.94785e+06	2.48044e+06	2664579	2.5898e+06
12	Eicosapentaenoic Acid	C20H30O2	oxylipin	301.214	5.278	OL-	223060	207369	245868	165247	162003	176527	254228	299291	291743	82059.8	91502.4	92817.1	151629	173819	194522	246974	286167	300875	706415	795030	717304	699023	665446	758712	891177	1.04981e+06	963743	1.34858e+06	1.24415e+06	1.41678e+06
13	Arachidonic Acid	C20H32O2	oxylipin	303.232	5.602	OL-	1114204	1.02374e+06	1.00536e+06	825397	761947	798862	1.18025e+06	1.32387e+06	1.2031e+06	334085	363441	385047	537798	565494	604194	836276	767434	806626	768518	873218	829938	942901	1.06456e+06	1.18239e+06	1.8891e+06	2.19873e+06	2.05663e+06	2.10564e+06	2.61588e+06	2860127
14	Cholic acid	C24H40O5	oxylipin	407.279	3.693	OL-	68391.1	68863.8	74327.8	48689.3	62162.9	60792	47623.9	50454.8	45302.9	20970.8	25820.4	25565.7	30964.6	32240	32848.8	47600.8	46506.2	45152.6	68966	78992.9	68494.2	65186.9	61660.5	66914.4	117548	122627	115283	166106	169065	165210
15	Prostaglandin E2	C20H32O5	oxylipin	351.217	2.992	OL-	3841.43	5119.73	4195.39	4436.03	5185	5667.05	4405.27	6147.81	4585.47	5166.37	6238.9	5719.79	3368.92	3013.51	2227	2778.1	4948.04	5337.84	16851.9	6791.79	7461.9	6592.46	8520.9	7975.88	7602.36	7051.83	6788.23	6647.42	8348.65	8660.02
16	Prostaglandin D2	C20H32O5	oxylipin	351.216	3.067	OL-	3814.41	4293.4	3963.74	4613.63	4206.57	5548.33	4160.49	4620.43	4707.04	5625.3	7014.59	6150.88	2639.17	2815.4	2590.37	2980.34	3778.49	4211.02	8506.08	6755.38	6109.99	7298.78	7061.72	6812	7809.21	6033.18	6077.83	6900.31	7581.33	7096.37
17	Glycodeoxycholic acid	C26H43NO5	oxylipin	448.305	3.813	OL-	145627	142005	147560	108381	117590	109688	528970	512653	523264	199562	208634	205868	308105	274895	271347	457884	447496	473858	392522	429664	414448	315810	317068	316570	107922	91086.7	76147	158662	102115	131586
18	Glycochenodeoxycholic acid	C26H43NO5	oxylipin	448.305	2.998	OL-	31578	27223.1	31990.4	20910.4	23298.6	23384	86450.8	98679.7	93312.2	33673.4	36753.9	38287	182973	182241	184802	256407	272876	275022	415748	428758	432128	317915	329447	318827	72622.1	75738.8	73414.3	96150.4	123151	100589
19	Glycoursodeoxycholic acid	C26H43NO5	oxylipin	448.305	2.998	OL-	31578	27223.1	31990.4	20910.4	23298.6	23384	86450.8	98679.7	93312.2	33673.4	36753.9	38287	182973	182241	184802	256407	272876	275022	415748	428758	432128	317915	329447	318827	72622.1	75738.8	73414.3	96150.4	123151	100589
20	Taurochenodeoxycholic acid	C26H45NO6S	oxylipin	498.289	3	OL-	25708	26937.5	29446.7	23394.9	25048.7	24657.2	83950.1	81276.8	82622.1	34167.7	36210.5	35965.4	198315	204665	190533	300776	306717	318619	76983	80800.4	81415	63768.1	70247.3	73411.4	4201224	4481452	4.30226e+06	6.21548e+06	6.99263e+06	6.60404e+06
21	Taurodeoxycholic acid	C26H45NO6S	oxylipin	498.288	3.167	OL-	9144.92	9364.86	7571.92	5780.91	7451.69	7696.55	55675.1	55080	58446	23931.5	21889.7	21044.7	30620.3	28760.7	29466.2	41627	40034.6	47738.6	27227.4	28272.6	26162.7	21126.6	22034.8	18778.3	41358.2	35086.4	35597.1	53161.7	49687	55952
22	Tauroursodeoxycholic acid	C26H45NO6S	oxylipin	498.289	2.474	OL-	0	0	0	0	0	0	4830.07	3208.6	3829.72	0	1396.08	1260.94	6085.78	6554.68	6966.42	10902.3	11256.2	10068	7752.15	8478.16	8185.45	7941.19	8203.84	7198.34	41281.7	46347.8	43593.6	61834.3	64272.2	61587.3
23	a-Linolenic Acid	C18H30O2	oxylipin	277.216	5.328	OL-	13732.6	17190.4	16386.2	12067.3	11813.6	13190.2	34290	34316.9	29656.5	6402.17	9438.08	8615.99	28408.1	41253	37682.6	50726.7	54197.7	60939.8	63684.2	70187.3	75708.7	56822.8	54416.8	63129.5	86951.5	93182.9	82450	130609	118147	131104
24	Oleic Acid	C18H34O2	oxylipin	281.248	5.811	OL-	11571.4	12230	9278.1	13208.6	9655.36	9194.59	13506.9	13641.1	13484.1	6341.7	9699.02	7633.52	19227	18767.7	14245.3	14693.7	21730.2	20069.8	16352	23547	18938.7	18710.1	19269	16519.1	37094.6	27730.3	32392.3	33095.5	46832.3	41473
25	Leukotriene B4	C20H32O4	oxylipin	335.222	3.916	OL-	8318.09	8099.98	8833.89	9927.79	10660.4	9678.33	10378.3	13958.4	12171.8	11371.2	11761.3	12889.2	4623.13	5030.6	5960.95	6081.66	7022.79	7999.59	43274.4	9790.98	10050.4	10005.8	8367.36	10133.5	11091.9	11935	12213	11875	12496.7	11978.3
26	Linoleic Acid	C18H32O2	oxylipin	279.232	5.658	OL-	224059	251721	238424	213754	182470	264291	339148	357395	320121	113347	104021	109815	285706	279336	301875	370542	406949	423586	340708	354998	327566	315587	372861	365611	740170	728263	765756	780185	980013	879362
27	17(S)-HDHA	C22H32O3	oxylipin	343.226	4.409	OL-	90596.1	88653.8	91020.8	51841.3	59992.1	55882.3	455293	499057	475921	25831.6	28896	29936.5	22900.7	24075.1	27279.2	34787.5	38668.5	36966.3	29724.1	35677.4	31077.4	161883	166283	184865	71817.4	80029.4	84196.8	83722.2	99992.4	94801.1

## Sheet: Lipidomics
						1	2	3	4	5	6	7	8	9	10	11	12	13	14	15	16	17	18	19	20	21	22	23	24	25	26	27	28	29	30
N.	compound	Formula	m/z	r.t.	Polarity	Control	Control	Control	Control	Control	Control	Carrier	Carrier	Carrier	Carrier	Carrier	Carrier	LN	LN	LN	LN	LN	LN	LN	LN	LN	LN	LN	LN	LN	LN	LN	LN	LN	LN
1	TG(44:7)	C47H76O6	736.567	2.66	pos	1.26945e+06	1.41094e+06	1.25288e+06	917910	985512	1.18992e+06	1.30677e+06	1.45492e+06	1.51231e+06	1.9373e+06	1.87057e+06	1.92234e+06	1.55383e+06	2.15279e+06	1.66213e+06	1.20075e+06	1.17939e+06	1.39193e+06	1.5976e+06	1.91206e+06	1.71452e+06	1.94484e+06	2.09305e+06	2.4754e+06	1.10785e+06	982459	1.14481e+06	982327	968750	1.07948e+06
2	TG(18:2_17:1_18:2)	C56H98O6	866.731	3.299	pos	3.28571e+06	3.85896e+06	5.02816e+06	3.46275e+06	3.52894e+06	3.36342e+06	3.43298e+06	2.91632e+06	2.13804e+06	2.4859e+06	4.11547e+06	2.41746e+06	1.34142e+06	1.67742e+06	1.75623e+06	1.41035e+06	1.63344e+06	1.3396e+06	3.04781e+06	3.30805e+06	2.09549e+06	2.57088e+06	3.45804e+06	2.99976e+06	2.87289e+06	2.63006e+06	2.54552e+06	1.91067e+06	2.40575e+06	2.03959e+06
3	TG(18:1_17:1_18:2)	C56H100O6	868.748	3.386	pos	654386	673173	328729	282899	268649	272920	342010	255678	258647	279618	244335	416648	104553	171483	180117	106030	97055.9	101343	481760	173510	137860	196840	206475	522095	167016	148177	199547	137516	142846	173691
4	TG(16:0_18:2_18:2)	C55H98O6	854.739	3.652	pos	260698	1.67202e+06	1.88111e+06	1.20757e+06	1.30174e+06	941761	1.12093e+06	2.5067e+06	2.37826e+06	1.2793e+06	1.01814e+06	1.23633e+06	593384	3.62245e+06	3.54247e+06	624416	4.49555e+06	4.71295e+06	2.49181e+06	2.53604e+06	2.8462e+06	2.2671e+06	1.91588e+06	2.51946e+06	4.92637e+06	3.47248e+06	1.50978e+06	4.38351e+06	5.24989e+06	4.70293e+06
5	ST(t16:0_24:6)	C46H79NO12S	869.534	2.272	pos	366205	392076	400843	381624	366030	389066	334102	336155	374224	726156	628785	676499	338279	417343	362964	228136	231721	215587	502956	514981	478528	490765	533762	545900	308427	323190	303220	169314	204521	223694
6	ST(d34:1+O)	C40H77NO12S	795.51	2.449	pos	938977	1.23231e+06	923534	1.50949e+06	990225	1.07627e+06	1.19539e+06	1.22594e+06	1.49234e+06	1.98014e+06	2.01747e+06	1.49463e+06	1.10202e+06	1.56032e+06	1.4583e+06	1.02319e+06	1.2893e+06	1.41325e+06	1.43321e+06	2.84432e+06	2.07882e+06	2.21882e+06	1.50628e+06	2.86268e+06	1.7687e+06	1.22082e+06	846029	1.03873e+06	2.51363e+07	827416
7	ST(d34:1)	C40H77NO11S	779.514	2.54	pos	750419	1.13092e+06	1.09692e+06	864054	1.78165e+06	1.19052e+06	1.56813e+06	1.36726e+06	1.03367e+06	1.7171e+06	2.01853e+06	2.24645e+06	1.73708e+06	1.2408e+06	1.35928e+06	1.03996e+06	873714	919900	1.55112e+06	1.65587e+06	1.80304e+06	2.46512e+06	2.05027e+06	1.74344e+06	1.31289e+06	1.34807e+06	1.04717e+06	950963	1.04084e+06	835899
8	ST(d16:1_24:6)	C46H77NO11S	851.53	2.433	pos	658303	565421	626395	728216	816950	546453	842964	824017	667802	1.0086e+06	967570	1.06525e+06	472211	753166	756410	641382	620600	675287	1.04343e+06	1.14992e+06	1.09917e+06	1.14228e+06	1.35337e+06	1.3572e+06	710032	786408	882184	745841	574245	572470
9	SPHP(t18:0)	C18H40NO6P	397.259	1.34	pos	58734.8	57403.9	82988.9	69974.2	78472.3	53876	82067.3	72759.7	84280.1	19282.4	33179.8	26545.5	53514.5	50506.5	50701.3	97221.1	111204	131587	30542.4	49104.7	54851.8	94369.1	138427	112901	120548	94296.3	108301	105062	75133.8	107901
10	SPHP(d19:1)	C19H40NO5P	393.264	1.516	pos	396277	424570	398589	454634	408800	432932	477709	612443	504422	602933	675764	656128	360539	377021	371100	351924	391183	316460	553283	550031	638964	716182	761650	641317	1.09579e+06	1.15762e+06	1.13036e+06	1.02256e+06	964060	850665
11	SPHP(d18:2)	C18H36NO5P	377.233	1.038	pos	629714	660113	725945	582970	632250	551094	944744	847376	908069	919604	924578	1.01565e+06	537689	412844	536067	622945	718119	590453	444568	565382	542026	463668	723452	731266	1.81582e+06	1.68325e+06	1.63269e+06	1.62081e+06	1.59314e+06	1.59419e+06
12	SPH(d19:1)	C19H39NO2	313.298	1.706	pos	228068	304127	263661	445525	446758	484555	827275	838926	840215	149419	210025	263916	455496	434766	504701	1.30526e+06	1.35022e+06	1.36027e+06	353590	429889	372284	1.59563e+06	1.76152e+06	1.63475e+06	549591	608404	566331	469655	465912	431923
13	SPH(d18:2)	C18H35NO2	297.267	1.301	pos	1.69085e+06	1.79607e+06	1.60156e+06	2.37758e+06	2.56119e+06	2.43207e+06	3.87103e+06	4.00427e+06	3.83111e+06	1.56385e+06	1.59391e+06	1.30367e+06	1.32253e+06	1.28769e+06	1.36911e+06	3.20716e+06	3.03055e+06	3.1664e+06	1.01639e+06	787081	765794	3.46042e+06	3.65964e+06	3.3145e+06	3.41406e+06	3.18424e+06	3.35858e+06	2.90236e+06	2.95024e+06	2.7587e+06
14	SPH(d18:0)	C18H39NO2	301.297	1.655	pos	2.74621e+06	2.97224e+06	2.93274e+06	3.91442e+06	4.14618e+06	4.16519e+06	6.17591e+06	5.90796e+06	5.98447e+06	1.94809e+06	1.76662e+06	1.90374e+06	3.75414e+06	3.77649e+06	4.05918e+06	1.32087e+07	1.09235e+07	1.18467e+07	2.3783e+06	2.47816e+06	2.3723e+06	1.1282e+07	1.15652e+07	1.05496e+07	4.46073e+06	4.57008e+06	3.96345e+06	3.77128e+06	3.519e+06	3.60528e+06
15	SPH(d17:1)	C17H35NO2	285.265	3.62	pos	16604.6	8920.59	24715.4	24699.1	8708.84	25471.6	16162.8	12528.7	17050.7	19111	10298.3	9178.63	14607.6	15175.7	15070.8	154813	31281.8	20402.3	18305.3	14574.1	14445.3	26029.2	13174.1	11024.2	29201.6	22667	28634.9	28899.7	30984.5	30653.3
16	SPH(d16:1)	C16H33NO2	271.251	1.166	pos	714998	762283	797778	932536	971699	1.0604e+06	2.1649e+06	2.28512e+06	2.13127e+06	1.04246e+06	939838	1.00727e+06	313556	415833	315127	980370	955718	858019	349058	368902	365347	1.64988e+06	1.68382e+06	1.61393e+06	1.14078e+06	1.24834e+06	1.36717e+06	971981	999452	1.01141e+06
17	SM(t42:3)	C47H91N2O7P	826.659	3.07	pos	1.55821e+06	3.11383e+06	3.65912e+06	2.11208e+06	866749	1.43149e+06	3.47689e+06	1.87785e+06	2.3013e+06	4.02046e+06	4.01989e+06	4.98028e+06	4.2811e+06	4.09118e+06	4.15821e+06	1.89149e+06	2.30584e+06	1.92819e+06	5.90708e+06	5.04617e+06	6.43318e+06	3.26201e+06	2.66614e+06	3.15452e+06	3.53654e+06	4.36128e+06	3.04812e+06	2.64561e+06	1.52999e+06	4.70959e+06
18	SM(t42:2)	C47H93N2O7P	828.679	3.071	pos	2.92282e+06	1.7044e+06	2.92911e+06	4.95317e+06	2.66637e+06	1.7895e+06	2.31508e+06	1.98399e+06	2.61107e+06	6.23792e+06	2.82046e+06	2.32934e+06	7.20483e+06	1.50355e+06	3.15749e+06	4.42516e+06	1.07435e+07	4.22e+06	2.28451e+06	5.1481e+06	1.46949e+06	2.69078e+06	5.67608e+06	2.48639e+06	5.18277e+06	2.70034e+06	6.05896e+06	2.66838e+06	2.49799e+06	4.68975e+06
19	SM(t40:1)	C45H91N2O7P	802.654	2.707	pos	553249	651718	744939	835797	719571	820266	699116	832812	829257	857053	654934	721968	814103	758430	720200	885215	1.05384e+06	760754	782848	826115	926624	760918	641346	1.03288e+06	789436	585269	840499	518146	595842	639179
20	SM(t36:2)	C41H81N2O7P	744.585	3.043	pos	5.84141e+07	5.09121e+07	7.95571e+07	6.00584e+07	5.9656e+07	3.9526e+07	3.21104e+07	4.196e+07	4.31317e+07	4.08867e+07	4.11573e+07	4.83506e+07	2.80723e+07	1.75451e+07	2.89588e+07	2.25963e+07	2.94796e+07	2.63746e+07	2.4299e+07	2.46082e+07	2.31704e+07	3.49656e+07	3.33257e+07	2.93987e+07	4.26949e+07	4.22939e+07	3.39061e+07	4.28154e+07	3.89843e+07	2.31912e+07
21	SM(t34:2)	C39H77N2O7P	716.545	2.651	pos	1.81938e+06	2.04558e+06	2.53169e+06	2.27231e+06	2.4627e+06	2.24392e+06	1.94214e+06	2.07124e+06	2.31417e+06	2.64035e+06	2.58262e+06	2.54257e+06	1.84772e+06	1.72615e+06	2.11916e+06	1.9879e+06	2.13968e+06	2.0253e+06	1.5216e+06	1.68121e+06	1.46518e+06	1.81652e+06	2.3722e+06	2.10895e+06	2.95328e+06	2.91048e+06	3.29816e+06	2.54433e+06	2.61717e+06	2.58921e+06
22	SM(t34:1)	C39H79N2O7P	718.561	2.779	pos	1.06581e+07	1.19886e+07	1.09544e+07	1.31004e+07	1.13786e+07	1.05452e+07	8.89314e+06	9.6665e+06	8.72335e+06	9.24032e+06	7.72043e+06	7.88855e+06	9.09921e+06	9.55076e+06	1.03677e+07	9.2444e+06	1.17237e+07	1.09294e+07	9.38964e+06	9.13612e+06	8.91528e+06	1.03977e+07	1.11895e+07	1.01233e+07	1.41525e+07	1.31765e+07	1.35831e+07	1.48004e+07	1.28652e+07	1.28493e+07
23	SM(t34:0)	C39H81N2O7P	720.576	2.761	pos	2.40449e+07	2.42091e+07	2.47888e+07	2.48473e+07	2.48031e+07	2.25139e+07	2.23998e+07	2.34577e+07	2.18099e+07	2.51363e+07	2.27946e+07	2.23087e+07	1.57599e+07	1.3794e+07	1.72353e+07	1.71535e+07	1.72064e+07	1.74317e+07	1.42103e+07	1.85834e+07	1.80469e+07	2.07971e+07	2.048e+07	1.90447e+07	2.36579e+07	1.88275e+07	2.20251e+07	1.67972e+07	1.89609e+07	2.2431e+07
24	SM(t33:2)	C38H75N2O7P	702.538	3.1	pos	3.93394e+07	3.15314e+07	3.74261e+07	3.95242e+07	3.94322e+07	4.06952e+07	3.33129e+07	3.17494e+07	3.64898e+07	3.80368e+07	3.10299e+07	4.10094e+07	2.47128e+07	2.97956e+07	3.06636e+07	3.129e+07	2.98549e+07	3.14635e+07	3.39247e+07	3.49868e+07	3.08061e+07	3.73994e+07	3.5226e+07	3.18793e+07	2.76919e+07	2.49227e+07	3.16911e+07	2.12958e+07	2.48088e+07	2.44383e+07
25	SM(t32:1)	C37H75N2O7P	690.53	2.617	pos	1.42843e+06	1.52138e+06	1.46423e+06	1.47083e+06	1.53071e+06	1.37101e+06	1.66762e+06	1.66087e+06	1.96799e+06	1.96967e+06	2.45273e+06	2.01821e+06	951730	943605	1.07116e+06	861144	949912	1.20155e+06	1.44524e+06	1.58229e+06	1.39172e+06	1.68343e+06	1.82307e+06	1.87487e+06	2.03504e+06	1.61944e+06	2.15048e+06	1.62487e+06	1.65038e+06	1.5001e+06
26	SM(d44:5)	C49H91N2O6P	834.659	4.884	pos	120905	161310	193848	117190	169954	154394	131026	175907	153534	164544	113516	187144	155685	90804.8	98560.1	85330.2	149431	105466	127101	215850	113548	179979	173342	237400	243042	173464	189744	179979	158741	183988
27	SM(d44:4)	C49H93N2O6P	836.675	3.155	pos	1.4932e+07	1.25224e+07	1.20046e+07	1.54801e+07	1.34421e+07	1.38634e+07	1.26731e+07	1.01478e+07	1.03858e+07	1.37976e+07	1.26379e+07	1.11144e+07	8.99938e+06	8.18102e+06	9.95091e+06	8.72087e+06	8.49427e+06	9.0524e+06	1.3366e+07	1.0722e+07	1.36691e+07	1.84867e+07	1.45154e+07	1.41124e+07	1.68887e+07	1.37167e+07	1.89716e+07	1.57618e+07	1.3687e+07	1.32526e+07
28	SM(d44:3)	C49H95N2O6P	838.695	3.379	pos	3.93738e+07	7.19618e+07	4.31138e+07	3.00009e+06	6.69073e+07	3.70153e+07	4.07143e+06	3.68572e+07	7.67297e+07	7.53111e+07	4.83486e+07	5.5289e+07	2.70843e+06	2.87582e+07	4.46895e+07	4.83299e+07	4.35052e+07	2.56144e+07	6.7462e+07	6.7624e+07	6.70707e+07	7.13616e+07	4.99492e+07	7.88195e+07	4.6448e+07	8.24979e+07	8.76941e+07	2.25926e+06	7.3949e+07	8.04909e+07
29	SM(d44:2)	C49H97N2O6P	840.706	4.87	pos	107061	100499	132727	108391	79184.7	74120	127280	118241	94487.6	120387	83476.3	81575.4	44777.3	72589.8	60978.2	70074.4	34595.9	56292	89605	119390	103169	154778	176803	188349	141413	96287.1	86589.8	58558.1	77943.4	117052
30	SM(d44:1)	C49H99N2O6P	842.722	4.865	pos	118667	108138	111956	119648	115782	100410	101737	124204	123604	109507	94956	82461.6	43828.4	75912.1	59844.2	62566.3	53516.8	45197.3	73736.2	91999.2	105299	99041.8	82322.5	137237	99546.8	68845	98820.5	75763.5	84058.3	78036.4
31	SM(d43:3)	C48H93N2O6P	824.676	3.176	pos	1.23686e+07	1.66711e+07	1.11513e+07	1.42632e+07	1.27496e+07	1.22955e+07	1.67457e+07	1.59743e+07	1.6519e+07	1.84497e+07	2.23226e+07	2.07844e+07	1.07952e+07	1.37074e+07	2.04217e+07	1.1572e+07	9.31548e+06	1.03856e+07	1.64977e+07	1.43595e+07	8.10026e+06	1.70728e+07	1.48847e+07	1.5871e+07	1.33725e+07	9.89235e+06	1.32744e+07	1.09737e+07	1.59277e+07	1.09942e+07
32	SM(d42:3)	C47H91N2O6P	810.667	3.155	pos	505659	1.40882e+06	803578	1.05032e+06	1.31383e+06	638041	1.26675e+06	546121	372269	773830	1.88637e+06	1.01341e+06	888585	987480	1.69403e+06	731907	1.09052e+06	710905	886136	945907	985243	727313	1.26669e+06	1.29518e+06	1.08858e+06	2.41435e+06	1.53589e+06	1.15203e+06	2.10794e+06	1.56408e+06
33	SM(d42:1)	C47H95N2O6P	814.691	4.866	pos	3.36877e+06	1.50657e+06	1.36415e+06	833477	1.33484e+06	1.3011e+06	2.37093e+06	1.51988e+06	1.6878e+06	1.36574e+06	1.43307e+06	1.9588e+06	1.22394e+06	1.47908e+06	1.44324e+06	1.43205e+06	1.67459e+06	1.30081e+06	933133	985838	1.8269e+06	2.22494e+06	1.30592e+06	2.49069e+06	1.27117e+06	1.10694e+06	1.14009e+06	1.40617e+06	985073	1.82779e+06
34	SM(d41:3)	C46H89N2O6P	796.644	3.074	pos	7.97115e+07	3.5344e+07	4.02981e+07	3.94335e+07	4.3857e+07	4.01228e+07	4.99086e+07	1.83421e+07	4.96262e+07	4.84419e+07	4.66756e+07	4.51763e+07	4.99531e+07	8.89772e+07	8.2169e+07	5.55841e+07	6.06212e+07	5.43337e+07	6.57313e+07	5.46174e+07	6.02737e+07	1.45709e+08	1.01128e+08	7.34942e+07	7.66588e+07	1.55762e+08	8.7227e+07	7.78265e+07	8.86682e+07	7.63075e+07
35	SM(d40:3)	C45H87N2O6P	782.628	3.02	pos	2.7701e+07	2.88206e+07	2.72008e+07	2.97974e+07	2.42424e+07	2.71492e+07	3.66389e+07	3.42729e+07	3.0854e+07	3.63862e+07	3.81244e+07	3.47285e+07	1.94724e+07	1.87512e+07	1.88934e+07	1.95654e+07	1.81698e+07	1.75868e+07	2.75772e+07	2.65809e+07	2.46046e+07	3.07084e+07	2.62275e+07	3.04129e+07	3.51269e+07	3.88632e+07	3.37485e+07	3.67477e+07	3.34231e+07	3.50053e+07
36	SM(d40:2)	C45H89N2O6P	784.644	4.886	pos	873953	131999	300959	114387	323030	135716	365495	319648	386399	129640	384647	378956	208669	101945	398410	135751	327631	99007.2	281178	301030	133437	275653	276005	521633	129763	188456	164445	120055	169940	162102
37	SM(d38:3)	C43H83N2O6P	754.598	2.887	pos	2.55293e+06	3.76368e+06	3.32486e+06	3.45466e+06	4.47111e+06	3.66599e+06	4.0675e+06	4.17604e+06	3.74544e+06	4.66028e+06	4.60179e+06	4.6916e+06	2.72479e+06	2.15786e+06	2.31153e+06	2.4629e+06	2.74499e+06	1.97027e+06	3.69317e+06	4.02616e+06	3.55594e+06	4.12206e+06	4.5936e+06	4.12043e+06	6.36632e+06	7.84634e+06	6.35676e+06	6.41833e+06	5.6434e+06	6.44758e+06
38	SM(d36:4)	C41H77N2O6P	724.551	4.89	pos	50860.7	131470	159113	160919	350622	159130	155370	140634	120493	147720	127353	155474	134953	88314.4	115640	161332	153296	149725	150675	131992	113650	170076	327331	144256	253127	116859	236839	101889	88698.1	105506
39	SM(d32:2)	C37H73N2O6P	672.519	2.544	pos	1.10297e+07	9.42466e+06	9.95255e+06	1.02403e+07	1.00628e+07	1.04942e+07	1.73301e+07	1.49419e+07	1.57254e+07	1.79398e+07	1.89742e+07	1.62914e+07	8.93705e+06	8.58822e+06	9.31351e+06	9.38151e+06	9.38961e+06	9.39075e+06	8.69318e+06	9.26052e+06	9.23913e+06	1.33667e+07	1.20238e+07	1.26627e+07	1.44999e+07	1.50538e+07	1.47827e+07	1.25223e+07	1.41394e+07	1.17093e+07
40	SM(d32:0)	C37H77N2O6P	676.55	2.736	pos	1.66855e+07	1.62854e+07	1.56652e+07	1.41069e+07	1.53213e+07	1.71082e+07	2.18896e+07	2.35304e+07	2.0342e+07	2.60304e+07	2.30721e+07	2.19738e+07	1.06294e+07	1.44605e+07	1.22857e+07	1.24102e+07	1.28442e+07	1.25666e+07	1.7814e+07	1.9169e+07	1.86454e+07	2.63075e+07	2.1819e+07	2.36051e+07	1.54517e+07	1.59608e+07	1.84979e+07	1.56009e+07	1.33988e+07	1.6207e+07
41	SM(d30:2)	C35H69N2O6P	644.489	2.357	pos	171700	187515	220056	203337	209897	192112	354789	377985	427766	448176	421431	426922	207067	171453	203737	232235	160093	179361	137950	127142	133067	180162	177188	212682	771737	673415	828383	751782	726015	729393
42	SM(d30:1)	C35H71N2O6P	646.504	2.502	pos	7.71083e+06	9.59179e+06	8.80897e+06	8.93997e+06	9.3899e+06	7.98326e+06	1.77334e+07	1.82382e+07	1.83059e+07	1.61687e+07	1.97264e+07	1.8772e+07	5.76514e+06	7.06641e+06	7.47891e+06	7.39245e+06	8.04382e+06	6.19147e+06	9.48547e+06	1.00221e+07	8.34809e+06	1.21628e+07	1.11966e+07	1.29812e+07	1.21642e+07	1.44659e+07	1.50246e+07	1.21994e+07	1.20011e+07	1.17248e+07
43	SM(d30:0)	C35H73N2O6P	648.52	2.579	pos	280254	474962	324828	310176	438377	264525	877298	953515	1.16772e+06	1.07075e+06	1.2492e+06	1.19335e+06	282621	320635	284251	404699	271695	369227	475687	406345	397613	666994	609734	617868	866446	764599	845460	684741	756186	744662
44	SM(d29:1)	C34H69N2O6P	632.489	2.409	pos	158414	153787	186086	153913	168474	153652	348149	318879	378662	440617	382937	368744	137619	131654	147729	163463	158240	143419	151093	155544	143372	187637	204974	222168	337964	335061	344522	289464	322652	345214
45	SM(d28:1)	C33H67N2O6P	618.473	2.312	pos	327164	383483	347512	338756	356381	299547	805987	920663	808159	977436	899335	979216	251621	263289	278754	283812	228571	266726	262430	260146	248041	321364	375603	294843	1.27372e+06	1.12408e+06	1.32083e+06	1.11474e+06	1.13081e+06	1.14138e+06
46	PS(37:5e)	C43H76NO9P	781.524	2.588	pos	1.40229e+06	2.16349e+07	1.75441e+07	1.09269e+06	2.33567e+07	1.75282e+07	1.55266e+07	1.6212e+07	1.61703e+07	2.15873e+07	6.70812e+06	2.72159e+06	1.83573e+07	1.44163e+07	1.41807e+06	1.66462e+07	1.24226e+07	2.19516e+07	2.15331e+06	2.27741e+06	2.06222e+07	2.39991e+06	2.36687e+07	2.32157e+06	3.39238e+06	2.14049e+07	1.98948e+07	1.48412e+07	1.46702e+07	1.11082e+06
47	PS(37:4e)	C43H78NO9P	783.54	2.581	pos	1.41582e+06	1.59097e+06	1.09908e+06	1.7825e+06	1.47269e+06	1.62403e+06	1.30264e+06	1.551e+06	1.90133e+06	2.94716e+06	2.85587e+06	3.18496e+06	1.80091e+06	1.36989e+06	1.68445e+06	1.24119e+06	7.51476e+07	1.49118e+06	1.85123e+06	2.09801e+06	2.04595e+06	2.4612e+06	1.99549e+06	1.92238e+06	1.60266e+06	754061	1.89861e+06	1.11364e+06	1.27844e+06	1.25672e+06
48	PS(20:4_22:6)	C48H74NO10P	855.503	2.527	pos	2.05014e+07	2.47558e+07	1.37736e+07	2.50013e+07	2.40674e+07	1.82405e+07	1.32797e+07	1.95791e+07	1.81844e+07	1.83508e+07	1.58204e+07	1.77484e+07	1.66656e+07	1.63655e+07	1.06906e+07	1.62198e+07	1.31337e+07	1.24958e+07	2.34535e+07	2.51972e+07	2.12351e+07	2.59669e+07	2.69622e+07	2.84081e+07	3.19817e+07	3.49379e+07	4.67981e+07	3.41347e+07	4.14719e+07	4.01318e+07
49	PS(18:2_20:4)	C44H74NO10P	807.504	2.604	pos	1.66156e+07	2.09533e+07	1.64949e+07	1.75993e+07	1.90387e+07	1.72453e+07	1.44698e+07	1.65586e+07	1.48852e+07	1.65137e+07	1.58222e+07	1.4982e+07	1.32483e+07	1.40566e+07	1.35368e+07	1.21797e+07	1.21901e+07	1.38474e+07	1.86384e+07	1.96498e+07	1.91692e+07	2.14505e+07	2.21047e+07	2.2826e+07	1.54863e+07	1.51244e+07	1.64885e+07	7.04687e+07	5.30256e+07	6.6977e+07
50	PS(18:1_20:3)	C44H78NO10P	811.536	4.972	pos	5.66389e+06	6.0219e+06	5.26354e+06	5.57133e+06	5.65748e+06	5.90544e+06	6.98995e+06	7.40958e+06	6.83695e+06	6.7477e+06	7.26162e+06	6.27462e+06	5.42606e+06	4.98991e+06	5.17236e+06	5.70552e+06	5.42912e+06	5.61584e+06	5.33135e+06	5.08209e+06	5.33678e+06	6.03249e+06	770241	6.61112e+06	5.01084e+06	5.26257e+06	4.95074e+06	5.02578e+06	5.24258e+06	5.23424e+06
51	PS(18:0_6:0)	C30H58NO10P	623.38	1.411	pos	5859.84	5639.08	5619.96	5986.26	5587.04	6165.89	5534.51	5885.35	5676.09	6143.89	6046.18	6461.7	5917.16	5841.8	6178.32	5380.6	5490	5601.8	5877.97	5410.04	5471.61	5515.72	5835.97	5818.04	6896.42	9900.66	7385.61	5979.04	5924.8	5793.08
52	PS(18:0_22:4)	C46H82NO10P	839.567	4.959	pos	1.17075e+06	1.04289e+06	1.05024e+06	1.22479e+06	1.18524e+06	1.14592e+06	1.12835e+06	1.12916e+06	1.08964e+06	1.27444e+06	1.22012e+06	1.35598e+06	903748	876831	505226	948532	1.03759e+06	999373	778459	671787	135835	956417	753977	798678	1.1249e+06	970337	973500	974006	542137	945738
53	PS(17:0_20:4)	C43H76NO10P	797.519	2.714	pos	1.05289e+07	1.02349e+07	1.00577e+07	1.03737e+07	1.07263e+07	1.03976e+07	1.01697e+07	1.03957e+07	9.85385e+06	7.17479e+06	7.71479e+06	7.84016e+06	8.62766e+06	8.67961e+06	8.59998e+06	7.59075e+06	7.94291e+06	7.72405e+06	9.27084e+06	1.00788e+07	1.07006e+07	1.46643e+07	1.46087e+07	1.62097e+07	5.52165e+06	8.83556e+06	8.29861e+06	1.09541e+07	1.07983e+07	1.0598e+07
54	PS(16:0_20:5)	C42H72NO10P	781.488	2.552	pos	1.25029e+06	1.28846e+06	1.08246e+06	1.09366e+06	1.21309e+06	1.24674e+06	1.0017e+06	1.09095e+06	1.04887e+06	1.14877e+06	1.10191e+06	1.16539e+06	1.11885e+06	1.00139e+06	1.08838e+06	936446	910647	911962	1.89368e+06	1.84728e+06	1.86235e+06	2.13711e+06	2.05705e+06	2.10439e+06	639488	601783	594652	561032	625272	657357
55	PIP(18:0_20:4)	C47H84O16P2	966.522	2.55	pos	1.57813e+06	1.50591e+06	1.71942e+06	902180	1.38101e+06	1.35347e+06	1.52685e+06	1.68376e+06	2.10402e+06	594205	860949	1.01049e+06	1.83271e+06	2.09801e+06	2.49108e+06	1.26811e+06	1.49743e+06	1.87224e+06	1.99947e+06	2.80849e+06	2.55142e+06	3.45312e+06	3.91674e+06	3.86841e+06	3.27452e+06	3.2255e+06	2.86389e+06	2.6501e+06	3.73257e+06	3.42778e+06
56	PI(38:6)	C47H79O13P	882.524	2.585	pos	925272	916323	1.13419e+06	1.20341e+06	1.42306e+06	1.33189e+06	1.49795e+06	1.66822e+06	1.52814e+06	736295	951603	804767	1.75496e+06	1.86877e+06	1.79651e+06	2.21671e+06	2.8111e+06	2.6142e+06	1.45942e+06	1.40613e+06	1.2832e+06	1.83164e+06	2.59409e+06	1.98471e+06	2.2433e+06	2.11376e+06	1.8351e+06	1.8111e+06	2.22942e+06	2.10191e+06
57	PI(38:3)	C47H85O13P	888.569	2.777	pos	3.04489e+06	3.91615e+06	3.13615e+06	6.46022e+06	4.2134e+06	4.17873e+06	5.63333e+06	4.86973e+06	5.42995e+06	2.086e+06	1.98447e+06	2.04715e+06	3.86958e+06	3.81713e+06	4.06244e+06	8.50492e+06	7.5771e+06	7.90231e+06	3.4087e+06	2.79507e+06	3.56395e+06	5.27615e+06	7.24598e+06	6.60199e+06	5.55145e+06	5.42921e+06	5.93349e+06	4.82164e+06	4.9143e+06	4.89905e+06
58	PI(18:1_20:4)	C47H81O13P	884.539	2.657	pos	3.73909e+06	3.27165e+06	3.64514e+06	4.60299e+06	4.26241e+06	4.34553e+06	7.52668e+06	7.05572e+06	7.45318e+06	3.09052e+06	3.20369e+06	3.24761e+06	5.35947e+06	4.838e+06	4.87749e+06	9.68606e+06	9.74396e+06	1.14619e+07	3.94372e+06	3.91457e+06	3.73915e+06	7.54545e+06	6.77464e+06	7.99478e+06	5.66652e+06	6.06667e+06	6.05022e+06	5.64276e+06	5.4476e+06	5.05581e+06
59	PE(48:3)	C53H100NO8P	909.722	3.264	pos	1.14403e+06	1.08901e+06	1.10122e+06	1.26672e+06	1.46734e+06	1.17866e+06	1.30566e+06	1.31704e+06	1.17942e+06	425140	261355	376092	1.15256e+06	1.27986e+06	1.3496e+06	1.76789e+06	2.17084e+06	1.89388e+06	673324	537439	844851	2.11918e+06	2.12301e+06	1.88906e+06	1.06102e+06	1.15619e+06	1.02448e+06	685630	1.01141e+06	1.25151e+06
60	PE(44:6e)	C49H88NO7P	833.627	3.314	pos	3.62871e+06	4.02561e+06	3.3077e+06	4.51756e+06	4.08572e+06	4.56874e+06	6.02365e+06	5.37483e+06	6.18936e+06	2.91307e+06	3.68886e+06	3.3278e+06	5.18276e+06	5.19624e+06	5.7453e+06	8.89499e+06	9.46576e+06	1.0075e+07	3.99291e+06	4.05822e+06	3.85855e+06	1.15448e+07	8.22884e+06	8.21917e+06	3.22305e+06	2.91267e+06	2.68936e+06	2.01293e+06	2.4356e+06	2.62962e+06
61	PE(42:8)	C47H78NO8P	815.544	2.954	pos	653496	950126	1.54095e+06	1.51542e+06	1.76883e+06	991910	1.35787e+06	1.22234e+06	1.44295e+06	2.61344e+06	2.49349e+06	1.60027e+06	1.27055e+06	1.33891e+06	817005	1.29746e+06	1.42391e+06	1.13427e+06	1.35484e+06	1.44333e+06	1.52515e+06	1.91459e+06	1.59947e+06	1.61529e+06	1.97948e+06	1.65731e+06	1.90705e+06	1.95109e+06	1.30417e+06	1.75089e+06
62	PE(38:8e)	C43H72NO7P	745.502	2.731	pos	3.25382e+06	3.85213e+06	2.26268e+06	3.29363e+06	4.03857e+06	3.19222e+06	8.93818e+06	8.58011e+06	7.12232e+06	7.64293e+06	6.94873e+06	7.00245e+06	5.928e+06	4.66877e+06	4.65779e+06	5.64231e+06	5.46679e+06	5.61736e+06	5.263e+06	7.60631e+06	7.86151e+06	7.0804e+06	8.08369e+06	9.67002e+06	2.77539e+06	2.71072e+06	2.52734e+06	2.81408e+06	2.71688e+06	2.35647e+06
63	PE(35:5)	C40H70NO8P	723.483	2.569	pos	1.32532e+06	1.20731e+06	1.34889e+06	1.25112e+06	1.13183e+06	1.34113e+06	1.49287e+06	1.30574e+06	1.51893e+06	2.17301e+06	3.23284e+06	2.3835e+06	1.13722e+06	1.23548e+06	1.30093e+06	1.00774e+06	968933	630840	1.49887e+06	1.59945e+06	1.3845e+06	1.92823e+06	1.93515e+06	1.2713e+06	961416	724835	1.08645e+06	801362	775305	883381
64	PE(35:2e)	C40H78NO7P	715.554	2.896	pos	3.47652e+07	3.23491e+07	3.49019e+07	3.23736e+07	3.72681e+07	3.39144e+07	3.8574e+07	3.62022e+07	3.43148e+07	3.33237e+07	3.08104e+07	3.28203e+07	3.2601e+07	3.37935e+07	3.0749e+07	3.28276e+07	3.57269e+07	3.34065e+07	3.59164e+07	4.04661e+07	3.69767e+07	5.33073e+07	5.26119e+07	5.11944e+07	2.55784e+07	2.65266e+07	2.2181e+07	2.12896e+07	1.99538e+07	2.09856e+07
65	PE(34:3)	C39H72NO8P	713.498	2.874	pos	1.11465e+07	1.224e+07	1.07072e+07	1.24226e+07	1.17336e+07	1.08161e+07	1.18029e+07	9.78839e+06	9.69928e+06	1.24399e+07	1.29609e+07	9.10527e+06	1.10387e+07	1.12353e+07	1.05261e+07	8.50833e+06	8.71076e+06	9.1541e+06	1.28338e+07	1.23957e+07	1.21751e+07	9.63378e+06	1.19367e+07	1.11304e+07	4.06899e+06	4.45196e+06	4.58011e+06	4.20407e+06	2.99925e+06	4.33943e+06
66	PE(33:2e)	C38H74NO7P	687.517	3.01	pos	5.82763e+06	2.68582e+06	5.03607e+06	3.20817e+06	7.40439e+06	4.85648e+06	4.67129e+06	4.99642e+06	4.62145e+06	7.6253e+06	4.94718e+06	5.84002e+06	5.0058e+06	4.28506e+06	4.40892e+06	3.2695e+06	3.33395e+06	3.70393e+06	2.93931e+06	7.86494e+06	3.99127e+06	1.04911e+06	4.36724e+06	4.71705e+06	3.21497e+06	3.98379e+06	3.6593e+06	3.64674e+06	4.28286e+06	4.16949e+06
67	PE(30:0)	C35H70NO8P	663.483	2.688	pos	363354	343146	476023	404773	374895	393887	493862	433548	440519	402563	438103	564619	456410	370637	407208	338144	398357	352334	396036	347058	365148	266809	317603	365491	135810	160494	168792	112809	122267	115633
68	PE(21:1)	C26H50NO8P	535.327	1.845	pos	430876	393433	357547	440522	437136	420639	344469	404772	373570	579782	506662	463585	472000	512026	458871	309273	322088	379311	583228	624414	717716	979728	1.00565e+06	953989	259656	279673	299846	223565	235316	244607
69	PE(20:5e)	C25H42NO7P	499.27	1.311	pos	1.25444e+06	1.32478e+06	1.40171e+06	956509	1.28683e+06	1.22596e+06	1.21516e+06	1.30047e+06	1.31546e+06	1.25414e+06	1.30312e+06	1.46314e+06	1.10204e+06	1.2079e+06	1.1393e+06	987214	1.09966e+06	1.17658e+06	1.63393e+06	1.68062e+06	1.73087e+06	1.64668e+06	1.76374e+06	1.75943e+06	921145	923157	1.0399e+06	909134	1.00263e+06	1.04855e+06
70	PE(20:4e_17:0)	C42H78NO7P	739.545	2.854	pos	3.22566e+07	3.15258e+07	3.36583e+07	3.4124e+07	3.22455e+07	3.38696e+07	4.35653e+07	4.54598e+07	4.76983e+07	4.92243e+07	4.81974e+07	5.19176e+07	3.7632e+07	3.69758e+07	3.5351e+07	3.59895e+07	3.62261e+07	3.55768e+07	3.43139e+07	3.34284e+07	3.11254e+07	3.66438e+07	3.6495e+07	3.68188e+07	1.52476e+07	1.72849e+07	1.55341e+07	1.57707e+07	1.51331e+07	1.58825e+07
71	PE(20:2e)	C25H48NO7P	505.317	1.862	pos	403935	496668	444468	502953	558448	556390	610515	597031	615045	462582	491312	662982	441755	546586	496339	567350	612882	578264	433663	473447	452020	512854	625433	576234	554287	598289	643633	496737	585769	612742
72	PE(20:1p_22:5)	C47H82NO7P	803.581	3.17	pos	7.08214e+06	7.20118e+06	6.94801e+06	7.35846e+06	7.47981e+06	7.06161e+06	8.74424e+06	8.77916e+06	7.78478e+06	7.54647e+06	6.34519e+06	7.42748e+06	8.03416e+06	8.12524e+06	8.46394e+06	1.08003e+07	1.12932e+07	1.11475e+07	1.19955e+07	1.03872e+07	9.34635e+06	1.49356e+07	1.48318e+07	1.45974e+07	8.56622e+06	8.23438e+06	7.79974e+06	8.16489e+06	7.76011e+06	7.09248e+06
73	PE(18:1p_22:6)	C45H76NO7P	773.534	4.882	pos	222476	218154	235553	209567	244943	192564	221779	256503	252722	263707	222360	218173	137390	105300	160991	189265	187190	184525	166062	216754	176379	302287	282660	397469	228204	267399	219537	266437	224683	207485
74	PE(18:1p_18:1)	C41H78NO7P	727.552	4.891	pos	514878	409262	493195	631942	625778	485406	550245	440969	704775	490465	1.19133e+06	478111	303759	464242	339549	462502	477554	401479	748743	427241	827742	701313	929217	741054	982957	441904	436424	873798	388663	433512
75	PE(18:0p_22:5)	C45H80NO7P	777.565	3.133	pos	2.24077e+08	3.70179e+08	2.49869e+08	4.05204e+08	3.61682e+08	3.75722e+08	4.21047e+08	3.9075e+08	3.8276e+08	2.40373e+08	2.4408e+08	3.51653e+08	3.42576e+08	3.35821e+08	3.47072e+08	3.75786e+08	3.7584e+08	3.96186e+08	3.04064e+08	3.12543e+08	3.25896e+08	4.10803e+08	4.15703e+08	3.89444e+08	3.21171e+08	1.89466e+08	3.15117e+08	2.78622e+08	2.9493e+08	3.03148e+08
76	PE(18:0p_22:4)	C45H82NO7P	779.581	3.199	pos	2.12575e+08	2.05786e+08	2.26918e+08	2.28927e+08	1.97741e+08	2.09068e+08	2.53829e+08	2.23252e+08	2.3438e+08	2.62311e+08	2.60551e+08	2.59071e+08	1.92851e+08	1.6565e+08	1.94908e+08	2.18468e+08	2.06717e+08	2.07988e+08	1.51784e+08	1.75362e+08	1.50368e+08	1.79295e+08	2.0221e+08	2.43762e+08	1.82482e+08	1.87877e+08	1.90407e+08	1.90804e+08	1.96716e+08	1.88518e+08
77	PE(18:0p_22:3)	C45H84NO7P	781.592	3.214	pos	4.73538e+07	4.2504e+07	4.43076e+07	4.57306e+07	4.7599e+07	4.54024e+07	4.78608e+07	4.98359e+07	4.75754e+07	4.84799e+07	4.98192e+07	4.92945e+07	3.75107e+07	3.39731e+07	3.58787e+07	4.30422e+07	3.96621e+07	3.92185e+07	3.07676e+07	3.42134e+07	3.09841e+07	5.25497e+07	4.12133e+07	4.01543e+07	3.80835e+07	4.1172e+07	4.10033e+07	3.62855e+07	3.47338e+07	3.47897e+07
78	PE(18:0p_22:2)	C45H86NO7P	783.614	3.242	pos	2.79696e+07	2.54013e+07	2.3771e+07	3.55405e+07	3.66184e+07	3.13982e+07	4.58896e+07	4.81879e+07	3.50544e+07	3.19252e+07	2.51714e+07	3.39307e+07	4.51625e+07	3.53489e+07	3.49693e+07	6.37744e+07	6.50077e+07	6.73283e+07	2.74187e+07	3.83655e+07	3.87323e+07	6.66498e+07	7.19679e+07	6.79791e+07	2.90664e+07	3.21172e+07	2.51057e+07	2.01862e+07	3.08999e+07	3.26225e+07
79	PE(18:0p_18:1)	C41H80NO7P	729.568	4.89	pos	1.40589e+06	1.88325e+06	2.55847e+06	1.63105e+06	2.01825e+06	1.48326e+06	1.57238e+06	1.2902e+06	2.18876e+06	1.6554e+06	3.17582e+06	1.46288e+06	1.58933e+06	1.83746e+06	1.36784e+06	1.39222e+06	1.79548e+06	1.63942e+06	1.10932e+06	1.48152e+06	1.01887e+06	2.98698e+06	3.28696e+06	3.27865e+06	2.34751e+06	2.07942e+06	1.21223e+06	1.12629e+06	2.28401e+06	1.52839e+06
80	PE(16:1e_18:2)	C39H74NO7P	699.52	3.446	neg	2.05605e+07	2.47557e+07	3.14466e+07	2.91903e+07	2.99079e+07	2.87265e+07	1.72092e+07	1.93484e+07	1.60436e+07	1.57239e+07	1.39494e+07	5.68899e+07	1.19724e+07	1.46424e+07	1.20316e+07	1.3066e+07	1.24481e+07	1.12767e+07	5.96374e+07	1.27846e+07	1.37647e+07	1.69405e+07	1.72849e+07	1.6453e+07	9.60848e+06	1.06243e+07	1.27807e+07	1.26552e+07	1.07755e+07	9.97303e+06
81	PE(16:0p_20:5)	C41H72NO7P	721.503	2.933	pos	4.17566e+07	4.55718e+07	4.70493e+07	4.50518e+07	5.43277e+07	4.4917e+07	3.32783e+07	3.02348e+07	3.62788e+07	3.5236e+07	3.72277e+07	3.53177e+07	2.72718e+07	2.79786e+07	3.01908e+07	2.68804e+07	2.56547e+07	2.62913e+07	4.94066e+07	4.61992e+07	4.39453e+07	5.90854e+07	5.07675e+07	6.05889e+07	3.18087e+07	2.68813e+07	3.17505e+07	2.88235e+07	2.58745e+07	2.78555e+07
82	PE(16:0_10:3)	C31H56NO8P	601.375	2.047	pos	72825.1	93409.2	74082.5	63962.3	115636	96553.9	59245.9	66824.3	112523	63799.2	80351.5	76303.3	70446.2	66747.1	52282.5	73350.4	91484.4	85156.7	57657.3	102160	189143	99416.7	264117	199620	54547.2	72513.8	64175.2	67530.4	76621	89725.5
83	PC(47:4)	C55H102NO8P	935.743	3.295	pos	765530	1.02911e+06	881725	788255	815413	690003	1.22161e+06	1.15382e+06	666952	773122	390980	764813	1.26476e+06	1.87091e+06	1.82174e+06	2.70197e+06	2.14953e+06	2.6697e+06	1.15473e+06	1.09698e+06	975383	1.2324e+06	2.02785e+06	2.09856e+06	677487	766268	1.19054e+06	1.21448e+06	1.1182e+06	814266
84	PC(46:2)	C54H104NO8P	925.749	3.47	pos	722328	1.03333e+06	753421	751871	724597	783863	630915	916691	611857	503591	568398	584579	631514	546240	677469	384216	577093	589027	649567	619626	674010	962792	1.16866e+06	797779	623027	570789	599302	448759	551643	478414
85	PC(45:4)	C53H98NO8P	907.71	3.238	pos	316215	270600	362936	585330	642334	533124	483171	433084	799842	364784	471970	184615	867621	685697	1.08075e+06	1.48401e+06	1.08238e+06	1.25018e+06	429639	400799	465874	959277	1.36964e+06	741853	841984	820284	824731	507259	938307	726282
86	PC(44:6e)	C52H94NO7P	875.675	3.237	pos	9.46706e+06	9.00475e+06	9.94689e+06	1.03203e+07	1.04921e+07	9.54128e+06	9.84619e+06	9.1e+06	1.04709e+07	6.97811e+06	6.97977e+06	6.4038e+06	1.09893e+07	1.21167e+07	1.27684e+07	1.93767e+07	1.83617e+07	1.76322e+07	8.49023e+06	8.47983e+06	8.82923e+06	1.55605e+07	1.62511e+07	1.50491e+07	1.27361e+07	1.26781e+07	1.30819e+07	1.17e+07	1.23159e+07	1.22362e+07
87	PC(44:4e)	C52H98NO7P	879.71	3.609	pos	8.56755e+06	9.98225e+06	8.37309e+06	1.04131e+07	1.23316e+07	1.28317e+07	1.42576e+07	1.26315e+07	1.3811e+07	6.01065e+06	5.10133e+06	5.6728e+06	7.07112e+06	8.22858e+06	7.30243e+06	1.43233e+07	1.63682e+07	1.50482e+07	6.70273e+06	6.34574e+06	7.99453e+06	1.53207e+07	1.47878e+07	1.54816e+07	1.25388e+07	1.41077e+07	1.16719e+07	1.20189e+07	1.18552e+07	1.17748e+07
88	PC(44:3e)	C52H100NO7P	881.716	3.388	pos	1.92542e+06	2.42221e+06	1.78796e+06	2.69132e+06	2.74342e+06	2.60898e+06	2.26391e+06	2.41143e+06	2.33187e+06	1.23845e+06	1.22231e+06	1.25167e+06	4.7959e+06	2.36478e+06	3.08571e+06	4.75727e+06	3.88405e+06	3.79439e+06	1.54945e+06	1.72592e+06	1.77562e+06	3.94809e+06	3.93328e+06	4.93602e+06	1.666e+06	367363	1.077e+06	291165	294924	979690
89	PC(44:3)	C52H98NO8P	895.701	3.293	pos	2.21901e+07	1.5494e+07	2.13979e+07	2.46329e+07	2.47155e+07	2.40509e+07	1.6121e+07	1.41981e+07	1.769e+07	1.23234e+07	1.01883e+07	1.28302e+07	2.74263e+07	2.82651e+07	2.6293e+07	3.95667e+07	3.92479e+07	4.43891e+07	1.75163e+07	1.89026e+07	1.71075e+07	2.96207e+07	2.88616e+07	3.2761e+07	1.85147e+07	2.16854e+07	2.17906e+07	1.87043e+07	1.77567e+07	1.38911e+07
90	PC(44:2e)	C52H102NO7P	883.738	3.449	pos	1.15411e+06	1.13384e+06	1.44278e+06	1.35922e+06	1.42141e+06	1.5433e+06	1.00452e+06	1.50289e+06	1.08603e+06	511405	625565	607703	1.69106e+06	2.38729e+06	2.04983e+06	2.96071e+06	2.93649e+06	2.41359e+06	827494	859860	930274	2.23584e+06	2.62951e+06	2.28565e+06	498738	455320	638226	558138	433533	448282
91	PC(43:3)	C51H96NO8P	881.681	3.489	pos	733333	757750	771199	570652	602299	657612	635153	577007	562040	629955	662690	677877	417548	446210	294616	297287	229310	218163	358293	510598	553611	408710	477049	598468	385137	423874	465243	411768	518463	459821
92	PC(42:9)	C50H82NO8P	855.573	2.859	pos	1.21509e+06	781252	1.16648e+06	1.43189e+06	1.15718e+06	1.82035e+06	3.22009e+06	3.31694e+06	3.25183e+06	1.96878e+06	1.67259e+06	736297	1.45652e+06	1.1596e+06	1.2048e+06	4.6929e+06	4.1646e+06	4.1479e+06	957318	850862	1.15514e+06	4.18924e+06	3.57838e+06	3.93676e+06	1.91518e+06	1.80484e+06	1.52274e+06	1.88933e+06	1.69992e+06	1.70475e+06
93	PC(42:8)	C50H84NO8P	857.591	2.907	pos	1.96127e+06	770611	1.26442e+06	2.51077e+06	1.85215e+06	2.09597e+06	4.63531e+06	3.55386e+06	4.4264e+06	920691	1.51572e+06	924385	1.54247e+06	2.28174e+06	1.52328e+06	4.54641e+06	4.75131e+06	5.05735e+06	457775	1.24822e+06	507884	3.98043e+06	4.56555e+06	4.24993e+06	1.52651e+06	2.49092e+06	2.42147e+06	2.40666e+06	1.73486e+06	1.94459e+06
94	PC(42:7)	C50H86NO8P	859.61	3.011	pos	1.50213e+06	811273	3.1732e+06	1.44553e+06	1.72984e+06	1.72665e+06	3.26144e+06	3.53513e+06	4.4436e+06	1.46509e+06	1.48778e+06	761348	2.32554e+06	2.14553e+06	1.21726e+06	4.0561e+06	5.12203e+06	4.62214e+06	5.20429e+06	3.26086e+06	3.43329e+06	4.77098e+06	4.05252e+06	5.61664e+06	3.42878e+06	4.03913e+06	2.29102e+06	3.9072e+06	2.60152e+06	2.25047e+06
95	PC(42:6)	C50H88NO8P	861.625	3.059	pos	2.10178e+06	2.13683e+06	2.36565e+06	2.97176e+06	3.65133e+06	2.76661e+06	4.02021e+06	3.99694e+06	4.48558e+06	2.48248e+06	2.17206e+06	1.74812e+06	3.57573e+06	3.66305e+06	3.5372e+06	6.55514e+06	6.86001e+06	6.40694e+06	3.92197e+06	3.66601e+06	3.67663e+06	6.10533e+06	5.39017e+06	6.40028e+06	3.61741e+06	3.0861e+06	2.16367e+06	3.22837e+06	2.65683e+06	4.45342e+06
96	PC(42:4e)	C50H94NO7P	851.674	3.273	pos	1.01067e+07	8.8407e+06	8.22351e+06	1.30266e+07	1.22145e+07	1.13749e+07	1.28284e+07	1.35149e+07	1.21849e+07	5.48264e+06	5.82475e+06	6.05827e+06	1.06944e+07	9.65864e+06	1.12042e+07	1.97632e+07	1.90389e+07	1.91972e+07	6.92718e+06	7.91674e+06	9.14646e+06	6.02633e+06	1.38432e+07	1.91389e+07	8.80703e+06	9.0094e+06	7.53332e+06	8.32362e+06	9.82673e+06	8.6304e+06
97	PC(42:4)	C50H92NO8P	865.652	3.179	pos	1.03607e+07	9.88314e+06	9.05482e+06	1.18278e+07	9.24229e+06	1.13248e+07	9.45063e+06	8.0848e+06	8.32667e+06	7.1496e+06	7.66147e+06	8.39477e+06	1.09581e+07	9.90465e+06	1.30156e+07	1.58318e+07	1.25468e+07	1.7173e+07	1.08531e+07	9.88488e+06	1.04722e+07	1.6364e+07	1.57407e+07	1.60245e+07	1.55413e+07	1.57464e+07	1.27413e+07	1.42289e+07	1.46823e+07	1.35375e+07
98	PC(42:3e)	C50H96NO7P	853.689	3.312	pos	2.03436e+07	2.01671e+07	1.62353e+07	3.17137e+07	2.63383e+07	1.78573e+07	2.95812e+07	1.76102e+07	1.6226e+07	7.45619e+06	9.58948e+06	9.42358e+06	2.66594e+07	3.20918e+07	2.24359e+07	2.70614e+07	3.91669e+07	1.39446e+07	1.49977e+07	1.53692e+07	1.52536e+07	5.03058e+07	5.42799e+07	3.91255e+07	1.29622e+07	1.18941e+07	1.18346e+07	6.55267e+06	1.09784e+07	1.16604e+07
99	PC(42:3)	C50H94NO8P	867.67	3.23	pos	1.69426e+07	9.06169e+06	1.88573e+07	1.21818e+07	1.28846e+07	1.14665e+07	8.84983e+06	1.94325e+07	9.87737e+06	1.29872e+07	6.33643e+06	6.1748e+06	1.18263e+07	1.30455e+07	6.18283e+06	2.01775e+07	1.85958e+07	1.73406e+07	1.00019e+07	9.95448e+06	5.86084e+06	3.22944e+07	2.13813e+07	1.86942e+07	8.05625e+06	1.53798e+07	1.34327e+07	1.37526e+07	1.22738e+07	1.27724e+07
100	PC(42:2e)	C50H98NO7P	855.706	3.37	pos	1.09135e+07	1.07193e+07	1.21325e+07	1.4385e+07	1.92012e+07	1.59717e+07	1.37437e+07	1.26852e+07	1.3014e+07	6.36464e+06	8.72555e+06	6.11672e+06	1.78673e+07	1.6092e+07	1.39461e+07	3.01902e+07	2.60331e+07	2.81554e+07	9.34114e+06	9.0033e+06	9.65052e+06	2.55944e+07	2.56335e+07	3.05489e+07	5.48549e+06	5.44316e+06	6.21961e+06	5.84853e+06	4.68519e+06	5.59611e+06
101	PC(42:1e)	C50H100NO7P	857.721	3.447	pos	3.72023e+06	3.19928e+06	3.50668e+06	2.94278e+06	4.16978e+06	3.09899e+06	3.53233e+06	2.37549e+06	2.59256e+06	2.58895e+06	2.47779e+06	2.5863e+06	4.56756e+06	6.73546e+06	5.38824e+06	6.75663e+06	6.24689e+06	5.92809e+06	3.6059e+06	4.63402e+06	5.32246e+06	3.9203e+06	9.01628e+06	6.14517e+06	2.71619e+06	2.16577e+06	1.38615e+06	1.24253e+06	1.93196e+06	2.87027e+06
102	PC(42:10)	C50H80NO8P	853.56	2.775	pos	3.04494e+06	2.80567e+06	2.86561e+06	3.59939e+06	4.14031e+06	3.6975e+06	2.82953e+06	2.35567e+06	3.40069e+06	2.75318e+06	2.08176e+06	2.51106e+06	3.94368e+06	3.14693e+06	3.15044e+06	4.25102e+06	8.91007e+06	3.39365e+06	3.41393e+06	3.6046e+06	1.77399e+06	4.80069e+06	5.23458e+06	4.75446e+06	3.84721e+06	3.27472e+06	2.78694e+06	3.28837e+06	3.00592e+06	3.21003e+06
103	PC(41:3)	C49H92NO8P	853.664	3.108	pos	4.11237e+06	5.07051e+06	3.87678e+06	3.59274e+06	3.1452e+06	4.24091e+06	4.22917e+06	4.08892e+06	4.21896e+06	3.09766e+06	3.55851e+06	3.51608e+06	2.80189e+06	3.58178e+06	2.8639e+06	3.69536e+06	4.07529e+06	4.28589e+06	3.05557e+06	2.26907e+06	2.92266e+06	3.46935e+06	4.20985e+06	5.06594e+06	4.1486e+06	5.33564e+06	4.36949e+06	4.64808e+06	4.77613e+06	5.12717e+06
104	PC(40:7e)	C48H84NO7P	817.595	2.988	pos	9.81312e+06	8.69203e+06	5.62052e+06	1.86207e+07	7.86342e+06	2.05391e+07	7.08678e+06	1.01344e+07	1.07389e+07	5.02963e+06	4.34879e+06	5.951e+06	1.74834e+07	1.56191e+07	1.64646e+07	1.36517e+07	1.49362e+07	1.68068e+07	1.06272e+07	1.58681e+07	1.10889e+07	1.39992e+07	1.68693e+07	2.2061e+07	1.69764e+07	2.81466e+07	1.69394e+07	2.66711e+07	1.97123e+07	2.19559e+07
105	PC(40:7)	C48H82NO8P	831.575	2.887	pos	2.71247e+07	2.87509e+07	2.95128e+07	3.76446e+07	3.60289e+07	2.96506e+07	5.10209e+07	4.16398e+07	4.22503e+07	2.81081e+07	2.71894e+07	2.60698e+07	2.86428e+07	3.33591e+07	3.68328e+07	5.25226e+07	5.71167e+07	5.77847e+07	3.59986e+07	3.91466e+07	3.14929e+07	5.53478e+07	5.56511e+07	5.98559e+07	3.23767e+07	3.33394e+07	3.3201e+07	3.33687e+07	2.89978e+07	2.90043e+07
106	PC(40:6e)	C48H86NO7P	819.611	3.081	pos	2.33681e+07	2.36589e+07	2.48591e+07	3.08032e+07	2.74081e+07	2.67568e+07	2.39132e+07	1.99511e+07	2.39134e+07	2.00391e+07	3.05293e+07	1.82878e+07	3.96145e+07	2.80659e+07	3.66538e+07	4.37424e+06	3.80688e+07	3.403e+07	3.09722e+07	2.11183e+07	3.76945e+07	3.64889e+07	3.05459e+07	3.35402e+07	3.39546e+07	3.63855e+07	5.18223e+07	4.6637e+07	3.06851e+07	7.34567e+07
107	PC(40:5e)	C48H88NO7P	821.627	3.115	pos	2.36792e+07	2.36346e+07	2.44547e+07	2.61303e+07	2.66889e+07	2.61304e+07	2.2594e+07	2.34038e+07	2.36208e+07	2.02958e+07	1.86498e+07	1.71048e+07	2.40238e+07	2.35767e+07	2.36302e+07	3.41767e+07	3.13708e+07	3.27504e+07	2.07774e+07	2.1939e+07	2.01495e+07	3.89013e+07	3.01858e+07	3.71212e+07	3.15455e+07	3.07662e+07	2.97113e+07	2.81136e+07	2.92747e+07	2.76999e+07
108	PC(40:5)	C48H86NO8P	835.607	3.071	pos	3.43214e+07	3.66466e+07	1.80739e+07	3.84959e+07	4.12312e+07	3.74116e+07	4.82321e+07	4.36245e+07	4.72701e+07	3.90829e+07	3.74804e+07	3.67539e+07	6.02628e+07	4.74371e+07	4.28299e+07	6.91879e+07	7.0928e+07	6.31737e+07	5.16543e+07	4.8914e+07	5.4671e+07	7.54905e+07	7.80709e+07	8.39342e+07	6.26974e+07	7.16767e+07	6.2675e+07	6.9947e+07	6.37006e+07	6.92598e+07
109	PC(40:4e)	C48H90NO7P	823.643	3.19	pos	1.8761e+07	2.10179e+07	2.14418e+07	2.92089e+07	2.27749e+07	2.73694e+07	2.0525e+07	2.15335e+07	2.12273e+07	1.22554e+07	1.28813e+07	1.23393e+07	1.4603e+07	1.502e+07	1.59036e+07	2.85707e+07	2.63434e+07	2.78644e+07	1.1072e+07	1.15398e+07	1.36403e+07	4.23752e+07	2.65812e+07	2.28986e+07	1.94118e+07	1.63337e+07	1.88607e+07	1.79333e+07	1.94928e+07	2.04357e+07
110	PC(40:3e)	C48H92NO7P	825.657	3.221	pos	1.1913e+07	1.1316e+07	1.11103e+07	1.36109e+07	1.00551e+07	1.45119e+07	1.54417e+07	1.36077e+07	1.64404e+07	9.25333e+06	1.08456e+07	1.0093e+07	9.15997e+06	8.42633e+06	1.13398e+07	1.85134e+07	1.78614e+07	1.5598e+07	9.23065e+06	8.45099e+06	8.96464e+06	2.21309e+07	1.7467e+07	1.9923e+07	1.25335e+07	8.04322e+06	9.54543e+06	8.83383e+06	1.06286e+07	8.89935e+06
111	PC(40:3)	C48H90NO8P	839.638	3.155	pos	7.1883e+06	4.62966e+06	6.26571e+06	6.6031e+06	8.07159e+06	8.48415e+06	8.51945e+06	7.26115e+06	7.64499e+06	6.04311e+06	9.54278e+06	5.16571e+06	5.56046e+06	1.22235e+07	7.42464e+06	1.4956e+07	1.29918e+07	1.585e+07	5.04413e+06	6.83134e+06	7.46312e+06	1.36918e+07	8.20632e+06	1.37335e+07	1.07555e+07	1.06124e+07	9.54108e+06	8.08003e+06	9.73458e+06	9.77965e+06
112	PC(40:2)	C48H92NO8P	841.653	3.228	pos	4.7294e+06	4.45917e+06	4.51228e+06	4.3142e+06	4.25623e+06	4.29227e+06	6.72683e+06	6.82284e+06	3.72177e+06	4.59866e+06	4.45325e+06	4.55958e+06	5.73715e+06	7.52151e+06	5.93268e+06	7.84756e+06	7.23086e+06	1.09198e+07	4.63549e+06	5.12526e+06	5.53462e+06	7.89762e+06	8.71086e+06	3.8743e+06	5.54299e+06	2.80884e+06	4.80216e+06	5.52825e+06	6.28232e+06	6.58163e+06
113	PC(40:1)	C48H94NO8P	843.669	3.3	pos	3.38684e+06	5.57695e+06	3.23346e+06	4.90235e+06	5.15913e+06	5.38265e+06	6.18368e+06	5.33398e+06	6.16298e+06	4.62462e+06	5.77828e+06	3.27993e+06	3.88344e+06	4.89649e+06	4.78561e+06	4.85112e+06	5.41e+06	5.51784e+06	4.68802e+06	4.08318e+06	4.0344e+06	5.98357e+06	5.46618e+06	6.76795e+06	4.0998e+06	2.71011e+06	4.53699e+06	3.96043e+06	4.76397e+06	4.33521e+06
114	PC(4:0_24:0)	C36H72NO8P	677.498	2.687	pos	3.85306e+06	3.84336e+06	3.66947e+06	3.87362e+06	3.54561e+06	3.79891e+06	3.96425e+06	4.77793e+06	4.40592e+06	4.65906e+06	4.75851e+06	4.98984e+06	4.92497e+06	4.6428e+06	4.45749e+06	4.52133e+06	4.64827e+06	4.93934e+06	3.63084e+06	4.06809e+06	3.8041e+06	3.87626e+06	4.57943e+06	4.79103e+06	3.04151e+06	2.82837e+06	2.53912e+06	2.56139e+06	2.5821e+06	2.60868e+06
115	PC(39:6)	C47H82NO8P	819.575	2.941	pos	6.6844e+06	1.14664e+07	9.70953e+06	9.87078e+06	7.50147e+06	9.08505e+06	7.10857e+06	7.67732e+06	1.15034e+07	9.92411e+06	1.00481e+07	1.25248e+07	9.03902e+06	8.40552e+06	1.2658e+07	1.04289e+07	1.00439e+07	1.02526e+07	2.31235e+07	1.95304e+07	2.66887e+07	2.81931e+07	2.07349e+07	1.85632e+07	1.60166e+07	1.44643e+07	1.31206e+07	1.37272e+07	1.39521e+07	1.27248e+07
116	PC(39:5)	C47H84NO8P	821.591	3.17	pos	8.33791e+06	8.28835e+06	9.29442e+06	9.03908e+06	8.25565e+06	7.96497e+06	9.91417e+06	1.04945e+07	9.51357e+06	8.75993e+06	7.77874e+06	7.87473e+06	8.9563e+06	9.92857e+06	9.53621e+06	1.21217e+07	1.35042e+07	1.2704e+07	1.24689e+07	1.08608e+07	1.03088e+07	1.57097e+07	1.56433e+07	1.58315e+07	9.81831e+06	9.71072e+06	8.85417e+06	8.96148e+06	8.63239e+06	7.7468e+06
117	PC(39:4)	C47H86NO8P	823.604	3.079	pos	2.78018e+06	2.61647e+06	2.72588e+06	3.49061e+06	3.04636e+06	3.30589e+06	3.77268e+06	3.91624e+06	3.32865e+06	3.04241e+06	2.69298e+06	1.89729e+06	3.60496e+06	3.27571e+06	2.14409e+06	4.90363e+06	5.06151e+06	5.18891e+06	3.21787e+06	4.32751e+06	2.75979e+06	5.73278e+06	5.91962e+06	5.50263e+06	2.79048e+06	3.69273e+06	2.97244e+06	2.81432e+06	2.79603e+06	2.96662e+06
118	PC(38:7)	C46H78NO8P	803.545	2.773	pos	7.13824e+07	3.60998e+07	6.81593e+07	7.30317e+06	7.91065e+07	6.59868e+07	7.08453e+07	7.08017e+07	1.54628e+07	6.84201e+07	4.93535e+07	6.76532e+07	6.71045e+07	6.0627e+07	5.13467e+07	6.89333e+07	6.5272e+07	6.21467e+07	6.47762e+07	6.94244e+07	7.0048e+07	4.00874e+07	7.56485e+07	7.05857e+07	5.62933e+07	5.86027e+07	6.42031e+07	5.82412e+07	5.40368e+07	4.03652e+06
119	PC(38:5e)	C46H84NO7P	793.596	3.027	pos	1.1256e+08	1.13695e+08	1.06725e+08	5.03996e+07	1.16892e+08	1.1356e+08	1.04563e+08	9.55253e+07	1.03614e+08	9.94957e+07	4.05294e+07	5.42331e+07	8.21252e+07	8.60182e+07	8.0777e+07	1.02117e+08	3.69809e+07	1.29975e+08	7.76843e+07	8.79302e+07	5.88734e+07	1.13379e+08	1.11575e+08	9.98456e+07	1.35576e+08	1.29718e+08	1.34287e+08	1.38639e+08	7.51579e+07	7.63797e+07
120	PC(38:4)	C46H84NO8P	809.592	4.902	pos	1.17533e+06	481372	320415	215445	282003	315413	291872	776720	281899	207352	241056	238718	136295	278903	328122	342229	514084	262245	194972	240083	250242	923139	378680	388579	411524	887153	354005	950387	863882	1.62975e+06
121	PC(37:6)	C45H78NO8P	791.551	3.023	pos	976018	9.22787e+06	1.02979e+07	1.15493e+07	1.09866e+07	914241	1.33029e+07	1.23134e+07	1.30461e+07	8.82138e+06	8.94065e+06	9.58891e+06	1.02275e+07	9.53007e+06	1.23021e+07	1.62454e+07	1.81933e+07	1.94564e+07	1.2194e+07	871188	1.05429e+07	1.88758e+07	1.88182e+07	2.09533e+07	1.07929e+07	3.98468e+07	1.07898e+06	9.88823e+06	9.17613e+06	1.19918e+06
122	PC(37:2)	C45H86NO8P	799.607	3.083	pos	1.04976e+07	9.38481e+06	1.0381e+07	9.91521e+06	1.07178e+07	9.88169e+06	1.16542e+07	9.39783e+06	1.02803e+07	9.8498e+06	8.11546e+06	1.10142e+07	1.21447e+07	1.19811e+07	1.14982e+07	1.46344e+07	1.53869e+07	1.46535e+07	1.14039e+07	1.31788e+07	1.11237e+07	1.51282e+07	1.49533e+07	1.53093e+07	1.066e+07	9.63652e+06	1.05844e+07	9.32308e+06	9.93324e+06	9.49983e+06
123	PC(37:1)	C45H88NO8P	801.623	3.165	pos	7.65873e+06	7.19266e+06	6.77361e+06	8.24714e+06	7.89627e+06	7.50627e+06	8.98188e+06	7.98366e+06	7.7454e+06	7.62173e+06	7.04517e+06	7.06563e+06	8.88646e+06	9.03235e+06	1.02393e+07	1.24473e+07	1.08735e+07	1.16769e+07	8.53876e+06	8.17143e+06	8.71577e+06	1.32617e+07	1.26705e+07	1.38745e+07	7.13834e+06	6.32397e+06	6.66692e+06	5.99367e+06	6.2152e+06	5.74509e+06
124	PC(36:6)	C44H76NO8P	777.529	2.736	pos	2.91774e+06	3.27348e+06	2.26268e+06	3.39586e+06	3.44973e+06	3.44202e+06	8.93818e+06	8.58011e+06	7.12232e+06	7.64293e+06	6.94873e+06	7.00245e+06	5.928e+06	4.98262e+06	4.76914e+06	7.04658e+06	6.63756e+06	5.71037e+06	7.36545e+06	7.60631e+06	7.86151e+06	6.5638e+06	8.08369e+06	1.05496e+07	2.77539e+06	2.71072e+06	2.42993e+06	2.81408e+06	2.71688e+06	2.55242e+06
125	PC(36:5e)	C44H80NO7P	765.567	4.887	pos	63702.8	62204	92861.2	60820.6	77008.8	69812.6	115651	71065.7	48340.7	82150	52000.7	48632.2	39437.8	35381.4	58471.1	56179.2	101460	71023.8	95061.7	44420.7	64590.6	110147	112659	154356	92108.8	50361.7	67801.7	50068.1	49949.9	67797.2
126	PC(36:2e)	C44H86NO7P	771.616	4.893	pos	61813	72215.1	60383.6	68284.2	74025.2	46968.9	60265.5	73309.4	71896.4	44869.9	60673.8	33413.2	22789	61094.2	40225.9	67775.8	70602.6	55498.6	46151.9	47892.7	39613.1	123228	77754.3	113725	62489.7	50751	43096.5	66341.2	59963.6	99754.3
127	PC(35:5)	C43H76NO8P	765.524	1.419	pos	354953	254415	400189	291140	286231	352981	520927	405011	499316	553500	438797	280696	368184	306002	392973	276020	263028	369785	309139	294894	382813	465924	319473	287263	809350	1.03917e+06	748620	354873	326448	509085
128	PC(35:2e)	C43H84NO7P	757.597	3.291	pos	8.28912e+06	1.03029e+07	7.65954e+06	9.1009e+06	1.0598e+07	8.62609e+06	9.6888e+06	8.43896e+06	8.4522e+06	6.97496e+06	5.99647e+06	5.9539e+06	1.01346e+07	1.29616e+07	1.13322e+07	1.47402e+07	1.4382e+07	1.63057e+07	9.06272e+06	7.90159e+06	7.9898e+06	1.25845e+07	1.48373e+07	1.54923e+07	5.05319e+06	4.89545e+06	4.05462e+06	5.37936e+06	4.46696e+06	5.13161e+06
129	PC(35:1)	C43H84NO8P	773.597	4.887	pos	118849	125308	96731.6	101957	98336.2	118781	92065.7	107464	59335.5	73070.1	126041	141623	86773.4	89402	113533	542448	460720	216755	94077.7	117310	60092.5	194169	99386.9	192416	81670.7	81665.1	92413.7	79400.7	75077.5	114019
130	PC(34:5)	C42H74NO8P	751.518	2.67	pos	1.27715e+06	1.15363e+06	1.60386e+06	1.48139e+06	1.32786e+06	1.31579e+06	2.86179e+06	2.00243e+06	3.03903e+06	2.45532e+06	1.51135e+06	2.92234e+06	1.37352e+06	1.19396e+06	1.36474e+06	1.9297e+06	1.47405e+06	1.67936e+06	1.31247e+06	2.25201e+06	1.32365e+06	2.62646e+06	2.0212e+06	2.37676e+06	400685	445718	475821	325350	476260	502388
131	PC(34:0e)	C42H86NO7P	747.613	3.167	pos	5.90937e+07	4.00291e+07	5.32031e+07	4.07596e+07	5.52421e+07	5.18205e+07	4.60853e+07	5.95479e+07	5.82552e+07	5.30194e+07	5.2748e+07	5.00504e+07	3.59695e+07	3.16312e+07	3.91648e+07	4.59438e+07	3.22931e+07	2.94785e+07	3.47094e+07	3.53014e+07	3.05136e+07	6.17701e+07	5.6882e+07	3.53981e+07	4.80565e+07	4.00836e+07	4.43237e+07	4.14248e+07	4.84194e+07	3.69505e+07
132	PC(33:2)	C41H78NO8P	743.545	4.895	pos	750529	306823	359081	616451	357557	364647	400580	382206	648927	365471	883427	377973	502143	333956	752377	353071	355359	337819	253874	753037	583779	511110	378244	928175	281614	285908	448609	218951	267457	258890
133	PC(33:1)	C41H80NO8P	745.561	3.126	pos	6.29609e+08	5.61716e+08	5.25339e+08	5.80445e+08	6.22083e+08	6.05762e+08	6.24928e+08	6.29797e+08	5.70301e+08	5.13799e+08	6.59388e+08	5.39767e+08	2.00276e+08	4.99408e+08	4.31663e+08	5.19976e+08	4.75314e+08	5.61194e+08	4.28957e+08	4.34999e+08	5.24301e+08	5.09306e+08	4.81967e+08	5.41299e+08	5.60875e+08	5.66158e+08	4.76026e+08	4.59816e+08	4.61086e+08	4.62418e+08
134	PC(33:0e)	C41H84NO7P	733.597	3.109	pos	3.63064e+06	3.34023e+06	3.14088e+06	4.18069e+06	3.75466e+06	3.87025e+06	3.50706e+06	3.72033e+06	3.67369e+06	2.64744e+06	2.89999e+06	2.81668e+06	2.47271e+06	2.44478e+06	2.50654e+06	3.28446e+06	2.86381e+06	3.03031e+06	2.48415e+06	2.59187e+06	2.42111e+06	5.5765e+06	5.16439e+06	5.52817e+06	2.34783e+06	2.44341e+06	1.78548e+06	1.66414e+06	2.15469e+06	1.84368e+06
135	PC(32:0_12:2)	C52H100NO8P	897.717	3.396	pos	7.5755e+06	6.59451e+06	8.2474e+06	9.03882e+06	1.04276e+07	7.3244e+06	9.31318e+06	6.40128e+06	6.31634e+06	5.18829e+06	5.79153e+06	4.59189e+06	8.32755e+06	5.49504e+06	8.72134e+06	1.18414e+07	7.61056e+06	8.0863e+06	5.34533e+06	6.82593e+06	4.51173e+06	1.23627e+07	1.11121e+07	9.26021e+06	5.99905e+06	5.81681e+06	5.99239e+06	7.42519e+06	6.0926e+06	8.56924e+06
136	PC(30:0e)	C38H78NO7P	691.549	2.932	pos	4.03286e+06	4.89287e+06	4.16394e+06	4.55887e+06	5.6076e+06	5.33525e+06	4.51941e+06	4.3361e+06	4.65814e+06	3.27997e+06	2.87255e+06	2.6299e+06	2.89081e+06	3.17119e+06	3.76747e+06	3.89213e+06	4.07784e+06	4.26961e+06	3.5435e+06	3.65279e+06	3.53206e+06	5.84549e+06	4.88969e+06	6.04034e+06	4.13522e+06	4.28006e+06	3.88915e+06	3.71505e+06	3.49071e+06	3.86467e+06
137	PC(30:0_10:4)	C48H88NO8P	837.622	3.109	pos	5.15744e+07	4.96993e+07	4.81742e+07	5.21544e+07	5.30967e+07	5.87722e+07	6.89485e+07	6.54289e+07	6.7869e+07	4.52796e+07	4.97441e+07	4.41299e+07	6.29121e+07	5.17788e+07	5.7818e+07	5.33963e+07	9.26396e+07	8.02107e+07	4.68195e+07	4.59052e+07	5.71817e+07	7.92266e+07	6.28e+07	7.37315e+07	6.12556e+07	6.26404e+07	8.07364e+07	7.30816e+07	6.63496e+07	1.02423e+08
138	PC(30:0_10:0)	C48H96NO8P	845.686	3.376	pos	1.76317e+06	2.90035e+06	2.27613e+06	1.5576e+06	2.82215e+06	2.63274e+06	2.07644e+06	2.99476e+06	4.67404e+06	2.36165e+06	2.29672e+06	2.27061e+06	833622	2.97728e+06	1.63083e+06	1.64377e+06	1.51943e+06	1.78556e+06	1.49623e+06	2.59372e+06	1.59739e+06	2.2597e+06	2.40791e+06	2.04144e+06	1.75695e+06	1.6778e+06	2.40376e+06	1.9435e+06	1.62616e+06	1.85258e+06
139	PC(30:0)	C38H76NO8P	705.529	3.048	pos	1.58263e+06	3.25129e+06	1.23215e+06	3.84759e+06	1.66198e+06	5.32614e+06	1.10359e+06	1.20131e+06	1.08839e+06	1.38471e+06	1.17864e+06	1.14792e+06	1.0416e+06	1.18491e+06	1.05471e+06	834342	992405	890833	3.49664e+06	8.38976e+06	1.59226e+06	1.57558e+06	1.60913e+06	1.21764e+06	641197	689416	537251	555492	823006	746500
140	PC(29:0)	C37H74NO8P	691.514	2.814	pos	2.71995e+07	2.81115e+07	2.43457e+07	2.44194e+07	2.34278e+07	2.17593e+07	2.39618e+07	2.31558e+07	2.21219e+07	2.58228e+07	2.58972e+07	2.00673e+07	2.18766e+07	1.82105e+07	2.2884e+07	1.96734e+07	2.03633e+07	2.271e+07	2.35752e+07	1.97186e+07	2.44692e+07	1.9154e+07	2.10695e+07	1.96706e+07	8.6753e+06	9.31036e+06	8.95815e+06	7.5305e+06	8.53326e+06	7.73487e+06
141	PC(26:1_11:2)	C45H84NO8P	797.59	3.054	pos	7.38388e+06	8.20611e+06	7.36575e+06	7.44284e+06	7.85989e+06	7.10838e+06	6.71079e+06	6.22653e+06	7.81974e+06	7.81537e+06	9.01583e+06	7.58246e+06	7.63522e+06	8.23022e+06	8.11944e+06	8.69576e+06	8.82512e+06	8.45969e+06	9.15355e+06	8.83109e+06	1.22927e+07	9.78748e+06	9.0033e+06	1.05537e+07	6.72781e+06	6.94817e+06	1.00387e+07	6.6998e+06	6.50993e+06	6.21165e+06
142	PC(26:0_11:4)	C45H82NO8P	795.576	3.189	pos	3.49764e+08	3.30069e+08	3.48982e+08	3.67403e+08	3.24498e+08	3.42166e+08	3.60666e+08	3.61718e+08	3.32641e+08	3.31937e+08	3.7453e+08	3.52044e+08	2.73507e+08	2.88902e+08	2.75332e+08	3.36137e+08	3.08861e+08	3.15231e+08	2.73093e+08	2.70269e+08	2.79345e+08	3.61502e+08	3.38019e+08	3.63742e+08	2.9413e+08	3.043e+08	2.97067e+08	2.57759e+08	2.80035e+08	2.62245e+08
143	PC(26:0)	C34H68NO8P	649.469	2.519	pos	484141	474414	498850	512074	476141	425300	459938	530058	529395	674179	673935	664398	266503	254294	229775	266551	282038	260357	389192	428063	394213	580004	652024	555572	266742	232234	243133	193254	223128	248334
144	PC(25:0_10:3)	C43H80NO8P	769.556	4.89	pos	58506.6	220143	53598.4	71391.6	77370.5	70203.5	82439.1	78637.2	51956.8	76723.8	73901.8	83882.8	385587	235072	141162	495734	482340	110180	54986.5	56011.5	94785.5	107882	97023.7	374903	213030	290013	70735.1	244268	222473	95697.6
145	PC(23:1_11:3)	C42H76NO8P	753.529	2.763	pos	7.4579e+06	6.54388e+06	6.59694e+06	7.10653e+06	6.77417e+06	7.55355e+06	1.41887e+08	1.43084e+07	1.33324e+07	1.20232e+07	1.13612e+07	1.39559e+07	7.91259e+06	8.60259e+06	9.03145e+06	1.10607e+07	1.21045e+07	9.60464e+06	5.29642e+06	7.06672e+06	6.67697e+06	1.07283e+07	1.08233e+07	9.52416e+06	4.12881e+06	4.4813e+06	3.83368e+06	4.18448e+06	4.2883e+06	3.68553e+06
146	PC(23:0)	C31H62NO8P	607.421	2.104	pos	1.42575e+06	459799	1.48251e+06	1.14266e+06	1.17363e+06	1.13047e+06	926374	918746	1.04204e+06	772548	941364	921347	304636	582971	918202	941312	324025	303317	308906	342129	338305	196703	639528	413378	471220	441633	480121	422158	527225	530771
147	PC(21:0_23:0)	C52H104NO8P	901.748	3.493	pos	694182	829600	763714	659894	913021	755254	728754	639722	688007	558913	464604	571961	303047	322385	278606	258170	630998	241775	382836	364622	356685	392938	509348	469534	311475	308484	393846	294846	270753	188460
148	PC(21:0_21:0)	C50H100NO8P	873.717	3.45	pos	6.524e+06	4.67469e+06	5.73854e+06	5.3018e+06	6.51105e+06	5.38747e+06	4.20917e+06	4.45874e+06	4.77224e+06	4.36645e+06	3.9853e+06	3.89648e+06	2.03329e+06	2.33245e+06	2.23471e+06	1.58501e+06	2.19342e+06	1.55588e+06	2.68765e+06	2.67719e+06	2.86216e+06	3.31385e+06	3.79253e+06	4.0744e+06	2.48777e+06	3.16725e+06	2.57576e+06	2.04861e+06	2.12153e+06	2.20412e+06
149	PC(20:1_20:5)	C48H84NO8P	833.591	2.729	pos	1.04332e+07	8.02345e+06	8.40664e+06	8.30783e+06	6.50738e+06	6.85313e+06	8.26177e+06	1.50576e+06	7.93781e+06	4.57356e+06	6.80932e+06	4.68075e+06	8.41969e+06	8.12659e+06	9.30872e+06	7.47979e+06	7.24882e+06	5.94628e+06	8.69895e+06	8.1351e+06	9.15528e+06	1.49898e+07	1.15235e+07	1.15733e+07	5.95423e+06	5.68396e+06	4.23114e+06	1.08675e+07	1.5702e+07	1.06673e+07
150	PC(20:0_24:1)	C52H102NO8P	899.733	3.46	pos	3.61518e+06	3.0591e+06	3.6918e+06	4.6011e+06	3.991e+06	3.84288e+06	3.05329e+06	3.0126e+06	3.10162e+06	2.58971e+06	2.40265e+06	3.81219e+06	1.87279e+06	2.27626e+06	2.15406e+06	1.74383e+06	1.51646e+06	1.39139e+06	2.68756e+06	2.43249e+06	2.51296e+06	3.11527e+06	3.25343e+06	2.33677e+06	1.55935e+06	2.46042e+06	2.7119e+06	2.43952e+06	2.1893e+06	2.46975e+06
151	PC(20:0)	C28H56NO8P	565.38	2.259	pos	119517	75388.9	101270	99460.9	102512	71147.1	120666	103511	134303	132715	143985	146958	175253	140689	153277	172174	131962	132088	67907.8	108222	111018	129405	97569.6	128117	436191	549674	557996	470261	443224	463178
152	PC(19:1_11:0)	C38H74NO8P	703.513	2.727	pos	3.1801e+06	3.26014e+06	3.55521e+06	3.45639e+06	3.15962e+06	2.89215e+06	4.17682e+06	3.6274e+06	4.11729e+06	4.44492e+06	4.25642e+06	4.00568e+06	4.25333e+06	4.71418e+06	4.18244e+06	5.30634e+06	4.84115e+06	4.51933e+06	3.96464e+06	3.6994e+06	4.14536e+06	4.23501e+06	4.09155e+06	4.96525e+06	2.11232e+06	2.22515e+06	1.86802e+06	1.80972e+06	1.86945e+06	1.90479e+06
153	PC(19:0_10:1)	C37H72NO8P	689.498	2.913	pos	6.25305e+06	6.53222e+06	9.14324e+06	1.16931e+07	7.84165e+06	6.5708e+06	6.92107e+06	7.59279e+06	9.1798e+06	1.07805e+07	8.28087e+06	8.75602e+06	6.99741e+06	6.25047e+06	7.48897e+06	6.59704e+06	6.30844e+06	6.24691e+06	9.66847e+06	6.39006e+06	7.09298e+06	6.71746e+06	9.78845e+06	1.04891e+07	5.75389e+06	5.8404e+06	5.33452e+06	4.63998e+06	4.44179e+06	3.78318e+06
154	PC(18:0e_18:1)	C44H88NO7P	773.627	3.182	pos	3.55803e+07	4.12496e+07	2.29641e+07	5.31905e+07	3.02546e+07	4.78364e+07	3.66936e+07	3.72646e+07	4.53907e+07	1.85613e+07	1.36183e+07	1.36573e+07	3.3352e+07	3.45318e+07	3.14317e+07	5.52896e+07	5.34854e+07	5.48704e+07	3.84481e+07	2.61337e+07	1.9164e+07	5.8155e+07	6.12311e+07	7.41991e+07	2.39325e+07	3.08848e+07	2.32566e+07	2.44749e+07	2.2786e+07	2.45419e+07
155	PC(14:1e_22:5)	C44H78NO7P	763.558	3.194	pos	8.81496e+07	7.75813e+07	7.66783e+07	8.82969e+07	7.963e+07	8.68111e+07	8.63857e+07	8.41264e+07	8.71369e+07	8.93371e+07	9.72245e+07	9.36408e+07	8.31923e+07	6.67061e+07	7.09194e+07	8.51899e+07	8.61387e+07	8.21098e+07	5.75154e+07	6.20564e+07	5.87092e+07	7.40396e+07	7.42553e+07	6.90886e+07	9.53281e+07	6.68571e+07	7.5378e+07	6.72892e+07	6.29113e+07	6.65171e+07
156	PC(14:1e_20:4)	C42H76NO7P	737.534	3.068	pos	3.60717e+07	2.0724e+07	3.16917e+07	3.80761e+07	3.73393e+07	3.53426e+07	3.63547e+07	2.19386e+07	3.55062e+07	3.37042e+07	3.59963e+07	1.98141e+07	1.40974e+07	2.33264e+07	1.28479e+07	2.46836e+07	2.71956e+07	2.62124e+07	3.23074e+07	3.24661e+07	3.20379e+07	4.36332e+07	2.72898e+07	3.95623e+07	3.21121e+07	1.87441e+07	3.31919e+07	2.6115e+07	2.83974e+07	2.37541e+07
157	PC(12:1e_22:1)	C42H82NO7P	743.581	3.065	pos	7.70583e+07	9.51104e+07	9.12376e+07	1.09975e+08	9.42545e+07	9.15184e+07	7.95485e+07	8.2251e+07	2.53421e+07	9.29037e+07	1.15185e+08	1.55888e+08	9.43626e+07	7.62711e+07	4.77985e+07	1.08001e+08	5.35191e+07	5.35769e+07	5.43034e+07	3.66915e+07	4.28938e+07	5.07635e+07	6.57528e+07	1.20792e+08	5.32924e+07	4.29315e+07	6.89412e+07	4.74864e+07	4.95107e+07	6.75022e+07
158	PC(12:1e_20:4)	C40H72NO7P	709.503	2.937	pos	5.34522e+06	5.70208e+06	5.38319e+06	3.47662e+06	6.06185e+06	5.37293e+06	3.57463e+06	3.20987e+06	3.55823e+06	3.22964e+06	3.95675e+06	2.71259e+06	2.98958e+06	2.68423e+06	2.76314e+06	2.60712e+06	3.00433e+06	3.06356e+06	5.28018e+06	3.74615e+06	4.83287e+06	5.73093e+06	3.84167e+06	5.52843e+06	1.45641e+06	1.3103e+06	1.11079e+06	1.28509e+06	980489	1.27382e+06
159	PC(10:0_22:3)	C40H74NO8P	727.513	2.935	pos	4.14003e+06	6.19244e+06	5.66565e+06	3.97299e+06	4.23207e+06	5.80925e+06	2.75176e+06	2.85055e+06	2.84327e+06	3.75188e+06	3.57141e+06	3.47376e+06	2.51889e+06	2.46067e+06	2.59521e+06	2.05727e+06	2.6733e+06	2.58741e+06	4.26125e+06	4.35058e+06	3.90346e+06	4.34702e+06	4.3416e+06	4.38004e+06	1.77686e+06	1.06621e+06	1.12589e+06	1.22954e+06	1.13127e+06	1.23151e+06
160	PA(16:0_20:5)	C39H67O8P	694.455	2.637	pos	2.69905e+06	1.81096e+06	2.25669e+06	2.65904e+06	2.64925e+06	2.39967e+06	3.14951e+06	2.2326e+06	2.64213e+06	2.47362e+06	2.69709e+06	2.54342e+06	1.54054e+06	2.0173e+06	1.60273e+06	586322	1.27964e+06	1.47928e+06	2.78968e+06	2.9256e+06	3.09152e+06	2.80937e+06	3.13784e+06	1.91116e+06	1.09958e+06	851172	438405	402736	969472	966161
161	LPS(22:6)	C28H44NO9P	569.275	1.141	pos	1.51342e+06	1.4867e+06	1.53023e+06	1.56653e+06	1.71342e+06	1.79862e+06	1.34678e+06	1.40662e+06	1.38231e+06	1.59882e+06	1.63264e+06	1.72048e+06	977741	1.01768e+06	981737	920086	870478	987751	1.14159e+06	1.23298e+06	1.24382e+06	1.64071e+06	1.51422e+06	1.59511e+06	1.85588e+06	1.84443e+06	1.83774e+06	1.4724e+06	1.58637e+06	1.50577e+06
162	LPS(22:5)	C28H46NO9P	571.291	1.252	pos	902622	925092	952486	962360	1.07003e+06	1.05392e+06	775297	865370	805892	971259	746211	970748	525967	497262	551288	393018	443936	547468	629898	564337	565266	562457	819761	680693	583725	470158	708187	613898	684025	504012
163	LPS(22:4)	C28H48NO9P	573.306	1.44	pos	458586	487712	575266	491961	518720	622026	445414	562303	507216	411740	462279	533535	334093	284692	337741	248528	261386	344726	291253	332365	296308	292999	281792	340527	454767	408323	362967	344590	383476	364333
164	LPS(22:3)	C28H50NO9P	575.323	1.649	pos	347294	248902	338051	279201	292411	330904	307493	275852	263070	186824	214747	273435	269858	256365	286528	265420	269453	222065	367994	382453	295825	339028	220707	196792	208786	229297	276743	164181	167096	166977
165	LPS(20:3)	C26H46NO9P	547.291	1.305	pos	359890	402877	400807	441901	451876	436867	216885	227419	215047	216821	233074	204628	224998	204902	236066	250628	245185	227987	214374	176879	228151	329098	305715	359802	249483	234702	241657	186358	204205	219670
166	LPS(18:1)	C24H46NO9P	523.291	1.459	pos	1.62891e+06	1.71351e+06	1.78977e+06	1.62707e+06	2.01451e+06	1.97277e+06	1.56036e+06	1.9217e+06	1.57463e+06	1.40911e+06	1.72774e+06	1.32158e+06	1.13862e+06	1.18763e+06	1.18813e+06	1.52265e+06	1.42819e+06	1.74715e+06	1.39077e+06	1.34954e+06	1.27913e+06	2.21033e+06	2.27449e+06	2.47482e+06	1.47282e+06	1.18699e+06	1.36521e+06	1.09348e+06	1.0901e+06	1.11079e+06
167	LPE(22:6)	C27H44NO7P	525.283	0.68	pos	39418.5	29395.3	32382	632788	551425	530104	91351.9	298692	300370	48500.2	26152.7	37615.3	36991	36133.8	38178	51270.8	57468.8	60691.1	515838	404527	444987	41081.3	38444.7	32774.1	107808	113325	90785.9	70060.7	44035.9	60441.2
168	LPE(22:4)	C27H48NO7P	529.316	3.728	pos	413785	217596	219280	390982	403925	300937	240929	517005	361229	385633	424227	192737	133503	178814	183009	134895	128363	137398	193225	252571	188568	203394	198902	238099	150867	147223	122879	182725	169079	185150
169	LPE(20:3)	C25H46NO7P	503.299	2.009	pos	869603	872295	757039	1.06852e+06	1.14905e+06	910649	1.38981e+06	1.35603e+06	1.45669e+06	756260	817442	816035	771827	679837	840546	1.1421e+06	1.20636e+06	1.31491e+06	462749	546485	525531	952506	1.22796e+06	1.24029e+06	930103	929425	1.08303e+06	981208	1.03569e+06	967640
170	LPE(20:1)	C25H50NO7P	507.332	2.052	pos	625697	569888	636658	700582	733321	704905	953472	829961	977645	649721	684053	654732	711149	646509	731629	1.02652e+06	1.12312e+06	1.19533e+06	441142	453646	472074	915037	941333	887158	787887	853870	793562	712269	699166	651618
171	LPC(24:0)	C32H66NO7P	607.457	2.644	pos	695741	909048	681292	741457	665306	961125	847258	755921	885023	838619	813741	903330	1.03339e+06	824737	766940	780407	832666	819884	795696	796450	846417	867924	949569	938472	1.04193e+06	879648	948806	1.06391e+06	1.11647e+06	1.26704e+06
172	LPC(22:6)	C30H50NO7P	567.332	1.468	pos	3.34592e+06	3.56693e+06	4.11908e+06	2.79031e+06	3.31588e+06	3.3738e+06	2.84104e+06	3.28978e+06	2.73442e+06	2.55253e+06	2.76487e+06	3.39588e+06	3.30697e+06	3.47846e+06	4.01675e+06	3.84154e+06	3.78882e+06	4.15236e+06	5.52831e+06	4.74524e+06	5.88591e+06	4.53712e+06	4.97926e+06	4.90005e+06	9.05142e+06	1.00959e+07	9.80547e+06	1.02128e+07	1.01866e+07	9.70052e+06
173	LPC(22:5)	C30H52NO7P	569.348	1.566	pos	911795	1.30884e+06	1.17383e+06	960904	1.07245e+06	925281	1.10839e+06	1.11856e+06	1.42915e+06	935873	1.06357e+06	1.00328e+06	1.10213e+06	1.11446e+06	1.09688e+06	1.43848e+06	1.29356e+06	1.33782e+06	1.3983e+06	1.32898e+06	1.29885e+06	1.3821e+06	1.53736e+06	1.10241e+06	1.41097e+06	1.52778e+06	1.64735e+06	1.70219e+06	1.29241e+06	1.7309e+06
174	LPC(22:4)	C30H54NO7P	571.363	1.758	pos	438277	467772	398423	448774	496930	525626	671153	728700	722628	334304	305690	323381	423193	482725	470764	1.05972e+06	851967	859899	278208	267966	251444	415727	500000	429608	584317	585925	679924	586876	684635	613168
175	LPC(22:1)	C30H60NO7P	577.411	2.251	pos	116405	128299	119803	125204	118063	124312	167942	180001	169814	137806	146180	144527	112642	106637	109099	223190	243502	183875	111364	97484.8	120953	196009	161646	195959	215871	232282	211604	211342	231497	187180
176	LPC(22:0)	C30H62NO7P	579.426	2.449	pos	254042	291818	259923	332723	349114	300449	439044	473213	444935	473288	454126	427672	303288	352098	336239	394616	366065	395596	258865	284875	249158	345057	348054	356140	370483	376933	421885	349171	366367	331137
177	LPC(20:5)	C28H48NO7P	541.314	1.275	pos	1.51804e+06	1.07772e+06	1.32462e+06	1.64942e+06	1.20487e+06	1.26487e+06	1.27909e+06	1.38981e+06	1.32768e+06	1.21257e+06	986881	1.34223e+06	1.0952e+06	1.1037e+06	1.42846e+06	1.30092e+06	1.25857e+06	1.66719e+06	1.94208e+06	2.54951e+06	2.51217e+06	1.89311e+06	2.02443e+06	2.02219e+06	2.06994e+06	1.37216e+06	2.01425e+06	1.85639e+06	1.89523e+06	1.85032e+06
178	LPC(20:4)	C28H50NO7P	543.332	1.489	pos	1.19304e+07	1.19294e+07	1.15508e+07	1.17448e+07	1.05747e+07	1.09279e+07	1.06321e+07	1.04463e+07	9.12252e+06	8.1226e+06	9.22826e+06	9.83092e+06	7.11724e+06	7.43357e+06	7.2683e+06	8.4938e+06	8.63256e+06	9.29771e+06	7.63155e+06	8.51608e+06	8.46043e+06	7.81496e+06	8.20383e+06	8.09499e+06	1.78081e+07	1.75701e+07	1.8736e+07	1.99851e+07	2.0169e+07	2.32164e+07
179	LPC(20:3)	C28H52NO7P	545.345	1.965	pos	5.25538e+06	5.83126e+06	6.00533e+06	4.39032e+06	6.31795e+06	5.2376e+06	4.21229e+06	2.06115e+06	5.01473e+06	5.55716e+06	4.0896e+06	4.93843e+06	3.57929e+06	2.9168e+06	3.93571e+06	3.66757e+06	3.95341e+06	4.0282e+06	3.99914e+06	3.827e+06	4.37133e+06	4.26865e+06	3.68657e+06	4.87078e+06	7.34158e+06	8.45264e+06	7.87055e+06	5.69748e+06	6.13667e+06	5.13031e+06
180	LPC(20:2e)	C28H56NO6P	533.384	1.932	pos	319473	315606	292313	383137	385683	384340	318008	205977	351494	82032.2	89404.8	82618.3	204083	207701	220464	408743	351874	394187	175626	106719	118887	334759	393139	357540	442617	341192	478991	424858	379345	421570
181	LPC(20:0)	C28H58NO7P	551.395	2.224	pos	1.52986e+06	1.7154e+06	1.38489e+06	1.77857e+06	1.99438e+06	1.86639e+06	2.97248e+06	2.37579e+06	2.82767e+06	1.69844e+06	1.6698e+06	1.8642e+06	1.63703e+06	1.80533e+06	1.79559e+06	2.87254e+06	3.32106e+06	3.06259e+06	1.33483e+06	1.35864e+06	1.28498e+06	2.40727e+06	2.34853e+06	2.51661e+06	1.80413e+06	1.70029e+06	1.65799e+06	1.71623e+06	1.77251e+06	1.58787e+06
182	LPC(19:0)	C27H56NO7P	537.379	2.101	pos	1.42317e+06	1.40058e+06	1.44197e+06	1.54027e+06	1.45471e+06	1.50712e+06	1.27567e+06	1.25507e+06	1.37816e+06	1.60914e+06	1.57202e+06	1.39816e+06	1.18923e+06	1.1251e+06	1.23145e+06	1.15339e+06	1.30797e+06	1.22446e+06	1.24634e+06	1.15959e+06	1.16359e+06	1.48826e+06	1.53441e+06	1.41498e+06	1.31809e+06	1.37788e+06	1.03463e+06	997173	951921	914433
183	LPC(18:3)	C26H48NO7P	517.317	1.302	pos	755396	725010	802603	702337	698450	609225	845936	906577	880406	704220	883159	717736	854699	689130	669379	835333	725019	842564	695138	818442	663125	421467	459933	669753	756296	645243	677062	827203	798334	855062
184	LPC(18:2)	C26H50NO7P	519.332	1.507	pos	6.2197e+07	6.54631e+07	6.06586e+07	5.32492e+07	6.52739e+07	5.51522e+07	5.15193e+07	5.01608e+07	4.84579e+07	5.1298e+07	6.1666e+07	4.63474e+07	3.30329e+07	3.73224e+07	4.17383e+07	2.62009e+07	3.02859e+07	3.92703e+07	3.47021e+07	4.48467e+07	3.56748e+07	2.66634e+07	3.12377e+07	3.4437e+07	7.84272e+07	8.10167e+07	8.29744e+07	9.51423e+07	9.6162e+07	1.0215e+08
185	LPC(18:1e)	C26H54NO6P	507.369	1.852	pos	4.71211e+06	5.09744e+06	4.00325e+06	5.82489e+06	6.20723e+06	6.11302e+06	5.1591e+06	5.34482e+06	4.95731e+06	2.404e+06	2.6248e+06	2.26988e+06	3.64605e+06	3.61968e+06	3.93097e+06	6.5272e+06	6.73546e+06	6.82616e+06	3.20642e+06	3.11792e+06	3.16944e+06	5.77105e+06	5.66458e+06	5.97511e+06	7.10252e+06	7.10945e+06	6.11943e+06	6.63083e+06	6.4716e+06	6.4295e+06
186	LPC(18:0e)	C26H56NO6P	509.384	2.083	pos	4.69551e+06	4.62893e+06	5.14292e+06	6.27555e+06	6.5897e+06	6.98206e+06	4.56066e+06	4.80629e+06	5.41241e+06	2.9293e+06	2.90239e+06	2.70648e+06	3.36156e+06	3.04234e+06	3.56527e+06	5.78429e+06	5.10818e+06	5.98987e+06	2.75749e+06	2.59154e+06	2.28676e+06	7.01884e+06	6.99486e+06	7.07699e+06	5.25361e+06	5.16688e+06	5.01266e+06	4.53591e+06	4.23974e+06	4.26531e+06
187	LPC(17:0)	C25H52NO7P	509.347	2.595	neg	4.2175e+06	4.77967e+06	5.2443e+06	4.35579e+06	4.70617e+06	4.49605e+06	4.74517e+06	4.2549e+06	4.53634e+06	4.90457e+06	4.87667e+06	5.23038e+06	2.89338e+06	2.9917e+06	2.81701e+06	3.07733e+06	2.80929e+06	3.21344e+06	3.08144e+06	3.2355e+06	3.3111e+06	3.54909e+06	3.38085e+06	3.5699e+06	4.38629e+06	4.99195e+06	5.02571e+06	4.81662e+06	4.20253e+06	4.48138e+06
188	LPC(16:1e)	C24H50NO6P	479.336	1.784	pos	3.37879e+06	3.2199e+06	3.72729e+06	3.70895e+06	3.77895e+06	3.15981e+06	2.96525e+06	2.75818e+06	3.02137e+06	2.31451e+06	2.064e+06	2.59785e+06	1.13765e+06	1.60826e+06	1.16564e+06	2.01963e+06	1.51115e+06	1.61363e+06	1.28956e+06	1.26251e+06	1.88839e+06	1.76286e+06	1.77719e+06	1.87077e+06	2.14192e+06	2.12673e+06	2.10632e+06	1.9878e+06	2.21181e+06	2.5339e+06
189	LPC(16:1)	C24H48NO7P	493.317	1.922	pos	81884	73884.3	79404.1	110372	101124	84046	113020	93784.3	100461	68224.1	79960.7	103403	95081	86365.1	93629.8	117815	154362	119460	70558.2	103213	78183.8	116418	139935	171175	77585.5	91587.7	75183.2	67543.1	71801.4	71162.4
190	LPC(16:0e)	C24H52NO6P	481.353	1.789	pos	8.22243e+06	8.73687e+06	8.63901e+06	1.02636e+07	1.10055e+07	1.00872e+07	1.00804e+07	9.52647e+06	9.64006e+06	5.70184e+06	5.27457e+06	5.34019e+06	5.55245e+06	6.19366e+06	5.38112e+06	1.01984e+07	7.61182e+06	9.1735e+06	4.72849e+06	4.49509e+06	4.48918e+06	7.25795e+06	1.01074e+07	9.79917e+06	9.24712e+06	9.74784e+06	1.01768e+07	8.95314e+06	8.97621e+06	9.62535e+06
191	LPC(15:0)	C23H48NO7P	481.317	1.478	pos	2.23364e+06	2.32768e+06	2.42298e+06	2.09276e+06	1.92277e+06	2.18462e+06	2.57664e+06	2.54497e+06	2.4418e+06	2.35897e+06	2.677e+06	2.59096e+06	1.73241e+06	1.87872e+06	1.52682e+06	1.83894e+06	1.78486e+06	1.79164e+06	2.08407e+06	2.38002e+06	1.9563e+06	1.77836e+06	1.91315e+06	1.94963e+06	2.28511e+06	1.98016e+06	2.13278e+06	2.28659e+06	2.18713e+06	2.2733e+06
192	LPC(14:0)	C22H46NO7P	467.301	1.279	pos	1.6347e+06	1.4628e+06	1.57304e+06	1.47393e+06	1.36462e+06	1.38152e+06	2.30186e+06	2.1519e+06	2.13516e+06	2.17122e+06	2.16372e+06	2.10745e+06	1.49166e+06	1.54613e+06	1.45773e+06	1.8512e+06	1.61029e+06	1.77167e+06	1.51096e+06	1.48187e+06	1.44909e+06	1.25371e+06	1.23007e+06	1.23159e+06	1.59537e+06	1.51462e+06	1.58773e+06	1.63406e+06	1.85094e+06	1.59253e+06
193	Hex3Cer(d18:1_24:0)	C60H113NO18	1135.79	3.237	pos	9.33807e+06	7.95079e+06	7.8821e+06	8.71508e+06	8.71363e+06	8.358e+06	3.87736e+06	4.57908e+06	4.51614e+06	3.69624e+06	3.98104e+06	3.9577e+06	6.32205e+06	5.82337e+06	6.6272e+06	5.78165e+06	4.49886e+06	4.53102e+06	5.68737e+06	5.79885e+06	6.12924e+06	4.18736e+06	4.70579e+06	4.65191e+06	5.10902e+06	6.10938e+06	7.42337e+06	4.72032e+06	4.78437e+06	5.09985e+06
194	Hex2Cer(t18:0_24:0)	C54H105NO14	991.762	3.624	pos	169679	180355	146135	152959	152006	37392.1	245377	214300	248508	96682.5	134424	118012	193720	216609	145825	277674	286555	270190	893342	716169	1.06292e+06	814433	764525	825266	2.22661e+06	2.28654e+06	2.09804e+06	2.43632e+06	2.1646e+06	2.29876e+06
195	Hex2Cer(d18:2_16:0)	C46H85NO13	859.599	2.725	pos	1.6344e+06	1.43671e+06	1.25665e+06	1.8142e+06	1.49352e+06	1.67048e+06	1.4216e+06	1.88878e+06	1.43444e+06	1.79754e+06	1.76611e+06	1.76714e+06	1.90283e+06	820367	2.09635e+06	2.10825e+06	2.32938e+06	2.24085e+06	2.33848e+06	2.64767e+06	2.20444e+06	2.17896e+06	2.43441e+06	2.13763e+06	1.20566e+06	1.59788e+06	1.23768e+06	1.69929e+06	1.7301e+06	752748
196	Hex2Cer(d18:1_24:2)	C54H99NO13	969.71	3.116	pos	1.00434e+06	869664	791106	1.17644e+06	1.61388e+06	1.78692e+06	1.98444e+06	1.76261e+06	2.13227e+06	367080	507546	260872	922827	1.13301e+06	961347	1.91809e+06	1.95256e+06	2.32554e+06	700465	556053	654504	2.71299e+06	2.19008e+06	2.53721e+06	1.09883e+06	877487	943865	1.06108e+06	953065	981417
197	Hex2Cer(d18:1_24:1)	C54H101NO13	971.725	3.183	pos	8.85851e+06	6.31831e+06	6.6481e+06	1.86462e+07	8.63719e+06	1.47304e+07	1.36249e+07	1.53642e+07	1.39255e+07	2.16385e+06	1.92042e+06	2.15573e+06	1.03097e+07	8.88318e+06	1.06547e+07	1.85588e+07	2.24226e+07	2.29001e+07	4.15283e+06	3.12797e+06	4.11662e+06	1.78233e+07	2.32833e+07	1.92162e+07	5.76171e+06	4.85969e+06	7.64017e+06	6.11204e+06	4.20924e+06	7.36222e+06
198	Hex2Cer(d18:1_24:0)	C54H103NO13	973.741	3.274	pos	2.57459e+06	1.82508e+06	2.53156e+06	4.63536e+06	3.30184e+06	4.24523e+06	5.29717e+06	6.44838e+06	4.94232e+06	1.47178e+06	1.20622e+06	1.56979e+06	5.12606e+06	3.51462e+06	4.74695e+06	7.45539e+06	7.0585e+06	5.88389e+06	2.41204e+06	2.14282e+06	2.3833e+06	5.09734e+06	5.2118e+06	3.92482e+06	2.38401e+06	2.38912e+06	2.80807e+06	2.64974e+06	2.95721e+06	2.00845e+06
199	Hex2Cer(d18:1_16:0)	C46H87NO13	861.615	2.84	pos	1.53561e+07	1.46495e+07	1.50496e+07	2.01958e+07	2.1983e+07	2.18607e+07	1.85934e+07	1.78032e+07	2.0342e+07	7.67298e+06	2.93283e+07	3.36577e+07	1.60621e+07	1.39091e+07	1.39114e+07	1.95877e+07	3.3941e+07	1.98489e+07	2.21556e+07	1.06517e+07	1.03542e+07	2.13345e+07	2.18217e+07	2.10774e+07	1.04409e+07	1.01238e+07	1.02421e+07	2.248e+07	8.91766e+06	9.62906e+06
200	Hex1Cer(d18:1_16:0+O)	C40H77NO9	715.559	2.546	pos	839206	889816	904169	956045	1.07319e+06	976512	759721	747629	851890	723221	669347	828545	450228	361984	504644	437595	427041	432523	593767	511955	634083	686807	691619	566836	244342	264136	231677	244798	252361	220240
201	GM3(d36:1)	C59H108N2O21	1180.74	2.675	pos	509220	603680	621001	536661	584174	571945	439366	381886	467798	367880	360318	401417	411602	345522	373578	358974	371168	349184	322454	350463	320683	302503	341484	466521	746900	675969	651073	698736	705199	728502
202	GM3(d34:1)	C57H104N2O21	1152.71	2.539	pos	6.06878e+06	5.71867e+06	5.8482e+06	5.83176e+06	5.62498e+06	5.56234e+06	5.68815e+06	5.35861e+06	3.85965e+06	4.87115e+06	5.08486e+06	3.32698e+06	4.51704e+06	4.43517e+06	5.17576e+06	4.79446e+06	4.42629e+06	4.37197e+06	4.63694e+06	4.98525e+06	4.57491e+06	4.07758e+06	6.95917e+06	5.51114e+06	7.0144e+06	7.93947e+06	8.08912e+06	7.46405e+06	7.7479e+06	7.98606e+06
203	DG(36:4e)	C39H70O4	602.526	3.293	pos	1.8873e+06	1.80492e+06	2.13454e+06	2.89377e+06	1.9717e+06	2.80339e+06	2.22343e+06	3.05986e+06	2.4687e+06	1.70712e+06	2.36306e+06	2.48174e+06	3.88936e+06	3.71514e+06	3.43614e+06	4.35629e+06	4.41556e+06	3.77318e+06	2.07087e+06	1.83103e+06	2.11185e+06	2.9686e+06	2.40975e+06	3.03023e+06	6.99414e+06	6.8612e+06	6.14267e+06	6.93724e+06	7.09314e+06	7.44226e+06
204	DG(36:3e)	C39H72O4	604.541	3.147	pos	1.47613e+06	1.69155e+06	1.30021e+06	2.14978e+06	2.11094e+06	1.9804e+06	1.99987e+06	1.51493e+06	1.89869e+06	2.33059e+06	1.67009e+06	1.31004e+06	1.89735e+06	2.16981e+06	2.21611e+06	2.34428e+06	1.5361e+06	2.2952e+06	1.91537e+06	1.46039e+06	1.15126e+06	1.4855e+06	1.32458e+06	1.93182e+06	1.56424e+06	1.27826e+06	1.32011e+06	1.31664e+06	1.38371e+06	2.08926e+06
205	DG(34:4e)	C37H66O4	574.495	2.759	pos	3.85541e+06	4.12773e+06	1.10832e+06	821847	1.29934e+06	3.70797e+06	1.10768e+06	3.07332e+06	289032	3.34187e+06	5.7915e+06	3.28565e+06	2.45558e+06	824545	2.12533e+06	3.25202e+06	1.63346e+06	3.19919e+06	4.1835e+06	3.49545e+06	2.87582e+06	2.47851e+06	186502	2.56237e+06	2.52195e+06	1.38947e+06	3.12031e+06	1.01726e+06	2.5302e+06	2.14626e+06
206	DG(34:3e)	C37H68O4	576.509	3.735	pos	1.8745e+06	1.19608e+06	1.63638e+06	1.09518e+06	1.38501e+06	1.24113e+06	1.62099e+06	1.51466e+06	1.69229e+06	1.02573e+06	674935	636829	3.47132e+06	2.9756e+06	3.99662e+06	5.94436e+06	5.1003e+06	5.4245e+06	1.69309e+06	2.75169e+06	2.21367e+06	1.98481e+06	1.86082e+06	1.59202e+06	4.57384e+06	4.24518e+06	3.42561e+06	4.51895e+06	4.37414e+06	4.29867e+06
207	DG(32:2e)	C35H66O4	550.495	3.263	pos	259893	159450	277084	323387	438348	337457	734899	787744	577166	464800	377514	416322	615779	423169	497550	679906	780633	680424	450818	494569	515890	501616	521547	50050.6	1.24705e+06	2.03828e+06	1.83079e+06	1.59731e+06	1.99721e+06	1.70458e+06
208	DG(23:3e)	C26H46O4	422.339	2.62	pos	3.88251e+06	4.21122e+06	4.21964e+06	3.65673e+06	3.38352e+06	4.10666e+06	4.4991e+06	3.39998e+06	4.65187e+06	3.7543e+06	3.41631e+06	3.18357e+06	3.74248e+06	3.88883e+06	3.98631e+06	5.18836e+06	5.81616e+06	5.76953e+06	5.6761e+06	4.197e+06	4.60451e+06	4.84017e+06	4.69091e+06	6.32279e+06	6.43095e+06	5.95236e+06	7.70668e+06	7.19904e+06	7.06377e+06	1.71898e+07
209	DG(18:0_20:4)	C41H72O5	644.534	3.358	pos	127518	96884.4	58987.8	47104.7	125081	115030	160123	66477.8	96844.5	42111.7	46914.9	48634.5	113667	53136.4	142398	134828	147689	162890	66266.5	56847.8	60167.2	90109.1	83452.2	97862.1	303719	295975	412770	424412	634524	411526
210	Co(Q10)	C59H90O4	862.683	3.608	pos	9.56651e+06	1.27884e+07	9.39661e+06	1.17097e+07	1.30675e+07	1.41286e+07	1.51899e+07	1.6434e+07	1.52549e+07	6.55043e+06	5.59035e+06	6.26057e+06	7.82414e+06	8.96945e+06	7.97604e+06	1.57016e+07	1.79703e+07	1.96486e+07	8.37358e+06	6.77972e+06	8.76036e+06	1.70079e+07	1.62459e+07	1.64787e+07	1.38422e+07	1.5574e+07	1.23968e+07	1.30612e+07	1.31091e+07	1.29463e+07
211	CL(74:4)	C83H154O17P2	1485.07	3.042	pos	1.66953e+07	2.28411e+07	1.54683e+07	1.55998e+07	1.90509e+07	1.94237e+07	1.60145e+07	1.51572e+07	1.67214e+07	1.83173e+07	1.74383e+07	1.53051e+07	1.39045e+07	1.49982e+07	1.4722e+07	1.0898e+07	1.33913e+07	9.26301e+06	1.49124e+07	1.62866e+07	1.36332e+07	1.77961e+07	2.07092e+07	1.82944e+07	1.18463e+07	9.69075e+06	1.11389e+07	9.89679e+06	9.90827e+06	1.03674e+07
212	CL(72:2)	C81H154O17P2	1461.07	3.042	pos	1.01551e+07	1.2153e+07	1.17733e+07	1.16915e+07	1.08166e+07	8.0344e+06	1.17201e+07	1.0475e+07	1.0055e+07	1.24264e+07	1.45484e+07	1.12969e+07	9.22712e+06	1.02601e+07	6.91388e+06	8.9007e+06	8.17516e+06	8.73958e+06	9.81686e+06	1.17931e+07	1.0117e+07	7.43085e+06	1.09543e+07	1.06674e+07	9.10327e+06	6.36438e+06	6.68096e+06	5.68914e+06	6.28617e+06	5.07945e+06
213	ChE(22:6)	C49H76O2	696.583	3.693	pos	2.40604e+07	1.94021e+07	2.15608e+07	1.5805e+07	1.90099e+07	1.65805e+07	3.07189e+06	1.9614e+07	1.80414e+07	1.15298e+07	1.21166e+07	1.48817e+07	1.66434e+07	1.34493e+07	1.37079e+07	1.72776e+07	2.11281e+07	1.81336e+07	2.75691e+07	3.26846e+07	3.05547e+07	3.55997e+07	2.76564e+07	3.86354e+07	3.85309e+07	3.34474e+07	3.00184e+07	3.24904e+07	3.55602e+07	3.42434e+07
214	ChE(20:4)	C47H76O2	672.583	3.698	pos	1.40858e+08	1.19469e+08	1.55892e+08	9.90479e+07	1.17037e+08	1.27185e+08	8.64836e+07	1.17088e+08	1.30814e+08	7.17754e+07	8.54582e+07	9.52202e+07	7.89216e+07	7.2077e+07	6.31491e+07	9.15101e+07	9.98929e+07	9.13149e+07	7.54412e+07	1.25979e+08	1.22199e+08	1.10415e+08	9.4168e+07	1.23659e+08	1.44896e+08	1.51172e+08	1.34279e+08	1.83797e+08	1.46149e+08	1.30863e+08
215	ChE(18:2)	C45H76O2	648.583	3.727	pos	3.53093e+08	2.98941e+08	3.15587e+08	2.83137e+08	2.8614e+08	2.92284e+08	3.09376e+08	3.09647e+08	3.27712e+08	2.37267e+08	2.30526e+08	1.93391e+08	2.04158e+08	1.91498e+08	1.52316e+08	2.2415e+08	2.2601e+08	2.32246e+08	1.95439e+08	2.46072e+08	2.60939e+08	1.8137e+08	1.92382e+08	2.13023e+08	2.56754e+08	2.67357e+08	2.4736e+08	2.71344e+08	2.09948e+08	2.25025e+08
216	CerG3GNAc1(d44:1)	C70H130N2O23	1366.91	3.271	pos	1.59106e+06	2.13623e+06	1.66314e+06	1.89288e+06	1.69334e+06	1.58678e+06	1.53014e+06	1.88531e+06	1.53685e+06	1.23537e+06	1.25192e+06	1.12952e+06	1.29366e+06	1.7451e+06	1.6977e+06	1.42696e+06	1.4403e+06	1.20239e+06	1.18532e+06	1.18151e+06	1.19366e+06	1.1934e+06	1.47214e+06	1.02454e+06	1.70795e+06	2.03265e+06	1.8649e+06	1.58454e+06	1.42836e+06	1.79593e+06
217	CerG3GNAc1(d42:3)	C68H122N2O23	1334.84	3.02	pos	3.27407e+06	3.76029e+06	3.30644e+06	3.89813e+06	3.47941e+06	3.68023e+06	2.39503e+06	2.74972e+06	2.30612e+06	2.80007e+06	2.52449e+06	2.44769e+06	3.55909e+06	3.48711e+06	8.76014e+06	2.9653e+06	3.87222e+06	2.02625e+06	2.24186e+06	7.84722e+06	2.19084e+06	2.78009e+06	2.32607e+06	2.43315e+06	3.73656e+06	3.83871e+06	3.70987e+06	4.03193e+06	3.46615e+06	3.96475e+06
218	CerG3GNAc1(d42:1)	C68H126N2O23	1338.87	3.182	pos	2.77439e+07	3.14267e+07	3.04496e+07	3.90172e+07	3.50652e+07	3.3238e+07	3.15027e+07	3.16622e+07	2.42313e+07	2.77777e+07	2.72363e+07	2.64472e+07	2.23046e+07	2.67323e+07	2.07592e+07	3.44903e+07	2.72209e+07	2.89807e+07	2.54229e+07	2.17704e+07	1.47051e+07	1.87818e+07	1.79254e+07	1.83317e+07	3.49681e+07	2.64032e+07	3.50907e+07	2.8496e+07	2.7186e+07	2.75766e+07
219	CerG3GNAc1(d41:1)	C67H124N2O23	1324.86	3.104	pos	5.98941e+06	5.2758e+06	4.96081e+06	4.76978e+06	5.21779e+06	4.98923e+06	4.49661e+06	3.62904e+06	3.90514e+06	3.7561e+06	3.80306e+06	2.93921e+06	3.22959e+06	4.64654e+06	4.34068e+06	4.29855e+06	4.4492e+06	3.35833e+06	3.45497e+06	3.14158e+06	1.95543e+06	2.85673e+06	2.45402e+06	2.88702e+06	4.04099e+06	3.75446e+06	3.53477e+06	2.72012e+06	3.26703e+06	2.92681e+06
220	CerG3GNAc1(d40:1)	C66H122N2O23	1310.84	3.092	pos	1.44198e+07	1.07555e+07	1.0446e+07	1.10949e+07	1.07178e+07	1.28741e+07	9.08752e+06	8.8251e+06	6.62636e+06	8.5035e+06	6.18484e+06	6.81964e+06	1.18621e+07	1.03888e+07	9.78046e+06	9.49233e+06	9.86943e+06	7.57084e+06	4.90715e+06	6.13977e+06	6.49958e+06	6.78323e+06	5.26442e+06	5.04053e+06	8.98211e+06	9.54811e+06	7.90759e+06	7.80716e+06	8.20723e+06	7.60318e+06
221	CerG3GNAc1(d34:1)	C60H110N2O23	1226.75	2.722	pos	1.27215e+06	1.33463e+06	1.24519e+06	1.69368e+06	1.31399e+06	1.5527e+06	1.45382e+06	1.42606e+06	1.3931e+06	824512	925191	875006	1.18493e+06	1.21793e+06	1.2249e+06	1.79663e+06	6.34666e+06	1.64517e+06	885147	1.16693e+06	1.01309e+06	1.30012e+06	1.32593e+06	1.38176e+06	1.29638e+06	1.30263e+06	1.31764e+06	1.51329e+06	1.11538e+06	1.47472e+06
222	Cer(t18:0_24:0+O)	C42H85NO5	683.642	3.358	pos	3.48654e+06	2.35631e+06	2.46854e+06	3.49603e+06	2.45787e+06	2.33787e+06	3.18407e+06	2.43335e+06	3.31497e+06	1.97039e+06	2.76079e+06	2.11531e+06	4.94054e+06	4.83053e+06	3.41041e+06	5.07244e+06	3.94648e+06	4.23005e+06	2.73518e+06	2.89614e+06	2.34151e+06	2.66465e+06	4.66794e+06	4.77286e+06	2.3383e+06	1.76539e+06	2.38133e+06	2.00384e+06	2.37855e+06	2.35317e+06
223	Cer(t18:0_22:0)	C40H81NO4	639.616	3.291	pos	2.33771e+07	2.4227e+07	2.51636e+07	2.66114e+07	2.75119e+07	2.56551e+07	3.32909e+07	862524	3.41186e+07	3.49974e+07	3.41835e+07	3.30682e+07	3.28715e+07	3.32428e+07	3.53767e+07	3.46177e+07	3.8269e+07	3.50364e+07	2.99362e+07	2.61684e+07	3.38775e+07	4.07529e+07	4.33974e+07	452607	4.13298e+07	4.07593e+07	3.15361e+07	3.90189e+07	3.79224e+07	3.70994e+07
224	Cer(m42:1)	C42H83NO2	633.641	3.44	pos	5.73945e+06	4.96651e+06	5.76763e+06	6.15794e+06	5.90156e+06	5.90288e+06	7.22733e+06	8.46166e+06	6.32104e+06	6.17115e+06	6.98071e+06	6.52561e+06	6.39484e+06	4.69471e+06	4.58673e+06	3.84664e+06	5.66843e+06	5.55421e+06	3.45449e+06	4.5457e+06	5.98241e+06	5.84463e+06	8.53571e+06	5.59201e+06	5.70326e+06	5.01933e+06	4.02937e+06	3.54347e+06	3.44898e+06	3.62903e+06
225	Cer(m18:0_24:0)	C42H85NO2	635.658	3.503	pos	4.82866e+06	5.34947e+06	5.13808e+06	4.82566e+06	6.00947e+06	5.19272e+06	8.64486e+06	1.02887e+07	7.36564e+06	5.85475e+06	6.28696e+06	6.96133e+06	3.8307e+06	3.60963e+06	3.43996e+06	3.21046e+06	2.34809e+06	3.28516e+06	2.74751e+06	2.65306e+06	2.81436e+06	2.48622e+06	2.51395e+06	2.68865e+06	2.0968e+06	2.06253e+06	2.60496e+06	1.67625e+06	1.86897e+06	2.3251e+06
226	Cer(m18:0_22:0)	C40H81NO2	607.626	3.439	pos	1.36991e+06	1.61707e+06	1.28942e+06	1.84162e+06	1.66171e+06	1.12175e+06	2.20361e+06	2.36065e+06	1.88146e+06	1.46967e+06	854333	1.55736e+06	1.06397e+06	1.19307e+06	1.02608e+06	1.42478e+06	1.33689e+06	1.37354e+06	596949	682626	772103	1.07275e+06	1.40297e+06	1.20274e+06	819723	643001	880816	812781	706693	828726
227	Cer(d18:2_25:1)	C43H81NO3	659.621	3.336	pos	831523	800451	873108	740766	907761	721332	1.14044e+06	1.20485e+06	1.2062e+06	1.20659e+06	1.24401e+06	1.16039e+06	1.03827e+06	1.03802e+06	1.21218e+06	1.09989e+06	1.00671e+06	1.07541e+06	1.21532e+06	1.44636e+06	1.16318e+06	1.84349e+06	1.64865e+06	1.77541e+06	1.14629e+06	1.01315e+06	1.09005e+06	1.01232e+06	915640	1.07402e+06
228	Cer(d18:2_24:2)	C42H77NO3	643.589	3.234	pos	1.72122e+06	2.06311e+06	1.60176e+06	2.00058e+06	1.95451e+06	1.90836e+06	3.13027e+06	3.06013e+06	2.62573e+06	2.97505e+06	3.09792e+06	2.53889e+06	3.24751e+06	2.64918e+06	2.69722e+06	2.4435e+06	2.54753e+06	2.83378e+06	2.23177e+06	2.23753e+06	2.08411e+06	2.81675e+06	3.12513e+06	2.94713e+06	4.01261e+06	3.6508e+06	4.30619e+06	3.68223e+06	3.61921e+06	4.01247e+06
229	Cer(d18:1_26:1)	C44H85NO3	675.652	3.43	pos	1.69216e+07	1.21871e+07	1.4107e+07	2.0527e+07	1.9004e+07	1.41121e+07	2.28262e+07	2.58169e+07	2.21163e+07	1.49628e+07	2.07794e+07	2.09661e+07	2.20348e+07	2.16328e+07	2.52297e+07	2.37385e+07	9.30905e+06	1.58969e+07	1.95354e+07	1.60121e+07	1.84138e+07	2.23594e+07	2.51776e+07	2.92224e+07	1.50109e+07	1.23388e+07	1.39981e+07	1.16223e+07	1.15301e+07	1.21836e+07
230	Cer(d18:1_24:0+O)	C42H83NO4	665.631	3.36	pos	3.02504e+06	1.87061e+06	2.0067e+06	2.92016e+06	2.75777e+06	1.83812e+06	4.2081e+06	2.81247e+06	3.94619e+06	3.37668e+06	2.36934e+06	2.16433e+06	4.44606e+06	4.32334e+06	3.85151e+06	4.6236e+06	3.41332e+06	3.65712e+06	3.55834e+06	2.54631e+06	3.39201e+06	3.16196e+06	4.22551e+06	4.35695e+06	1.71504e+06	1.29764e+06	1.88954e+06	1.56635e+06	1.33275e+06	1.89615e+06
231	Cer(d18:0_23:0)	C41H83NO3	637.637	3.421	pos	1.80273e+06	1.69057e+06	1.79793e+06	1.74976e+06	1.82707e+06	2.29959e+06	3.12695e+06	2.67608e+06	2.93163e+06	1.13857e+06	1.93465e+06	2.04999e+06	2.26836e+06	2.00016e+06	3.02708e+06	2.61384e+06	2.27107e+06	2.44961e+06	2.27093e+06	1.91483e+06	2.50389e+06	3.08516e+06	3.27558e+06	3.32426e+06	1.55746e+06	1.23803e+06	1.08039e+06	1.50514e+06	1.39369e+06	1.52483e+06
232	Cer(d18:0_22:0)	C40H81NO3	623.619	3.325	pos	1.9978e+06	1.92721e+06	2.13964e+06	1.74445e+06	1.62889e+06	2.10457e+06	2.81117e+06	2.43497e+06	2.92195e+06	2.63918e+06	2.5753e+06	2.712e+06	2.7757e+06	2.48476e+06	2.56148e+06	3.03407e+06	2.5429e+06	2.7053e+06	1.73136e+06	2.24128e+06	2.35202e+06	3.02362e+06	2.92343e+06	2.88382e+06	2.13043e+06	1.8771e+06	2.37985e+06	1.86341e+06	2.18738e+06	2.21065e+06
233	Cer(d18:0_18:0)	C36H73NO3	567.558	3.217	pos	682793	873867	729087	776386	758797	622274	1.19621e+06	1.56433e+06	1.49124e+06	907749	1.16879e+06	1.4316e+06	1.37907e+06	1.52589e+06	1.62803e+06	1.67042e+06	2.30375e+06	1.97047e+06	845379	905222	862162	1.48124e+06	1.59336e+06	1.49661e+06	1.04349e+06	1.5473e+06	1.15615e+06	696042	950078	993722
234	Cer(d18:0_16:0)	C34H69NO3	539.526	3.296	pos	889046	870804	424724	912357	715045	513396	824867	804980	737380	921702	575232	1.04014e+06	1.0757e+06	623871	984793	1.46038e+06	896388	1.0996e+06	1.19069e+06	858376	883505	1.16191e+06	1.15842e+06	1.03833e+06	1.23292e+06	569758	987362	926220	1.35806e+06	1.45935e+06
235	Cer(d17:1_24:2)	C41H77NO3	631.589	3.256	pos	1.27407e+06	728728	812417	1.00026e+06	1.24482e+06	926442	1.90824e+06	1.33929e+06	1.26401e+06	1.59853e+06	1.38168e+06	1.92548e+06	961786	962586	971518	1.37757e+06	1.54741e+06	1.50194e+06	1.38506e+06	1.00575e+06	1.10452e+06	1.29467e+06	1.31581e+06	1.42935e+06	957764	1.31582e+06	1.4452e+06	1.0534e+06	1.16355e+06	835983
236	Cer(d17:1_22:0)	C39H77NO3	607.589	3.305	pos	3.10645e+07	2.75772e+07	2.75079e+07	2.53196e+07	3.06431e+07	2.86885e+07	3.81056e+07	8.93849e+06	3.86255e+07	3.94314e+07	3.87169e+07	3.82215e+07	3.04319e+07	3.54275e+07	3.80997e+07	3.25896e+07	4.18194e+07	3.81572e+07	3.2331e+07	3.54282e+07	3.35851e+07	4.5994e+07	5.04107e+07	4.45911e+06	4.41582e+07	4.21729e+07	4.1407e+07	3.81644e+07	4.24956e+07	3.56667e+07
237	CarE(16:1+O)	C23H43NO5	413.313	1.618	pos	4.64893e+06	3.10234e+06	4.58521e+06	6.2684e+06	5.05306e+06	5.12676e+06	5.4662e+06	2.47121e+06	1.79375e+06	4.2232e+06	5.53309e+06	4.84395e+06	2.70959e+06	5.90869e+06	5.48243e+06	4.56813e+06	2.21274e+06	5.05379e+06	3.23328e+06	5.03773e+06	5.65642e+06	4.83518e+06	5.16702e+06	5.01061e+06	4.94199e+06	5.36099e+06	2.64447e+06	4.42569e+06	4.40853e+06	4.46013e+06
238	CarE(14:1)	C21H39NO4	369.288	1.623	pos	3.26718e+06	1.49041e+06	3.70815e+06	1.54967e+06	3.69601e+06	3.23279e+06	1.77945e+06	1.62047e+06	3.31451e+06	1.18513e+06	3.14808e+06	3.09755e+06	3.47743e+06	1.59744e+06	3.3233e+06	3.58938e+06	3.84265e+06	3.57466e+06	3.5508e+06	3.59453e+06	1.82268e+06	3.1384e+06	3.89426e+06	3.8817e+06	1.60297e+06	3.42559e+06	3.47396e+06	3.57673e+06	3.5972e+06	3.57232e+06
239	AEA(18:1)	C20H39NO2	325.298	2.03	pos	394489	416297	454747	368131	477564	438570	460749	507274	530128	467881	488524	587945	446848	545204	639424	450116	573638	606585	528720	466507	576917	852355	865946	873928	347263	373696	517013	357846	324922	387422
240	AEA(16:0)	C18H37NO2	299.282	1.581	pos	8.11584e+06	9.1551e+06	9.07194e+06	1.42823e+07	1.38785e+07	1.45495e+07	2.43037e+07	2.43142e+07	2.29092e+07	5.01222e+06	5.81111e+06	5.92876e+06	1.29593e+07	1.20722e+07	1.31476e+07	4.89973e+07	4.34176e+07	4.54628e+07	8.30143e+06	8.23384e+06	8.4617e+06	4.39962e+07	4.66827e+07	4.50117e+07	1.91862e+07	1.88223e+07	1.87966e+07	1.48418e+07	1.67897e+07	1.63247e+07
241	AcCa(24:0)	C31H61NO4	511.46	2.606	pos	1.24998e+06	1.2246e+06	1.18176e+06	1.22088e+06	1.32926e+06	1.04725e+06	1.66199e+06	1.49482e+06	1.5252e+06	1.64406e+06	1.66185e+06	1.58193e+06	1.10152e+06	898642	980609	884333	995433	1.03829e+06	1.10536e+06	1.23047e+06	1.04491e+06	1.77304e+06	1.69511e+06	1.48645e+06	1.43584e+06	1.30947e+06	1.31734e+06	1.23265e+06	1.23598e+06	1.31659e+06
242	AcCa(22:5)	C29H47NO4	473.35	1.499	pos	350113	456902	460327	407826	412350	457899	401917	380257	434088	381582	394364	384277	188059	210188	198746	269127	236707	251880	278937	243944	190951	514011	497438	546872	1.06525e+06	1.13828e+06	1.2615e+06	1.29093e+06	996946	1.32491e+06
243	AcCa(22:4)	C29H49NO4	475.366	1.692	pos	504668	455381	496361	447611	526320	607978	408153	408975	392866	391125	315700	367882	112353	124642	130350	192700	186013	196883	139643	170080	128606	338503	358426	367146	1.09256e+06	1.10565e+06	1.14904e+06	992120	907905	940587
244	AcCa(20:5)	C27H43NO4	445.319	1.198	pos	327071	314734	366928	343853	341521	352356	304623	349687	374340	394234	374248	338521	255419	293650	241029	311216	300531	285112	540489	599619	597122	886628	901883	873429	614712	651187	623697	535547	502540	561918
245	AcCa(20:4)	C27H45NO4	447.334	1.424	pos	2.05401e+06	2.20247e+06	2.36017e+06	2.12621e+06	2.1816e+06	2.4528e+06	1.8846e+06	2.13117e+06	1.87378e+06	2.02969e+06	1.97437e+06	2.34214e+06	1.2879e+06	1.17131e+06	1.16005e+06	1.21633e+06	1.33832e+06	1.30601e+06	779322	998556	1.01867e+06	1.84672e+06	1.95379e+06	1.65643e+06	3.14927e+06	2.91048e+06	3.09777e+06	2.66739e+06	2.52805e+06	2.7467e+06
246	AcCa(20:3)	C27H47NO4	449.35	1.558	pos	1.447e+06	1.80357e+06	1.50623e+06	1.55818e+06	1.67191e+06	1.62204e+06	1.50119e+06	1.528e+06	1.7677e+06	1.50544e+06	1.4921e+06	1.38661e+06	712829	827663	860145	997260	912864	1.11134e+06	677572	765852	814690	1.63519e+06	1.64283e+06	1.53383e+06	3.668e+06	4.23662e+06	3.98574e+06	2.80341e+06	3.5846e+06	3.91256e+06
247	AcCa(20:2)	C27H49NO4	451.366	1.739	pos	2.40831e+06	2.24125e+06	2.60853e+06	2.77163e+06	2.53891e+06	2.50965e+06	2.67522e+06	2.32572e+06	3.01316e+06	2.21122e+06	2.51015e+06	2.42701e+06	873690	888598	985780	1.31219e+06	1.26576e+06	1.33161e+06	825495	859100	812717	2.04166e+06	2.11233e+06	2.12119e+06	6.23127e+06	5.92179e+06	5.86412e+06	4.93857e+06	5.04042e+06	5.55059e+06
248	AcCa(20:1)	C27H51NO4	453.381	1.946	pos	3.26134e+06	3.15172e+06	3.76732e+06	3.79154e+06	4.05672e+06	3.86546e+06	3.37486e+06	3.35537e+06	3.67205e+06	3.02653e+06	3.12672e+06	3.75245e+06	1.93257e+06	1.867e+06	1.83238e+06	2.73476e+06	2.81469e+06	2.99338e+06	1.36e+06	1.47762e+06	1.37507e+06	3.34535e+06	3.77181e+06	3.58467e+06	5.68965e+06	5.5131e+06	5.84201e+06	5.076e+06	5.58608e+06	5.34533e+06
249	AcCa(20:0)	C27H53NO4	455.397	2.164	pos	842520	850845	978247	951816	1.07185e+06	862751	698156	837707	659635	707197	849543	849448	548611	638182	643738	667760	665373	736087	344542	441561	466260	708150	894494	700606	1.03802e+06	1.00441e+06	1.1795e+06	1.09219e+06	1.14049e+06	1.04292e+06
250	AcCa(19:0)	C26H51NO4	441.382	2.035	pos	400341	433761	420430	411134	444292	390765	374851	125656	394455	348368	345333	426432	322440	234766	236071	360826	323876	317066	168200	173629	185190	415119	336684	440339	270997	386630	409126	314217	374680	277447
251	AcCa(18:3)	C25H43NO4	421.319	1.196	pos	1.24569e+06	1.28832e+06	1.34653e+06	1.23477e+06	1.39274e+06	1.32103e+06	1.7171e+06	1.70521e+06	1.67496e+06	1.35528e+06	1.29562e+06	1.30805e+06	1.25196e+06	1.25868e+06	1.18663e+06	1.12069e+06	1.2995e+06	1.25579e+06	1.14777e+06	1.1319e+06	1.07272e+06	1.7557e+06	1.97608e+06	1.8865e+06	2.01366e+06	1.94089e+06	2.04307e+06	1.74857e+06	1.72559e+06	1.76379e+06
252	AcCa(18:2)	C25H45NO4	423.334	1.424	pos	2.81759e+07	2.88177e+07	3.05338e+07	3.06208e+07	2.65454e+07	2.8693e+07	3.50788e+07	3.4579e+07	3.53852e+07	2.80291e+07	3.21314e+07	3.44468e+07	2.54628e+07	2.43135e+07	1.9208e+07	2.16098e+07	2.06167e+07	2.01064e+07	1.4035e+07	1.83063e+07	1.82989e+07	2.63646e+07	3.26764e+07	3.03642e+07	4.44432e+07	4.93665e+07	5.19544e+07	4.167e+07	4.65911e+07	3.85089e+07
253	AcCa(18:0)	C25H49NO4	427.366	2.758	pos	9.6447e+06	9.55802e+06	1.00917e+07	9.21631e+06	8.58573e+06	8.32757e+06	8.00677e+06	9.12661e+06	7.89163e+06	9.81264e+06	9.57634e+06	8.38883e+06	1.05555e+07	1.18194e+07	1.215e+07	1.32248e+07	1.46355e+07	1.26615e+07	1.06534e+07	1.16451e+07	1.15501e+07	1.49488e+07	1.49231e+07	1.45131e+07	1.39698e+07	1.41404e+07	1.43745e+07	1.50549e+07	1.44469e+07	1.4626e+07
254	AcCa(17:0)	C24H47NO4	413.35	2.309	pos	128696	134807	42356.7	78546.1	114236	106780	84187.6	128387	134213	148728	106520	142192	125228	116707	121491	199108	200517	109076	132133	87465.9	146134	216620	218538	170984	132687	188447	180316	211856	216479	266160
255	AcCa(16:1)	C23H43NO4	397.319	1.297	pos	2.99523e+06	2.2945e+06	3.01092e+06	3.2556e+06	3.42695e+06	2.56784e+06	2.63517e+06	3.93483e+06	3.64831e+06	1.87901e+06	2.26708e+06	2.49786e+06	1.45884e+06	1.70312e+06	1.38812e+06	2.49901e+06	2.47533e+06	2.58859e+06	1.44743e+06	1.45735e+06	1.72072e+06	3.80087e+06	3.65138e+06	3.05537e+06	3.75636e+06	3.94222e+06	4.46473e+06	3.88616e+06	3.75798e+06	3.64202e+06
256	AcCa(14:2)	C21H37NO4	367.272	0.663	pos	114587	148169	139674	215646	226499	214419	311299	319658	310090	78027.5	70987	64353.7	131854	124854	109409	341911	270584	397307	78132.4	78170.7	71953	480749	487515	430093	763064	782222	712885	764422	717785	763931
257	AcCa(12:0)	C19H37NO4	343.272	0.695	pos	216021	217874	229428	236954	234146	205027	386220	389746	373548	212092	228583	210535	167327	173899	157998	287486	244922	248467	106342	147345	127847	300244	321392	295182	580766	643573	652590	631101	716540	665169

## Sheet: Proteomics
RBCs result 20220530					1	2	3	4	5	6	7	8	9	10	11	12	13	14	15	16	17	18	19	20	21	22	23	24	25	26	27	28	29	30
#	Identified Proteins (878)	Accession Number	Alternate ID	Molecular Weight	Control	Control	Control	Control	Control	Control	Carrier	Carrier	Carrier	Carrier	Carrier	Carrier	LN	LN	LN	LN	LN	LN	LN	LN	LN	LN	LN	LN	LN	LN	LN	LN	LN	LN
1	Hemoglobin subunit beta OS=Homo sapiens OX=9606 GN=HBB PE=1 SV=2	P68871	HBB	16 kDa	2064	3141	3039	3188	3066	3088	3115	3114	3077	3169	3201	3092	3022	3001	2993	2983	2989	3035	3053	2940	3002	3061	2983	2967	2935	2594	2589	2586	2785	2808
2	Hemoglobin subunit alpha OS=Homo sapiens OX=9606 GN=HBA1 PE=1 SV=2	P69905	HBA1	15 kDa	1915	2653	2593	2682	2647	2598	2526	2529	2531	2580	2620	2587	2498	2427	2440	2351	2385	2438	2453	2392	2420	2458	2477	2408	2431	2265	2221	2169	2263	2226
3	Hemoglobin subunit delta OS=Homo sapiens OX=9606 GN=HBD PE=1 SV=2	P02042	HBD	16 kDa	1197	1657	1583	1684	1634	1615	1646	1648	1643	1726	1735	1669	1622	1607	1617	1610	1608	1609	1597	1531	1575	1595	1588	1605	1561	1375	1401	1370	1453	1500
4	Carbonic anhydrase 1 OS=Homo sapiens OX=9606 GN=CA1 PE=1 SV=2	P00915	CA1	29 kDa	448	542	499	503	514	522	563	585	565	586	608	616	537	589	561	523	541	548	443	450	417	485	493	481	365	301	329	283	268	299
5	Albumin OS=Homo sapiens OX=9606 GN=ALB PE=1 SV=2	P02768	ALB	69 kDa	565	556	586	462	469	495	559	551	549	337	376	379	898	898	945	751	757	739	806	796	815	685	732	675	1274	1316	1355	1436	1428	1545
6	Spectrin alpha chain, erythrocytic 1 OS=Homo sapiens OX=9606 GN=SPTA1 PE=1 SV=5	P02549	SPTA1	280 kDa	519	544	520	480	501	463	535	527	534	565	548	531	486	512	512	536	518	533	514	488	485	596	659	609	515	510	500	496	486	497
7	Spectrin beta chain, erythrocytic OS=Homo sapiens OX=9606 GN=SPTB PE=1 SV=5	P11277	SPTB	246 kDa	768	501	505	478	462	485	511	526	499	483	526	511	459	455	459	467	467	494	469	491	447	563	635	562	504	498	487	470	485	514
8	Ankyrin-1 OS=Homo sapiens OX=9606 GN=ANK1 PE=1 SV=3	P16157	ANK1	206 kDa	305	316	313	323	303	324	334	329	332	336	376	386	334	338	355	290	324	327	344	341	332	398	435	394	399	373	379	353	346	370
9	Band 3 anion transport protein OS=Homo sapiens OX=9606 GN=SLC4A1 PE=1 SV=3	P02730	SLC4A1	102 kDa	264	283	274	285	313	315	284	270	261	339	357	338	299	304	297	257	264	284	296	305	312	290	300	290	330	328	314	274	274	309
10	Catalase OS=Homo sapiens OX=9606 GN=CAT PE=1 SV=3	P04040	CAT	60 kDa	213	226	225	225	226	203	255	236	245	225	243	245	232	240	231	242	230	244	219	220	225	232	233	236	226	227	234	227	205	225
11	Actin, cytoplasmic 1 OS=Homo sapiens OX=9606 GN=ACTB PE=1 SV=1	P60709	ACTB	42 kDa	425	160	165	142	139	130	218	224	215	131	145	140	185	173	186	226	244	240	174	174	159	242	291	248	182	153	162	160	169	166
12	Peroxiredoxin-2 OS=Homo sapiens OX=9606 GN=PRDX2 PE=1 SV=5	P32119	PRDX2	22 kDa	184	188	186	154	178	178	187	189	195	167	162	172	180	171	185	199	196	197	164	180	166	224	230	216	193	164	180	169	171	185
13	Carbonic anhydrase 2 OS=Homo sapiens OX=9606 GN=CA2 PE=1 SV=2	P00918	CA2	29 kDa	163	175	177	149	158	156	183	172	182	169	167	172	150	150	161	178	169	183	174	150	157	177	206	202	121	131	131	127	137	130
14	Hemoglobin subunit gamma-1 OS=Homo sapiens OX=9606 GN=HBG1 PE=1 SV=2	P69891	HBG1	16 kDa	183	232	227	222	207	212	171	171	148	164	154	153	216	227	220	224	239	231	413	442	481	471	474	481	1060	1344	1297	1169	1203	1231
15	Flavin reductase (NADPH) OS=Homo sapiens OX=9606 GN=BLVRB PE=1 SV=3	P30043	BLVRB	22 kDa	156	172	170	141	135	133	166	178	162	146	155	132	156	140	147	168	171	185	138	147	158	189	186	188	178	191	182	190	168	194
16	Myosin-9 OS=Homo sapiens OX=9606 GN=MYH9 PE=1 SV=4	P35579	MYH9	227 kDa	79	79	75	75	64	72	156	149	155	30	38	39	123	115	126	196	194	207	108	98	106	167	188	190	98	96	94	85	78	87
17	Filamin-A OS=Homo sapiens OX=9606 GN=FLNA PE=1 SV=4	P21333	FLNA	281 kDa	59	71	56	53	58	53	145	145	130	24	16	21	95	90	107	153	179	163	86	90	79	148	170	169	81	79	75	73	66	65
18	Glyceraldehyde-3-phosphate dehydrogenase OS=Homo sapiens OX=9606 GN=GAPDH PE=1 SV=3	P04406	GAPDH	36 kDa	114	131	137	124	118	127	139	128	122	136	150	134	160	179	190	173	166	187	182	178	190	213	216	237	169	151	141	151	154	161
19	Complement C3 OS=Homo sapiens OX=9606 GN=C3 PE=1 SV=2	P01024	C3	187 kDa	151	147	137	108	113	102	134	124	119	68	75	71	256	241	237	201	219	197	199	203	204	161	191	160	299	287	293	302	289	319
20	Protein 4.1 OS=Homo sapiens OX=9606 GN=EPB41 PE=1 SV=4	P11171	EPB41	97 kDa	102	114	119	103	126	100	109	112	102	114	120	121	114	117	112	85	91	113	103	97	112	102	125	126	102	99	109	110	100	101
21	Serotransferrin OS=Homo sapiens OX=9606 GN=TF PE=1 SV=3	P02787	TF	77 kDa	125	126	126	92	90	100	106	107	113	59	63	59	172	189	182	160	177	160	161	142	155	152	154	155	185	188	182	223	212	234
22	Hemoglobin subunit epsilon OS=Homo sapiens OX=9606 GN=HBE1 PE=1 SV=2	P02100	HBE1	16 kDa	66	0	0	98	95	83	101	99	90	0	102	0	97	97	101	98	0	99	0	95	99	107	97	100	177	170	161	146	152	168
23	Talin-1 OS=Homo sapiens OX=9606 GN=TLN1 PE=1 SV=3	Q9Y490	TLN1	270 kDa	45	38	43	34	31	28	100	104	98	14	11	16	63	73	70	121	127	146	58	48	44	103	142	116	66	61	59	44	51	47
24	Immunoglobulin kappa constant OS=Homo sapiens OX=9606 GN=IGKC PE=1 SV=2	P01834	IGKC	12 kDa	69	80	78	63	62	0	98	86	79	54	49	58	0	0	94	72	72	76	71	78	76	0	0	0	0	61	51	75	0	0
25	Immunoglobulin kappa light chain OS=Homo sapiens OX=9606 PE=1 SV=1	P0DOX7		23 kDa	68	77	73	60	61	66	94	74	75	53	48	57	84	87	85	68	70	71	68	75	72	48	39	43	49	59	48	72	69	73
26	Protein 4.2 OS=Homo sapiens OX=9606 GN=EPB42 PE=1 SV=3	P16452	EPB42	77 kDa	81	90	90	81	85	84	91	95	88	84	87	94	89	86	99	81	86	84	97	86	87	96	101	98	112	99	107	88	90	99
27	Methanethiol oxidase OS=Homo sapiens OX=9606 GN=SELENBP1 PE=1 SV=2	Q13228	SELENBP1	52 kDa	88	93	91	85	87	95	89	92	90	89	97	98	87	101	96	104	88	99	115	129	127	130	139	115	160	161	165	136	133	139
28	Actin, alpha cardiac muscle 1 OS=Homo sapiens OX=9606 GN=ACTC1 PE=1 SV=1	P68032	ACTC1	42 kDa	66	53	72	40	42	0	89	95	97	41	51	45	54	49	63	92	91	83	51	49	41	0	125	109	0	0	49	48	45	50
29	Fructose-bisphosphate aldolase A OS=Homo sapiens OX=9606 GN=ALDOA PE=1 SV=2	P04075	ALDOA	39 kDa	67	66	57	62	61	59	79	80	80	57	64	65	76	68	72	83	87	77	70	70	66	93	99	85	75	94	74	71	74	65
30	Alpha-2-macroglobulin OS=Homo sapiens OX=9606 GN=A2M PE=1 SV=3	P01023	A2M	163 kDa	92	81	83	59	55	62	76	58	57	36	44	38	272	269	308	200	219	233	227	230	207	172	201	200	345	328	331	371	381	402
31	Apolipoprotein B-100 OS=Homo sapiens OX=9606 GN=APOB PE=1 SV=2	P04114	APOB	516 kDa	75	74	78	51	49	50	72	61	66	27	32	28	156	167	157	110	127	114	136	138	124	80	107	91	224	223	210	236	234	232
32	Fibrinogen beta chain OS=Homo sapiens OX=9606 GN=FGB PE=1 SV=2	P02675	FGB	56 kDa	83	93	71	58	47	49	70	66	65	24	31	21	124	117	117	124	120	119	107	97	94	105	95	101	108	114	112	97	116	110
33	Peroxiredoxin-6 OS=Homo sapiens OX=9606 GN=PRDX6 PE=1 SV=3	P30041	PRDX6	25 kDa	70	78	72	73	68	67	70	77	72	69	75	86	63	63	73	63	68	55	64	81	72	71	76	93	60	75	78	82	82	71
34	Alpha-1-antitrypsin OS=Homo sapiens OX=9606 GN=SERPINA1 PE=1 SV=3	P01009	SERPINA1	47 kDa	99	105	93	82	77	83	68	68	72	47	40	43	154	166	151	110	124	132	164	167	147	119	126	119	157	146	163	171	181	175
35	Purine nucleoside phosphorylase OS=Homo sapiens OX=9606 GN=PNP PE=1 SV=2	P00491	PNP	32 kDa	71	65	65	67	71	79	68	54	70	68	81	71	78	80	79	73	71	80	67	80	70	92	91	69	77	77	72	69	70	68
36	Delta-aminolevulinic acid dehydratase OS=Homo sapiens OX=9606 GN=ALAD PE=1 SV=1	P13716	ALAD	36 kDa	62	66	63	61	69	62	66	73	64	60	84	67	86	91	86	74	77	91	67	77	75	82	82	83	84	84	83	79	79	79
37	Heat shock cognate 71 kDa protein OS=Homo sapiens OX=9606 GN=HSPA8 PE=1 SV=1	P11142	HSPA8	71 kDa	55	42	49	40	40	46	64	60	57	53	51	43	47	43	50	55	55	64	50	47	51	73	84	78	74	61	56	64	58	60
38	Fibrinogen gamma chain OS=Homo sapiens OX=9606 GN=FGG PE=1 SV=3	P02679	FGG	52 kDa	77	80	71	58	57	63	63	76	59	36	35	34	126	109	122	104	111	104	105	107	98	82	108	105	112	122	114	107	116	117
39	Apolipoprotein A-I OS=Homo sapiens OX=9606 GN=APOA1 PE=1 SV=1	P02647	APOA1	31 kDa	62	57	64	46	43	42	61	53	58	32	31	35	57	63	68	54	66	64	58	69	52	59	57	68	94	92	89	90	96	108
40	Immunoglobulin gamma-1 heavy chain OS=Homo sapiens OX=9606 PE=1 SV=2	P0DOX5	P0DOX5	49 kDa	62	54	66	56	53	54	60	55	54	41	42	37	93	93	94	76	72	85	72	64	77	50	47	50	79	71	77	82	81	87
41	Bisphosphoglycerate mutase OS=Homo sapiens OX=9606 GN=BPGM PE=1 SV=2	P07738	BPGM	30 kDa	62	58	62	53	63	59	59	62	61	54	61	67	60	52	59	63	54	55	45	58	56	80	91	68	64	62	52	50	40	53
42	Phosphoglycerate kinase 1 OS=Homo sapiens OX=9606 GN=PGK1 PE=1 SV=3	P00558	PGK1	45 kDa	54	61	50	38	41	42	56	49	47	47	49	51	60	63	64	57	64	66	59	60	65	87	86	83	66	64	67	60	59	78
43	L-lactate dehydrogenase B chain OS=Homo sapiens OX=9606 GN=LDHB PE=1 SV=2	P07195	LDHB	37 kDa	43	43	42	35	44	48	54	49	45	54	42	43	48	50	51	40	37	41	53	44	48	62	61	55	55	58	67	42	39	47
44	Peroxiredoxin-1 OS=Homo sapiens OX=9606 GN=PRDX1 PE=1 SV=1	Q06830	PRDX1	22 kDa	49	55	41	32	42	46	53	55	49	45	55	53	64	61	59	55	60	59	50	65	53	70	67	60	53	43	50	54	49	53
45	Immunoglobulin heavy constant gamma 3 OS=Homo sapiens OX=9606 GN=IGHG3 PE=1 SV=2	P01860	IGHG3	41 kDa	33	33	43	28	32	28	53	54	45	32	31	21	67	65	67	47	41	42	45	42	40	27	25	27	59	52	58	54	54	61
46	Solute carrier family 2, facilitated glucose transporter member 1 OS=Homo sapiens OX=9606 GN=SLC2A1 PE=1 SV=2	P11166	SLC2A1	54 kDa	45	59	49	62	50	57	50	54	62	46	41	51	59	54	66	56	53	56	61	50	65	73	72	67	45	63	48	56	49	49
47	Aldehyde dehydrogenase 1A1 OS=Homo sapiens OX=9606 GN=ALDH1A1 PE=1 SV=2	P00352	ALDH1A1	55 kDa	53	61	57	48	52	57	50	56	55	46	51	60	57	52	60	55	52	49	48	39	51	38	52	45	57	47	55	38	47	45
48	Fibrinogen alpha chain OS=Homo sapiens OX=9606 GN=FGA PE=1 SV=2	P02671	FGA	95 kDa	62	66	63	39	46	38	49	49	44	26	29	28	76	68	78	73	67	67	67	67	62	65	98	68	84	83	80	83	77	89
49	Transitional endoplasmic reticulum ATPase OS=Homo sapiens OX=9606 GN=VCP PE=1 SV=4	P55072	VCP	89 kDa	52	72	45	63	61	65	48	36	42	54	65	51	65	63	63	55	57	57	74	65	74	63	75	70	77	84	77	63	66	72
50	Rab GDP dissociation inhibitor beta OS=Homo sapiens OX=9606 GN=GDI2 PE=1 SV=2	P50395	GDI2	51 kDa	44	44	38	47	42	45	46	46	44	44	48	41	53	48	49	41	43	51	48	52	45	55	63	51	43	52	52	39	41	33
51	Haptoglobin OS=Homo sapiens OX=9606 GN=HP PE=1 SV=1	P00738	HP	45 kDa	95	98	96	69	63	55	45	48	54	20	23	16	135	137	151	115	111	107	117	113	125	99	120	97	64	62	70	87	95	84
52	Beta-adducin OS=Homo sapiens OX=9606 GN=ADD2 PE=1 SV=3	P35612	ADD2	81 kDa	38	38	40	48	41	43	44	45	48	55	59	47	42	44	39	33	39	35	50	50	47	41	37	42	42	53	44	45	46	52
53	Alpha-enolase OS=Homo sapiens OX=9606 GN=ENO1 PE=1 SV=2	P06733	ENO1	47 kDa	29	32	23	28	30	28	44	39	39	35	36	32	42	44	40	35	41	46	42	38	34	54	57	54	48	41	42	54	48	52
54	Cofilin-1 OS=Homo sapiens OX=9606 GN=CFL1 PE=1 SV=3	P23528	CFL1	19 kDa	25	22	25	21	23	28	44	36	38	31	35	31	28	34	37	33	31	37	34	33	36	36	39	40	44	47	48	54	41	45
55	Lactotransferrin OS=Homo sapiens OX=9606 GN=LTF PE=1 SV=6	P02788	LTF	78 kDa	11	16	14	14	18	10	42	44	39	3	0	0	27	26	27	40	39	52	29	29	32	53	56	54	17	16	26	16	10	13
56	Triosephosphate isomerase OS=Homo sapiens OX=9606 GN=TPI1 PE=1 SV=4	P60174	TPI1	27 kDa	45	46	42	36	34	34	41	45	56	38	43	45	39	45	36	52	48	53	34	46	47	63	65	63	47	52	46	41	39	40
57	Stomatin OS=Homo sapiens OX=9606 GN=STOM PE=1 SV=3	P27105	STOM	32 kDa	43	50	39	38	40	35	40	51	40	40	44	37	38	32	30	39	38	50	33	32	30	49	56	51	35	43	42	38	38	38
58	Tropomyosin alpha-3 chain OS=Homo sapiens OX=9606 GN=TPM3 PE=1 SV=2	P06753	TPM3	33 kDa	38	35	38	36	32	33	40	43	40	38	34	30	30	32	36	42	42	43	31	35	35	42	45	38	26	31	25	40	28	24
59	14-3-3 protein epsilon OS=Homo sapiens OX=9606 GN=YWHAE PE=1 SV=1	P62258	YWHAE	29 kDa	32	29	31	39	36	40	38	39	40	38	47	48	51	52	48	38	41	46	47	44	40	38	47	42	40	41	36	35	43	39
60	Tropomyosin alpha-4 chain OS=Homo sapiens OX=9606 GN=TPM4 PE=1 SV=3	P67936	TPM4	29 kDa	32	28	36	22	21	21	38	43	38	19	17	16	30	27	32	39	42	48	23	22	27	46	49	43	17	19	16	29	21	18
61	Dematin OS=Homo sapiens OX=9606 GN=DMTN PE=1 SV=3	Q08495	DMTN	46 kDa	40	31	35	30	32	32	37	32	34	30	29	29	28	21	26	30	28	30	23	21	24	29	41	32	21	28	28	26	23	30
62	Clathrin heavy chain 1 OS=Homo sapiens OX=9606 GN=CLTC PE=1 SV=5	Q00610	CLTC	192 kDa	22	14	17	28	26	24	36	50	37	45	48	36	40	30	41	32	28	30	57	64	54	45	44	57	39	42	33	37	36	27
63	Nucleoside diphosphate kinase A OS=Homo sapiens OX=9606 GN=NME1 PE=1 SV=1	P15531	NME1	17 kDa	52	41	38	41	42	46	36	36	41	43	43	42	45	52	35	40	37	34	48	43	42	46	34	35	39	40	39	41	42	41
64	Immunoglobulin lambda constant 3 OS=Homo sapiens OX=9606 GN=IGLC3 PE=1 SV=1	P0DOY3	IGLC3	11 kDa	34	39	43	31	31	33	36	38	42	19	22	21	42	43	39	44	43	45	36	39	33	33	38	38	26	30	32	36	33	31
65	Transketolase OS=Homo sapiens OX=9606 GN=TKT PE=1 SV=3	P29401	TKT	68 kDa	36	35	39	41	41	40	36	36	30	30	33	38	41	32	40	37	35	40	33	35	40	44	38	44	30	28	34	28	26	27
66	Nucleoside diphosphate kinase B OS=Homo sapiens OX=9606 GN=NME2 PE=1 SV=1	P22392	NME2	17 kDa	41	36	34	33	35	35	36	32	36	37	40	36	45	43	34	33	39	40	44	39	37	37	36	35	29	35	30	30	34	37
67	Glutamate--cysteine ligase catalytic subunit OS=Homo sapiens OX=9606 GN=GCLC PE=1 SV=2	P48506	GCLC	73 kDa	33	32	32	39	43	40	35	40	28	37	49	48	36	36	48	34	40	35	32	32	39	43	43	38	47	49	62	57	57	55
68	Tropomyosin alpha-1 chain OS=Homo sapiens OX=9606 GN=TPM1 PE=1 SV=2	P09493	TPM1	33 kDa	34	29	40	26	24	26	35	35	34	25	21	25	27	24	29	36	32	45	23	21	27	38	41	38	18	19	14	29	20	19
69	Thrombospondin-1 OS=Homo sapiens OX=9606 GN=THBS1 PE=1 SV=2	P07996	THBS1	129 kDa	7	4	5	9	5	5	35	29	23	4	3	2	19	30	23	32	26	27	20	25	19	29	25	24	22	21	24	11	16	10
70	ATP-citrate synthase OS=Homo sapiens OX=9606 GN=ACLY PE=1 SV=3	P53396	ACLY	121 kDa	40	38	30	29	28	35	34	35	35	37	34	37	45	45	48	39	32	41	53	35	40	49	58	49	64	69	65	51	58	48
71	Immunoglobulin heavy constant gamma 2 OS=Homo sapiens OX=9606 GN=IGHG2 PE=1 SV=2	P01859	IGHG2	36 kDa	26	25	32	19	0	14	34	33	30	0	10	0	23	26	24	26	23	23	20	20	17	15	13	17	28	29	23	29	23	29
72	Alpha-actinin-1 OS=Homo sapiens OX=9606 GN=ACTN1 PE=1 SV=2	P12814	ACTN1	103 kDa	11	9	8	13	10	13	34	37	34	2	3	3	28	21	26	40	42	45	21	20	18	29	45	36	22	37	28	19	17	28
73	Spectrin beta chain, non-erythrocytic 1 OS=Homo sapiens OX=9606 GN=SPTBN1 PE=1 SV=2	Q01082	SPTBN1	275 kDa	0	0	40	0	0	29	34	0	0	27	0	0	0	0	32	0	38	0	28	36	0	49	0	43	0	0	0	0	0	0
74	Heat shock protein HSP 90-alpha OS=Homo sapiens OX=9606 GN=HSP90AA1 PE=1 SV=5	P07900	HSP90AA1	85 kDa	30	33	26	28	29	24	33	35	32	30	29	23	38	40	31	32	34	34	26	28	29	35	38	39	37	49	35	35	39	39
75	Peptidyl-prolyl cis-trans isomerase A OS=Homo sapiens OX=9606 GN=PPIA PE=1 SV=2	P62937	PPIA	18 kDa	33	30	31	19	27	26	33	30	31	27	27	28	27	33	28	28	35	37	28	23	30	44	39	44	34	34	36	29	25	32
76	Flotillin-1 OS=Homo sapiens OX=9606 GN=FLOT1 PE=1 SV=3	O75955	FLOT1	47 kDa	25	31	25	32	29	28	33	28	24	28	37	29	31	32	32	34	32	37	31	24	32	29	35	30	33	33	44	35	32	31
77	Hydroxyacylglutathione hydrolase, mitochondrial OS=Homo sapiens OX=9606 GN=HAGH PE=1 SV=2	Q16775	HAGH	34 kDa	22	20	24	26	30	25	33	23	24	28	29	23	28	26	32	35	24	30	26	31	26	25	28	29	25	28	27	23	32	29
78	Alpha-adducin OS=Homo sapiens OX=9606 GN=ADD1 PE=1 SV=2	P35611	ADD1	81 kDa	40	32	37	30	31	35	32	38	28	39	37	35	37	43	34	27	31	32	38	25	31	36	29	35	30	32	38	43	38	34
79	Acylamino-acid-releasing enzyme OS=Homo sapiens OX=9606 GN=APEH PE=1 SV=4	P13798	APEH	81 kDa	30	33	28	34	31	27	32	35	28	37	39	36	36	42	42	22	32	36	39	41	30	33	32	32	47	35	46	32	25	34
80	Parkinson disease protein 7 OS=Homo sapiens OX=9606 GN=PARK7 PE=1 SV=2	Q99497	PARK7	20 kDa	30	25	33	33	22	29	31	22	34	32	43	37	41	31	37	33	25	29	31	27	27	34	35	39	34	35	35	30	33	40
81	Alpha-synuclein OS=Homo sapiens OX=9606 GN=SNCA PE=1 SV=1	P37840	SNCA	14 kDa	29	32	30	34	30	29	31	30	32	34	36	32	27	30	35	31	34	37	35	31	34	31	37	37	36	41	41	44	43	41
82	Immunoglobulin heavy constant mu OS=Homo sapiens OX=9606 GN=IGHM PE=1 SV=4	P01871	IGHM	49 kDa	18	17	15	10	10	12	31	23	20	12	15	16	48	42	41	32	37	42	37	37	28	30	29	32	38	36	40	37	40	45
83	Ubiquitin-40S ribosomal protein S27a OS=Homo sapiens OX=9606 GN=RPS27A PE=1 SV=2	P62979	RPS27A	18 kDa	33	41	49	26	40	25	30	32	27	39	41	34	43	40	33	36	46	44	36	39	48	50	67	56	24	24	23	25	16	23
84	Carbonic anhydrase 3 OS=Homo sapiens OX=9606 GN=CA3 PE=1 SV=3	P07451	CA3	30 kDa	28	29	24	17	23	17	30	34	34	39	36	37	25	30	34	27	22	27	19	22	25	19	22	20	34	25	34	26	25	28
85	ATP-dependent 6-phosphofructokinase, liver type OS=Homo sapiens OX=9606 GN=PFKL PE=1 SV=6	P17858	PFKL	85 kDa	22	18	20	20	25	25	30	20	24	26	26	23	27	22	15	20	19	24	18	23	22	23	30	25	27	31	30	27	25	36
86	Histone H4 OS=Homo sapiens OX=9606 GN=H4C1 PE=1 SV=2	P62805	H4C1	11 kDa	14	12	11	10	10	10	30	29	28	2	2	0	12	13	10	26	29	25	14	13	9	36	32	37	17	20	16	7	11	12
87	Ceruloplasmin OS=Homo sapiens OX=9606 GN=CP PE=1 SV=1	P00450	CP	122 kDa	43	46	40	32	36	34	29	23	29	7	12	11	83	95	89	61	64	73	62	81	59	50	59	55	85	70	78	70	75	78
88	Superoxide dismutase [Cu-Zn] OS=Homo sapiens OX=9606 GN=SOD1 PE=1 SV=2	P00441	SOD1	16 kDa	44	37	43	30	39	31	29	42	36	35	28	24	39	27	31	34	34	32	30	32	23	39	39	49	31	29	29	38	31	34
89	T-complex protein 1 subunit beta OS=Homo sapiens OX=9606 GN=CCT2 PE=1 SV=4	P78371	CCT2	57 kDa	22	25	27	23	24	25	29	25	31	25	30	31	28	24	27	26	29	31	23	26	22	31	35	37	36	41	33	31	32	41
90	Protein DDI1 homolog 2 OS=Homo sapiens OX=9606 GN=DDI2 PE=1 SV=1	Q5TDH0	DDI2	45 kDa	26	22	23	23	16	17	29	19	20	20	18	22	31	38	24	23	27	29	21	26	25	28	30	29	26	27	25	18	17	24
91	Bifunctional purine biosynthesis protein ATIC OS=Homo sapiens OX=9606 GN=ATIC PE=1 SV=3	P31939	ATIC	65 kDa	17	23	14	26	28	27	28	21	23	40	29	34	34	35	39	26	30	29	34	37	29	33	30	32	44	41	49	32	31	38
92	Ribose-phosphate pyrophosphokinase 1 OS=Homo sapiens OX=9606 GN=PRPS1 PE=1 SV=2	P60891	PRPS1	35 kDa	25	25	24	29	25	25	28	23	26	31	25	31	29	26	24	25	22	28	27	25	22	28	35	33	26	28	30	32	25	33
93	Protein-glutamine gamma-glutamyltransferase 2 OS=Homo sapiens OX=9606 GN=TGM2 PE=1 SV=2	P21980	TGM2	77 kDa	30	29	45	26	29	30	28	40	36	42	48	39	26	24	24	27	23	22	25	21	29	27	26	25	14	12	17	10	13	13
94	Adenosylhomocysteinase OS=Homo sapiens OX=9606 GN=AHCY PE=1 SV=4	P23526	AHCY	48 kDa	26	21	25	21	24	22	28	25	27	30	32	30	26	20	22	32	28	25	24	29	27	31	39	30	33	28	35	25	30	29
95	Phosphatidylethanolamine-binding protein 1 OS=Homo sapiens OX=9606 GN=PEBP1 PE=1 SV=3	P30086	PEBP1	21 kDa	25	23	21	24	30	23	28	23	23	23	25	27	20	24	23	21	23	25	27	19	20	24	28	28	26	24	30	17	19	23
96	Calpastatin OS=Homo sapiens OX=9606 GN=CAST PE=1 SV=4	P20810	CAST	77 kDa	27	28	24	30	33	36	27	24	26	31	37	34	33	29	24	20	23	27	34	27	29	27	24	21	33	38	36	42	37	42
97	Gelsolin OS=Homo sapiens OX=9606 GN=GSN PE=1 SV=1	P06396	GSN	86 kDa	19	21	23	19	19	19	27	33	29	8	15	9	29	29	26	33	35	39	17	17	18	26	28	26	24	29	28	30	32	33
98	Heat shock 70 kDa protein 1A OS=Homo sapiens OX=9606 GN=HSPA1A PE=1 SV=1	P0DMV8 (+1)	HSPA1A	70 kDa	26	26	24	21	19	22	27	28	24	26	20	22	24	24	28	33	30	29	25	22	20	30	35	34	25	23	23	19	20	21
99	Protein S100-A9 OS=Homo sapiens OX=9606 GN=S100A9 PE=1 SV=1	P06702	S100A9	13 kDa	22	21	21	20	20	20	27	33	23	3	8	5	23	16	15	27	26	33	17	26	21	31	38	38	8	10	7	9	10	15
100	Vinculin OS=Homo sapiens OX=9606 GN=VCL PE=1 SV=4	P18206	VCL	124 kDa	8	10	12	5	4	6	27	36	23	3	2	3	15	15	16	41	46	44	9	13	11	43	40	42	14	14	11	9	9	7
101	Cullin-associated NEDD8-dissociated protein 1 OS=Homo sapiens OX=9606 GN=CAND1 PE=1 SV=2	Q86VP6	CAND1	136 kDa	35	30	21	38	45	31	26	31	27	44	51	42	47	37	35	27	34	40	37	41	35	34	42	42	60	54	53	40	40	44
102	Ubiquitin-like modifier-activating enzyme 1 OS=Homo sapiens OX=9606 GN=UBA1 PE=1 SV=3	P22314	UBA1	118 kDa	19	16	21	17	26	24	26	25	30	35	30	32	33	34	37	25	25	23	28	20	20	21	29	27	40	37	42	31	34	37
103	T-complex protein 1 subunit theta OS=Homo sapiens OX=9606 GN=CCT8 PE=1 SV=4	P50990	CCT8	60 kDa	19	24	20	22	19	16	26	25	21	19	22	25	20	22	23	20	23	27	23	24	23	27	46	43	41	36	42	30	38	39
104	F-actin-capping protein subunit alpha-1 OS=Homo sapiens OX=9606 GN=CAPZA1 PE=1 SV=3	P52907	CAPZA1	33 kDa	20	20	21	15	19	19	26	20	20	17	21	21	21	19	17	22	21	19	21	22	23	18	21	24	17	23	21	18	14	14
105	GTP-binding nuclear protein Ran OS=Homo sapiens OX=9606 GN=RAN PE=1 SV=3	P62826	RAN	24 kDa	17	26	22	17	20	20	26	21	27	21	23	27	24	23	24	17	14	24	15	18	17	20	21	25	11	8	11	6	7	6
106	T-complex protein 1 subunit epsilon OS=Homo sapiens OX=9606 GN=CCT5 PE=1 SV=1	P48643	CCT5	60 kDa	18	22	25	31	21	24	25	28	26	23	22	26	20	30	28	31	29	30	23	32	23	30	39	38	32	33	30	35	33	31
107	Ubiquitin carboxyl-terminal hydrolase 14 OS=Homo sapiens OX=9606 GN=USP14 PE=1 SV=3	P54578	USP14	56 kDa	28	28	28	23	29	34	24	31	31	29	34	40	35	38	31	33	31	26	33	25	32	38	43	27	52	43	56	35	35	38
108	Moesin OS=Homo sapiens OX=9606 GN=MSN PE=1 SV=3	P26038	MSN	68 kDa	16	16	18	13	11	14	24	24	22	11	16	19	19	17	14	28	27	31	15	15	20	28	39	30	21	25	29	25	16	22
109	Eukaryotic translation initiation factor 5A-1 OS=Homo sapiens OX=9606 GN=EIF5A PE=1 SV=2	P63241	EIF5A	17 kDa	11	12	12	19	14	10	24	26	25	13	18	17	17	20	24	24	25	24	25	22	24	28	21	24	28	28	28	19	32	20
110	Alpha-soluble NSF attachment protein OS=Homo sapiens OX=9606 GN=NAPA PE=1 SV=3	P54920	NAPA	33 kDa	16	14	13	15	15	15	24	18	18	15	19	24	23	18	20	14	19	18	20	21	17	25	21	18	26	20	30	23	21	24
111	Fermitin family homolog 3 OS=Homo sapiens OX=9606 GN=FERMT3 PE=1 SV=1	Q86UX7	FERMT3	76 kDa	11	6	10	8	8	8	24	17	23	7	8	5	11	11	14	27	26	27	9	9	10	20	23	20	11	11	16	14	10	10
112	Beta-actin-like protein 2 OS=Homo sapiens OX=9606 GN=ACTBL2 PE=1 SV=2	Q562R1	ACTBL2	42 kDa	0	11	0	0	0	0	24	0	0	0	0	0	0	0	0	17	23	0	0	0	0	0	0	0	0	0	0	0	10	0
113	Hemoglobin subunit zeta OS=Homo sapiens OX=9606 GN=HBZ PE=1 SV=2	P02008	HBZ	16 kDa	0	0	0	0	0	0	23	21	24	24	23	19	0	0	0	0	0	0	28	18	24	24	23	21	46	44	46	38	37	46
114	Stress-induced-phosphoprotein 1 OS=Homo sapiens OX=9606 GN=STIP1 PE=1 SV=1	P31948	STIP1	63 kDa	25	19	20	23	26	21	23	26	26	29	43	30	39	37	41	27	31	34	30	43	35	38	31	33	35	41	30	38	41	37
115	Serine/threonine-protein phosphatase 2A 65 kDa regulatory subunit A alpha isoform OS=Homo sapiens OX=9606 GN=PPP2R1A PE=1 SV=4	P30153	PPP2R1A	65 kDa	21	18	18	19	22	25	23	18	19	25	34	26	26	31	34	21	21	22	34	31	32	32	32	27	34	36	32	28	25	30
116	Ribonuclease inhibitor OS=Homo sapiens OX=9606 GN=RNH1 PE=1 SV=2	P13489	RNH1	50 kDa	22	21	23	19	19	17	23	20	17	18	23	16	31	25	26	26	22	24	26	18	14	26	27	29	26	26	21	23	21	20
117	E3 ubiquitin-protein ligase RNF123 OS=Homo sapiens OX=9606 GN=RNF123 PE=1 SV=1	Q5XPI4	RNF123	149 kDa	14	11	12	15	11	14	23	12	25	17	19	18	16	19	21	19	15	28	20	19	16	17	19	11	29	22	21	19	18	13
118	L-lactate dehydrogenase A chain OS=Homo sapiens OX=9606 GN=LDHA PE=1 SV=2	P00338	LDHA	37 kDa	16	21	22	19	20	21	22	17	18	26	20	20	22	25	22	21	29	26	29	22	22	33	33	28	24	18	24	24	19	20
119	Pyruvate kinase PKLR OS=Homo sapiens OX=9606 GN=PKLR PE=1 SV=2	P30613	PKLR	62 kDa	19	18	23	21	21	21	22	22	24	20	18	20	20	20	22	21	20	22	22	19	16	27	26	26	21	22	25	25	22	17
120	WD repeat-containing protein 1 OS=Homo sapiens OX=9606 GN=WDR1 PE=1 SV=4	O75083	WDR1	66 kDa	11	9	10	13	13	15	22	20	18	14	14	12	15	12	17	14	14	20	17	20	16	16	29	18	24	23	23	12	18	19
121	Adenylosuccinate lyase OS=Homo sapiens OX=9606 GN=ADSL PE=1 SV=2	P30566	ADSL	55 kDa	21	23	26	26	23	21	21	28	26	30	24	24	27	30	30	24	22	31	18	23	22	27	34	29	27	30	32	28	23	32
122	Malate dehydrogenase, cytoplasmic OS=Homo sapiens OX=9606 GN=MDH1 PE=1 SV=4	P40925	MDH1	36 kDa	17	19	17	17	17	14	21	16	14	19	22	24	20	21	23	17	22	20	27	24	25	27	27	25	29	23	29	22	26	27
123	Heat shock protein HSP 90-beta OS=Homo sapiens OX=9606 GN=HSP90AB1 PE=1 SV=4	P08238	HSP90AB1	83 kDa	18	18	16	0	16	0	21	21	25	18	19	14	23	19	16	26	25	20	17	18	16	24	23	28	16	24	20	16	21	26
124	T-complex protein 1 subunit gamma OS=Homo sapiens OX=9606 GN=CCT3 PE=1 SV=4	P49368	CCT3	61 kDa	17	16	18	14	15	9	21	15	15	15	19	21	16	12	16	15	18	19	19	12	11	15	30	24	24	32	29	24	24	22
125	Tropomodulin-1 OS=Homo sapiens OX=9606 GN=TMOD1 PE=1 SV=1	P28289	TMOD1	41 kDa	16	17	14	21	20	19	21	20	22	17	21	14	19	15	20	21	20	24	22	22	22	22	22	20	20	22	19	15	15	15
126	Adenosine 5'-monophosphoramidase HINT1 OS=Homo sapiens OX=9606 GN=HINT1 PE=1 SV=2	P49773	HINT1	14 kDa	16	22	18	23	15	18	21	19	18	15	17	13	22	18	20	22	23	18	23	18	19	19	25	25	19	19	22	17	15	19
127	Triokinase/FMN cyclase OS=Homo sapiens OX=9606 GN=TKFC PE=1 SV=2	Q3LXA3	TKFC	59 kDa	22	18	17	10	12	10	21	15	15	19	14	12	16	18	17	16	14	20	18	13	14	18	17	14	19	20	12	23	16	19
128	Glutathione S-transferase omega-1 OS=Homo sapiens OX=9606 GN=GSTO1 PE=1 SV=2	P78417	GSTO1	28 kDa	23	24	21	19	16	19	20	24	25	22	23	25	21	20	19	19	18	20	22	21	23	31	33	24	34	27	31	32	26	24
129	Pyruvate kinase PKM OS=Homo sapiens OX=9606 GN=PKM PE=1 SV=4	P14618	PKM	58 kDa	7	8	7	9	6	9	20	16	18	0	0	2	10	12	15	19	34	25	13	13	7	28	33	26	6	11	9	7	8	11
130	Ubiquitin-conjugating enzyme E2 N OS=Homo sapiens OX=9606 GN=UBE2N PE=1 SV=1	P61088	UBE2N	17 kDa	15	11	12	9	9	11	20	14	15	10	9	12	13	11	13	14	14	14	11	10	10	10	13	13	9	7	8	11	10	8
131	Complement factor H OS=Homo sapiens OX=9606 GN=CFH PE=1 SV=4	P08603	CFH	139 kDa	24	21	20	10	14	18	19	16	17	5	8	10	43	48	46	29	38	50	39	44	37	21	23	24	52	58	60	64	56	59
132	Vitamin D-binding protein OS=Homo sapiens OX=9606 GN=GC PE=1 SV=2	P02774	GC	53 kDa	25	20	24	28	18	22	19	15	20	4	4	6	37	44	48	31	29	32	30	33	30	23	25	21	45	52	53	60	52	58
133	Tripeptidyl-peptidase 2 OS=Homo sapiens OX=9606 GN=TPP2 PE=1 SV=4	P29144	TPP2	138 kDa	12	18	16	18	18	19	19	15	18	25	24	24	21	18	18	12	15	16	19	19	18	16	19	16	34	36	30	22	24	27
134	Leukotriene A-4 hydrolase OS=Homo sapiens OX=9606 GN=LTA4H PE=1 SV=2	P09960	LTA4H	69 kDa	19	21	21	19	21	21	19	24	22	25	25	22	20	18	23	22	26	18	24	23	22	26	24	20	20	20	19	23	23	17
135	Phosphoglucomutase-2 OS=Homo sapiens OX=9606 GN=PGM2 PE=1 SV=4	Q96G03	PGM2	68 kDa	16	13	14	20	16	25	19	15	15	17	19	24	29	19	18	15	20	21	14	14	18	19	19	19	23	26	21	14	12	19
136	Protein argonaute-2 OS=Homo sapiens OX=9606 GN=AGO2 PE=1 SV=3	Q9UKV8	AGO2	97 kDa	17	16	14	12	14	17	19	21	16	17	24	24	18	19	14	9	16	11	15	20	13	18	13	13	23	18	24	17	16	14
137	14-3-3 protein zeta/delta OS=Homo sapiens OX=9606 GN=YWHAZ PE=1 SV=1	P63104	YWHAZ	28 kDa	15	16	15	7	7	8	19	17	15	10	17	13	19	19	17	19	24	25	11	20	18	29	37	26	19	16	13	13	11	13
138	Hsc70-interacting protein OS=Homo sapiens OX=9606 GN=ST13 PE=1 SV=2	P50502	ST13	41 kDa	18	22	17	15	12	11	19	18	20	18	13	12	14	12	14	25	21	13	14	12	13	24	30	22	16	12	18	14	14	13
139	Dipeptidyl peptidase 3 OS=Homo sapiens OX=9606 GN=DPP3 PE=1 SV=2	Q9NY33	DPP3	83 kDa	13	14	12	12	17	12	19	19	12	19	24	20	16	13	21	15	13	14	12	13	12	15	13	15	29	25	25	27	23	27
140	Myeloperoxidase OS=Homo sapiens OX=9606 GN=MPO PE=1 SV=1	P05164	MPO	84 kDa	13	8	8	5	7	8	19	14	19	0	0	0	6	8	10	15	14	16	14	13	12	27	28	25	14	17	14	11	9	12
141	Antithrombin-III OS=Homo sapiens OX=9606 GN=SERPINC1 PE=1 SV=1	P01008	SERPINC1	53 kDa	28	26	26	19	19	16	18	15	16	11	13	10	50	50	56	31	34	39	43	48	43	30	27	26	41	50	48	62	68	53
142	Hemopexin OS=Homo sapiens OX=9606 GN=HPX PE=1 SV=2	P02790	HPX	52 kDa	19	19	16	19	21	12	18	16	11	8	8	8	38	38	39	30	25	37	36	33	36	36	25	29	43	38	45	48	39	41
143	Transthyretin OS=Homo sapiens OX=9606 GN=TTR PE=1 SV=1	P02766	TTR	16 kDa	21	24	22	19	22	24	18	20	20	16	12	19	26	22	32	23	17	22	28	24	26	27	22	15	26	37	33	34	29	28
144	T-complex protein 1 subunit delta OS=Homo sapiens OX=9606 GN=CCT4 PE=1 SV=4	P50991	CCT4	58 kDa	21	17	15	12	15	12	18	21	17	12	15	16	21	19	21	19	22	18	20	20	18	20	30	24	35	27	26	28	32	32
145	Thioredoxin OS=Homo sapiens OX=9606 GN=TXN PE=1 SV=3	P10599	TXN	12 kDa	12	17	16	17	12	13	18	11	17	17	17	23	26	28	34	12	16	17	21	27	22	13	23	21	35	33	34	33	39	36
146	PITH domain-containing protein 1 OS=Homo sapiens OX=9606 GN=PITHD1 PE=1 SV=1	Q9GZP4	PITHD1	24 kDa	14	15	10	14	13	13	18	17	15	23	19	20	13	12	14	13	18	17	16	13	17	13	15	18	22	21	21	16	18	21
147	Exportin-7 OS=Homo sapiens OX=9606 GN=XPO7 PE=1 SV=3	Q9UIA9	XPO7	124 kDa	11	9	14	12	11	16	18	19	21	17	21	18	16	19	19	12	10	12	17	14	13	13	21	14	24	27	27	17	14	22
148	Glutathione peroxidase 1 OS=Homo sapiens OX=9606 GN=GPX1 PE=1 SV=4	P07203	GPX1	22 kDa	12	10	4	12	9	5	18	21	22	18	16	18	21	22	18	15	12	17	20	19	20	21	19	18	13	14	13	16	16	10
149	Glutathione S-transferase P OS=Homo sapiens OX=9606 GN=GSTP1 PE=1 SV=2	P09211	GSTP1	23 kDa	11	14	12	15	16	15	18	15	14	14	17	14	18	21	21	16	14	18	12	14	10	15	15	21	21	20	18	20	19	17
150	Adenylyl cyclase-associated protein 1 OS=Homo sapiens OX=9606 GN=CAP1 PE=1 SV=5	Q01518	CAP1	52 kDa	11	9	8	10	12	14	18	11	17	10	9	7	15	16	15	18	18	14	18	11	15	17	27	26	14	11	13	14	18	15
151	Fibronectin OS=Homo sapiens OX=9606 GN=FN1 PE=1 SV=5	P02751	FN1	272 kDa	15	18	15	11	11	9	17	16	18	11	4	4	40	42	39	27	34	39	37	35	32	18	23	17	56	48	49	55	50	64
152	Protein-L-isoaspartate(D-aspartate) O-methyltransferase OS=Homo sapiens OX=9606 GN=PCMT1 PE=1 SV=4	P22061	PCMT1	25 kDa	22	23	29	26	25	22	17	22	25	32	34	39	32	25	34	19	24	35	23	24	30	24	38	36	37	34	41	36	38	30
153	E2 ubiquitin-conjugating enzyme OS=Homo sapiens OX=9606 GN=UBE2O PE=1 SV=3	sp|Q9C0C9|UBE2O_HUMAN	UBE2O	141 kDa	22	15	17	22	15	22	17	18	20	16	16	11	22	19	19	17	22	21	16	17	18	20	26	19	34	37	44	30	37	34
154	T-complex protein 1 subunit eta OS=Homo sapiens OX=9606 GN=CCT7 PE=1 SV=2	Q99832	CCT7	59 kDa	15	18	15	17	17	21	17	18	17	23	30	25	26	26	26	20	25	19	21	20	19	22	28	28	22	20	28	18	17	21
155	T-complex protein 1 subunit alpha OS=Homo sapiens OX=9606 GN=TCP1 PE=1 SV=1	P17987	TCP1	60 kDa	16	18	11	17	23	17	17	16	15	26	22	20	19	15	26	14	22	21	24	13	15	17	29	23	31	35	35	21	28	31
156	Proteasome activator complex subunit 1 OS=Homo sapiens OX=9606 GN=PSME1 PE=1 SV=1	Q06323	PSME1	29 kDa	19	17	13	14	17	17	17	14	16	17	17	16	16	18	21	16	20	13	19	19	15	17	21	18	26	23	21	19	15	24
157	DNA damage-binding protein 1 OS=Homo sapiens OX=9606 GN=DDB1 PE=1 SV=1	Q16531	DDB1	127 kDa	16	19	14	14	20	14	17	15	25	15	17	16	14	15	17	22	16	15	9	11	10	17	17	20	20	18	17	19	15	23
158	3-mercaptopyruvate sulfurtransferase OS=Homo sapiens OX=9606 GN=MPST PE=1 SV=3	P25325	MPST	33 kDa	20	26	16	15	19	18	17	16	19	19	23	20	14	16	16	19	18	16	11	15	13	10	15	17	13	14	17	10	12	13
159	Transaldolase OS=Homo sapiens OX=9606 GN=TALDO1 PE=1 SV=2	P37837	TALDO1	38 kDa	12	18	12	13	14	8	17	15	16	12	11	9	11	10	11	14	15	11	8	8	10	22	25	22	13	10	14	10	14	11
160	T-complex protein 1 subunit zeta OS=Homo sapiens OX=9606 GN=CCT6A PE=1 SV=3	P40227	CCT6A	58 kDa	14	10	9	11	9	12	17	19	17	11	10	10	12	20	15	18	17	16	12	10	9	17	16	18	14	16	12	12	20	17
161	Tubulin alpha-1B chain OS=Homo sapiens OX=9606 GN=TUBA1B PE=1 SV=1	P68363	TUBA1B	50 kDa	5	3	6	5	5	5	17	15	11	0	2	3	12	9	9	17	21	23	7	7	7	18	26	26	13	13	11	11	11	8
162	Hypoxanthine-guanine phosphoribosyltransferase OS=Homo sapiens OX=9606 GN=HPRT1 PE=1 SV=2	P00492	HPRT1	25 kDa	11	12	14	13	17	21	17	19	19	18	21	22	0	0	0	0	0	0	0	0	0	0	0	0	0	0	0	0	0	0
163	Alpha-actinin-4 OS=Homo sapiens OX=9606 GN=ACTN4 PE=1 SV=2	O43707	ACTN4	105 kDa	0	0	0	0	0	0	17	17	15	0	0	0	0	0	0	18	19	26	0	0	0	12	0	16	0	0	0	0	0	0
164	26S proteasome non-ATPase regulatory subunit 2 OS=Homo sapiens OX=9606 GN=PSMD2 PE=1 SV=3	Q13200	PSMD2	100 kDa	18	17	16	17	24	24	16	17	18	27	27	27	35	35	34	25	21	29	27	27	25	20	23	22	29	25	28	23	25	32
165	6-phosphogluconate dehydrogenase, decarboxylating OS=Homo sapiens OX=9606 GN=PGD PE=1 SV=3	P52209	PGD	53 kDa	19	18	18	14	13	16	16	18	18	13	21	19	23	27	21	23	21	25	18	15	17	19	31	22	28	21	23	20	24	27
166	S-formylglutathione hydrolase OS=Homo sapiens OX=9606 GN=ESD PE=1 SV=2	P10768	ESD	31 kDa	15	15	14	14	16	18	16	17	17	23	22	20	16	20	21	20	16	15	17	20	23	20	26	18	18	19	18	22	21	17
167	NSFL1 cofactor p47 OS=Homo sapiens OX=9606 GN=NSFL1C PE=1 SV=2	Q9UNZ2	NSFL1C	41 kDa	19	17	17	21	20	18	16	12	14	20	21	18	14	11	11	14	16	14	13	12	13	15	20	16	18	14	20	12	14	17
168	Keratin, type I cytoskeletal 10 OS=Homo sapiens OX=9606 GN=KRT10 PE=1 SV=6	P13645	KRT10	59 kDa	3	5	6	31	30	26	16	17	13	13	7	11	8	6	9	22	26	26	14	7	13	4	4	6	16	15	16	21	24	30
169	Ubiquitin-conjugating enzyme E2 variant 1 OS=Homo sapiens OX=9606 GN=UBE2V1 PE=1 SV=2	Q13404	UBE2V1	16 kDa	13	13	12	11	10	13	16	19	16	11	13	15	10	12	12	13	22	17	13	9	13	19	17	16	16	15	16	17	18	18
170	D-dopachrome decarboxylase OS=Homo sapiens OX=9606 GN=DDT PE=1 SV=3	P30046	DDT	13 kDa	13	15	12	12	11	13	16	15	14	15	16	18	13	14	14	17	16	15	12	10	12	17	18	14	23	22	21	19	17	11
171	Acetyl-CoA acetyltransferase, cytosolic OS=Homo sapiens OX=9606 GN=ACAT2 PE=1 SV=2	Q9BWD1	ACAT2	41 kDa	17	14	12	14	11	12	16	11	10	11	14	13	16	17	13	13	16	15	14	19	14	18	13	14	21	20	13	18	16	18
172	Immunoglobulin heavy constant alpha 1 OS=Homo sapiens OX=9606 GN=IGHA1 PE=1 SV=2	P01876	IGHA1	38 kDa	17	13	10	9	6	9	16	12	18	9	7	10	14	14	16	9	13	13	8	9	7	6	7	8	2	4	4	5	4	5
173	Tubulin beta-4A chain OS=Homo sapiens OX=9606 GN=TUBB4A PE=1 SV=2	P04350	TUBB4A	50 kDa	0	13	0	0	0	0	16	0	17	0	0	0	0	0	0	0	20	17	0	0	0	14	18	16	0	0	0	0	0	17
174	Proliferation-associated protein 2G4 OS=Homo sapiens OX=9606 GN=PA2G4 PE=1 SV=3	Q9UQ80	PA2G4	44 kDa	7	8	8	6	11	9	16	10	11	14	17	15	13	14	11	12	7	13	13	11	14	10	11	11	8	11	12	17	12	13
175	Aquaporin-1 OS=Homo sapiens OX=9606 GN=AQP1 PE=1 SV=3	P29972	AQP1	29 kDa	11	18	9	13	10	12	16	14	11	17	12	14	9	6	6	8	12	8	0	11	8	10	15	6	10	7	12	7	5	0
176	Multifunctional protein ADE2 OS=Homo sapiens OX=9606 GN=PAICS PE=1 SV=3	P22234	PAICS	47 kDa	6	14	6	7	7	5	16	13	12	8	13	10	6	7	9	9	11	17	7	6	9	11	13	13	19	17	17	11	15	13
177	Proteasome subunit alpha type-1 OS=Homo sapiens OX=9606 GN=PSMA1 PE=1 SV=1	P25786	PSMA1	30 kDa	20	24	23	20	15	18	15	19	15	19	18	17	12	16	15	22	19	19	21	19	17	22	22	19	16	17	15	13	12	14
178	Adenylate kinase isoenzyme 1 OS=Homo sapiens OX=9606 GN=AK1 PE=1 SV=3	P00568	AK1	22 kDa	19	18	22	22	17	15	15	12	15	17	20	20	24	18	21	13	12	14	21	22	21	15	24	22	33	32	33	26	25	26
179	Nicotinate phosphoribosyltransferase OS=Homo sapiens OX=9606 GN=NAPRT PE=1 SV=2	Q6XQN6	NAPRT	58 kDa	12	16	16	10	9	8	15	11	9	14	14	22	15	22	19	10	17	25	17	7	10	22	19	13	19	18	20	14	15	16
180	Tubulin beta-4B chain OS=Homo sapiens OX=9606 GN=TUBB4B PE=1 SV=1	P68371	TUBB4B	50 kDa	12	12	10	10	7	13	15	11	19	3	4	3	11	12	13	17	19	20	11	5	7	19	22	22	20	17	22	19	14	19
181	Glucose 1,6-bisphosphate synthase OS=Homo sapiens OX=9606 GN=PGM2L1 PE=1 SV=3	Q6PCE3	PGM2L1	70 kDa	9	11	10	8	11	11	15	9	11	19	14	17	17	12	17	12	11	12	9	12	13	18	19	7	14	16	8	14	12	13
182	Hemoglobin subunit theta-1 OS=Homo sapiens OX=9606 GN=HBQ1 PE=1 SV=2	P09105	HBQ1	16 kDa	14	11	13	12	18	13	15	8	7	9	11	10	13	11	12	12	14	18	13	9	11	13	13	11	17	17	15	12	13	15
183	26S proteasome non-ATPase regulatory subunit 9 OS=Homo sapiens OX=9606 GN=PSMD9 PE=1 SV=3	O00233	PSMD9	25 kDa	8	8	8	10	7	10	15	10	10	7	10	10	16	12	13	10	9	11	9	14	10	9	20	11	13	8	13	11	10	12
184	Integrin alpha-IIb OS=Homo sapiens OX=9606 GN=ITGA2B PE=1 SV=3	P08514	ITGA2B	113 kDa	3	2	3	0	0	3	15	14	21	0	0	0	8	8	13	17	25	15	8	6	4	23	15	13	9	10	8	4	4	5
185	Eukaryotic initiation factor 4A-I OS=Homo sapiens OX=9606 GN=EIF4A1 PE=1 SV=1	P60842	EIF4A1	46 kDa	9	10	12	10	10	18	14	13	15	18	16	25	25	23	21	25	21	26	28	16	19	23	25	30	26	28	29	27	30	27
186	Heat shock 70 kDa protein 4 OS=Homo sapiens OX=9606 GN=HSPA4 PE=1 SV=4	P34932	HSPA4	94 kDa	10	11	13	15	15	15	14	17	20	24	25	19	23	24	24	17	14	21	22	19	23	16	23	16	27	22	17	25	22	27
187	Ubiquitin carboxyl-terminal hydrolase 15 OS=Homo sapiens OX=9606 GN=USP15 PE=1 SV=3	Q9Y4E8	USP15	112 kDa	16	11	14	14	14	13	14	12	14	14	19	18	19	18	16	18	13	9	13	18	16	15	18	12	19	18	18	27	20	25
188	Ribose-5-phosphate isomerase OS=Homo sapiens OX=9606 GN=RPIA PE=1 SV=3	P49247	RPIA	33 kDa	14	15	15	16	12	14	14	13	14	11	14	13	15	16	19	17	19	13	18	15	16	14	17	18	11	11	13	12	15	16
189	Thioredoxin-like protein 1 OS=Homo sapiens OX=9606 GN=TXNL1 PE=1 SV=3	O43396	TXNL1	32 kDa	10	9	10	11	12	9	14	9	8	12	15	13	10	13	8	13	9	8	13	15	9	7	4	10	18	22	14	17	14	18
190	Glucose-6-phosphate isomerase OS=Homo sapiens OX=9606 GN=GPI PE=1 SV=4	P06744	GPI	63 kDa	9	7	11	15	14	12	14	15	11	11	11	11	17	8	11	13	10	16	16	11	10	17	20	18	17	11	9	12	8	16
191	26S proteasome non-ATPase regulatory subunit 5 OS=Homo sapiens OX=9606 GN=PSMD5 PE=1 SV=3	Q16401	PSMD5	56 kDa	11	10	13	10	8	10	14	11	10	12	10	13	8	9	13	5	9	11	11	9	13	8	12	10	17	21	20	10	14	14
192	Platelet-activating factor acetylhydrolase IB subunit alpha1 OS=Homo sapiens OX=9606 GN=PAFAH1B3 PE=1 SV=1	Q15102	PAFAH1B3	26 kDa	14	16	13	15	14	13	14	14	13	15	18	12	13	10	15	12	10	15	10	14	10	12	13	10	10	10	11	11	13	10
193	F-box only protein 7 OS=Homo sapiens OX=9606 GN=FBXO7 PE=1 SV=1	Q9Y3I1	FBXO7	59 kDa	9	8	9	4	4	6	14	11	17	5	7	9	10	10	11	9	9	11	6	6	8	16	16	18	18	14	14	18	16	15
194	ADP-ribosylation factor 1 OS=Homo sapiens OX=9606 GN=ARF1 PE=1 SV=2	P84077	ARF1	21 kDa	10	9	6	11	12	11	14	12	9	11	14	9	8	9	6	3	10	9	8	6	4	8	8	9	4	5	7	3	9	5
195	V-type proton ATPase catalytic subunit A OS=Homo sapiens OX=9606 GN=ATP6V1A PE=1 SV=2	P38606	ATP6V1A	68 kDa	4	6	2	5	4	3	14	8	5	3	7	3	10	7	15	6	7	9	6	3	6	9	9	7	11	12	16	6	7	8
196	Integrin beta-3 OS=Homo sapiens OX=9606 GN=ITGB3 PE=1 SV=2	P05106	ITGB3	87 kDa	3	3	4	2	5	6	14	11	13	5	0	2	4	4	5	13	12	13	3	5	5	9	15	9	7	4	3	2	3	2
197	Tubulin beta chain OS=Homo sapiens OX=9606 GN=TUBB PE=1 SV=2	P07437	TUBB	50 kDa	0	0	0	0	0	0	14	0	14	0	0	0	0	0	0	21	17	16	0	0	0	17	15	17	0	0	0	0	0	14
198	Keratin, type II cytoskeletal 1 OS=Homo sapiens OX=9606 GN=KRT1 PE=1 SV=6	P04264	KRT1	66 kDa	6	9	7	36	40	46	13	16	18	11	16	15	11	5	8	147	158	157	17	13	19	7	16	8	30	29	27	26	28	33
199	55 kDa erythrocyte membrane protein OS=Homo sapiens OX=9606 GN=MPP1 PE=1 SV=2	Q00013	MPP1	52 kDa	21	18	14	15	10	13	13	16	13	15	22	27	19	26	26	14	15	22	18	18	18	21	21	20	34	19	25	21	25	27
200	Plasminogen OS=Homo sapiens OX=9606 GN=PLG PE=1 SV=2	P00747	PLG	91 kDa	7	9	10	12	8	7	13	5	13	0	3	3	38	36	38	22	26	21	18	29	29	10	11	12	19	24	23	46	35	42
201	Programmed cell death 6-interacting protein OS=Homo sapiens OX=9606 GN=PDCD6IP PE=1 SV=1	Q8WUM4	PDCD6IP	96 kDa	12	12	13	16	14	11	13	15	16	13	16	11	20	20	21	30	18	25	16	24	17	25	31	28	27	28	21	28	24	28
202	Calpain-1 catalytic subunit OS=Homo sapiens OX=9606 GN=CAPN1 PE=1 SV=1	P07384	CAPN1	82 kDa	13	13	12	14	13	14	13	13	16	12	12	18	17	19	20	15	13	21	17	17	14	16	19	21	27	30	35	19	25	21
203	Importin subunit beta-1 OS=Homo sapiens OX=9606 GN=KPNB1 PE=1 SV=2	Q14974	KPNB1	97 kDa	9	12	12	14	12	17	13	14	17	19	23	18	20	19	18	16	16	18	15	17	14	19	17	15	23	26	24	23	29	30
204	Phosphoglycerate mutase 1 OS=Homo sapiens OX=9606 GN=PGAM1 PE=1 SV=2	P18669	PGAM1	29 kDa	15	12	13	12	12	11	13	17	15	16	18	13	19	19	20	15	21	16	16	19	14	19	22	24	18	17	18	17	14	21
205	Glutathione reductase, mitochondrial OS=Homo sapiens OX=9606 GN=GSR PE=1 SV=2	P00390	GSR	56 kDa	15	13	15	10	20	9	13	18	15	26	22	10	17	27	25	16	16	15	23	15	20	11	15	12	19	26	25	18	15	20
206	GDP-L-fucose synthase OS=Homo sapiens OX=9606 GN=GFUS PE=1 SV=1	Q13630	GFUS	36 kDa	13	9	12	16	14	14	13	14	13	15	19	21	17	16	17	12	13	17	16	16	16	19	17	14	23	23	24	23	21	14
207	Obg-like ATPase 1 OS=Homo sapiens OX=9606 GN=OLA1 PE=1 SV=2	Q9NTK5	OLA1	45 kDa	9	9	11	7	11	11	13	11	9	21	19	19	21	20	23	13	18	17	23	17	22	16	21	15	24	20	17	18	19	16
208	Calpain small subunit 1 OS=Homo sapiens OX=9606 GN=CAPNS1 PE=1 SV=1	P04632	CAPNS1	28 kDa	18	16	17	17	13	18	13	15	16	12	12	19	13	13	13	17	15	12	15	14	14	19	18	14	24	22	21	21	20	19
209	Flotillin-2 OS=Homo sapiens OX=9606 GN=FLOT2 PE=1 SV=2	Q14254	FLOT2	47 kDa	20	14	11	14	13	19	13	10	10	13	18	17	19	14	19	9	11	15	11	14	11	22	21	23	13	17	16	11	14	15
210	Inter-alpha-trypsin inhibitor heavy chain H1 OS=Homo sapiens OX=9606 GN=ITIH1 PE=1 SV=3	P19827	ITIH1	101 kDa	12	10	9	10	9	6	13	14	9	6	3	4	21	24	21	9	15	15	17	12	19	11	18	12	28	31	35	25	29	30
211	Proteasome subunit alpha type-4 OS=Homo sapiens OX=9606 GN=PSMA4 PE=1 SV=1	P25789	PSMA4	29 kDa	14	7	9	13	8	11	13	11	14	9	14	13	9	10	15	12	13	17	15	9	8	14	16	12	25	13	17	13	13	14
212	Aspartate aminotransferase, cytoplasmic OS=Homo sapiens OX=9606 GN=GOT1 PE=1 SV=3	P17174	GOT1	46 kDa	11	10	15	10	18	11	13	13	11	11	12	10	16	15	13	11	15	9	11	12	11	13	16	14	17	21	15	10	14	12
213	Rho GDP-dissociation inhibitor 1 OS=Homo sapiens OX=9606 GN=ARHGDIA PE=1 SV=3	P52565	ARHGDIA	23 kDa	9	6	9	10	11	11	13	11	9	7	8	9	13	11	13	14	13	9	9	10	10	10	20	13	10	14	8	10	9	10
214	14 kDa phosphohistidine phosphatase OS=Homo sapiens OX=9606 GN=PHPT1 PE=1 SV=1	Q9NRX4	PHPT1	14 kDa	12	11	14	12	12	15	13	7	13	13	14	15	9	9	12	15	13	11	11	12	11	11	13	10	14	13	8	11	9	19
215	Ran-specific GTPase-activating protein OS=Homo sapiens OX=9606 GN=RANBP1 PE=1 SV=1	P43487	RANBP1	23 kDa	10	10	10	10	11	10	13	12	12	6	11	9	12	18	10	17	9	16	17	7	9	14	15	15	10	12	9	11	10	12
216	Rho GDP-dissociation inhibitor 2 OS=Homo sapiens OX=9606 GN=ARHGDIB PE=1 SV=3	P52566	ARHGDIB	23 kDa	9	6	11	4	6	4	13	10	11	5	9	4	4	8	6	9	9	12	8	7	4	11	17	13	7	6	5	7	7	7
217	Ubiquitin-conjugating enzyme E2 variant 2 OS=Homo sapiens OX=9606 GN=UBE2V2 PE=1 SV=4	Q15819	UBE2V2	16 kDa	12	9	0	0	0	0	13	9	12	0	0	0	0	0	0	10	8	14	0	0	0	13	13	14	0	0	0	0	0	0
218	Ubiquitin carboxyl-terminal hydrolase 5 OS=Homo sapiens OX=9606 GN=USP5 PE=1 SV=2	P45974	USP5	96 kDa	13	13	17	25	22	20	12	15	13	20	21	27	32	23	25	17	14	19	24	26	23	21	21	28	31	26	29	22	26	23
219	Ubiquitin-conjugating enzyme E2 L3 OS=Homo sapiens OX=9606 GN=UBE2L3 PE=1 SV=1	P68036	UBE2L3	18 kDa	16	15	15	14	15	13	12	15	14	15	17	17	18	16	19	18	21	18	17	15	18	19	22	21	16	20	18	17	17	16
220	Cullin-1 OS=Homo sapiens OX=9606 GN=CUL1 PE=1 SV=2	Q13616	CUL1	90 kDa	17	17	16	14	16	18	12	14	14	13	19	17	18	18	15	15	20	12	16	17	18	16	22	12	13	20	19	14	18	17
221	Probable ubiquitin carboxyl-terminal hydrolase FAF-X OS=Homo sapiens OX=9606 GN=USP9X PE=1 SV=4	Q93008	USP9X	290 kDa	10	7	5	12	13	10	12	11	8	11	11	14	14	12	12	14	12	12	10	16	14	11	13	11	27	19	26	34	19	16
222	Leukocyte elastase inhibitor OS=Homo sapiens OX=9606 GN=SERPINB1 PE=1 SV=1	P30740	SERPINB1	43 kDa	14	11	13	9	10	11	12	20	18	9	6	7	14	16	18	19	13	22	15	12	18	17	28	22	13	14	14	15	10	15
223	Proteasome subunit alpha type-7 OS=Homo sapiens OX=9606 GN=PSMA7 PE=1 SV=1	O14818	PSMA7	28 kDa	12	11	14	14	9	14	12	8	13	9	13	14	15	14	11	11	13	13	13	16	13	13	10	15	18	17	22	14	18	17
224	BRO1 domain-containing protein BROX OS=Homo sapiens OX=9606 GN=BROX PE=1 SV=1	Q5VW32	BROX	46 kDa	14	11	8	9	7	8	12	12	11	15	14	15	13	12	15	9	12	12	13	12	13	16	9	9	18	15	22	13	8	11
225	Peptidyl-prolyl cis-trans isomerase FKBP1A OS=Homo sapiens OX=9606 GN=FKBP1A PE=1 SV=2	P62942	FKBP1A	12 kDa	8	9	12	11	10	9	12	13	12	13	10	13	12	13	11	13	13	13	10	15	9	19	14	12	18	13	12	11	13	16
226	Phosphoribosylformylglycinamidine synthase OS=Homo sapiens OX=9606 GN=PFAS PE=1 SV=4	O15067	PFAS	145 kDa	13	7	6	12	10	10	12	15	12	14	18	17	9	11	12	5	10	11	6	8	11	8	9	8	15	20	17	12	15	10
227	Importin-7 OS=Homo sapiens OX=9606 GN=IPO7 PE=1 SV=1	O95373	IPO7	120 kDa	9	9	7	7	10	9	12	8	11	13	13	13	14	9	11	7	12	11	7	6	9	12	9	8	17	16	22	12	16	14
228	Serine/threonine-protein phosphatase 2A catalytic subunit alpha isoform OS=Homo sapiens OX=9606 GN=PPP2CA PE=1 SV=1	P67775	PPP2CA	36 kDa	10	12	7	9	9	10	12	11	8	10	12	11	11	10	13	14	7	10	12	11	12	13	10	9	13	15	18	15	18	17
229	Phosphatidylinositol 5-phosphate 4-kinase type-2 alpha OS=Homo sapiens OX=9606 GN=PIP4K2A PE=1 SV=2	P48426	PIP4K2A	46 kDa	10	10	6	6	10	9	12	11	11	10	12	11	7	12	9	12	11	14	7	9	9	11	11	12	10	18	14	11	13	14
230	Histone-arginine methyltransferase CARM1 OS=Homo sapiens OX=9606 GN=CARM1 PE=1 SV=3	Q86X55	CARM1	66 kDa	4	7	6	6	10	7	12	8	8	9	10	9	8	14	15	12	11	10	10	10	11	12	14	18	17	13	9	10	13	15
231	Exportin-1 OS=Homo sapiens OX=9606 GN=XPO1 PE=1 SV=1	O14980	XPO1	123 kDa	7	5	7	7	9	8	12	10	8	11	14	7	9	11	7	10	10	10	10	12	11	11	9	8	14	16	13	11	12	11
232	COP9 signalosome complex subunit 6 OS=Homo sapiens OX=9606 GN=COPS6 PE=1 SV=1	Q7L5N1	COPS6	36 kDa	12	10	14	10	13	9	12	11	11	12	17	7	10	5	8	12	8	12	13	7	10	13	14	13	9	6	13	9	8	9
233	Transport and Golgi organization protein 2 homolog OS=Homo sapiens OX=9606 GN=TANGO2 PE=1 SV=1	Q6ICL3	TANGO2	31 kDa	8	8	6	6	9	7	12	12	9	10	13	10	10	9	8	11	9	10	8	12	9	13	13	8	12	17	14	11	13	12
234	Latexin OS=Homo sapiens OX=9606 GN=LXN PE=1 SV=2	Q9BS40	LXN	26 kDa	10	9	9	9	9	6	12	12	7	10	11	9	6	9	11	11	10	6	9	7	8	10	12	12	9	10	11	8	7	9
235	Ankyrin-3 OS=Homo sapiens OX=9606 GN=ANK3 PE=1 SV=3	Q12955	ANK3	480 kDa	0	0	0	0	0	0	12	0	0	0	25	0	17	0	16	0	0	15	0	0	0	0	0	0	0	0	24	0	18	0
236	Histone H1.2 OS=Homo sapiens OX=9606 GN=H1-2 PE=1 SV=2	P16403	H1-2	21 kDa	0	0	0	0	0	0	12	9	12	0	0	0	0	0	0	0	0	0	0	0	0	10	12	13	0	0	0	0	0	0
237	Complement C4-B OS=Homo sapiens OX=9606 GN=C4B PE=1 SV=2	P0C0L5	C4B	193 kDa	36	40	46	31	33	41	11	11	7	4	2	3	50	45	41	32	29	32	48	46	52	20	26	33	79	66	79	68	63	67
238	14-3-3 protein beta/alpha OS=Homo sapiens OX=9606 GN=YWHAB PE=1 SV=3	P31946	YWHAB	28 kDa	18	11	12	21	14	13	11	16	13	14	11	17	14	17	13	15	15	22	13	17	18	27	28	19	21	19	18	17	15	20
239	Glucose-6-phosphate 1-dehydrogenase OS=Homo sapiens OX=9606 GN=G6PD PE=1 SV=4	P11413	G6PD	59 kDa	7	8	9	11	11	10	11	16	14	11	15	13	21	20	16	11	18	15	13	13	10	16	22	14	24	19	19	13	14	19
240	E3 ubiquitin-protein ligase UBR4 OS=Homo sapiens OX=9606 GN=UBR4 PE=1 SV=1	Q5T4S7	UBR4	574 kDa	12	9	11	8	15	10	11	16	11	7	8	10	15	13	8	9	19	14	11	16	14	9	19	17	18	15	14	20	18	14
241	GMP reductase 1 OS=Homo sapiens OX=9606 GN=GMPR PE=1 SV=1	P36959	GMPR	37 kDa	13	12	11	12	10	6	11	11	7	10	10	11	17	19	20	14	12	18	18	12	20	14	12	12	19	15	14	14	16	18
242	Proteasome subunit beta type-2 OS=Homo sapiens OX=9606 GN=PSMB2 PE=1 SV=1	P49721	PSMB2	23 kDa	11	11	13	8	9	11	11	7	7	10	15	14	14	13	10	20	11	12	17	11	7	10	16	14	9	10	8	7	11	10
243	C-1-tetrahydrofolate synthase, cytoplasmic OS=Homo sapiens OX=9606 GN=MTHFD1 PE=1 SV=4	P11586	MTHFD1	102 kDa	9	9	4	4	4	4	11	12	13	6	11	8	8	12	10	17	12	14	8	8	4	13	17	11	12	12	12	10	7	12
244	Vesicle-fusing ATPase OS=Homo sapiens OX=9606 GN=NSF PE=1 SV=3	P46459	NSF	83 kDa	9	7	6	8	8	6	11	12	12	12	15	10	10	7	11	5	4	6	7	10	10	7	9	8	7	9	11	8	13	12
245	26S proteasome non-ATPase regulatory subunit 12 OS=Homo sapiens OX=9606 GN=PSMD12 PE=1 SV=3	O00232	PSMD12	53 kDa	9	7	4	4	5	6	11	5	7	7	8	3	7	10	10	12	12	8	7	7	9	12	13	8	11	7	7	10	7	7
246	Chloride intracellular channel protein 1 OS=Homo sapiens OX=9606 GN=CLIC1 PE=1 SV=4	O00299	CLIC1	27 kDa	4	4	7	3	0	0	11	7	5	5	5	0	3	3	5	7	9	5	4	8	2	12	7	7	9	9	14	4	0	2
247	Profilin-1 OS=Homo sapiens OX=9606 GN=PFN1 PE=1 SV=2	P07737	PFN1	15 kDa	3	4	5	0	2	2	11	9	11	0	0	0	10	5	8	14	17	11	8	7	2	10	17	18	7	10	7	4	7	5
248	COP9 signalosome complex subunit 1 OS=Homo sapiens OX=9606 GN=GPS1 PE=1 SV=4	Q13098	GPS1	56 kDa	9	10	9	12	11	11	10	8	15	9	16	11	16	8	13	13	14	13	16	10	8	12	14	19	15	16	19	17	13	12
249	Proteasome subunit alpha type-2 OS=Homo sapiens OX=9606 GN=PSMA2 PE=1 SV=2	P25787	PSMA2	26 kDa	7	9	8	8	12	12	10	6	5	9	10	13	8	15	18	12	9	10	18	13	13	14	13	11	15	20	18	20	15	14
250	14-3-3 protein theta OS=Homo sapiens OX=9606 GN=YWHAQ PE=1 SV=1	P27348	YWHAQ	28 kDa	13	7	8	12	9	7	10	10	7	10	10	13	14	14	12	11	12	11	6	12	9	10	10	9	18	21	17	14	12	17
251	Tubulin-specific chaperone A OS=Homo sapiens OX=9606 GN=TBCA PE=1 SV=3	O75347	TBCA	13 kDa	9	10	14	9	10	9	10	11	12	13	17	11	9	12	12	12	12	10	10	10	7	8	14	10	12	13	18	10	10	16
252	Fascin OS=Homo sapiens OX=9606 GN=FSCN1 PE=1 SV=3	Q16658	FSCN1	55 kDa	12	5	12	6	8	11	10	7	10	13	10	13	10	13	10	11	5	9	13	9	9	12	14	9	14	14	16	11	9	9
253	ATPase GET3 OS=Homo sapiens OX=9606 GN=GET3 PE=1 SV=2	O43681	GET3	39 kDa	8	5	6	10	12	9	10	7	6	8	11	10	14	16	14	5	7	7	8	8	11	7	7	4	12	9	9	12	12	15
254	Tubulin beta-1 chain OS=Homo sapiens OX=9606 GN=TUBB1 PE=1 SV=1	Q9H4B7	TUBB1	50 kDa	0	3	0	0	0	0	10	5	10	0	0	0	13	12	13	13	20	19	10	0	8	14	20	16	7	8	8	6	5	6
255	Carbonyl reductase [NADPH] 1 OS=Homo sapiens OX=9606 GN=CBR1 PE=1 SV=3	P16152	CBR1	30 kDa	7	6	5	6	6	6	10	9	6	6	6	10	11	13	8	8	8	6	10	12	10	10	6	7	14	15	13	9	12	9
256	Histone H2A type 1 OS=Homo sapiens OX=9606 GN=H2AC11 PE=1 SV=2	P0C0S8 (+2)	H2AC11	14 kDa	8	5	4	5	4	4	10	14	10	4	4	0	7	7	7	10	9	10	5	7	5	15	14	11	0	0	5	6	7	6
257	Multimerin-1 OS=Homo sapiens OX=9606 GN=MMRN1 PE=1 SV=3	Q13201	MMRN1	138 kDa	5	2	6	3	2	3	10	10	9	0	0	0	5	5	7	15	20	17	7	4	5	18	15	14	0	2	2	0	0	3
258	Pleckstrin OS=Homo sapiens OX=9606 GN=PLEK PE=1 SV=3	P08567	PLEK	40 kDa	5	7	6	5	4	5	10	10	13	0	0	0	3	5	5	11	10	9	4	4	5	11	12	12	5	4	5	2	0	5
259	Vimentin OS=Homo sapiens OX=9606 GN=VIM PE=1 SV=4	P08670	VIM	54 kDa	0	0	0	2	3	0	10	8	5	0	0	0	0	4	6	10	5	5	5	5	4	6	7	5	0	0	2	2	0	0
260	Apolipoprotein A-IV OS=Homo sapiens OX=9606 GN=APOA4 PE=1 SV=4	P06727	APOA4	45 kDa	21	18	15	13	11	12	9	11	15	3	5	5	19	23	20	12	11	19	22	23	16	14	13	10	40	51	48	56	55	51
261	Kininogen-1 OS=Homo sapiens OX=9606 GN=KNG1 PE=1 SV=2	P01042	KNG1	72 kDa	6	9	4	5	6	3	9	6	9	5	3	5	20	25	21	15	14	15	22	18	24	14	14	9	37	31	35	40	37	38
262	Alpha-1B-glycoprotein OS=Homo sapiens OX=9606 GN=A1BG PE=1 SV=4	P04217	A1BG	54 kDa	11	11	11	9	8	9	9	10	14	7	4	5	20	26	26	13	25	21	16	20	18	12	16	17	15	30	25	24	22	28
263	Proteasome subunit alpha type-5 OS=Homo sapiens OX=9606 GN=PSMA5 PE=1 SV=3	P28066	PSMA5	26 kDa	12	13	11	17	12	11	9	10	11	10	14	12	16	15	16	9	15	9	16	16	13	18	18	12	20	15	18	10	15	17
264	Bleomycin hydrolase OS=Homo sapiens OX=9606 GN=BLMH PE=1 SV=1	Q13867	BLMH	53 kDa	9	6	6	7	8	8	9	4	8	15	8	10	12	11	13	6	5	8	12	10	10	9	10	10	10	12	10	10	11	10
265	Phosphoribosyl pyrophosphate synthase-associated protein 1 OS=Homo sapiens OX=9606 GN=PRPSAP1 PE=1 SV=2	Q14558	PRPSAP1	39 kDa	10	9	8	11	8	9	9	8	10	7	13	12	13	14	10	8	13	10	11	11	8	6	12	13	10	12	11	9	8	13
266	Keratin, type II cytoskeletal 2 epidermal OS=Homo sapiens OX=9606 GN=KRT2 PE=1 SV=2	P35908	KRT2	65 kDa	0	0	0	22	26	22	9	9	10	5	0	0	4	0	6	14	19	17	0	0	0	0	0	0	10	9	8	11	11	15
267	Proteasome subunit beta type-1 OS=Homo sapiens OX=9606 GN=PSMB1 PE=1 SV=2	P20618	PSMB1	26 kDa	4	7	12	10	5	6	9	5	10	13	7	6	7	8	9	9	11	10	6	5	8	13	17	11	10	6	14	5	8	7
268	Cullin-3 OS=Homo sapiens OX=9606 GN=CUL3 PE=1 SV=2	Q13618	CUL3	89 kDa	6	4	5	8	9	7	9	7	7	12	7	10	9	6	6	8	9	9	5	10	10	11	11	7	9	9	14	10	13	13
269	Plastin-2 OS=Homo sapiens OX=9606 GN=LCP1 PE=1 SV=6	P13796	LCP1	70 kDa	9	6	6	4	5	7	9	8	8	6	5	4	12	9	11	6	9	10	12	8	9	12	18	13	9	10	9	6	11	11
270	Ras-related protein Rab-5C OS=Homo sapiens OX=9606 GN=RAB5C PE=1 SV=2	P51148	RAB5C	23 kDa	6	5	6	6	8	5	9	8	4	12	9	8	9	11	5	5	5	7	8	9	8	8	6	7	6	10	12	8	8	9
271	Heme-binding protein 1 OS=Homo sapiens OX=9606 GN=HEBP1 PE=1 SV=1	Q9NRV9	HEBP1	21 kDa	9	9	13	9	11	7	9	9	9	10	11	12	11	6	7	5	4	6	5	5	6	7	8	7	11	10	11	9	5	11
272	Low molecular weight phosphotyrosine protein phosphatase OS=Homo sapiens OX=9606 GN=ACP1 PE=1 SV=3	P24666	ACP1	18 kDa	10	8	10	8	12	10	9	5	4	9	6	6	7	5	10	9	8	10	6	6	6	8	11	10	19	13	11	10	11	7
273	Putative elongation factor 1-alpha-like 3 OS=Homo sapiens OX=9606 GN=EEF1A1P5 PE=5 SV=1	Q5VTE0	EEF1A1P5	50 kDa	0	3	3	7	5	7	9	7	6	0	0	0	3	5	7	6	11	8	7	5	8	10	14	12	9	9	6	6	6	13
274	Proteasome subunit beta type-7 OS=Homo sapiens OX=9606 GN=PSMB7 PE=1 SV=1	Q99436	PSMB7	30 kDa	4	0	5	6	7	4	9	3	3	6	4	5	4	10	6	3	3	4	5	6	8	2	7	7	7	7	10	5	3	2
275	Ras-related protein Rap-1b OS=Homo sapiens OX=9606 GN=RAP1B PE=1 SV=1	P61224	RAP1B	21 kDa	6	5	2	6	4	5	9	7	6	0	0	6	7	6	7	7	6	10	6	0	5	8	6	7	4	5	5	2	5	3
276	Histone H1.4 OS=Homo sapiens OX=9606 GN=H1-4 PE=1 SV=2	P10412	H1-4	22 kDa	9	7	5	0	0	3	9	9	12	0	0	0	0	0	0	9	9	8	4	3	4	8	12	13	8	4	5	3	3	4
277	Histone H2B type 1-N OS=Homo sapiens OX=9606 GN=H2BC15 PE=1 SV=3	Q99877	H2BC15	14 kDa	2	5	4	2	4	0	9	5	4	0	0	0	4	4	3	5	5	8	3	5	6	8	12	11	6	5	6	5	5	3
278	Coagulation factor XIII A chain OS=Homo sapiens OX=9606 GN=F13A1 PE=1 SV=4	P00488	F13A1	83 kDa	2	3	2	0	2	0	9	10	10	0	0	0	5	5	2	8	15	11	3	2	3	6	8	7	0	0	0	0	0	0
279	Protein S100-A4 OS=Homo sapiens OX=9606 GN=S100A4 PE=1 SV=1	P26447	S100A4	12 kDa	9	8	5	6	9	6	9	6	7	10	15	12	9	4	8	5	4	5	10	5	5	7	9	7	13	6	8	0	0	9
280	Alpha-2-HS-glycoprotein OS=Homo sapiens OX=9606 GN=AHSG PE=1 SV=2	P02765	AHSG	39 kDa	14	9	14	10	9	12	9	10	10	11	9	9	14	11	14	13	11	10	15	13	13	10	9	11	32	30	30	32	38	39
281	Rab GDP dissociation inhibitor alpha OS=Homo sapiens OX=9606 GN=GDI1 PE=1 SV=2	P31150	GDI1	51 kDa	0	0	0	0	8	0	9	10	0	9	11	12	18	15	17	14	15	18	10	15	16	14	14	18	14	16	14	12	9	14
282	Prothrombin OS=Homo sapiens OX=9606 GN=F2 PE=1 SV=2	P00734	F2	70 kDa	12	8	7	6	5	6	8	5	6	0	2	0	24	24	26	20	15	16	18	13	16	14	10	9	30	34	31	35	31	32
283	Uroporphyrinogen decarboxylase OS=Homo sapiens OX=9606 GN=UROD PE=1 SV=2	P06132	UROD	41 kDa	8	5	6	4	6	8	8	5	5	10	10	10	19	18	18	11	16	13	16	16	15	11	12	12	15	15	18	16	18	19
284	RuvB-like 1 OS=Homo sapiens OX=9606 GN=RUVBL1 PE=1 SV=1	Q9Y265	RUVBL1	50 kDa	4	11	7	15	9	9	8	10	10	10	11	13	8	11	7	14	11	11	13	10	10	14	16	18	15	16	12	12	9	10
285	Protein ABHD14B OS=Homo sapiens OX=9606 GN=ABHD14B PE=1 SV=1	Q96IU4	ABHD14B	22 kDa	9	12	14	12	11	12	8	14	9	14	13	13	11	12	10	8	11	12	10	14	8	11	10	10	11	14	12	11	11	11
286	Nucleosome assembly protein 1-like 4 OS=Homo sapiens OX=9606 GN=NAP1L4 PE=1 SV=1	Q99733	NAP1L4	43 kDa	8	6	9	9	8	10	8	8	5	10	7	6	11	13	14	9	8	15	10	12	12	12	14	16	16	14	16	13	14	15
287	COP9 signalosome complex subunit 4 OS=Homo sapiens OX=9606 GN=COPS4 PE=1 SV=1	Q9BT78	COPS4	46 kDa	10	9	8	10	8	10	8	8	10	12	12	15	8	10	9	6	5	5	8	8	8	7	8	7	12	10	9	10	14	11
288	26S proteasome non-ATPase regulatory subunit 3 OS=Homo sapiens OX=9606 GN=PSMD3 PE=1 SV=2	O43242	PSMD3	61 kDa	11	7	4	9	3	5	8	7	5	3	6	3	5	8	11	17	11	10	7	8	8	11	14	12	13	12	10	8	10	12
289	Biliverdin reductase A OS=Homo sapiens OX=9606 GN=BLVRA PE=1 SV=2	P53004	BLVRA	33 kDa	11	9	10	8	11	13	8	5	5	5	2	4	7	9	7	8	7	11	5	4	4	9	9	6	8	9	13	4	7	7
290	Dihydropteridine reductase OS=Homo sapiens OX=9606 GN=QDPR PE=1 SV=2	P09417	QDPR	26 kDa	8	6	7	7	5	8	8	8	9	10	11	7	11	9	9	8	7	8	5	5	3	7	4	8	13	15	14	14	9	13
291	Ubiquitin thioesterase OTU1 OS=Homo sapiens OX=9606 GN=YOD1 PE=1 SV=1	Q5VVQ6	YOD1	38 kDa	7	8	7	5	5	6	8	12	6	6	8	6	6	6	11	11	14	7	9	9	7	10	12	10	8	11	11	10	6	6
292	Peptidyl-prolyl cis-trans isomerase FKBP4 OS=Homo sapiens OX=9606 GN=FKBP4 PE=1 SV=3	Q02790	FKBP4	52 kDa	4	4	5	9	7	7	8	3	3	10	7	8	7	8	8	3	4	2	8	8	5	4	0	5	9	6	6	6	8	7
293	Uroporphyrinogen-III synthase OS=Homo sapiens OX=9606 GN=UROS PE=1 SV=1	P10746	UROS	29 kDa	6	6	0	5	5	2	8	6	7	3	5	3	6	6	6	5	12	5	7	3	6	7	6	7	5	7	8	6	8	7
294	26S proteasome non-ATPase regulatory subunit 10 OS=Homo sapiens OX=9606 GN=PSMD10 PE=1 SV=1	O75832	PSMD10	24 kDa	7	8	8	4	3	4	8	4	8	4	3	5	6	7	5	8	8	6	5	6	5	10	5	6	5	5	3	7	5	5
295	Protein disulfide-isomerase A3 OS=Homo sapiens OX=9606 GN=PDIA3 PE=1 SV=4	P30101	PDIA3	57 kDa	0	0	3	6	7	0	8	11	7	0	0	0	3	3	3	8	6	8	3	3	5	9	5	6	0	0	0	0	0	0
296	Myeloid cell nuclear differentiation antigen OS=Homo sapiens OX=9606 GN=MNDA PE=1 SV=1	P41218	MNDA	46 kDa	3	2	2	3	2	2	8	8	6	0	0	0	3	0	3	0	3	5	5	3	3	7	8	5	3	3	2	0	0	0
297	Copper chaperone for superoxide dismutase OS=Homo sapiens OX=9606 GN=CCS PE=1 SV=1	O14618	CCS	29 kDa	7	5	7	0	0	0	8	6	7	0	0	0	7	7	10	8	6	5	0	8	0	7	5	7	6	5	6	8	8	8
298	26S proteasome non-ATPase regulatory subunit 7 OS=Homo sapiens OX=9606 GN=PSMD7 PE=1 SV=2	P51665	PSMD7	37 kDa	5	5	6	4	5	0	8	4	9	4	0	0	7	8	6	10	10	10	0	0	0	8	6	8	5	7	7	6	0	5
299	Complement factor B OS=Homo sapiens OX=9606 GN=CFB PE=1 SV=2	P00751	CFB	86 kDa	11	8	15	10	12	10	7	7	7	3	6	2	39	34	41	21	26	20	28	26	24	17	27	18	34	43	33	33	32	43
300	Inter-alpha-trypsin inhibitor heavy chain H4 OS=Homo sapiens OX=9606 GN=ITIH4 PE=1 SV=4	Q14624	ITIH4	103 kDa	13	16	18	9	9	11	7	6	6	4	5	0	24	22	33	20	23	24	19	23	29	15	14	13	31	33	31	34	32	40
301	Importin-5 OS=Homo sapiens OX=9606 GN=IPO5 PE=1 SV=4	O00410	IPO5	124 kDa	7	10	7	11	12	10	7	5	6	8	9	8	19	18	21	18	15	20	14	16	24	22	16	18	29	36	26	25	27	26
302	Alpha-1-antichymotrypsin OS=Homo sapiens OX=9606 GN=SERPINA3 PE=1 SV=2	P01011	SERPINA3	48 kDa	10	11	8	4	4	3	7	7	8	3	4	4	26	21	21	17	20	21	18	24	22	14	13	15	19	23	24	26	24	24
303	Proteasome subunit beta type-4 OS=Homo sapiens OX=9606 GN=PSMB4 PE=1 SV=4	P28070	PSMB4	29 kDa	13	16	11	14	12	13	7	13	14	13	12	13	14	13	15	14	12	13	15	16	15	16	14	20	12	9	12	12	13	15
304	Gamma-enolase OS=Homo sapiens OX=9606 GN=ENO2 PE=1 SV=3	P09104	ENO2	47 kDa	4	7	4	7	6	7	7	7	10	6	14	7	13	26	19	17	14	12	12	16	12	10	10	14	15	13	18	18	15	12
305	Glutamate--cysteine ligase regulatory subunit OS=Homo sapiens OX=9606 GN=GCLM PE=1 SV=1	P48507	GCLM	31 kDa	8	8	7	10	8	10	7	10	9	11	10	6	14	14	12	8	12	9	12	12	11	10	4	15	14	16	17	14	12	15
306	26S proteasome non-ATPase regulatory subunit 1 OS=Homo sapiens OX=9606 GN=PSMD1 PE=1 SV=2	Q99460	PSMD1	106 kDa	6	7	9	8	9	8	7	9	9	11	13	11	10	13	14	7	7	8	10	9	8	4	10	11	12	19	20	10	13	10
307	Adenine phosphoribosyltransferase OS=Homo sapiens OX=9606 GN=APRT PE=1 SV=2	P07741	APRT	20 kDa	5	7	5	4	4	9	7	6	7	6	6	7	13	11	11	12	10	10	16	14	12	14	19	12	17	19	13	14	17	14
308	Drebrin-like protein OS=Homo sapiens OX=9606 GN=DBNL PE=1 SV=1	Q9UJU6	DBNL	48 kDa	6	5	6	5	7	7	7	12	8	8	15	12	8	9	12	7	6	8	7	9	8	5	9	6	13	9	13	17	14	11
309	26S proteasome non-ATPase regulatory subunit 6 OS=Homo sapiens OX=9606 GN=PSMD6 PE=1 SV=1	Q15008	PSMD6	46 kDa	2	5	2	7	7	10	7	4	4	6	6	6	4	11	6	3	7	9	9	6	7	10	9	8	17	13	13	14	13	10
310	Endoplasmic reticulum chaperone BiP OS=Homo sapiens OX=9606 GN=HSPA5 PE=1 SV=2	P11021	HSPA5	72 kDa	9	0	0	0	8	8	7	10	13	0	0	0	8	0	11	15	17	15	9	14	8	14	18	17	0	6	0	8	0	5
311	Glyoxylate reductase/hydroxypyruvate reductase OS=Homo sapiens OX=9606 GN=GRHPR PE=1 SV=1	Q9UBQ7	GRHPR	36 kDa	6	3	3	7	4	6	7	6	6	10	8	9	11	8	7	5	6	7	9	11	7	7	7	6	13	10	7	15	11	11
312	F-actin-capping protein subunit alpha-2 OS=Homo sapiens OX=9606 GN=CAPZA2 PE=1 SV=3	P47755	CAPZA2	33 kDa	5	0	0	8	0	4	7	9	8	0	5	7	6	8	0	5	8	9	10	11	8	11	10	7	14	11	13	9	10	9
313	Ubiquitin carboxyl-terminal hydrolase isozyme L3 OS=Homo sapiens OX=9606 GN=UCHL3 PE=1 SV=1	P15374	UCHL3	26 kDa	7	5	8	12	9	3	7	7	5	8	10	6	4	4	8	5	8	9	10	11	9	6	3	5	12	6	12	5	3	11
314	Ubiquitin-associated domain-containing protein 1 OS=Homo sapiens OX=9606 GN=UBAC1 PE=1 SV=1	Q9BSL1	UBAC1	45 kDa	7	9	2	6	5	7	7	6	6	12	8	8	9	10	6	5	7	6	6	6	5	8	8	11	9	12	10	5	5	7
315	Glutathione S-transferase theta-1 OS=Homo sapiens OX=9606 GN=GSTT1 PE=1 SV=4	P30711	GSTT1	27 kDa	7	8	10	6	7	7	7	7	7	9	6	9	8	9	14	7	5	8	0	0	0	0	0	0	8	7	13	12	11	11
316	Rho GTPase-activating protein 1 OS=Homo sapiens OX=9606 GN=ARHGAP1 PE=1 SV=1	Q07960	ARHGAP1	50 kDa	5	0	4	4	5	3	7	9	5	11	9	9	4	6	7	6	4	6	6	8	7	8	9	8	7	6	7	6	3	7
317	Neutrophil elastase OS=Homo sapiens OX=9606 GN=ELANE PE=1 SV=1	P08246	ELANE	29 kDa	2	0	3	3	3	3	7	4	4	0	0	0	8	5	8	11	8	10	6	7	4	8	12	14	9	8	9	6	5	11
318	Platelet basic protein OS=Homo sapiens OX=9606 GN=PPBP PE=1 SV=3	P02775	PPBP	14 kDa	5	7	7	3	4	4	7	9	7	0	0	0	5	6	3	7	9	8	3	0	4	7	10	12	9	7	7	10	8	6
319	Ras-related protein Rab-1B OS=Homo sapiens OX=9606 GN=RAB1B PE=1 SV=1	Q9H0U4	RAB1B	22 kDa	5	5	7	6	7	6	7	7	6	8	8	10	3	7	4	4	6	6	5	4	3	3	5	3	2	6	0	2	2	4
320	Platelet factor 4 OS=Homo sapiens OX=9606 GN=PF4 PE=1 SV=2	P02776	PF4	11 kDa	4	5	3	4	3	8	7	9	9	0	0	0	3	7	4	10	7	8	4	4	4	11	8	9	5	3	7	4	5	5
321	NADH-cytochrome b5 reductase 3 OS=Homo sapiens OX=9606 GN=CYB5R3 PE=1 SV=3	P00387	CYB5R3	34 kDa	3	6	4	3	4	4	7	3	7	2	2	3	4	3	4	5	6	4	2	4	5	6	2	4	2	8	5	3	4	4
322	Bridging integrator 2 OS=Homo sapiens OX=9606 GN=BIN2 PE=1 SV=3	Q9UBW5	BIN2	62 kDa	0	0	0	0	0	0	7	6	5	0	0	0	0	0	0	4	4	6	5	0	4	7	8	6	0	0	0	0	0	0
323	Poly(rC)-binding protein 1 OS=Homo sapiens OX=9606 GN=PCBP1 PE=1 SV=2	Q15365	PCBP1	37 kDa	3	3	3	3	5	3	7	4	5	3	5	4	3	4	7	4	7	4	4	4	4	7	5	6	12	9	9	8	6	10
324	Histone H1.5 OS=Homo sapiens OX=9606 GN=H1-5 PE=1 SV=3	P16401	H1-5	23 kDa	0	0	3	0	0	0	7	9	7	0	0	0	0	0	0	6	5	6	0	0	0	7	11	8	0	0	0	0	0	0
325	Elongation factor 2 OS=Homo sapiens OX=9606 GN=EEF2 PE=1 SV=4	P13639	EEF2	95 kDa	0	0	2	4	0	0	7	0	0	0	0	2	0	4	6	4	3	6	5	0	0	5	5	7	11	7	9	7	7	5
326	Eukaryotic translation initiation factor 6 OS=Homo sapiens OX=9606 GN=EIF6 PE=1 SV=1	P56537	EIF6	27 kDa	8	0	3	7	3	7	7	4	2	8	3	3	5	4	2	0	0	4	2	2	3	4	0	3	4	6	5	6	6	4
327	Inter-alpha-trypsin inhibitor heavy chain H2 OS=Homo sapiens OX=9606 GN=ITIH2 PE=1 SV=2	P19823	ITIH2	106 kDa	8	4	12	5	7	8	6	7	10	7	9	6	20	9	11	7	9	13	9	13	10	5	11	13	25	22	22	23	21	24
328	Porphobilinogen deaminase OS=Homo sapiens OX=9606 GN=HMBS PE=1 SV=2	P08397	HMBS	39 kDa	6	4	8	9	9	10	6	5	9	15	11	16	13	8	12	6	6	9	10	14	9	6	7	9	9	15	9	10	15	13
329	Fructosamine-3-kinase OS=Homo sapiens OX=9606 GN=FN3K PE=1 SV=1	Q9H479	FN3K	35 kDa	8	7	9	8	8	9	6	6	7	4	10	11	9	12	11	13	10	11	15	10	13	10	16	13	17	19	15	19	14	13
330	Kell blood group glycoprotein OS=Homo sapiens OX=9606 GN=KEL PE=1 SV=2	P23276	KEL	83 kDa	11	9	6	16	13	11	6	11	7	11	12	11	14	9	11	9	10	10	13	11	10	9	9	8	12	12	20	9	7	12
331	Annexin A7 OS=Homo sapiens OX=9606 GN=ANXA7 PE=1 SV=3	P20073	ANXA7	53 kDa	6	7	8	6	9	10	6	11	9	14	8	11	13	6	7	11	12	9	10	9	9	11	9	12	13	13	16	11	11	13
332	Cullin-2 OS=Homo sapiens OX=9606 GN=CUL2 PE=1 SV=2	Q13617	CUL2	87 kDa	4	6	8	9	10	5	6	5	7	12	14	13	9	10	6	8	6	6	9	8	10	8	10	8	15	12	10	7	10	11
333	Proteasome activator complex subunit 2 OS=Homo sapiens OX=9606 GN=PSME2 PE=1 SV=4	Q9UL46	PSME2	27 kDa	6	6	7	9	9	10	6	8	5	10	9	6	10	8	10	6	10	10	9	9	6	6	9	7	11	11	10	8	6	11
334	Blood group Rh(CE) polypeptide OS=Homo sapiens OX=9606 GN=RHCE PE=1 SV=2	P18577	RHCE	46 kDa	5	8	8	5	6	8	6	5	7	6	7	7	6	9	8	5	8	7	10	9	4	7	9	6	11	8	6	7	6	7
335	COP9 signalosome complex subunit 3 OS=Homo sapiens OX=9606 GN=COPS3 PE=1 SV=3	Q9UNS2	COPS3	48 kDa	8	3	6	14	8	9	6	9	5	7	10	12	11	9	10	5	5	4	7	12	8	4	6	6	12	8	14	10	10	11
336	Ras-related C3 botulinum toxin substrate 1 OS=Homo sapiens OX=9606 GN=RAC1 PE=1 SV=1	P63000	RAC1	21 kDa	5	4	4	4	3	4	6	10	4	11	7	6	5	9	6	5	8	6	5	10	11	5	7	9	5	6	7	7	3	8
337	Glyoxalase domain-containing protein 4 OS=Homo sapiens OX=9606 GN=GLOD4 PE=1 SV=1	Q9HC38	GLOD4	35 kDa	6	7	5	7	3	5	6	6	10	6	7	10	9	9	8	7	6	6	8	5	7	5	6	10	10	8	12	6	12	10
338	Xaa-Pro dipeptidase OS=Homo sapiens OX=9606 GN=PEPD PE=1 SV=3	P12955	PEPD	55 kDa	7	5	6	9	8	9	6	4	6	6	9	7	8	12	9	5	5	6	9	9	9	5	9	4	10	7	6	7	8	9
339	E3 ubiquitin-protein ligase HUWE1 OS=Homo sapiens OX=9606 GN=HUWE1 PE=1 SV=3	Q7Z6Z7	HUWE1	482 kDa	5	3	0	6	4	5	6	3	4	5	4	6	2	3	2	3	0	7	4	3	3	2	4	3	8	9	10	14	9	15
340	26S proteasome non-ATPase regulatory subunit 4 OS=Homo sapiens OX=9606 GN=PSMD4 PE=1 SV=1	P55036	PSMD4	41 kDa	5	5	5	7	7	6	6	6	6	8	6	9	7	9	8	6	6	7	6	6	6	8	6	5	9	10	7	8	9	7
341	Thioredoxin reductase 1, cytoplasmic OS=Homo sapiens OX=9606 GN=TXNRD1 PE=1 SV=3	Q16881	TXNRD1	71 kDa	5	3	6	4	7	7	6	7	7	5	5	8	5	5	6	4	4	4	7	6	5	4	8	2	6	6	6	6	10	6
342	S-methyl-5'-thioadenosine phosphorylase OS=Homo sapiens OX=9606 GN=MTAP PE=1 SV=2	Q13126	MTAP	31 kDa	4	4	4	5	5	3	6	6	6	5	6	8	6	5	8	8	10	9	8	6	7	9	7	8	7	5	8	6	5	5
343	Puromycin-sensitive aminopeptidase OS=Homo sapiens OX=9606 GN=NPEPPS PE=1 SV=2	P55786	NPEPPS	103 kDa	8	5	6	9	7	5	6	5	6	7	6	4	4	3	4	6	4	3	4	3	3	3	2	2	10	7	13	5	6	4
344	Cell division control protein 42 homolog OS=Homo sapiens OX=9606 GN=CDC42 PE=1 SV=2	P60953	CDC42	21 kDa	3	4	0	3	0	3	6	8	5	4	3	5	8	10	9	5	5	7	7	4	6	10	7	7	3	4	4	4	5	2
345	Cytokine receptor-like factor 3 OS=Homo sapiens OX=9606 GN=CRLF3 PE=1 SV=2	Q8IUI8	CRLF3	50 kDa	6	3	3	6	7	3	6	6	6	5	7	7	5	3	5	5	4	7	5	5	7	5	6	7	6	6	11	7	6	6
346	Pyridoxine-5'-phosphate oxidase OS=Homo sapiens OX=9606 GN=PNPO PE=1 SV=1	Q9NVS9	PNPO	30 kDa	6	6	5	6	7	10	6	7	8	11	10	8	3	4	3	5	4	4	3	3	3	2	4	3	9	9	7	8	5	7
347	Transgelin-2 OS=Homo sapiens OX=9606 GN=TAGLN2 PE=1 SV=3	P37802	TAGLN2	22 kDa	10	3	4	0	0	0	6	10	9	0	3	4	3	2	3	8	8	11	2	2	2	8	11	8	6	2	5	7	2	6
348	Cullin-4A OS=Homo sapiens OX=9606 GN=CUL4A PE=1 SV=3	Q13619	CUL4A	88 kDa	4	5	4	8	5	3	6	6	6	6	7	6	4	6	0	4	6	6	3	4	4	4	3	5	7	6	5	6	5	4
349	Heterogeneous nuclear ribonucleoprotein A1 OS=Homo sapiens OX=9606 GN=HNRNPA1 PE=1 SV=5	P09651	HNRNPA1	39 kDa	3	2	3	5	6	5	6	3	3	0	3	0	6	7	3	4	3	5	6	0	5	9	7	4	5	5	3	0	0	2
350	Annexin A1 OS=Homo sapiens OX=9606 GN=ANXA1 PE=1 SV=2	P04083	ANXA1	39 kDa	6	5	0	6	0	5	6	8	6	0	0	0	6	4	5	6	6	6	6	0	0	9	4	8	2	4	2	2	0	2
351	Myosin light chain 4 OS=Homo sapiens OX=9606 GN=MYL4 PE=1 SV=3	P12829	MYL4	22 kDa	3	2	3	2	2	3	6	3	4	5	2	6	4	3	4	8	10	7	4	5	8	5	4	4	0	2	0	5	3	4
352	Beta-parvin OS=Homo sapiens OX=9606 GN=PARVB PE=1 SV=1	Q9HBI1	PARVB	42 kDa	0	0	0	0	0	0	6	7	5	0	0	0	3	5	0	5	7	9	2	0	2	6	4	6	0	0	5	0	0	0
353	Matrix metalloproteinase-9 OS=Homo sapiens OX=9606 GN=MMP9 PE=1 SV=3	P14780	MMP9	78 kDa	0	0	0	0	0	0	6	10	8	0	0	0	0	0	0	5	6	6	0	3	0	4	6	6	0	0	0	0	0	0
354	cAMP-dependent protein kinase type I-alpha regulatory subunit OS=Homo sapiens OX=9606 GN=PRKAR1A PE=1 SV=1	P10644	PRKAR1A	43 kDa	0	0	0	0	2	2	6	2	2	3	6	5	2	0	2	0	2	0	4	0	4	4	0	0	0	0	5	0	0	0
355	Calreticulin OS=Homo sapiens OX=9606 GN=CALR PE=1 SV=1	P27797	CALR	48 kDa	7	6	5	0	3	0	6	9	6	0	0	0	8	5	5	13	17	6	6	8	6	8	10	14	7	6	6	6	0	6
356	Vitronectin OS=Homo sapiens OX=9606 GN=VTN PE=1 SV=1	P04004	VTN	54 kDa	6	7	6	3	5	4	6	6	3	5	4	0	6	6	6	9	5	7	8	6	6	6	9	4	15	15	15	15	17	11
357	UPF0687 protein C20orf27 OS=Homo sapiens OX=9606 GN=C20orf27 PE=1 SV=3	Q9GZN8	C20orf27	19 kDa	3	4	3	3	5	0	6	3	3	4	4	5	2	2	3	0	3	3	3	2	2	2	3	4	3	3	2	2	3	3
358	Nuclear transport factor 2 OS=Homo sapiens OX=9606 GN=NUTF2 PE=1 SV=1	P61970	NUTF2	14 kDa	6	4	4	6	6	6	6	7	4	5	8	6	7	10	8	8	9	6	12	10	7	5	7	3	13	12	14	8	6	8
359	Serine/threonine-protein phosphatase 2A activator OS=Homo sapiens OX=9606 GN=PTPA PE=1 SV=3	Q15257	PTPA	41 kDa	0	0	0	4	0	4	6	11	6	7	7	7	4	8	0	5	5	7	4	8	6	5	9	5	14	10	12	6	9	12
360	Inorganic pyrophosphatase OS=Homo sapiens OX=9606 GN=PPA1 PE=1 SV=2	Q15181	PPA1	33 kDa	5	5	7	8	8	3	6	4	5	7	12	7	7	7	10	3	0	6	8	5	7	3	0	0	7	9	8	14	7	10
361	Fructose-bisphosphate aldolase C OS=Homo sapiens OX=9606 GN=ALDOC PE=1 SV=2	P09972	ALDOC	39 kDa	0	7	7	11	0	9	6	6	6	8	13	0	0	0	0	0	0	0	0	0	0	0	5	0	0	0	0	0	0	0
362	Guanine nucleotide-binding protein G(i) subunit alpha-2 OS=Homo sapiens OX=9606 GN=GNAI2 PE=1 SV=3	P04899	GNAI2	40 kDa	0	0	0	0	4	3	6	8	4	0	0	0	0	0	0	7	8	5	4	4	5	4	3	8	0	0	0	0	0	0
363	14-3-3 protein gamma OS=Homo sapiens OX=9606 GN=YWHAG PE=1 SV=2	P61981	YWHAG	28 kDa	4	6	10	4	7	3	5	10	5	8	6	5	8	12	6	7	10	9	6	9	9	13	16	11	9	7	10	8	10	11
364	26S proteasome regulatory subunit 7 OS=Homo sapiens OX=9606 GN=PSMC2 PE=1 SV=3	P35998	PSMC2	49 kDa	8	5	10	8	9	7	5	7	7	13	10	11	13	8	10	9	8	10	12	9	9	8	9	9	13	12	15	9	10	9
365	26S proteasome regulatory subunit 6B OS=Homo sapiens OX=9606 GN=PSMC4 PE=1 SV=2	P43686	PSMC4	47 kDa	5	8	4	7	5	3	5	5	5	5	8	4	9	12	10	14	10	13	9	6	8	3	6	9	11	11	11	10	6	10
366	Aldehyde dehydrogenase family 16 member A1 OS=Homo sapiens OX=9606 GN=ALDH16A1 PE=1 SV=2	Q8IZ83	ALDH16A1	85 kDa	6	7	9	13	8	9	5	10	6	10	9	12	5	3	6	8	4	7	10	5	6	7	9	13	11	15	14	7	10	10
367	Platelet-activating factor acetylhydrolase IB subunit beta OS=Homo sapiens OX=9606 GN=PAFAH1B1 PE=1 SV=2	P43034	PAFAH1B1	47 kDa	6	4	5	5	7	8	5	7	5	6	7	8	9	10	10	9	6	8	7	7	4	7	9	9	12	11	13	9	9	14
368	Proteasome subunit alpha type-6 OS=Homo sapiens OX=9606 GN=PSMA6 PE=1 SV=1	P60900	PSMA6	27 kDa	5	8	7	6	6	6	5	8	3	10	6	10	9	8	8	8	9	10	7	10	9	16	14	15	20	15	16	6	3	8
369	Chronophin OS=Homo sapiens OX=9606 GN=PDXP PE=1 SV=2	Q96GD0	PDXP	32 kDa	9	8	8	9	10	7	5	7	6	8	11	13	11	7	8	6	5	6	7	12	8	5	6	7	7	9	9	10	7	7
370	F-actin-capping protein subunit beta OS=Homo sapiens OX=9606 GN=CAPZB PE=1 SV=4	P47756	CAPZB	31 kDa	4	5	5	5	3	6	5	5	6	4	11	3	10	9	6	7	5	6	6	8	8	8	13	11	11	11	7	5	3	5
371	Phosphoribosyl pyrophosphate synthase-associated protein 2 OS=Homo sapiens OX=9606 GN=PRPSAP2 PE=1 SV=1	O60256	PRPSAP2	41 kDa	4	7	6	3	6	5	5	6	3	5	6	6	10	9	8	8	9	6	8	5	9	6	10	8	9	8	12	9	6	12
372	Fatty acid synthase OS=Homo sapiens OX=9606 GN=FASN PE=1 SV=3	P49327	FASN	273 kDa	0	0	0	3	3	3	5	4	2	5	8	7	12	11	13	8	11	6	11	7	10	6	12	7	6	0	4	0	0	3
373	26S proteasome regulatory subunit 8 OS=Homo sapiens OX=9606 GN=PSMC5 PE=1 SV=1	P62195	PSMC5	46 kDa	6	5	3	8	4	3	5	4	5	5	8	2	7	8	6	7	5	5	5	6	6	6	10	6	5	11	11	8	3	7
374	COP9 signalosome complex subunit 5 OS=Homo sapiens OX=9606 GN=COPS5 PE=1 SV=4	Q92905	COPS5	38 kDa	5	6	7	4	5	4	5	2	3	5	7	9	4	6	8	4	3	0	8	8	10	7	6	2	15	11	9	3	6	8
375	Fumarate hydratase, mitochondrial OS=Homo sapiens OX=9606 GN=FH PE=1 SV=3	P07954	FH	55 kDa	6	5	4	4	8	7	5	6	5	5	7	6	5	5	4	4	6	5	0	8	3	0	5	2	14	9	9	6	4	10
376	Translin OS=Homo sapiens OX=9606 GN=TSN PE=1 SV=1	Q15631	TSN	26 kDa	5	6	3	5	5	7	5	10	6	6	5	4	3	3	5	5	7	6	4	3	3	6	10	7	8	9	9	5	9	8
377	Eukaryotic translation initiation factor 2 subunit 3 OS=Homo sapiens OX=9606 GN=EIF2S3 PE=1 SV=3	P41091	EIF2S3	51 kDa	3	6	5	4	5	4	5	4	5	3	3	6	6	5	4	4	4	3	8	3	4	6	6	9	7	9	4	7	7	5
378	Aspartate--tRNA ligase, cytoplasmic OS=Homo sapiens OX=9606 GN=DARS1 PE=1 SV=2	P14868	DARS1	57 kDa	3	4	3	2	3	5	5	4	6	6	4	6	6	2	6	5	2	2	8	4	8	10	8	3	6	6	5	4	2	4
379	Adenosine kinase OS=Homo sapiens OX=9606 GN=ADK PE=1 SV=2	P55263	ADK	41 kDa	0	6	3	4	6	4	5	3	4	6	8	7	5	6	4	3	4	6	3	3	5	3	3	5	6	6	5	5	3	5
380	Coronin-1A OS=Homo sapiens OX=9606 GN=CORO1A PE=1 SV=4	P31146	CORO1A	51 kDa	0	0	0	0	0	0	5	5	4	0	0	0	5	5	4	8	12	9	7	9	7	6	10	9	3	4	5	4	4	3
381	Myeloblastin OS=Homo sapiens OX=9606 GN=PRTN3 PE=1 SV=3	P24158	PRTN3	28 kDa	2	5	0	4	4	3	5	4	6	0	0	0	6	3	4	9	6	8	8	4	6	6	5	10	9	6	7	3	3	4
382	ATP-binding cassette sub-family B member 6 OS=Homo sapiens OX=9606 GN=ABCB6 PE=1 SV=1	Q9NP58	ABCB6	94 kDa	5	5	3	4	6	3	5	4	4	3	6	4	6	4	4	2	3	4	6	3	5	4	3	3	6	7	6	4	4	4
383	Cathepsin G OS=Homo sapiens OX=9606 GN=CTSG PE=1 SV=2	P08311	CTSG	29 kDa	3	2	3	3	5	3	5	9	5	0	0	0	3	7	5	3	3	6	3	4	4	6	8	9	7	4	8	3	4	5
384	LIM and SH3 domain protein 1 OS=Homo sapiens OX=9606 GN=LASP1 PE=1 SV=2	Q14847	LASP1	30 kDa	4	4	3	3	0	0	5	3	7	4	0	5	0	0	0	6	8	0	2	0	4	2	4	4	0	0	0	3	0	0
385	CB1 cannabinoid receptor-interacting protein 1 OS=Homo sapiens OX=9606 GN=CNRIP1 PE=1 SV=1	Q96F85	CNRIP1	19 kDa	3	4	6	4	5	4	5	3	5	4	4	3	4	5	4	4	4	3	3	3	5	4	3	2	0	3	3	0	0	0
386	Glutathione synthetase OS=Homo sapiens OX=9606 GN=GSS PE=1 SV=1	P48637	GSS	52 kDa	2	2	2	0	0	0	5	4	3	4	2	4	0	0	3	3	4	3	2	0	0	6	4	2	7	7	8	4	6	7
387	GMP reductase 2 OS=Homo sapiens OX=9606 GN=GMPR2 PE=1 SV=1	Q9P2T1	GMPR2	38 kDa	5	6	3	0	0	0	5	6	3	4	5	3	7	9	7	5	7	10	6	7	6	8	6	5	6	4	7	7	3	0
388	Density-regulated protein OS=Homo sapiens OX=9606 GN=DENR PE=1 SV=2	O43583	DENR	22 kDa	5	2	4	4	4	3	5	3	2	4	7	5	3	4	6	2	4	5	5	8	3	3	4	4	3	3	5	6	7	6
389	Integrin-linked protein kinase OS=Homo sapiens OX=9606 GN=ILK PE=1 SV=2	Q13418	ILK	51 kDa	0	0	0	0	0	0	5	6	0	0	0	0	0	0	0	4	7	12	0	0	0	10	7	4	0	0	0	0	0	0
390	Zinc-alpha-2-glycoprotein OS=Homo sapiens OX=9606 GN=AZGP1 PE=1 SV=2	P25311	AZGP1	34 kDa	6	6	7	4	6	6	5	4	0	0	0	0	11	12	11	7	5	3	7	11	12	3	2	3	11	10	13	13	13	14
391	Serine/threonine-protein kinase OSR1 OS=Homo sapiens OX=9606 GN=OXSR1 PE=1 SV=1	O95747	OXSR1	58 kDa	2	3	3	7	6	5	5	5	4	5	4	5	6	8	4	3	2	4	5	6	5	5	4	4	5	9	9	5	5	7
392	Apolipoprotein E OS=Homo sapiens OX=9606 GN=APOE PE=1 SV=1	P02649	APOE	36 kDa	4	2	2	0	2	0	5	7	6	0	3	4	5	6	7	4	7	6	6	5	5	5	3	3	11	11	8	8	12	6
393	Ras-related protein Rap-2b OS=Homo sapiens OX=9606 GN=RAP2B PE=1 SV=1	P61225	RAP2B	21 kDa	0	0	0	0	0	0	5	0	0	0	4	3	0	3	0	3	3	0	0	0	0	2	0	0	0	0	0	0	0	0
394	Proteasome subunit beta type-3 OS=Homo sapiens OX=9606 GN=PSMB3 PE=1 SV=2	P49720	PSMB3	23 kDa	4	5	8	3	5	5	5	5	6	7	10	6	6	7	7	0	6	5	5	5	6	7	5	4	14	13	13	11	9	6
395	Alpha-1-acid glycoprotein 1 OS=Homo sapiens OX=9606 GN=ORM1 PE=1 SV=1	P02763	ORM1	24 kDa	4	5	4	6	7	6	5	6	5	2	3	5	13	12	12	9	7	9	11	10	9	7	9	10	13	14	12	13	15	11
396	Sarcoplasmic/endoplasmic reticulum calcium ATPase 3 OS=Homo sapiens OX=9606 GN=ATP2A3 PE=1 SV=3	Q93084	ATP2A3	109 kDa	0	0	0	0	0	0	5	0	0	0	0	0	0	0	0	0	3	4	0	0	0	3	4	5	0	0	0	0	0	0
397	Lactoylglutathione lyase OS=Homo sapiens OX=9606 GN=GLO1 PE=1 SV=4	Q04760	GLO1	21 kDa	6	7	10	12	13	9	5	5	6	7	6	5	16	18	15	10	8	10	12	11	14	4	8	4	10	9	8	11	11	9
398	Arginase-1 OS=Homo sapiens OX=9606 GN=ARG1 PE=1 SV=2	P05089	ARG1	35 kDa	4	0	6	5	3	6	5	5	5	6	4	3	6	6	6	5	8	8	4	5	4	4	7	10	4	5	3	3	4	3
399	Neutrophil gelatinase-associated lipocalin OS=Homo sapiens OX=9606 GN=LCN2 PE=1 SV=2	P80188	LCN2	23 kDa	0	4	0	0	3	0	5	5	5	0	0	0	3	8	4	10	4	4	4	3	3	9	6	7	3	2	3	3	0	3
400	Aflatoxin B1 aldehyde reductase member 2 OS=Homo sapiens OX=9606 GN=AKR7A2 PE=1 SV=3	O43488	AKR7A2	40 kDa	3	2	3	5	2	4	5	2	4	2	5	7	3	2	2	4	4	2	2	4	8	2	4	2	4	4	5	2	3	4
401	Histone H3.3 OS=Homo sapiens OX=9606 GN=H3-3A PE=1 SV=2	P84243	H3-3A	15 kDa	2	0	6	5	0	3	5	5	4	2	0	4	2	0	2	0	6	4	6	5	0	5	11	11	3	5	5	0	0	6
402	Plasma protease C1 inhibitor OS=Homo sapiens OX=9606 GN=SERPING1 PE=1 SV=2	P05155	SERPING1	55 kDa	8	7	7	7	5	4	4	8	4	4	4	3	14	19	11	12	12	11	25	16	16	7	14	5	23	18	18	18	20	22
403	Proteasome subunit beta type-5 OS=Homo sapiens OX=9606 GN=PSMB5 PE=1 SV=3	P28074	PSMB5	28 kDa	10	8	8	7	9	5	4	6	5	6	13	11	17	12	15	12	8	10	9	9	13	12	20	16	13	12	14	8	8	9
404	Fumarylacetoacetase OS=Homo sapiens OX=9606 GN=FAH PE=1 SV=2	P16930	FAH	46 kDa	6	3	8	7	6	7	4	4	4	7	11	6	15	8	7	6	2	3	11	11	13	6	4	9	17	12	15	9	10	9
405	ATP-dependent 6-phosphofructokinase, muscle type OS=Homo sapiens OX=9606 GN=PFKM PE=1 SV=2	P08237	PFKM	85 kDa	0	4	5	3	4	3	4	8	7	11	10	11	8	11	8	5	4	10	7	3	6	10	10	12	11	9	14	7	8	9
406	Protein diaphanous homolog 1 OS=Homo sapiens OX=9606 GN=DIAPH1 PE=1 SV=2	O60610	DIAPH1	141 kDa	4	0	0	2	3	3	4	6	13	4	9	4	9	3	3	6	6	6	10	13	8	4	12	11	9	10	12	12	7	9
407	AP-2 complex subunit alpha-1 OS=Homo sapiens OX=9606 GN=AP2A1 PE=1 SV=3	O95782	AP2A1	108 kDa	0	4	4	3	6	3	4	5	2	6	4	3	6	6	7	6	7	5	7	10	8	12	6	9	13	8	15	9	8	7
408	26S proteasome regulatory subunit 6A OS=Homo sapiens OX=9606 GN=PSMC3 PE=1 SV=3	P17980	PSMC3	49 kDa	5	3	4	4	6	9	4	2	2	9	11	5	7	7	5	7	4	5	5	3	6	3	4	4	5	6	6	5	8	7
409	Basigin OS=Homo sapiens OX=9606 GN=BSG PE=1 SV=2	P35613	BSG	42 kDa	5	5	7	6	5	6	4	7	6	5	6	5	4	6	4	4	4	5	6	6	5	7	4	4	4	0	2	3	3	5
410	Sec1 family domain-containing protein 1 OS=Homo sapiens OX=9606 GN=SCFD1 PE=1 SV=4	Q8WVM8	SCFD1	72 kDa	4	3	4	2	2	4	4	5	3	5	3	7	4	4	4	5	5	2	3	7	6	7	5	4	5	7	7	4	3	6
411	Latent-transforming growth factor beta-binding protein 1 OS=Homo sapiens OX=9606 GN=LTBP1 PE=1 SV=4	Q14766	LTBP1	187 kDa	0	0	0	0	0	0	4	4	7	0	0	0	5	3	3	5	8	5	3	3	9	7	7	6	0	0	0	0	0	0
412	Protein S100-A8 OS=Homo sapiens OX=9606 GN=S100A8 PE=1 SV=1	P05109	S100A8	11 kDa	5	5	5	3	3	4	4	3	6	0	0	0	3	7	4	6	4	4	4	7	3	5	9	6	6	9	5	5	0	4
413	Prolyl endopeptidase OS=Homo sapiens OX=9606 GN=PREP PE=1 SV=2	P48147	PREP	81 kDa	2	2	0	3	2	0	4	3	5	4	8	7	4	4	5	3	4	5	4	3	3	2	2	0	5	5	12	7	6	5
414	Protein SGT1 homolog OS=Homo sapiens OX=9606 GN=SUGT1 PE=1 SV=3	Q9Y2Z0	SUGT1	41 kDa	0	3	2	4	5	3	4	4	4	5	3	3	3	3	3	0	2	3	3	4	3	3	5	2	8	5	7	6	9	4
415	26S proteasome regulatory subunit 10B OS=Homo sapiens OX=9606 GN=PSMC6 PE=1 SV=1	P62333	PSMC6	44 kDa	4	3	4	2	0	3	4	3	2	4	3	0	4	2	5	2	2	4	3	0	2	2	4	5	5	4	7	4	5	3
416	Peptidyl-prolyl cis-trans isomerase NIMA-interacting 1 OS=Homo sapiens OX=9606 GN=PIN1 PE=1 SV=1	Q13526	PIN1	18 kDa	3	0	3	5	4	4	4	4	2	3	4	5	3	3	5	0	6	3	5	4	6	2	2	0	2	4	7	6	6	4
417	Sorbitol dehydrogenase OS=Homo sapiens OX=9606 GN=SORD PE=1 SV=4	Q00796	SORD	38 kDa	0	0	0	3	3	0	4	3	4	5	10	12	0	2	0	0	0	0	7	6	3	3	8	9	3	4	3	0	0	3
418	Protein phosphatase methylesterase 1 OS=Homo sapiens OX=9606 GN=PPME1 PE=1 SV=3	Q9Y570	PPME1	42 kDa	0	0	0	0	0	4	4	0	3	0	5	0	3	3	5	2	2	0	3	3	0	0	3	3	12	6	9	7	6	7
419	Actin-related protein 3 OS=Homo sapiens OX=9606 GN=ACTR3 PE=1 SV=3	P61158	ACTR3	47 kDa	5	3	3	0	0	0	4	3	6	0	0	0	4	0	3	2	5	3	4	3	3	4	6	3	0	2	3	3	2	2
420	Ras-related protein Rab-21 OS=Homo sapiens OX=9606 GN=RAB21 PE=1 SV=3	Q9UL25	RAB21	24 kDa	5	3	3	3	4	3	4	4	3	4	2	3	3	4	4	4	4	5	4	4	3	2	3	3	4	4	4	4	3	4
421	Guanine nucleotide-binding protein G(i) subunit alpha-3 OS=Homo sapiens OX=9606 GN=GNAI3 PE=1 SV=3	P08754	GNAI3	41 kDa	0	2	5	0	3	2	4	6	0	0	0	5	0	0	0	0	0	2	0	0	0	0	0	0	0	0	0	0	0	0
422	Keratin, type I cytoskeletal 9 OS=Homo sapiens OX=9606 GN=KRT9 PE=1 SV=3	P35527	KRT9	62 kDa	5	2	4	33	29	31	4	4	8	8	10	5	3	3	0	121	121	123	10	9	12	0	2	0	21	17	17	14	15	14
423	Actin-related protein 2/3 complex subunit 1B OS=Homo sapiens OX=9606 GN=ARPC1B PE=1 SV=3	O15143	ARPC1B	41 kDa	0	0	0	0	0	0	4	3	4	0	0	0	2	5	3	7	7	9	0	2	0	8	5	8	3	0	2	0	4	0
424	26S proteasome regulatory subunit 4 OS=Homo sapiens OX=9606 GN=PSMC1 PE=1 SV=1	P62191	PSMC1	49 kDa	4	5	6	6	6	7	4	5	4	4	7	7	7	6	11	9	4	6	5	4	9	6	5	9	7	8	5	5	4	6
425	Exportin-2 OS=Homo sapiens OX=9606 GN=CSE1L PE=1 SV=3	P55060	CSE1L	110 kDa	2	2	2	7	0	3	4	4	5	5	5	8	7	8	5	6	3	5	6	5	4	3	6	4	5	7	6	4	4	6
426	UTP--glucose-1-phosphate uridylyltransferase OS=Homo sapiens OX=9606 GN=UGP2 PE=1 SV=5	Q16851	UGP2	57 kDa	3	3	3	5	6	4	4	2	0	4	6	7	6	4	7	0	4	4	4	6	4	0	4	6	8	6	12	6	5	11
427	Heterogeneous nuclear ribonucleoprotein K OS=Homo sapiens OX=9606 GN=HNRNPK PE=1 SV=1	P61978	HNRNPK	51 kDa	0	0	3	5	4	3	4	3	6	6	3	3	7	6	6	6	2	6	7	6	7	9	6	6	10	9	10	11	14	11
428	Polypyrimidine tract-binding protein 1 OS=Homo sapiens OX=9606 GN=PTBP1 PE=1 SV=1	P26599	PTBP1	57 kDa	2	2	0	0	0	0	4	3	3	0	2	0	3	2	4	2	3	3	4	2	3	3	3	3	2	4	5	3	3	2
429	26S proteasome non-ATPase regulatory subunit 13 OS=Homo sapiens OX=9606 GN=PSMD13 PE=1 SV=2	Q9UNM6	PSMD13	43 kDa	3	6	3	3	8	6	4	5	5	4	3	6	8	7	10	6	7	8	10	7	6	9	9	6	13	10	9	8	7	9
430	Proteasome subunit alpha type-3 OS=Homo sapiens OX=9606 GN=PSMA3 PE=1 SV=2	P25788	PSMA3	28 kDa	5	3	3	4	4	4	4	3	5	7	3	4	4	4	5	6	3	4	4	5	6	10	4	3	6	10	8	10	8	8
431	HLA class I histocompatibility antigen, B alpha chain OS=Homo sapiens OX=9606 GN=HLA-B PE=1 SV=3	P01889	HLA-B	40 kDa	0	0	0	0	0	0	4	2	4	0	0	0	0	0	0	5	5	0	0	0	0	0	4	3	0	0	0	0	0	0
432	Phospholipid hydroperoxide glutathione peroxidase OS=Homo sapiens OX=9606 GN=GPX4 PE=1 SV=3	P36969	GPX4	22 kDa	5	7	0	4	5	6	4	0	0	4	5	5	9	6	5	0	8	3	4	6	6	0	0	2	2	3	0	2	0	0
433	Microtubule-associated protein RP/EB family member 1 OS=Homo sapiens OX=9606 GN=MAPRE1 PE=1 SV=3	Q15691	MAPRE1	30 kDa	3	4	2	7	3	5	4	5	4	5	8	4	8	7	9	8	7	6	6	8	10	6	7	9	7	3	4	9	9	9
434	AP-2 complex subunit beta OS=Homo sapiens OX=9606 GN=AP2B1 PE=1 SV=1	P63010	AP2B1	105 kDa	0	4	0	3	3	3	4	2	3	4	2	3	2	3	0	0	0	0	5	3	3	10	8	6	7	6	5	0	3	4
435	UMP-CMP kinase OS=Homo sapiens OX=9606 GN=CMPK1 PE=1 SV=3	P30085	CMPK1	22 kDa	5	4	2	5	4	6	4	3	5	3	10	9	8	7	7	5	5	5	8	7	9	14	8	9	12	10	10	8	9	7
436	Ras-related protein Rab-35 OS=Homo sapiens OX=9606 GN=RAB35 PE=1 SV=1	Q15286	RAB35	23 kDa	0	0	0	0	0	3	4	3	2	0	0	0	0	0	0	0	0	0	0	0	0	0	0	0	0	0	0	0	0	0
437	Retinol-binding protein 4 OS=Homo sapiens OX=9606 GN=RBP4 PE=1 SV=3	P02753	RBP4	23 kDa	3	3	3	0	3	3	4	4	3	0	0	0	6	5	5	5	3	3	4	4	5	3	3	3	7	12	5	10	5	8
438	Methylosome subunit pICln OS=Homo sapiens OX=9606 GN=CLNS1A PE=1 SV=1	P54105	CLNS1A	26 kDa	0	4	0	0	0	4	4	3	0	0	2	0	0	0	0	0	0	2	0	0	0	6	0	0	3	0	5	2	2	6
439	Thymosin beta-4 OS=Homo sapiens OX=9606 GN=TMSB4X PE=1 SV=2	P62328	TMSB4X	5 kDa	0	0	0	0	0	0	4	5	0	0	0	0	0	0	2	5	5	5	0	0	2	6	4	0	0	0	0	2	0	0
440	Elongation factor 1-gamma OS=Homo sapiens OX=9606 GN=EEF1G PE=1 SV=3	P26641	EEF1G	50 kDa	0	0	0	0	0	0	4	4	2	2	0	0	0	0	0	0	0	0	3	2	3	5	2	3	0	0	0	0	0	0
441	4-trimethylaminobutyraldehyde dehydrogenase OS=Homo sapiens OX=9606 GN=ALDH9A1 PE=1 SV=3	P49189	ALDH9A1	54 kDa	3	2	3	2	0	0	4	2	0	2	4	3	5	7	9	5	4	10	5	4	3	11	3	4	10	9	9	5	5	7
442	6-phosphogluconolactonase OS=Homo sapiens OX=9606 GN=PGLS PE=1 SV=2	O95336	PGLS	28 kDa	3	2	6	6	3	7	4	0	2	8	2	4	3	4	2	2	5	2	9	5	5	3	5	4	4	4	3	4	3	2
443	Plasma membrane calcium-transporting ATPase 4 OS=Homo sapiens OX=9606 GN=ATP2B4 PE=1 SV=2	P23634	ATP2B4	138 kDa	3	6	6	13	7	10	3	5	4	9	14	15	9	8	8	4	5	4	7	8	8	3	5	5	6	5	6	5	7	5
444	Ammonium transporter Rh type A OS=Homo sapiens OX=9606 GN=RHAG PE=1 SV=2	Q02094	RHAG	44 kDa	3	5	3	4	8	6	3	3	2	8	7	7	10	4	4	4	5	5	6	8	9	6	5	8	6	7	5	7	5	3
445	S-phase kinase-associated protein 1 OS=Homo sapiens OX=9606 GN=SKP1 PE=1 SV=2	P63208	SKP1	19 kDa	2	4	0	6	5	5	3	3	0	6	5	5	3	3	6	6	3	5	6	5	4	2	2	0	7	4	3	5	5	6
446	Protein disulfide-isomerase OS=Homo sapiens OX=9606 GN=P4HB PE=1 SV=3	P07237	P4HB	57 kDa	0	0	2	0	3	3	3	3	3	2	0	0	6	4	2	8	8	6	3	4	0	7	10	9	7	6	6	4	5	0
447	Endonuclease domain-containing 1 protein OS=Homo sapiens OX=9606 GN=ENDOD1 PE=1 SV=2	O94919	ENDOD1	55 kDa	3	2	2	2	0	0	3	3	2	2	4	5	9	4	9	2	4	5	8	4	6	5	8	6	7	3	7	4	4	4
448	Synembryn-A OS=Homo sapiens OX=9606 GN=RIC8A PE=1 SV=3	Q9NPQ8	RIC8A	60 kDa	0	0	6	3	8	3	3	3	3	9	7	11	5	5	6	3	6	7	4	7	2	3	5	2	0	0	3	0	0	0
449	Aldo-keto reductase family 1 member A1 OS=Homo sapiens OX=9606 GN=AKR1A1 PE=1 SV=3	P14550	AKR1A1	37 kDa	2	3	3	3	2	3	3	4	3	3	3	3	5	4	3	5	4	3	4	2	3	3	4	4	6	7	5	6	3	5
450	Glutathione S-transferase LANCL1 OS=Homo sapiens OX=9606 GN=LANCL1 PE=1 SV=1	O43813	LANCL1	45 kDa	2	4	2	4	2	2	3	2	2	3	2	4	5	5	7	4	5	4	4	4	3	0	6	6	7	4	8	4	4	9
451	Myosin light polypeptide 6 OS=Homo sapiens OX=9606 GN=MYL6 PE=1 SV=2	P60660	MYL6	17 kDa	4	5	0	0	0	0	3	3	3	0	0	0	0	3	3	4	2	4	2	3	3	4	5	2	0	2	0	2	0	0
452	Guanine nucleotide-binding protein G(I)/G(S)/G(T) subunit beta-1 OS=Homo sapiens OX=9606 GN=GNB1 PE=1 SV=3	P62873	GNB1	37 kDa	0	0	0	2	0	3	3	2	0	0	2	2	0	0	0	0	0	2	0	0	0	0	4	0	2	2	2	0	0	2
453	Clusterin OS=Homo sapiens OX=9606 GN=CLU PE=1 SV=1	P10909	CLU	52 kDa	7	6	8	4	5	5	3	4	5	6	4	3	11	7	9	8	7	6	9	10	11	4	5	8	14	13	17	15	13	16
454	Tryptophan--tRNA ligase, cytoplasmic OS=Homo sapiens OX=9606 GN=WARS1 PE=1 SV=2	P23381	WARS1	53 kDa	0	0	0	2	0	2	3	0	0	2	2	4	3	3	5	5	2	2	4	2	3	2	8	0	7	4	6	5	3	6
455	Rabankyrin-5 OS=Homo sapiens OX=9606 GN=ANKFY1 PE=1 SV=2	Q9P2R3	ANKFY1	128 kDa	3	0	2	3	0	2	3	0	2	0	4	5	0	2	0	0	0	0	0	2	2	3	3	2	3	3	4	4	3	4
456	Casein kinase I isoform alpha OS=Homo sapiens OX=9606 GN=CSNK1A1 PE=1 SV=2	P48729	CSNK1A1	39 kDa	7	2	3	5	3	4	3	4	4	8	10	4	4	5	6	2	3	0	3	3	5	2	4	4	7	4	8	5	4	6
457	C4b-binding protein alpha chain OS=Homo sapiens OX=9606 GN=C4BPA PE=1 SV=2	P04003	C4BPA	67 kDa	6	5	3	3	0	3	3	3	2	0	0	0	17	17	16	11	10	10	13	13	13	7	9	8	14	17	20	24	21	19
458	Actin-related protein 2 OS=Homo sapiens OX=9606 GN=ACTR2 PE=1 SV=1	P61160	ACTR2	45 kDa	0	0	0	0	0	2	3	2	7	0	0	0	2	4	2	5	5	5	4	2	0	3	3	3	5	4	2	4	2	2
459	Ketosamine-3-kinase OS=Homo sapiens OX=9606 GN=FN3KRP PE=1 SV=2	Q9HA64	FN3KRP	34 kDa	5	7	4	5	5	5	3	4	4	5	6	7	7	7	6	8	6	6	10	5	8	6	7	5	6	8	11	8	7	8
460	Nascent polypeptide-associated complex subunit alpha, muscle-specific form OS=Homo sapiens OX=9606 GN=NACA PE=1 SV=1	E9PAV3	NACA	205 kDa	6	0	0	7	6	3	3	5	3	3	5	2	0	0	0	3	4	0	7	3	3	5	4	3	5	6	4	2	3	0
461	Dynamin-2 OS=Homo sapiens OX=9606 GN=DNM2 PE=1 SV=2	P50570	DNM2	98 kDa	3	3	4	3	4	4	3	3	2	6	5	4	4	2	0	3	4	3	4	3	6	0	3	6	5	3	7	6	7	0
462	Glucosamine-6-phosphate isomerase 1 OS=Homo sapiens OX=9606 GN=GNPDA1 PE=1 SV=1	P46926	GNPDA1	33 kDa	3	3	4	4	4	4	3	4	3	3	5	5	4	6	4	4	6	4	2	3	3	0	3	3	4	2	4	2	2	4
463	Proteasome inhibitor PI31 subunit OS=Homo sapiens OX=9606 GN=PSMF1 PE=1 SV=2	Q92530	PSMF1	30 kDa	3	2	0	6	0	5	3	2	5	4	5	2	3	5	4	3	3	4	5	3	3	3	6	5	7	5	7	6	5	4
464	Phosphatidylinositol transfer protein beta isoform OS=Homo sapiens OX=9606 GN=PITPNB PE=1 SV=2	P48739	PITPNB	32 kDa	2	0	2	0	4	0	3	4	4	3	0	3	5	5	10	8	3	0	7	8	8	3	5	6	0	8	4	8	0	7
465	Caveolae-associated protein 2 OS=Homo sapiens OX=9606 GN=CAVIN2 PE=1 SV=3	O95810	CAVIN2	47 kDa	0	0	0	0	0	0	3	2	2	0	0	0	0	3	4	3	8	6	0	0	0	0	0	4	0	0	0	0	0	0
466	Cysteine and glycine-rich protein 1 OS=Homo sapiens OX=9606 GN=CSRP1 PE=1 SV=3	P21291	CSRP1	21 kDa	0	0	0	0	0	0	3	3	4	0	0	0	0	2	3	3	0	2	0	0	0	0	3	0	0	0	0	0	0	0
467	Dynactin subunit 1 OS=Homo sapiens OX=9606 GN=DCTN1 PE=1 SV=3	Q14203	DCTN1	142 kDa	5	2	9	8	11	8	3	4	3	6	7	7	13	17	16	19	15	18	10	11	12	14	11	9	12	10	7	9	5	12
468	Serine/threonine-protein phosphatase 6 regulatory subunit 1 OS=Homo sapiens OX=9606 GN=PPP6R1 PE=1 SV=5	Q9UPN7	PPP6R1	97 kDa	4	5	3	5	4	0	3	6	4	0	3	3	4	4	0	4	4	2	0	0	0	3	0	5	3	0	0	3	0	0
469	Coagulation factor XII OS=Homo sapiens OX=9606 GN=F12 PE=1 SV=3	P00748	F12	68 kDa	2	0	4	0	0	0	3	3	4	0	0	0	10	10	7	3	6	5	4	5	6	4	2	0	5	3	4	6	7	7
470	Thymidylate kinase OS=Homo sapiens OX=9606 GN=DTYMK PE=1 SV=4	P23919	DTYMK	24 kDa	2	3	3	4	4	3	3	0	3	4	4	3	3	3	0	3	0	0	3	3	4	0	2	3	4	5	4	5	4	0
471	Transforming protein RhoA OS=Homo sapiens OX=9606 GN=RHOA PE=1 SV=1	P61586	RHOA	22 kDa	4	2	0	3	4	0	3	5	0	0	0	0	2	3	3	3	6	4	0	4	0	2	8	7	0	0	0	0	0	3
472	Proteasome subunit beta type-6 OS=Homo sapiens OX=9606 GN=PSMB6 PE=1 SV=4	P28072	PSMB6	25 kDa	2	0	4	4	0	0	3	0	0	4	4	5	6	7	4	0	0	0	3	4	2	0	7	6	11	7	7	5	3	9
473	Bifunctional coenzyme A synthase OS=Homo sapiens OX=9606 GN=COASY PE=1 SV=4	Q13057	COASY	62 kDa	2	3	2	2	0	2	3	3	2	4	2	2	5	3	3	3	4	2	2	5	5	3	2	4	5	3	4	3	2	3
474	Galectin-3 OS=Homo sapiens OX=9606 GN=LGALS3 PE=1 SV=5	P17931	LGALS3	26 kDa	0	0	0	5	10	7	3	5	3	4	3	4	5	5	7	7	4	7	4	5	4	0	0	0	10	6	4	6	6	9
475	CYFIP-related Rac1 interactor B OS=Homo sapiens OX=9606 GN=CYRIB PE=1 SV=1	Q9NUQ9	CYRIB	37 kDa	4	4	4	5	3	4	3	5	3	4	4	0	6	2	2	5	5	3	3	4	4	5	5	4	3	4	5	2	4	2
476	Thioredoxin domain-containing protein 17 OS=Homo sapiens OX=9606 GN=TXNDC17 PE=1 SV=1	Q9BRA2	TXNDC17	14 kDa	2	2	0	0	2	5	3	2	3	2	5	4	4	2	3	3	2	2	4	3	3	3	3	0	5	5	6	6	6	6
477	Apolipoprotein L1 OS=Homo sapiens OX=9606 GN=APOL1 PE=1 SV=5	O14791	APOL1	44 kDa	2	3	2	3	3	0	3	2	2	0	0	0	4	3	4	5	5	6	4	4	4	2	3	4	3	3	3	5	3	5
478	Vacuolar protein sorting-associated protein VTA1 homolog OS=Homo sapiens OX=9606 GN=VTA1 PE=1 SV=1	Q9NP79	VTA1	34 kDa	0	2	3	0	0	3	3	2	3	0	0	0	2	3	0	4	2	4	2	0	0	0	4	4	2	2	4	0	5	3
479	CD44 antigen OS=Homo sapiens OX=9606 GN=CD44 PE=1 SV=3	P16070	CD44	82 kDa	3	2	2	2	3	2	3	4	2	2	3	4	3	3	3	2	4	4	4	0	0	3	0	0	7	3	4	3	4	3
480	Cytosolic acyl coenzyme A thioester hydrolase OS=Homo sapiens OX=9606 GN=ACOT7 PE=1 SV=3	O00154	ACOT7	42 kDa	3	0	2	0	2	2	3	2	2	3	4	2	2	0	0	4	3	3	2	3	0	3	0	3	7	3	0	2	3	2
481	Platelet glycoprotein Ib alpha chain OS=Homo sapiens OX=9606 GN=GP1BA PE=1 SV=2	P07359	GP1BA	72 kDa	0	0	0	0	0	0	3	2	3	0	0	0	0	0	0	3	5	2	0	0	0	5	2	2	0	0	0	0	0	0
482	Guanylate kinase OS=Homo sapiens OX=9606 GN=GUK1 PE=1 SV=2	Q16774	GUK1	22 kDa	3	0	2	6	3	4	3	4	3	7	4	5	5	4	3	0	0	2	0	0	0	2	0	2	0	0	4	0	0	0
483	Perilipin-3 OS=Homo sapiens OX=9606 GN=PLIN3 PE=1 SV=3	O60664	PLIN3	47 kDa	7	5	3	2	6	4	3	3	2	6	7	7	10	10	11	6	6	6	5	4	7	7	6	5	4	6	7	8	5	6
484	Ubiquitin-conjugating enzyme E2 K OS=Homo sapiens OX=9606 GN=UBE2K PE=1 SV=3	P61086	UBE2K	22 kDa	0	3	2	4	2	2	3	2	3	0	4	0	0	0	0	0	0	0	3	2	0	0	0	0	3	3	3	3	3	2
485	IST1 homolog OS=Homo sapiens OX=9606 GN=IST1 PE=1 SV=1	P53990	IST1	40 kDa	0	0	0	3	3	4	3	0	0	5	4	3	0	0	0	6	0	6	0	6	2	4	0	6	0	0	2	0	0	3
486	Calcium-regulated heat-stable protein 1 OS=Homo sapiens OX=9606 GN=CARHSP1 PE=1 SV=2	Q9Y2V2	CARHSP1	16 kDa	0	0	0	0	8	0	3	4	7	7	0	0	0	0	0	0	0	0	0	0	0	0	0	2	0	0	0	0	0	2
487	Ubiquitin-like-conjugating enzyme ATG3 OS=Homo sapiens OX=9606 GN=ATG3 PE=1 SV=1	Q9NT62	ATG3	36 kDa	0	0	2	4	0	0	3	0	0	0	4	0	0	0	0	4	5	4	0	0	0	0	0	0	0	5	2	0	0	0
488	Macrophage migration inhibitory factor OS=Homo sapiens OX=9606 GN=MIF PE=1 SV=4	P14174	MIF	12 kDa	4	2	0	0	3	3	3	2	2	0	2	3	4	0	0	0	4	4	3	0	0	3	3	3	3	4	3	3	0	2
489	Serum paraoxonase/arylesterase 1 OS=Homo sapiens OX=9606 GN=PON1 PE=1 SV=3	P27169	PON1	40 kDa	0	0	0	0	0	0	3	2	0	0	0	0	3	3	5	3	0	5	2	2	4	3	3	3	11	8	7	10	9	12
490	Ras-related protein Rab-2B OS=Homo sapiens OX=9606 GN=RAB2B PE=1 SV=1	Q8WUD1	RAB2B	24 kDa	0	0	0	2	0	0	3	0	0	0	0	0	0	0	0	0	0	0	0	0	0	0	0	0	0	0	0	0	0	0
491	Hsp90 co-chaperone Cdc37 OS=Homo sapiens OX=9606 GN=CDC37 PE=1 SV=1	Q16543	CDC37	44 kDa	0	0	0	0	0	0	3	0	2	0	3	3	3	0	4	3	5	4	2	0	0	4	2	2	3	0	2	0	0	0
492	Ras-related protein Rab-5A OS=Homo sapiens OX=9606 GN=RAB5A PE=1 SV=2	P20339	RAB5A	24 kDa	0	2	0	0	0	0	3	3	3	4	0	0	0	0	0	0	0	0	0	0	0	0	0	0	0	0	0	0	0	0
493	Solute carrier family 2, facilitated glucose transporter member 14 OS=Homo sapiens OX=9606 GN=SLC2A14 PE=1 SV=1	Q8TDB8	SLC2A14	56 kDa	0	0	0	0	0	0	2	3	2	0	0	0	0	0	0	4	3	2	0	0	0	0	3	0	0	5	0	0	0	2
494	Cysteine--tRNA ligase, cytoplasmic OS=Homo sapiens OX=9606 GN=CARS1 PE=1 SV=3	P49589	CARS1	85 kDa	0	0	0	0	0	0	2	0	0	0	3	0	2	2	3	2	3	0	5	3	4	6	3	4	3	0	0	0	0	2
495	Translationally-controlled tumor protein OS=Homo sapiens OX=9606 GN=TPT1 PE=1 SV=1	P13693	TPT1	20 kDa	2	2	2	3	2	2	2	4	2	2	2	2	2	2	2	4	2	2	2	4	2	2	2	2	2	2	2	2	2	0
496	Annexin A6 OS=Homo sapiens OX=9606 GN=ANXA6 PE=1 SV=3	P08133	ANXA6	76 kDa	0	0	0	0	0	0	2	0	3	0	0	0	0	0	0	0	2	0	0	0	0	0	3	5	0	0	0	0	0	3
497	Gamma-aminobutyric acid receptor-associated protein-like 2 OS=Homo sapiens OX=9606 GN=GABARAPL2 PE=1 SV=1	P60520	GABARAPL2	14 kDa	0	2	0	2	0	0	2	0	4	0	0	0	3	0	0	0	0	0	0	0	0	4	2	3	4	9	3	4	3	0
498	ATP synthase subunit beta, mitochondrial OS=Homo sapiens OX=9606 GN=ATP5F1B PE=1 SV=3	P06576	ATP5F1B	57 kDa	0	0	0	0	0	0	2	3	2	0	0	0	0	0	0	2	3	5	0	0	0	0	3	2	0	0	0	0	0	0
499	COP9 signalosome complex subunit 2 OS=Homo sapiens OX=9606 GN=COPS2 PE=1 SV=1	P61201	COPS2	52 kDa	0	0	2	3	10	9	2	3	3	4	12	15	0	0	0	0	0	3	3	7	3	3	4	4	13	13	13	7	5	8
500	Thimet oligopeptidase OS=Homo sapiens OX=9606 GN=THOP1 PE=1 SV=2	P52888	THOP1	79 kDa	0	0	0	4	4	0	2	4	5	6	6	5	0	3	0	0	0	0	3	0	4	2	2	2	4	2	2	2	4	4
501	RuvB-like 2 OS=Homo sapiens OX=9606 GN=RUVBL2 PE=1 SV=3	Q9Y230	RUVBL2	51 kDa	6	2	0	5	4	4	2	2	3	2	4	4	3	6	5	0	4	3	9	7	6	12	14	8	16	16	10	10	11	9
502	Actin-related protein 2/3 complex subunit 4 OS=Homo sapiens OX=9606 GN=ARPC4 PE=1 SV=3	P59998	ARPC4	20 kDa	0	0	0	0	0	0	2	0	0	0	0	0	0	0	0	3	2	2	0	0	0	0	2	0	0	0	0	0	0	0
503	WW domain-binding protein 2 OS=Homo sapiens OX=9606 GN=WBP2 PE=1 SV=1	Q969T9	WBP2	28 kDa	3	4	2	2	3	3	2	4	8	9	11	8	4	5	7	5	4	0	6	2	0	3	7	5	6	7	4	10	6	12
504	Regulator of G-protein signaling 10 OS=Homo sapiens OX=9606 GN=RGS10 PE=1 SV=3	O43665	RGS10	21 kDa	0	0	0	0	0	0	2	0	3	2	3	2	2	0	0	2	0	4	0	2	0	4	3	0	4	4	0	0	2	4
505	60 kDa heat shock protein, mitochondrial OS=Homo sapiens OX=9606 GN=HSPD1 PE=1 SV=2	P10809	HSPD1	61 kDa	3	0	2	0	4	5	2	3	3	0	0	0	4	6	3	6	5	7	0	2	2	0	8	2	0	4	0	0	0	5
506	Carboxymethylenebutenolidase homolog OS=Homo sapiens OX=9606 GN=CMBL PE=1 SV=1	Q96DG6	CMBL	28 kDa	0	0	4	5	4	2	2	5	2	9	4	4	4	4	6	0	4	5	3	4	5	3	3	6	4	6	7	2	5	3
507	Grancalcin OS=Homo sapiens OX=9606 GN=GCA PE=1 SV=2	P28676	GCA	24 kDa	0	0	0	0	0	0	2	0	2	0	0	0	0	0	0	0	2	4	0	0	0	3	0	0	0	0	0	0	0	0
508	Protein AMBP OS=Homo sapiens OX=9606 GN=AMBP PE=1 SV=1	P02760	AMBP	39 kDa	8	4	4	0	0	0	2	3	0	0	0	0	5	7	4	9	6	5	6	7	4	2	0	7	15	13	11	14	11	11
509	Apolipoprotein D OS=Homo sapiens OX=9606 GN=APOD PE=1 SV=1	P05090	APOD	21 kDa	4	5	3	0	0	0	2	0	3	3	0	0	6	7	4	0	0	3	2	3	0	2	0	2	8	7	6	6	6	8
510	Translin-associated protein X OS=Homo sapiens OX=9606 GN=TSNAX PE=1 SV=1	Q99598	TSNAX	33 kDa	0	2	0	0	2	0	2	2	2	3	0	2	3	2	2	2	3	2	2	2	2	2	2	2	4	5	2	2	2	3
511	Y-box-binding protein 3 OS=Homo sapiens OX=9606 GN=YBX3 PE=1 SV=4	P16989	YBX3	40 kDa	0	0	0	2	0	0	2	2	4	3	4	3	3	0	2	0	0	0	0	0	0	0	2	0	0	0	0	0	0	0
512	Zyxin OS=Homo sapiens OX=9606 GN=ZYX PE=1 SV=1	Q15942	ZYX	61 kDa	0	3	0	0	0	0	2	2	4	0	0	0	7	3	7	7	7	5	2	3	4	4	5	7	3	0	0	0	0	0
513	Epidermal growth factor receptor substrate 15 OS=Homo sapiens OX=9606 GN=EPS15 PE=1 SV=2	P42566	EPS15	99 kDa	3	0	0	5	4	4	2	3	0	4	5	3	2	2	3	5	3	2	4	5	2	0	0	0	3	3	4	5	0	6
514	Insulin-degrading enzyme OS=Homo sapiens OX=9606 GN=IDE PE=1 SV=4	P14735	IDE	118 kDa	0	3	2	3	2	4	2	0	0	9	6	5	4	3	6	0	4	0	5	5	3	0	2	3	4	0	2	5	4	2
515	Equilibrative nucleoside transporter 1 OS=Homo sapiens OX=9606 GN=SLC29A1 PE=1 SV=3	Q99808	SLC29A1	50 kDa	3	0	0	0	0	3	2	2	3	4	5	3	3	2	3	0	0	0	4	3	5	3	2	4	7	7	6	7	6	3
516	V-type proton ATPase subunit B, brain isoform OS=Homo sapiens OX=9606 GN=ATP6V1B2 PE=1 SV=3	P21281	ATP6V1B2	57 kDa	2	0	0	2	2	3	2	0	0	2	3	0	7	4	3	3	2	3	2	6	5	0	4	5	4	6	6	10	6	7
517	Aspartyl aminopeptidase OS=Homo sapiens OX=9606 GN=DNPEP PE=1 SV=2	Q9ULA0	DNPEP	53 kDa	0	0	0	0	0	0	2	3	0	2	2	0	4	7	8	3	3	2	4	3	7	3	0	2	8	11	10	4	0	5
518	Aldo-keto reductase family 1 member B1 OS=Homo sapiens OX=9606 GN=AKR1B1 PE=1 SV=3	P15121	AKR1B1	36 kDa	0	0	0	0	0	0	2	0	0	2	0	0	2	2	5	0	2	2	0	3	0	2	2	0	0	0	0	0	0	0
519	Calnexin OS=Homo sapiens OX=9606 GN=CANX PE=1 SV=2	P27824	CANX	68 kDa	0	0	0	0	0	0	2	0	2	0	0	0	0	0	0	0	2	0	0	0	0	0	3	0	0	0	0	0	0	0
520	Isocitrate dehydrogenase [NADP] cytoplasmic OS=Homo sapiens OX=9606 GN=IDH1 PE=1 SV=2	O75874	IDH1	47 kDa	2	2	3	2	6	2	2	5	2	2	3	3	8	4	6	5	6	3	5	5	0	3	4	3	2	0	3	0	2	0
521	V-type proton ATPase subunit H OS=Homo sapiens OX=9606 GN=ATP6V1H PE=1 SV=1	Q9UI12	ATP6V1H	56 kDa	0	0	0	0	2	3	2	0	0	0	3	2	4	6	3	0	4	3	2	3	3	0	3	0	2	7	3	4	4	2
522	Cystatin-B OS=Homo sapiens OX=9606 GN=CSTB PE=1 SV=2	P04080	CSTB	11 kDa	0	3	0	3	3	2	2	4	0	0	2	4	4	8	4	4	4	3	4	5	0	5	4	2	5	4	5	4	4	5
523	Heterogeneous nuclear ribonucleoprotein H OS=Homo sapiens OX=9606 GN=HNRNPH1 PE=1 SV=4	P31943	HNRNPH1	49 kDa	0	0	0	4	0	0	2	2	0	0	0	0	0	3	0	0	0	0	5	2	0	3	0	0	5	6	5	5	0	3
524	BolA-like protein 2 OS=Homo sapiens OX=9606 GN=BOLA2 PE=1 SV=1	Q9H3K6	BOLA2	10 kDa	3	3	3	3	0	0	2	4	3	0	0	3	5	2	4	3	4	5	3	2	2	0	2	2	3	4	3	4	4	5
525	26S proteasome non-ATPase regulatory subunit 14 OS=Homo sapiens OX=9606 GN=PSMD14 PE=1 SV=1	O00487	PSMD14	35 kDa	0	2	0	4	0	0	2	0	0	2	6	4	3	0	6	5	9	6	6	3	5	3	0	4	6	4	6	5	5	5
526	Tyrosine--tRNA ligase, cytoplasmic OS=Homo sapiens OX=9606 GN=YARS1 PE=1 SV=4	P54577	YARS1	59 kDa	0	0	0	0	2	3	2	3	3	0	0	0	5	6	5	6	5	5	8	9	8	9	10	8	3	4	4	4	3	0
527	Erythroid membrane-associated protein OS=Homo sapiens OX=9606 GN=ERMAP PE=1 SV=1	Q96PL5	ERMAP	53 kDa	3	0	0	0	3	2	2	4	2	4	4	6	0	2	3	2	2	0	5	6	4	3	4	2	4	7	4	4	4	3
528	Alpha-2-antiplasmin OS=Homo sapiens OX=9606 GN=SERPINF2 PE=1 SV=3	P08697	SERPINF2	55 kDa	4	6	6	3	2	0	2	3	4	0	0	0	12	9	12	7	10	8	9	7	6	4	5	9	15	14	14	16	16	21
529	Isocitrate dehydrogenase [NADP], mitochondrial OS=Homo sapiens OX=9606 GN=IDH2 PE=1 SV=2	P48735	IDH2	51 kDa	0	0	0	0	0	0	2	4	4	0	0	0	0	0	0	0	5	0	0	0	0	2	0	0	0	0	0	0	0	0
530	Hemoglobin subunit gamma-2 OS=Homo sapiens OX=9606 GN=HBG2 PE=1 SV=2	P69892	HBG2	16 kDa	0	0	215	0	0	0	0	0	0	0	0	0	0	211	0	0	0	0	418	453	486	486	483	491	1125	1418	1363	1247	1293	1319
531	Haptoglobin-related protein OS=Homo sapiens OX=9606 GN=HPR PE=2 SV=2	P00739	HPR	39 kDa	0	0	0	0	0	0	0	0	0	0	0	0	64	62	71	54	51	49	55	50	48	40	0	39	34	0	0	48	48	49
532	Immunoglobulin lambda-1 light chain OS=Homo sapiens OX=9606 PE=1 SV=1	P0DOX8	P0DOX8	23 kDa	25	0	0	0	0	0	0	0	0	0	0	0	0	0	0	0	31	30	0	0	0	0	20	30	17	23	23	0	0	21
533	Spectrin beta chain, non-erythrocytic 2 OS=Homo sapiens OX=9606 GN=SPTBN2 PE=1 SV=3	O15020	SPTBN2	271 kDa	0	0	0	0	0	0	0	0	0	0	0	0	0	0	0	0	24	0	0	0	0	0	0	0	0	0	0	0	0	0
534	Tropomyosin beta chain OS=Homo sapiens OX=9606 GN=TPM2 PE=1 SV=1	P07951	TPM2	33 kDa	0	0	0	0	0	0	0	0	21	0	0	0	0	0	0	28	24	0	0	0	0	0	0	0	0	0	0	0	0	0
535	Immunoglobulin heavy constant gamma 4 OS=Homo sapiens OX=9606 GN=IGHG4 PE=1 SV=1	P01861	IGHG4	36 kDa	0	13	14	0	0	0	0	16	15	0	0	0	24	23	0	15	13	18	0	0	0	0	0	0	0	23	0	20	19	23
536	Ankyrin-2 OS=Homo sapiens OX=9606 GN=ANK2 PE=1 SV=4	Q01484	ANK2	434 kDa	0	0	0	0	0	0	0	0	0	0	0	0	0	0	0	0	0	0	0	0	0	0	0	0	0	20	0	0	0	0
537	Titin OS=Homo sapiens OX=9606 GN=TTN PE=1 SV=4	Q8WZ42	TTN	3816 kDa	0	0	0	0	0	0	0	0	0	0	2	0	0	0	0	0	0	0	0	0	0	0	0	0	0	0	0	0	0	0
538	Tubulin alpha-4A chain OS=Homo sapiens OX=9606 GN=TUBA4A PE=1 SV=1	P68366	TUBA4A	50 kDa	0	0	0	0	0	0	0	0	0	0	0	0	0	11	10	0	23	26	0	0	0	0	27	26	12	0	0	0	0	0
539	Myosin-10 OS=Homo sapiens OX=9606 GN=MYH10 PE=1 SV=3	P35580	MYH10	229 kDa	0	0	0	0	0	0	0	0	0	0	0	0	13	11	16	23	28	26	0	0	0	0	0	18	0	0	0	0	0	0
540	Radixin OS=Homo sapiens OX=9606 GN=RDX PE=1 SV=1	P35241	RDX	69 kDa	0	0	0	0	0	0	0	0	0	0	0	0	0	0	0	0	0	0	0	0	0	0	0	0	0	0	0	0	0	12
541	Ezrin OS=Homo sapiens OX=9606 GN=EZR PE=1 SV=4	P15311	EZR	69 kDa	0	0	0	0	0	0	0	0	0	0	11	0	13	11	0	0	0	11	8	11	0	0	17	0	11	13	17	0	0	12
542	Heparin cofactor 2 OS=Homo sapiens OX=9606 GN=SERPIND1 PE=1 SV=3	P05546	SERPIND1	57 kDa	7	8	5	6	5	10	0	3	4	0	2	0	18	16	14	12	10	14	16	13	15	10	10	8	10	7	8	16	14	13
543	Ribose-phosphate pyrophosphokinase 2 OS=Homo sapiens OX=9606 GN=PRPS2 PE=1 SV=2	P11908	PRPS2	35 kDa	0	0	0	0	0	0	0	0	0	0	0	0	0	0	0	0	0	0	0	0	0	0	0	0	11	0	14	11	14	12
544	Eukaryotic initiation factor 4A-II OS=Homo sapiens OX=9606 GN=EIF4A2 PE=1 SV=2	Q14240	EIF4A2	46 kDa	8	8	0	7	7	8	0	7	0	8	9	0	12	11	14	11	10	8	10	8	13	7	0	11	10	14	17	12	11	10
545	Complement C5 OS=Homo sapiens OX=9606 GN=C5 PE=1 SV=4	P01031	C5	188 kDa	5	5	6	0	0	3	0	0	3	0	0	0	15	13	10	5	10	11	7	10	9	2	3	0	15	16	16	18	14	19
546	Serine/threonine-protein phosphatase 2A 65 kDa regulatory subunit A beta isoform OS=Homo sapiens OX=9606 GN=PPP2R1B PE=1 SV=3	P30154	PPP2R1B	66 kDa	0	0	0	10	6	0	0	0	0	0	0	0	0	0	0	0	0	0	0	0	0	0	0	0	12	14	14	14	11	12
547	Phosphatidylinositol transfer protein alpha isoform OS=Homo sapiens OX=9606 GN=PITPNA PE=1 SV=2	Q00169	PITPNA	32 kDa	6	8	9	6	6	10	0	6	8	5	8	8	7	10	12	7	11	8	8	11	7	6	6	7	7	10	5	6	6	7
548	Histidine-rich glycoprotein OS=Homo sapiens OX=9606 GN=HRG PE=1 SV=1	P04196	HRG	60 kDa	4	3	2	0	0	0	0	0	0	0	0	0	17	16	16	7	6	5	8	9	10	0	5	0	14	17	11	18	15	18
549	Nucleosome assembly protein 1-like 1 OS=Homo sapiens OX=9606 GN=NAP1L1 PE=1 SV=1	P55209	NAP1L1	45 kDa	0	0	0	0	0	0	0	0	0	5	5	6	9	10	10	0	0	12	6	7	8	0	11	12	7	12	9	16	6	9
550	DCN1-like protein 1 OS=Homo sapiens OX=9606 GN=DCUN1D1 PE=1 SV=1	Q96GG9	DCUN1D1	30 kDa	4	5	5	4	6	3	0	0	2	7	9	8	8	0	4	2	0	2	3	5	0	2	6	2	11	8	8	7	6	12
551	Blood group Rh(D) polypeptide OS=Homo sapiens OX=9606 GN=RHD PE=1 SV=3	Q02161	RHD	45 kDa	0	0	0	0	6	0	0	0	0	0	0	0	0	0	0	0	0	0	0	0	0	0	0	0	0	0	0	0	0	0
552	GTPase-activating protein and VPS9 domain-containing protein 1 OS=Homo sapiens OX=9606 GN=GAPVD1 PE=1 SV=2	Q14C86	GAPVD1	165 kDa	0	0	0	0	3	2	0	0	3	2	7	5	6	4	10	0	4	6	6	5	6	2	7	10	13	18	15	14	11	14
553	Beta-2-glycoprotein 1 OS=Homo sapiens OX=9606 GN=APOH PE=1 SV=3	P02749	APOH	38 kDa	0	2	0	0	0	0	0	0	0	0	0	0	8	6	10	6	4	5	9	3	3	0	4	5	14	9	14	14	19	13
554	26S proteasome non-ATPase regulatory subunit 11 OS=Homo sapiens OX=9606 GN=PSMD11 PE=1 SV=3	O00231	PSMD11	47 kDa	8	3	2	4	5	6	0	6	6	2	5	6	7	5	6	5	7	6	7	4	7	8	5	6	11	13	9	5	5	8
555	Alpha-centractin OS=Homo sapiens OX=9606 GN=ACTR1A PE=1 SV=1	P61163	ACTR1A	43 kDa	3	2	0	2	3	3	0	0	0	2	3	3	8	8	10	8	8	8	4	5	6	4	4	9	5	7	15	6	5	7
556	Keratin, type I cytoskeletal 14 OS=Homo sapiens OX=9606 GN=KRT14 PE=1 SV=4	P02533	KRT14	52 kDa	0	0	0	8	7	11	0	0	0	0	3	0	0	0	0	31	39	38	4	3	3	0	0	0	3	2	2	2	2	6
557	Alpha-1-acid glycoprotein 2 OS=Homo sapiens OX=9606 GN=ORM2 PE=1 SV=2	P19652	ORM2	24 kDa	3	3	0	0	2	3	0	0	0	0	0	0	6	10	8	4	4	6	7	8	5	5	5	3	9	8	12	10	14	14
558	Protein arginine N-methyltransferase 5 OS=Homo sapiens OX=9606 GN=PRMT5 PE=1 SV=4	O14744	PRMT5	73 kDa	0	3	0	6	9	8	0	5	5	6	4	7	6	6	5	3	6	5	10	3	5	2	2	3	2	7	8	2	2	0
559	Afamin OS=Homo sapiens OX=9606 GN=AFM PE=1 SV=1	P43652	AFM	69 kDa	0	0	0	0	0	0	0	0	0	0	0	0	10	6	9	2	3	2	5	3	4	0	0	0	12	15	10	13	13	18
560	Keratin, type I cytoskeletal 16 OS=Homo sapiens OX=9606 GN=KRT16 PE=1 SV=4	P08779	KRT16	51 kDa	0	0	0	8	8	12	0	0	0	0	0	0	0	0	0	27	35	33	4	0	0	0	0	0	0	0	0	0	0	0
561	Keratin, type II cytoskeletal 6A OS=Homo sapiens OX=9606 GN=KRT6A PE=1 SV=3	P02538	KRT6A	60 kDa	0	0	0	0	0	0	0	0	0	0	0	0	0	0	0	30	27	31	0	0	0	0	0	0	0	0	0	0	0	0
562	Ras-related protein Rap-1A OS=Homo sapiens OX=9606 GN=RAP1A PE=1 SV=1	P62834	RAP1A	21 kDa	7	0	0	4	4	6	0	0	0	6	8	7	5	5	6	0	0	0	0	0	0	0	0	0	0	0	0	0	0	0
563	Probable ubiquitin carboxyl-terminal hydrolase FAF-Y OS=Homo sapiens OX=9606 GN=USP9Y PE=2 SV=2	O00507	USP9Y	291 kDa	0	0	0	0	0	0	0	0	0	0	0	0	0	0	0	0	0	0	0	0	0	0	0	0	0	0	0	0	0	8
564	14-3-3 protein eta OS=Homo sapiens OX=9606 GN=YWHAH PE=1 SV=4	Q04917	YWHAH	28 kDa	0	0	0	3	0	0	0	4	2	0	0	0	7	0	4	5	0	0	0	0	0	0	4	6	4	7	6	6	0	6
565	Alcohol dehydrogenase class-3 OS=Homo sapiens OX=9606 GN=ADH5 PE=1 SV=4	P11766	ADH5	40 kDa	2	5	4	0	3	4	0	0	0	4	7	4	7	4	6	5	7	3	6	5	4	3	6	4	5	5	6	9	4	6
566	Cytosol aminopeptidase OS=Homo sapiens OX=9606 GN=LAP3 PE=1 SV=3	P28838	LAP3	56 kDa	0	0	0	0	0	0	0	0	0	0	0	0	0	4	4	5	4	6	3	4	0	8	8	6	9	7	11	11	10	11
567	NIF3-like protein 1 OS=Homo sapiens OX=9606 GN=NIF3L1 PE=1 SV=2	Q9GZT8	NIF3L1	42 kDa	0	0	3	0	0	0	0	0	0	0	3	0	0	0	0	0	5	0	0	0	0	0	0	0	6	6	6	0	0	4
568	Neutrophil defensin 1 OS=Homo sapiens OX=9606 GN=DEFA1 PE=1 SV=1	P59665	DEFA1	10 kDa	0	0	2	2	4	0	0	3	2	0	0	0	8	4	3	5	5	5	4	3	3	7	13	8	5	3	2	2	5	4
569	Rieske domain-containing protein OS=Homo sapiens OX=9606 GN=RFESD PE=1 SV=1	Q8TAC1	RFESD	18 kDa	0	6	0	4	3	7	0	0	0	8	8	0	5	7	4	3	0	0	3	5	5	0	0	0	6	6	5	4	0	4
570	Poly(rC)-binding protein 2 OS=Homo sapiens OX=9606 GN=PCBP2 PE=1 SV=1	Q15366	PCBP2	39 kDa	0	0	0	0	0	0	0	0	0	0	0	0	0	0	0	0	0	0	0	0	0	0	0	0	10	7	0	0	0	0
571	UV excision repair protein RAD23 homolog B OS=Homo sapiens OX=9606 GN=RAD23B PE=1 SV=1	P54727	RAD23B	43 kDa	3	5	0	4	0	0	0	4	0	4	0	0	0	3	2	0	4	4	0	0	0	5	5	0	3	4	5	7	6	2
572	Corticosteroid-binding globulin OS=Homo sapiens OX=9606 GN=SERPINA6 PE=1 SV=1	P08185	SERPINA6	45 kDa	4	5	4	4	2	5	0	0	2	0	0	0	6	5	8	3	3	4	6	5	6	3	4	4	7	5	5	7	3	5
573	Sorcin OS=Homo sapiens OX=9606 GN=SRI PE=1 SV=1	P30626	SRI	22 kDa	3	3	3	2	2	5	0	4	4	5	4	6	5	3	4	5	6	3	0	3	2	0	6	3	3	5	5	0	4	2
574	Importin-9 OS=Homo sapiens OX=9606 GN=IPO9 PE=1 SV=3	Q96P70	IPO9	116 kDa	0	0	0	2	0	0	0	0	0	2	0	0	4	4	4	2	0	2	4	3	5	6	7	5	9	10	7	7	5	10
575	ATP-dependent 6-phosphofructokinase, platelet type OS=Homo sapiens OX=9606 GN=PFKP PE=1 SV=2	Q01813	PFKP	86 kDa	0	0	0	0	0	0	0	0	0	0	0	0	4	4	4	5	8	6	0	4	5	6	10	7	0	0	0	0	0	0
576	Ubiquitin-like protein ISG15 OS=Homo sapiens OX=9606 GN=ISG15 PE=1 SV=5	P05161	ISG15	18 kDa	0	0	0	0	0	0	0	0	0	0	0	0	4	4	2	5	4	5	4	4	6	3	8	8	12	7	8	7	7	5
577	Dynactin subunit 2 OS=Homo sapiens OX=9606 GN=DCTN2 PE=1 SV=4	Q13561	DCTN2	44 kDa	4	3	4	5	6	6	0	2	0	4	3	3	5	4	3	4	4	5	3	3	3	3	3	0	3	3	5	4	4	2
578	Axin interactor, dorsalization-associated protein OS=Homo sapiens OX=9606 GN=AIDA PE=1 SV=1	Q96BJ3	AIDA	35 kDa	0	2	0	3	5	3	0	0	3	4	10	6	0	3	3	0	0	2	3	3	3	3	0	2	2	3	0	0	0	2
579	Complement component C9 OS=Homo sapiens OX=9606 GN=C9 PE=1 SV=2	P02748	C9	63 kDa	4	2	4	3	2	2	0	0	0	0	0	0	7	6	7	8	8	6	6	8	4	4	4	6	3	0	0	4	4	5
580	Complement C1r subcomponent OS=Homo sapiens OX=9606 GN=C1R PE=1 SV=2	P00736	C1R	80 kDa	0	3	0	0	0	0	0	0	0	0	0	0	6	8	8	3	2	4	5	5	5	3	3	3	7	11	5	6	8	10
581	Protein phosphatase 1 regulatory subunit 7 OS=Homo sapiens OX=9606 GN=PPP1R7 PE=1 SV=1	Q15435	PPP1R7	42 kDa	0	2	0	3	5	0	0	2	0	6	3	4	4	4	4	0	2	0	8	6	5	3	5	3	5	5	3	3	4	5
582	Angiotensinogen OS=Homo sapiens OX=9606 GN=AGT PE=1 SV=1	P01019	AGT	53 kDa	3	3	0	0	0	0	0	0	0	0	0	0	3	3	0	3	4	2	0	3	2	0	0	4	11	7	13	11	13	6
583	1,4-alpha-glucan-branching enzyme OS=Homo sapiens OX=9606 GN=GBE1 PE=1 SV=3	Q04446	GBE1	80 kDa	0	3	4	2	5	0	0	0	0	3	5	5	6	4	6	3	4	3	0	7	3	2	5	6	4	4	2	4	0	3
584	Gamma-glutamylcyclotransferase OS=Homo sapiens OX=9606 GN=GGCT PE=1 SV=1	O75223	GGCT	21 kDa	0	0	0	0	0	0	0	0	0	4	6	4	2	0	0	0	0	0	0	0	0	0	3	0	5	6	6	0	4	0
585	Complement C1s subcomponent OS=Homo sapiens OX=9606 GN=C1S PE=1 SV=1	P09871	C1S	77 kDa	2	0	4	0	0	0	0	0	0	0	0	0	4	5	7	7	4	7	6	4	4	2	0	5	4	6	6	9	8	6
586	Reticulon-3 OS=Homo sapiens OX=9606 GN=RTN3 PE=1 SV=2	O95197	RTN3	113 kDa	0	0	0	0	0	0	0	0	0	0	0	0	0	0	0	0	0	0	0	0	0	3	0	0	0	0	0	0	0	0
587	LanC-like protein 2 OS=Homo sapiens OX=9606 GN=LANCL2 PE=1 SV=1	Q9NS86	LANCL2	51 kDa	0	0	2	0	0	2	0	0	2	3	0	0	8	8	6	2	0	0	0	4	2	3	2	0	6	6	5	7	5	3
588	Immunoglobulin kappa variable 3-20 OS=Homo sapiens OX=9606 GN=IGKV3-20 PE=1 SV=2	P01619	IGKV3-20	13 kDa	0	0	0	0	0	0	0	0	0	0	0	0	3	6	4	3	3	4	6	4	5	2	0	3	5	5	4	5	6	4
589	Vasodilator-stimulated phosphoprotein OS=Homo sapiens OX=9606 GN=VASP PE=1 SV=3	P50552	VASP	40 kDa	0	0	0	0	0	0	0	2	2	0	0	0	3	0	4	0	6	5	0	3	3	5	9	7	0	2	0	3	0	3
590	Eosinophil peroxidase OS=Homo sapiens OX=9606 GN=EPX PE=1 SV=2	P11678	EPX	81 kDa	0	0	0	4	3	0	0	4	3	0	0	0	5	0	6	5	5	4	0	0	0	0	0	0	5	5	0	10	7	10
591	CAD protein OS=Homo sapiens OX=9606 GN=CAD PE=1 SV=3	P27708	CAD	243 kDa	0	0	0	0	0	0	0	0	0	0	0	0	6	3	0	0	5	0	0	0	0	0	2	0	11	10	13	12	8	5
592	Complement C1q subcomponent subunit B OS=Homo sapiens OX=9606 GN=C1QB PE=1 SV=3	P02746	C1QB	27 kDa	0	0	0	0	0	0	0	0	0	0	0	0	5	3	6	3	2	0	2	0	0	0	0	0	18	12	11	8	9	8
593	Optineurin OS=Homo sapiens OX=9606 GN=OPTN PE=1 SV=3	Q96CV9	OPTN	66 kDa	0	2	0	0	0	0	0	0	0	0	3	0	3	4	5	7	6	0	3	3	0	4	0	0	6	6	2	5	3	5
594	Heat shock protein beta-1 OS=Homo sapiens OX=9606 GN=HSPB1 PE=1 SV=2	P04792	HSPB1	23 kDa	3	0	5	5	0	4	0	0	4	0	0	0	0	0	2	6	6	4	3	0	0	5	8	8	0	0	0	0	0	2
595	Protein phosphatase 1A OS=Homo sapiens OX=9606 GN=PPM1A PE=1 SV=1	P35813	PPM1A	42 kDa	0	0	0	0	0	3	0	0	3	0	4	0	4	4	4	0	0	2	0	0	0	0	0	0	6	2	6	3	3	6
596	Platelet-activating factor acetylhydrolase IB subunit alpha2 OS=Homo sapiens OX=9606 GN=PAFAH1B2 PE=1 SV=1	P68402	PAFAH1B2	26 kDa	0	4	0	3	0	0	0	0	0	3	3	6	4	0	2	2	0	2	2	0	0	0	2	0	6	2	3	6	2	5
597	L-xylulose reductase OS=Homo sapiens OX=9606 GN=DCXR PE=1 SV=2	Q7Z4W1	DCXR	26 kDa	0	0	0	0	0	0	0	0	0	0	3	0	5	0	5	0	0	0	5	0	0	0	0	0	6	7	4	4	6	3
598	Vitamin K-dependent protein S OS=Homo sapiens OX=9606 GN=PROS1 PE=1 SV=1	P07225	PROS1	75 kDa	0	0	0	0	0	0	0	0	0	0	0	0	6	5	4	6	3	6	3	4	6	2	2	4	4	3	3	3	4	3
599	Keratin, type II cytoskeletal 5 OS=Homo sapiens OX=9606 GN=KRT5 PE=1 SV=3	P13647	KRT5	62 kDa	0	0	0	0	0	4	0	0	0	0	0	0	0	0	0	13	16	16	0	0	0	0	0	0	0	0	0	0	0	0
600	Annexin A4 OS=Homo sapiens OX=9606 GN=ANXA4 PE=1 SV=4	P09525	ANXA4	36 kDa	2	0	0	0	2	0	0	2	0	0	5	2	5	4	4	3	3	4	2	0	3	3	0	5	0	0	0	0	3	0
601	Eukaryotic translation initiation factor 4B OS=Homo sapiens OX=9606 GN=EIF4B PE=1 SV=2	P23588	EIF4B	69 kDa	3	3	4	4	4	2	0	0	0	4	3	4	3	0	3	3	4	0	3	0	4	0	2	4	4	2	0	0	2	4
602	Complement component C7 OS=Homo sapiens OX=9606 GN=C7 PE=1 SV=2	P10643	C7	94 kDa	0	0	0	0	0	0	0	0	0	0	0	0	4	2	3	2	0	0	0	0	0	0	0	0	4	5	7	9	13	14
603	Glutaredoxin-3 OS=Homo sapiens OX=9606 GN=GLRX3 PE=1 SV=2	O76003	GLRX3	37 kDa	0	2	0	0	3	0	0	4	2	2	6	2	4	0	4	0	0	2	3	4	0	0	0	2	6	6	4	5	2	3
604	Tyrosine-protein phosphatase non-receptor type 11 OS=Homo sapiens OX=9606 GN=PTPN11 PE=1 SV=3	Q06124	PTPN11	68 kDa	0	0	0	0	2	0	0	4	0	4	3	0	5	0	3	4	3	3	2	3	4	0	6	6	0	5	0	2	0	0
605	NEDD8 OS=Homo sapiens OX=9606 GN=NEDD8 PE=1 SV=1	Q15843	NEDD8	9 kDa	0	0	0	0	2	3	0	0	0	0	0	3	4	5	4	0	5	4	4	3	0	0	0	0	4	5	3	5	3	4
606	Complement C1q subcomponent subunit C OS=Homo sapiens OX=9606 GN=C1QC PE=1 SV=3	P02747	C1QC	26 kDa	0	0	0	0	0	0	0	0	0	0	0	0	3	0	5	0	0	4	3	4	0	0	0	0	5	5	6	5	6	4
607	Haloacid dehalogenase-like hydrolase domain-containing protein 2 OS=Homo sapiens OX=9606 GN=HDHD2 PE=1 SV=1	Q9H0R4	HDHD2	29 kDa	0	0	0	0	0	0	0	0	0	0	0	0	5	3	3	0	0	3	8	3	6	4	0	0	6	5	7	6	7	2
608	ADP-sugar pyrophosphatase OS=Homo sapiens OX=9606 GN=NUDT5 PE=1 SV=1	Q9UKK9	NUDT5	24 kDa	0	0	0	0	0	0	0	0	0	5	7	2	4	4	4	0	0	0	3	2	3	0	2	0	3	2	2	3	6	6
609	Carboxypeptidase N subunit 2 OS=Homo sapiens OX=9606 GN=CPN2 PE=1 SV=3	P22792	CPN2	61 kDa	0	0	0	0	0	0	0	0	0	0	0	0	5	7	3	0	0	0	2	3	4	0	0	0	3	3	5	6	6	7
610	Fatty acid-binding protein 5 OS=Homo sapiens OX=9606 GN=FABP5 PE=1 SV=3	Q01469	FABP5	15 kDa	0	0	0	0	0	0	0	0	0	0	0	0	4	0	0	8	8	9	2	0	2	3	5	4	0	0	0	3	3	2
611	Coronin-1C OS=Homo sapiens OX=9606 GN=CORO1C PE=1 SV=1	Q9ULV4	CORO1C	53 kDa	0	0	0	0	0	0	0	0	0	0	0	0	0	0	0	6	6	9	0	0	0	8	8	8	0	0	0	0	0	0
612	Complement component C8 beta chain OS=Homo sapiens OX=9606 GN=C8B PE=1 SV=3	P07358	C8B	67 kDa	0	0	0	0	0	0	0	0	0	0	0	0	7	5	5	4	5	4	8	2	5	0	2	0	6	5	2	4	5	4
613	NEDD8-activating enzyme E1 regulatory subunit OS=Homo sapiens OX=9606 GN=NAE1 PE=1 SV=1	Q13564	NAE1	60 kDa	0	0	0	3	0	0	0	0	0	3	0	0	0	5	0	0	0	0	5	0	3	0	0	0	3	2	0	0	0	0
614	Dynein light chain 2, cytoplasmic OS=Homo sapiens OX=9606 GN=DYNLL2 PE=1 SV=1	Q96FJ2	DYNLL2	10 kDa	0	0	0	0	0	0	0	0	0	0	0	0	0	0	0	4	0	0	0	0	0	0	0	0	0	0	0	0	0	0
615	Phospholysine phosphohistidine inorganic pyrophosphate phosphatase OS=Homo sapiens OX=9606 GN=LHPP PE=1 SV=2	Q9H008	LHPP	29 kDa	0	0	0	0	0	0	0	5	0	0	0	0	0	2	3	0	0	0	2	0	0	0	7	0	4	4	5	6	5	5
616	Eukaryotic translation initiation factor 1A, Y-chromosomal OS=Homo sapiens OX=9606 GN=EIF1AY PE=1 SV=4	O14602	EIF1AY	16 kDa	3	0	0	3	2	2	0	0	0	0	0	0	2	5	3	6	4	0	6	4	5	6	4	4	2	0	3	0	0	0
617	Diphosphomevalonate decarboxylase OS=Homo sapiens OX=9606 GN=MVD PE=1 SV=1	P53602	MVD	43 kDa	0	3	3	2	2	0	0	3	0	3	2	2	3	3	3	3	4	4	3	3	2	0	3	2	4	6	4	3	2	5
618	Serum amyloid P-component OS=Homo sapiens OX=9606 GN=APCS PE=1 SV=2	P02743	APCS	25 kDa	3	3	2	0	0	2	0	0	0	0	0	0	3	2	4	3	2	3	4	6	5	2	0	3	5	8	5	2	3	5
619	Keratin, type I cytoskeletal 17 OS=Homo sapiens OX=9606 GN=KRT17 PE=1 SV=2	Q04695	KRT17	48 kDa	0	0	0	0	0	0	0	0	0	0	0	0	0	0	0	16	18	15	0	0	0	0	0	0	0	0	0	0	0	0
620	Deoxyribose-phosphate aldolase OS=Homo sapiens OX=9606 GN=DERA PE=1 SV=2	Q9Y315	DERA	35 kDa	0	0	0	0	0	0	0	0	0	0	2	0	3	5	5	0	0	4	0	0	0	0	0	0	8	7	6	5	4	5
621	NEDD8-activating enzyme E1 catalytic subunit OS=Homo sapiens OX=9606 GN=UBA3 PE=1 SV=2	Q8TBC4	UBA3	52 kDa	0	0	0	0	0	0	0	0	0	0	0	0	3	3	0	4	0	5	4	2	3	0	4	0	4	6	4	2	3	3
622	26S proteasome non-ATPase regulatory subunit 8 OS=Homo sapiens OX=9606 GN=PSMD8 PE=1 SV=2	P48556	PSMD8	40 kDa	0	2	2	0	4	3	0	3	0	0	0	0	3	2	4	0	3	0	3	0	0	2	0	0	3	4	4	2	3	2
623	Immunoglobulin lambda variable 3-25 OS=Homo sapiens OX=9606 GN=IGLV3-25 PE=1 SV=2	P01717	IGLV3-25	12 kDa	0	0	0	0	0	0	0	0	0	0	0	0	4	0	5	0	0	0	0	3	0	0	2	2	3	2	0	3	2	0
624	Dehydrogenase/reductase SDR family member 11 OS=Homo sapiens OX=9606 GN=DHRS11 PE=1 SV=1	Q6UWP2	DHRS11	28 kDa	0	0	0	0	0	0	0	2	0	2	0	0	6	0	0	7	0	0	0	0	0	0	0	0	0	5	0	2	4	0
625	Complement component C8 gamma chain OS=Homo sapiens OX=9606 GN=C8G PE=1 SV=3	P07360	C8G	22 kDa	0	2	0	0	0	0	0	0	0	0	0	0	3	6	8	2	0	2	3	4	5	0	0	2	5	3	3	4	3	3
626	Inter-alpha-trypsin inhibitor heavy chain H3 OS=Homo sapiens OX=9606 GN=ITIH3 PE=1 SV=2	Q06033	ITIH3	100 kDa	0	0	0	0	0	0	0	0	0	0	0	0	4	2	2	0	0	0	0	0	0	0	0	0	4	4	6	11	9	11
627	Galectin-3-binding protein OS=Homo sapiens OX=9606 GN=LGALS3BP PE=1 SV=1	Q08380	LGALS3BP	65 kDa	0	0	0	0	0	0	0	0	0	0	0	0	3	4	3	0	0	0	2	4	0	0	0	0	5	11	10	9	6	11
628	AP-2 complex subunit mu OS=Homo sapiens OX=9606 GN=AP2M1 PE=1 SV=2	Q96CW1	AP2M1	50 kDa	0	0	0	0	0	0	0	0	0	0	0	0	0	0	0	2	3	0	3	3	2	3	3	2	5	5	9	0	2	3
629	Signal transducing adapter molecule 1 OS=Homo sapiens OX=9606 GN=STAM PE=1 SV=3	Q92783	STAM	59 kDa	0	0	0	2	2	6	0	0	0	0	3	0	2	3	2	0	0	0	3	0	0	0	0	0	0	2	3	3	4	5
630	N-acetylmuramoyl-L-alanine amidase OS=Homo sapiens OX=9606 GN=PGLYRP2 PE=1 SV=1	Q96PD5	PGLYRP2	62 kDa	0	0	0	0	0	0	0	0	0	0	0	0	5	5	4	3	0	0	0	3	2	0	2	0	5	4	4	12	5	7
631	Immunoglobulin heavy variable 3-74 OS=Homo sapiens OX=9606 GN=IGHV3-74 PE=3 SV=1	A0A0B4J1X5	IGHV3-74	13 kDa	0	0	0	0	0	0	0	0	0	0	0	0	5	6	8	2	5	0	5	6	6	0	0	0	4	3	4	0	4	6
632	Eukaryotic initiation factor 4A-III OS=Homo sapiens OX=9606 GN=EIF4A3 PE=1 SV=4	P38919	EIF4A3	47 kDa	0	0	0	0	0	0	0	0	0	0	0	0	0	0	0	0	0	0	4	5	0	0	0	0	0	0	0	4	0	0
633	Immunoglobulin lambda variable 3-21 OS=Homo sapiens OX=9606 GN=IGLV3-21 PE=1 SV=2	P80748	IGLV3-21	12 kDa	0	0	0	0	0	0	0	0	0	0	0	0	3	4	3	0	3	3	5	4	3	4	4	5	0	0	0	0	0	0
634	Quinone oxidoreductase PIG3 OS=Homo sapiens OX=9606 GN=TP53I3 PE=1 SV=2	Q53FA7	TP53I3	36 kDa	2	0	0	0	3	2	0	0	2	5	3	2	3	2	0	2	0	0	2	0	4	4	0	0	0	0	0	2	3	2
635	Plasma kallikrein OS=Homo sapiens OX=9606 GN=KLKB1 PE=1 SV=1	P03952	KLKB1	71 kDa	0	0	0	0	0	0	0	0	0	0	0	0	0	3	0	0	0	0	4	3	3	0	0	0	3	3	0	3	3	3
636	Immunoglobulin kappa variable 1D-12 OS=Homo sapiens OX=9606 GN=IGKV1D-12 PE=1 SV=2	P01611	IGKV1D-12	13 kDa	0	0	0	0	0	0	0	0	0	0	0	0	6	5	6	4	0	0	5	0	4	0	0	0	0	0	0	4	5	0
637	PDZ and LIM domain protein 1 OS=Homo sapiens OX=9606 GN=PDLIM1 PE=1 SV=4	O00151	PDLIM1	36 kDa	0	0	0	0	0	0	0	2	2	0	0	0	0	2	0	6	7	10	0	0	0	8	6	6	0	0	0	0	0	0
638	Tubulin-specific chaperone cofactor E-like protein OS=Homo sapiens OX=9606 GN=TBCEL PE=1 SV=2	Q5QJ74	TBCEL	48 kDa	0	0	0	0	0	2	0	0	0	2	2	2	4	2	4	0	2	4	0	0	3	0	3	2	3	0	0	0	0	2
639	Sialic acid synthase OS=Homo sapiens OX=9606 GN=NANS PE=1 SV=2	Q9NR45	NANS	40 kDa	0	0	2	2	2	0	0	0	0	0	3	3	0	0	0	0	0	0	0	0	0	0	6	0	5	5	5	0	0	5
640	Bone marrow proteoglycan OS=Homo sapiens OX=9606 GN=PRG2 PE=1 SV=2	P13727	PRG2	25 kDa	0	0	0	5	3	4	0	2	3	0	0	0	0	0	0	4	0	0	0	0	0	0	0	0	6	4	5	4	5	8
641	Ras-related protein Rab-5B OS=Homo sapiens OX=9606 GN=RAB5B PE=1 SV=1	P61020	RAB5B	24 kDa	0	0	0	0	0	0	0	0	0	0	5	2	0	0	0	0	0	0	0	0	0	0	4	0	0	0	3	0	0	0
642	Immunoglobulin kappa variable 4-1 OS=Homo sapiens OX=9606 GN=IGKV4-1 PE=1 SV=1	P06312	IGKV4-1	13 kDa	0	0	0	0	0	0	0	0	0	0	0	0	0	5	0	0	0	0	0	0	0	0	0	0	5	0	5	0	0	3
643	Methylthioribose-1-phosphate isomerase OS=Homo sapiens OX=9606 GN=MRI1 PE=1 SV=1	Q9BV20	MRI1	39 kDa	0	0	0	0	0	0	0	0	0	0	0	0	2	2	3	0	2	0	0	0	0	0	4	2	0	0	0	2	0	2
644	Serine/threonine-protein phosphatase 6 catalytic subunit OS=Homo sapiens OX=9606 GN=PPP6C PE=1 SV=1	O00743	PPP6C	35 kDa	2	0	2	0	0	0	0	0	0	0	0	0	0	2	2	0	0	0	0	0	0	0	0	0	4	4	4	0	3	3
645	Heme-binding protein 2 OS=Homo sapiens OX=9606 GN=HEBP2 PE=1 SV=1	Q9Y5Z4	HEBP2	23 kDa	0	0	0	2	2	4	0	3	0	0	6	0	3	4	0	0	0	0	3	0	4	0	0	0	0	0	0	3	0	0
646	Heterogeneous nuclear ribonucleoproteins A2/B1 OS=Homo sapiens OX=9606 GN=HNRNPA2B1 PE=1 SV=2	P22626	HNRNPA2B1	37 kDa	0	0	0	0	0	0	0	0	0	0	0	0	0	0	0	0	3	0	0	0	0	6	5	2	0	0	0	0	0	0
647	CD5 antigen-like OS=Homo sapiens OX=9606 GN=CD5L PE=1 SV=1	O43866	CD5L	38 kDa	0	0	0	0	0	0	0	0	0	0	0	0	5	3	4	3	2	3	3	2	4	0	0	0	5	2	5	2	4	5
648	Golgi-associated plant pathogenesis-related protein 1 OS=Homo sapiens OX=9606 GN=GLIPR2 PE=1 SV=3	Q9H4G4	GLIPR2	17 kDa	2	0	0	3	2	2	0	0	0	3	3	2	0	3	0	0	0	0	2	0	0	0	0	0	3	5	4	0	0	0
649	Copine-3 OS=Homo sapiens OX=9606 GN=CPNE3 PE=1 SV=1	O75131	CPNE3	60 kDa	0	0	0	0	0	0	0	0	0	0	0	0	2	0	0	0	0	2	2	0	2	2	0	0	2	2	3	2	3	2
650	Pyridoxal phosphate homeostasis protein OS=Homo sapiens OX=9606 GN=PLPBP PE=1 SV=1	O94903	PLPBP	30 kDa	0	0	0	0	0	0	0	0	0	5	5	0	0	0	0	0	0	0	0	0	0	0	0	0	0	0	0	0	0	3
651	Immunoglobulin kappa variable 3-11 OS=Homo sapiens OX=9606 GN=IGKV3-11 PE=1 SV=1	P04433	IGKV3-11	13 kDa	0	0	0	0	0	0	0	0	0	0	0	0	3	3	2	3	2	3	4	3	2	0	2	2	0	0	3	3	0	5
652	SEC14-like protein 2 OS=Homo sapiens OX=9606 GN=SEC14L2 PE=1 SV=1	O76054	SEC14L2	46 kDa	0	0	0	0	0	0	0	0	0	3	4	0	0	0	0	0	0	0	0	4	0	0	0	3	0	0	0	0	0	0
653	Acylphosphatase-1 OS=Homo sapiens OX=9606 GN=ACYP1 PE=1 SV=2	P07311	ACYP1	11 kDa	0	2	0	2	0	3	0	0	0	0	0	0	3	2	3	0	2	3	0	3	2	0	0	2	0	2	3	2	0	0
654	Immunoglobulin kappa variable 3-15 OS=Homo sapiens OX=9606 GN=IGKV3-15 PE=1 SV=2	P01624	IGKV3-15	12 kDa	0	0	0	0	0	0	0	0	0	0	0	0	2	3	2	0	2	3	0	5	2	0	3	0	3	4	0	3	3	3
655	Ribonucleoside-diphosphate reductase large subunit OS=Homo sapiens OX=9606 GN=RRM1 PE=1 SV=1	P23921	RRM1	90 kDa	3	3	0	2	0	4	0	3	2	0	0	4	0	0	0	3	0	0	0	0	0	2	0	2	0	0	0	3	2	4
656	Serine/threonine-protein kinase PAK 2 OS=Homo sapiens OX=9606 GN=PAK2 PE=1 SV=3	Q13177	PAK2	58 kDa	0	0	0	0	0	0	0	3	0	0	0	0	3	2	2	0	0	0	0	0	0	5	4	7	0	3	0	0	0	3
657	Importin subunit alpha-3 OS=Homo sapiens OX=9606 GN=KPNA4 PE=1 SV=1	O00629	KPNA4	58 kDa	0	0	0	0	0	0	0	0	0	0	2	0	0	2	0	0	0	0	0	0	0	0	0	0	5	5	4	4	3	6
658	Transcriptional activator protein Pur-alpha OS=Homo sapiens OX=9606 GN=PURA PE=1 SV=2	Q00577	PURA	35 kDa	0	0	0	0	2	2	0	0	0	0	0	0	4	0	0	0	0	0	0	0	0	0	0	0	0	2	0	0	2	0
659	Apolipoprotein C-I OS=Homo sapiens OX=9606 GN=APOC1 PE=1 SV=1	P02654	APOC1	9 kDa	0	0	0	0	0	0	0	0	0	0	0	0	4	2	4	3	2	0	4	0	3	0	0	0	3	6	4	7	3	5
660	5'-deoxynucleotidase HDDC2 OS=Homo sapiens OX=9606 GN=HDDC2 PE=1 SV=1	Q7Z4H3	HDDC2	23 kDa	0	0	0	0	0	0	0	0	0	3	2	4	3	2	3	0	0	0	2	0	3	0	2	0	4	5	2	3	0	3
661	UV excision repair protein RAD23 homolog A OS=Homo sapiens OX=9606 GN=RAD23A PE=1 SV=1	P54725	RAD23A	40 kDa	0	0	3	0	0	0	0	0	0	0	0	3	0	0	0	0	0	0	0	0	0	2	0	0	3	2	4	0	0	0
662	General vesicular transport factor p115 OS=Homo sapiens OX=9606 GN=USO1 PE=1 SV=2	O60763	USO1	108 kDa	0	0	0	2	0	0	0	5	0	0	0	0	5	0	0	0	0	0	0	0	0	2	2	0	0	2	2	3	4	3
663	Methylosome protein 50 OS=Homo sapiens OX=9606 GN=WDR77 PE=1 SV=1	Q9BQA1	WDR77	37 kDa	0	0	0	0	0	0	0	0	0	0	0	0	2	0	0	0	0	0	0	0	0	0	0	0	6	0	0	0	0	2
664	Pigment epithelium-derived factor OS=Homo sapiens OX=9606 GN=SERPINF1 PE=1 SV=4	P36955	SERPINF1	46 kDa	2	3	3	0	3	3	0	2	0	0	0	0	2	0	0	2	0	0	2	0	0	0	0	0	4	5	5	4	3	4
665	Azurocidin OS=Homo sapiens OX=9606 GN=AZU1 PE=1 SV=3	P20160	AZU1	27 kDa	0	0	0	0	0	0	0	0	0	0	0	0	0	0	0	0	0	0	0	0	0	0	0	5	0	0	0	0	0	0
666	SEC14-like protein 4 OS=Homo sapiens OX=9606 GN=SEC14L4 PE=1 SV=1	Q9UDX3	SEC14L4	47 kDa	0	0	0	0	0	0	0	0	0	3	0	2	3	2	3	0	0	4	0	0	0	2	2	0	4	0	0	0	4	4
667	Actin-related protein 2/3 complex subunit 2 OS=Homo sapiens OX=9606 GN=ARPC2 PE=1 SV=1	O15144	ARPC2	34 kDa	0	0	0	0	0	0	0	2	3	0	0	0	0	0	2	6	6	2	0	0	0	6	4	5	0	2	0	0	0	0
668	Ubiquitin thioesterase OTUB1 OS=Homo sapiens OX=9606 GN=OTUB1 PE=1 SV=2	Q96FW1	OTUB1	31 kDa	0	0	0	0	0	0	0	0	0	0	0	0	0	3	2	0	0	0	2	0	0	0	0	0	7	7	4	3	3	4
669	3'(2'),5'-bisphosphate nucleotidase 1 OS=Homo sapiens OX=9606 GN=BPNT1 PE=1 SV=1	O95861	BPNT1	33 kDa	0	0	0	2	0	0	0	0	0	0	0	0	3	4	5	0	0	0	3	2	0	0	0	0	2	0	0	3	0	0
670	Complement factor I OS=Homo sapiens OX=9606 GN=CFI PE=1 SV=2	P05156	CFI	66 kDa	0	0	0	0	0	0	0	0	0	0	0	0	5	3	5	0	0	0	0	6	2	0	2	0	6	4	4	3	5	5
671	Endoplasmin OS=Homo sapiens OX=9606 GN=HSP90B1 PE=1 SV=1	P14625	HSP90B1	92 kDa	0	0	0	0	0	0	0	0	3	0	0	0	0	0	0	0	0	5	0	0	0	0	8	0	0	0	0	0	0	0
672	Serine/threonine-protein kinase WNK1 OS=Homo sapiens OX=9606 GN=WNK1 PE=1 SV=2	Q9H4A3	WNK1	251 kDa	0	0	0	0	0	0	0	0	0	4	6	0	5	0	0	0	0	0	0	0	0	0	0	0	3	3	4	0	0	3
673	Protein S100-A6 OS=Homo sapiens OX=9606 GN=S100A6 PE=1 SV=1	P06703	S100A6	10 kDa	0	0	2	2	2	0	0	0	2	2	5	0	2	0	0	0	0	2	0	2	2	0	3	0	2	0	0	3	3	0
674	Immunoglobulin J chain OS=Homo sapiens OX=9606 GN=JCHAIN PE=1 SV=4	P01591	JCHAIN	18 kDa	0	0	0	0	0	0	0	0	0	0	0	0	0	3	0	0	0	0	0	0	0	0	0	0	3	0	0	3	3	2
675	Crk-like protein OS=Homo sapiens OX=9606 GN=CRKL PE=1 SV=1	P46109	CRKL	34 kDa	0	0	0	2	0	0	0	0	0	0	0	0	0	0	3	0	0	0	4	0	0	2	0	0	2	2	2	3	3	4
676	Endophilin-B2 OS=Homo sapiens OX=9606 GN=SH3GLB2 PE=1 SV=1	Q9NR46	SH3GLB2	44 kDa	0	0	0	0	0	0	0	0	0	0	0	0	0	0	0	0	0	2	0	0	0	0	0	0	0	0	0	0	0	0
677	Programmed cell death protein 6 OS=Homo sapiens OX=9606 GN=PDCD6 PE=1 SV=1	O75340	PDCD6	22 kDa	0	2	0	0	3	0	0	4	0	0	0	2	0	0	0	2	2	2	0	0	0	0	0	2	0	0	0	0	0	0
678	Farnesyl pyrophosphate synthase OS=Homo sapiens OX=9606 GN=FDPS PE=1 SV=4	P14324	FDPS	48 kDa	0	0	0	0	0	3	0	0	0	3	6	3	0	0	0	0	0	0	0	0	0	0	0	0	4	2	3	0	3	3
679	Ubiquitin-fold modifier-conjugating enzyme 1 OS=Homo sapiens OX=9606 GN=UFC1 PE=1 SV=3	Q9Y3C8	UFC1	19 kDa	0	0	0	0	0	0	0	0	0	0	2	0	0	0	0	0	2	2	3	0	0	0	0	0	0	3	0	0	0	0
680	SH3 domain-binding glutamic acid-rich-like protein 2 OS=Homo sapiens OX=9606 GN=SH3BGRL2 PE=1 SV=2	Q9UJC5	SH3BGRL2	12 kDa	0	0	0	0	0	0	0	0	0	0	0	0	0	0	0	0	0	0	0	0	0	0	0	0	0	0	3	0	0	0
681	Serine/threonine-protein phosphatase 6 regulatory subunit 3 OS=Homo sapiens OX=9606 GN=PPP6R3 PE=1 SV=2	Q5H9R7	PPP6R3	98 kDa	0	0	0	0	0	3	0	0	0	0	7	0	0	0	0	0	0	0	0	0	0	0	0	0	4	6	2	7	7	4
682	Tetranectin OS=Homo sapiens OX=9606 GN=CLEC3B PE=1 SV=3	P05452	CLEC3B	23 kDa	0	0	0	0	0	0	0	0	0	0	0	0	0	0	0	0	3	0	0	0	4	0	0	0	0	0	0	5	5	3
683	Argininosuccinate lyase OS=Homo sapiens OX=9606 GN=ASL PE=1 SV=4	P04424	ASL	52 kDa	0	0	0	0	0	0	0	0	0	0	0	2	0	0	5	0	0	0	0	0	0	0	0	3	2	2	6	0	0	0
684	Alanine--tRNA ligase, cytoplasmic OS=Homo sapiens OX=9606 GN=AARS1 PE=1 SV=2	P49588	AARS1	107 kDa	0	0	0	0	0	0	0	0	0	0	0	0	0	0	0	0	0	0	0	0	0	0	0	0	6	7	4	5	2	5
685	Apolipoprotein(a) OS=Homo sapiens OX=9606 GN=LPA PE=1 SV=1	P08519	LPA	501 kDa	0	0	0	0	0	0	0	0	0	0	0	0	7	5	5	0	0	0	0	0	0	0	0	0	0	0	0	0	0	0
686	Glycerol-3-phosphate phosphatase OS=Homo sapiens OX=9606 GN=PGP PE=1 SV=1	A6NDG6	PGP	34 kDa	0	0	0	0	3	2	0	0	0	0	3	2	0	0	0	2	3	0	0	0	0	0	2	2	3	0	4	0	0	0
687	Immunoglobulin-binding protein 1 OS=Homo sapiens OX=9606 GN=IGBP1 PE=1 SV=1	P78318	IGBP1	39 kDa	0	0	0	0	0	0	0	0	0	0	0	0	0	0	0	0	0	0	0	0	0	2	0	0	0	0	0	0	0	0
688	Dual specificity mitogen-activated protein kinase kinase 2 OS=Homo sapiens OX=9606 GN=MAP2K2 PE=1 SV=1	P36507	MAP2K2	44 kDa	0	0	0	0	0	0	0	0	0	0	7	0	2	0	0	0	0	0	0	0	0	0	0	0	3	4	3	3	4	4
689	Adiponectin OS=Homo sapiens OX=9606 GN=ADIPOQ PE=1 SV=1	Q15848	ADIPOQ	26 kDa	0	0	0	0	0	0	0	0	0	0	0	0	0	0	0	0	0	0	0	0	0	0	0	0	4	5	4	7	6	8
690	Calponin-2 OS=Homo sapiens OX=9606 GN=CNN2 PE=1 SV=4	Q99439	CNN2	34 kDa	0	0	0	0	0	0	0	0	2	0	0	0	0	0	0	7	7	6	0	0	0	7	4	3	2	3	0	0	0	0
691	Tubulin--tyrosine ligase-like protein 12 OS=Homo sapiens OX=9606 GN=TTLL12 PE=1 SV=2	Q14166	TTLL12	74 kDa	0	0	0	0	0	2	0	0	0	0	0	0	0	0	0	0	0	0	4	0	2	4	4	0	3	0	0	3	2	4
692	Nicotinamide phosphoribosyltransferase OS=Homo sapiens OX=9606 GN=NAMPT PE=1 SV=1	P43490	NAMPT	56 kDa	0	0	0	0	0	0	0	0	0	0	0	0	0	0	0	2	0	0	0	0	0	0	2	6	0	0	0	0	0	0
693	Kallistatin OS=Homo sapiens OX=9606 GN=SERPINA4 PE=1 SV=3	P29622	SERPINA4	49 kDa	0	0	0	0	0	0	0	0	0	0	0	0	0	0	0	0	0	0	3	0	0	0	0	0	5	6	3	6	4	10
694	COP9 signalosome complex subunit 7a OS=Homo sapiens OX=9606 GN=COPS7A PE=1 SV=1	Q9UBW8	COPS7A	30 kDa	0	0	0	0	0	0	0	0	0	2	3	2	0	0	0	0	0	0	2	0	0	0	2	2	0	3	2	0	0	3
695	Serine/threonine-protein phosphatase PP1-beta catalytic subunit OS=Homo sapiens OX=9606 GN=PPP1CB PE=1 SV=3	P62140	PPP1CB	37 kDa	0	0	0	0	0	0	0	0	0	0	0	0	0	0	0	0	3	0	0	0	0	0	0	0	0	0	0	0	0	0
696	Lumican OS=Homo sapiens OX=9606 GN=LUM PE=1 SV=2	P51884	LUM	38 kDa	0	0	0	0	0	0	0	0	0	0	0	0	3	0	0	0	0	0	0	0	0	0	0	0	5	6	7	3	3	9
697	PEST proteolytic signal-containing nuclear protein OS=Homo sapiens OX=9606 GN=PCNP PE=1 SV=2	Q8WW12	PCNP	19 kDa	0	0	0	0	0	0	0	0	0	0	0	0	2	0	0	0	0	0	0	0	0	0	0	0	0	0	0	0	0	0
698	V-type proton ATPase subunit D OS=Homo sapiens OX=9606 GN=ATP6V1D PE=1 SV=1	Q9Y5K8	ATP6V1D	28 kDa	0	0	0	0	0	0	0	0	0	2	0	0	0	0	0	0	0	0	0	0	0	0	0	0	3	4	4	4	4	0
699	Serine/threonine-protein phosphatase 5 OS=Homo sapiens OX=9606 GN=PPP5C PE=1 SV=1	P53041	PPP5C	57 kDa	0	0	0	2	2	0	0	0	0	0	2	0	0	0	0	3	0	0	2	2	0	2	6	5	0	0	0	0	2	0
700	Complement component C6 OS=Homo sapiens OX=9606 GN=C6 PE=1 SV=3	P13671	C6	105 kDa	0	0	0	0	0	0	0	0	0	0	0	0	4	2	0	0	0	0	0	0	0	0	0	0	0	0	0	2	0	2
701	Complement component C8 alpha chain OS=Homo sapiens OX=9606 GN=C8A PE=1 SV=2	P07357	C8A	65 kDa	0	0	0	0	0	0	0	0	0	0	0	0	5	3	3	0	0	0	0	5	4	0	0	0	0	0	0	6	0	4
702	HLA class I histocompatibility antigen, C alpha chain OS=Homo sapiens OX=9606 GN=HLA-C PE=1 SV=3	P10321	HLA-C	41 kDa	0	0	0	0	0	0	0	0	0	0	0	0	0	0	0	3	5	4	0	0	0	0	6	4	0	0	0	0	0	0
703	Immunoglobulin heavy variable 4-39 OS=Homo sapiens OX=9606 GN=IGHV4-39 PE=1 SV=2	P01824	IGHV4-39	14 kDa	0	0	0	0	0	0	0	0	0	0	0	0	0	0	0	2	3	4	0	0	0	3	2	0	0	0	0	4	0	3
704	Immunoglobulin heavy variable 3-9 OS=Homo sapiens OX=9606 GN=IGHV3-9 PE=1 SV=2	P01782	IGHV3-9	13 kDa	0	0	0	0	0	0	0	0	0	0	0	0	0	0	0	0	0	0	0	0	3	2	3	4	5	6	3	6	5	7
705	V-type proton ATPase subunit G 1 OS=Homo sapiens OX=9606 GN=ATP6V1G1 PE=1 SV=3	O75348	ATP6V1G1	14 kDa	0	0	0	0	0	0	0	0	0	0	2	0	3	0	0	0	0	0	0	0	0	0	4	3	0	0	0	0	0	3
706	Protein FAM114A2 OS=Homo sapiens OX=9606 GN=FAM114A2 PE=1 SV=4	Q9NRY5	FAM114A2	55 kDa	0	0	0	2	4	0	0	0	0	0	2	3	0	3	2	0	0	0	0	0	0	0	0	0	0	0	3	0	3	0
707	NudC domain-containing protein 2 OS=Homo sapiens OX=9606 GN=NUDCD2 PE=1 SV=1	Q8WVJ2	NUDCD2	18 kDa	0	0	0	0	0	0	0	0	0	2	3	0	0	0	0	0	0	0	0	0	0	0	0	0	0	0	0	0	0	3
708	Immunoglobulin lambda variable 1-47 OS=Homo sapiens OX=9606 GN=IGLV1-47 PE=1 SV=2	P01700	IGLV1-47	12 kDa	0	0	0	0	0	0	0	0	0	0	0	0	0	6	5	0	3	0	0	0	0	0	0	0	3	2	3	2	2	2
709	SH3 domain-binding glutamic acid-rich-like protein OS=Homo sapiens OX=9606 GN=SH3BGRL PE=1 SV=1	O75368	SH3BGRL	13 kDa	0	0	0	0	0	0	0	0	0	0	2	2	2	0	0	0	0	0	0	0	0	0	0	2	0	0	4	0	0	2
710	Superoxide dismutase [Mn], mitochondrial OS=Homo sapiens OX=9606 GN=SOD2 PE=1 SV=3	P04179	SOD2	25 kDa	0	0	0	0	0	0	0	0	0	0	0	0	0	0	0	0	3	0	0	0	0	0	0	0	0	0	0	0	0	0
711	Small glutamine-rich tetratricopeptide repeat-containing protein alpha OS=Homo sapiens OX=9606 GN=SGTA PE=1 SV=1	O43765	SGTA	34 kDa	0	0	0	0	0	0	0	0	0	0	0	0	0	3	2	5	3	2	0	0	0	2	2	0	0	0	0	0	0	2
712	Signal transducer and activator of transcription 5A OS=Homo sapiens OX=9606 GN=STAT5A PE=1 SV=1	P42229	STAT5A	91 kDa	0	0	0	0	0	0	0	0	0	0	0	2	0	0	0	0	0	0	0	0	0	0	0	0	0	0	0	0	0	4
713	Serum amyloid A-4 protein OS=Homo sapiens OX=9606 GN=SAA4 PE=1 SV=2	P35542	SAA4	15 kDa	0	0	0	0	0	0	0	0	0	0	0	0	0	0	0	0	0	0	0	0	0	0	0	0	2	3	4	0	2	0
714	CTP synthase 1 OS=Homo sapiens OX=9606 GN=CTPS1 PE=1 SV=2	P17812	CTPS1	67 kDa	0	0	0	0	2	0	0	3	2	3	2	3	0	0	0	0	0	0	0	0	0	0	0	0	0	0	2	0	0	3
715	COP9 signalosome complex subunit 7b OS=Homo sapiens OX=9606 GN=COPS7B PE=1 SV=1	Q9H9Q2	COPS7B	30 kDa	0	0	0	2	0	3	0	0	0	2	3	3	0	0	0	0	0	0	0	0	0	0	0	0	0	0	0	0	0	0
716	Ran GTPase-activating protein 1 OS=Homo sapiens OX=9606 GN=RANGAP1 PE=1 SV=1	P46060	RANGAP1	64 kDa	0	0	0	2	0	3	0	0	2	4	2	3	3	0	0	0	0	0	0	2	2	0	0	0	2	2	4	4	0	3
717	HLA class I histocompatibility antigen, A alpha chain OS=Homo sapiens OX=9606 GN=HLA-A PE=1 SV=2	P04439	HLA-A	41 kDa	0	0	0	0	0	0	0	0	0	0	0	0	0	0	0	5	0	0	0	0	0	0	0	6	0	0	0	0	0	0
718	DnaJ homolog subfamily B member 2 OS=Homo sapiens OX=9606 GN=DNAJB2 PE=1 SV=3	P25686	DNAJB2	36 kDa	0	0	0	0	0	0	0	0	0	2	3	0	4	0	0	0	0	0	0	0	0	0	0	0	0	0	0	0	0	0
719	Tensin-1 OS=Homo sapiens OX=9606 GN=TNS1 PE=1 SV=2	Q9HBL0	TNS1	186 kDa	0	0	0	0	0	0	0	0	0	0	0	0	0	0	0	0	0	0	0	0	0	0	0	0	0	0	0	0	2	0
720	Syntaxin-7 OS=Homo sapiens OX=9606 GN=STX7 PE=1 SV=4	O15400	STX7	30 kDa	0	0	0	0	0	0	0	0	0	0	0	0	0	0	0	0	3	2	2	0	0	3	0	0	0	0	0	0	0	0
721	COP9 signalosome complex subunit 8 OS=Homo sapiens OX=9606 GN=COPS8 PE=1 SV=1	Q99627	COPS8	23 kDa	3	0	0	0	0	0	0	0	0	0	0	0	0	0	0	0	0	0	0	0	0	0	0	0	2	2	2	0	0	0
722	Ras-related protein Rab-10 OS=Homo sapiens OX=9606 GN=RAB10 PE=1 SV=1	P61026	RAB10	23 kDa	0	0	0	0	0	0	0	3	0	0	0	0	0	0	0	0	0	0	0	0	0	0	0	0	0	0	0	0	0	0
723	Cysteine and histidine-rich domain-containing protein 1 OS=Homo sapiens OX=9606 GN=CHORDC1 PE=1 SV=2	Q9UHD1	CHORDC1	37 kDa	0	0	0	0	0	0	0	0	0	0	0	0	0	0	0	0	0	2	0	0	0	0	0	0	2	0	0	0	0	3
724	Immunoglobulin heavy variable 5-10-1 OS=Homo sapiens OX=9606 GN=IGHV5-10-1 PE=3 SV=1	A0A0J9YXX1	IGHV5-10-1	13 kDa	0	0	0	0	0	0	0	0	0	0	0	0	4	7	3	3	5	5	2	0	0	0	0	0	0	0	2	0	0	3
725	GTPase KRas OS=Homo sapiens OX=9606 GN=KRAS PE=1 SV=1	P01116	KRAS	22 kDa	0	0	0	3	0	0	0	0	0	5	0	4	0	0	0	0	0	0	0	0	0	0	0	0	0	3	5	0	0	2
726	Immunoglobulin heavy variable 3-30-3 OS=Homo sapiens OX=9606 GN=IGHV3-30-3 PE=1 SV=1	P0DP02	IGHV3-30-3	13 kDa	0	0	0	0	0	0	0	0	0	0	0	0	5	3	6	4	3	3	0	0	0	2	2	2	0	2	2	2	2	2
727	Phosphatidylinositol-binding clathrin assembly protein OS=Homo sapiens OX=9606 GN=PICALM PE=1 SV=2	Q13492	PICALM	71 kDa	0	0	0	0	0	0	0	0	0	0	0	0	0	0	0	0	0	0	0	0	0	0	0	5	0	3	0	0	0	5
728	Mitogen-activated protein kinase 1 OS=Homo sapiens OX=9606 GN=MAPK1 PE=1 SV=3	P28482	MAPK1	41 kDa	0	0	0	0	0	0	0	0	0	0	0	0	0	2	2	0	0	0	0	0	0	0	0	0	2	0	4	3	2	3
729	Casein kinase II subunit alpha OS=Homo sapiens OX=9606 GN=CSNK2A1 PE=1 SV=1	P68400	CSNK2A1	45 kDa	0	0	0	0	0	0	0	0	0	0	0	0	0	0	0	0	0	3	0	0	0	0	3	3	4	4	4	0	0	0
730	Voltage-dependent anion-selective channel protein 3 OS=Homo sapiens OX=9606 GN=VDAC3 PE=1 SV=1	Q9Y277	VDAC3	31 kDa	0	0	0	0	0	0	0	0	0	0	0	0	0	0	0	4	3	3	0	0	0	2	0	2	4	3	4	0	3	0
731	V-type proton ATPase subunit E 1 OS=Homo sapiens OX=9606 GN=ATP6V1E1 PE=1 SV=1	P36543	ATP6V1E1	26 kDa	0	0	0	0	0	0	0	0	0	0	0	0	0	0	0	0	0	2	0	0	0	3	0	6	0	0	7	2	4	4
732	Serine/threonine-protein phosphatase CPPED1 OS=Homo sapiens OX=9606 GN=CPPED1 PE=1 SV=3	Q9BRF8	CPPED1	36 kDa	0	0	0	0	0	0	0	0	0	0	0	0	0	0	0	0	0	0	2	0	0	0	0	0	3	4	3	0	0	0
733	Ras-related protein Rab-14 OS=Homo sapiens OX=9606 GN=RAB14 PE=1 SV=4	P61106	RAB14	24 kDa	0	0	0	0	0	0	0	0	0	0	0	0	0	0	0	0	0	2	0	0	0	3	2	0	0	0	0	0	0	0
734	Ras-related protein Rab-11B OS=Homo sapiens OX=9606 GN=RAB11B PE=1 SV=4	Q15907	RAB11B	24 kDa	0	0	0	0	0	0	0	0	0	0	0	0	0	0	0	0	0	0	0	0	0	0	0	0	3	6	4	0	0	0
735	Ras-related protein Rab-27B OS=Homo sapiens OX=9606 GN=RAB27B PE=1 SV=4	O00194	RAB27B	25 kDa	0	0	0	0	0	0	0	0	0	0	0	0	0	4	4	0	3	0	0	0	0	0	0	3	0	0	0	0	0	0
736	Urea transporter 1 OS=Homo sapiens OX=9606 GN=SLC14A1 PE=1 SV=2	Q13336	SLC14A1	43 kDa	0	0	0	0	0	0	0	0	0	0	3	2	0	0	0	0	0	0	0	0	0	0	4	0	0	0	0	0	0	0
737	Hepatoma-derived growth factor OS=Homo sapiens OX=9606 GN=HDGF PE=1 SV=1	P51858	HDGF	27 kDa	0	0	0	0	0	0	0	2	0	0	0	0	0	0	0	3	0	0	0	0	0	0	0	0	0	0	0	0	0	0
738	40S ribosomal protein S17 OS=Homo sapiens OX=9606 GN=RPS17 PE=1 SV=2	P08708	RPS17	16 kDa	0	0	0	0	0	0	0	0	0	0	0	0	0	0	0	0	0	0	0	0	0	0	0	0	3	0	3	0	0	0
739	Immunoglobulin heavy variable 1-18 OS=Homo sapiens OX=9606 GN=IGHV1-18 PE=3 SV=1	A0A0C4DH31	IGHV1-18	13 kDa	0	0	0	0	0	0	0	0	0	0	0	0	0	0	2	0	0	0	0	0	0	0	0	0	0	0	0	0	0	0
740	Annexin A5 OS=Homo sapiens OX=9606 GN=ANXA5 PE=1 SV=2	P08758	ANXA5	36 kDa	0	0	0	0	0	0	0	3	3	3	2	0	0	0	0	0	0	0	0	0	0	0	3	3	2	2	0	0	2	0
741	Adenosine deaminase OS=Homo sapiens OX=9606 GN=ADA PE=1 SV=3	P00813	ADA	41 kDa	0	0	0	2	0	0	0	0	0	0	0	0	4	2	0	0	3	0	0	0	0	0	0	0	0	0	0	0	0	0
742	Ubiquitin-conjugating enzyme E2 D3 OS=Homo sapiens OX=9606 GN=UBE2D3 PE=1 SV=1	P61077	UBE2D3	17 kDa	0	0	0	0	0	0	0	0	0	0	0	0	0	0	0	0	0	0	0	0	0	0	0	0	0	0	2	0	0	0
743	Acidic leucine-rich nuclear phosphoprotein 32 family member A OS=Homo sapiens OX=9606 GN=ANP32A PE=1 SV=1	P39687	ANP32A	29 kDa	0	0	0	0	0	0	0	0	0	0	0	0	0	0	0	0	0	0	0	0	0	0	0	0	0	0	2	0	3	4
744	Aminopeptidase B OS=Homo sapiens OX=9606 GN=RNPEP PE=1 SV=2	Q9H4A4	RNPEP	73 kDa	0	0	0	0	3	0	0	0	0	0	0	0	0	0	0	0	0	0	0	0	0	0	0	0	0	2	3	0	0	0
745	Arf-GAP with SH3 domain, ANK repeat and PH domain-containing protein 1 OS=Homo sapiens OX=9606 GN=ASAP1 PE=1 SV=4	Q9ULH1	ASAP1	126 kDa	0	0	0	0	0	0	0	0	0	0	2	3	0	0	0	0	0	0	0	2	0	0	0	0	0	0	0	0	2	0
746	Protein CDV3 homolog OS=Homo sapiens OX=9606 GN=CDV3 PE=1 SV=1	Q9UKY7	CDV3	27 kDa	0	0	0	0	0	0	0	0	0	0	0	0	0	0	0	0	0	0	0	0	0	0	0	0	0	0	0	3	0	0
747	Immunoglobulin lambda variable 1-40 OS=Homo sapiens OX=9606 GN=IGLV1-40 PE=1 SV=2	P01703	IGLV1-40	12 kDa	0	0	0	0	0	0	0	0	0	0	0	0	0	0	0	0	0	0	0	0	0	0	0	0	3	0	0	0	0	0
748	Ubiquitin-like modifier-activating enzyme 5 OS=Homo sapiens OX=9606 GN=UBA5 PE=1 SV=1	Q9GZZ9	UBA5	45 kDa	0	0	0	0	0	0	0	0	0	3	0	0	4	0	0	0	0	0	0	0	0	0	0	0	0	4	3	0	0	0
749	cAMP-dependent protein kinase catalytic subunit alpha OS=Homo sapiens OX=9606 GN=PRKACA PE=1 SV=2	P17612	PRKACA	41 kDa	0	0	0	0	0	0	0	0	0	2	0	4	3	0	4	4	4	0	0	0	0	0	0	0	0	0	0	0	0	0
750	Rootletin OS=Homo sapiens OX=9606 GN=CROCC PE=1 SV=1	Q5TZA2	CROCC	229 kDa	0	0	0	0	0	0	0	0	0	0	0	0	0	0	0	2	0	0	0	0	0	0	0	0	0	0	0	0	0	0
751	NAD(P)H-hydrate epimerase OS=Homo sapiens OX=9606 GN=NAXE PE=1 SV=2	Q8NCW5	NAXE	32 kDa	0	0	0	0	0	0	0	0	0	0	0	0	0	2	2	0	0	0	2	0	2	0	0	0	0	3	3	2	2	0
752	Transportin-1 OS=Homo sapiens OX=9606 GN=TNPO1 PE=1 SV=2	Q92973	TNPO1	102 kDa	0	0	0	0	0	0	0	0	0	0	2	0	0	0	0	0	0	0	0	0	0	0	0	0	2	3	0	2	3	3
753	Cullin-5 OS=Homo sapiens OX=9606 GN=CUL5 PE=1 SV=4	Q93034	CUL5	91 kDa	0	0	0	0	0	0	0	0	0	0	0	0	0	0	3	0	0	0	0	0	0	0	0	0	0	0	0	0	0	4
754	Myosin regulatory light polypeptide 9 OS=Homo sapiens OX=9606 GN=MYL9 PE=1 SV=4	P24844	MYL9	20 kDa	0	0	0	0	0	0	0	0	0	0	0	0	4	2	0	0	0	0	0	0	0	2	0	0	0	0	0	0	0	0
755	Lamin-B1 OS=Homo sapiens OX=9606 GN=LMNB1 PE=1 SV=2	P20700	LMNB1	66 kDa	0	0	0	0	0	0	0	0	0	0	0	0	0	0	0	3	0	5	0	0	0	3	0	2	0	0	0	0	0	0
756	AMP deaminase 3 OS=Homo sapiens OX=9606 GN=AMPD3 PE=1 SV=1	Q01432	AMPD3	89 kDa	0	0	0	0	0	0	0	2	0	0	3	0	0	0	0	0	0	0	0	0	0	0	0	0	4	0	4	0	2	3
757	Epidermal growth factor receptor substrate 15-like 1 OS=Homo sapiens OX=9606 GN=EPS15L1 PE=1 SV=1	Q9UBC2	EPS15L1	94 kDa	0	0	0	0	0	0	0	0	0	0	0	0	0	0	0	0	2	0	0	2	0	0	2	0	2	0	2	0	2	2
758	Immunoglobulin lambda variable 1-51 OS=Homo sapiens OX=9606 GN=IGLV1-51 PE=1 SV=2	P01701	IGLV1-51	12 kDa	0	0	0	0	0	0	0	0	0	0	0	0	0	3	2	0	0	3	0	0	3	0	2	0	0	0	0	0	0	0
759	Deaminated glutathione amidase OS=Homo sapiens OX=9606 GN=NIT1 PE=1 SV=2	Q86X76	NIT1	36 kDa	0	0	0	0	0	0	0	0	0	0	0	0	0	0	2	0	0	0	0	0	0	0	0	2	2	0	0	2	0	0
760	Protein LZIC OS=Homo sapiens OX=9606 GN=LZIC PE=1 SV=1	Q8WZA0	LZIC	21 kDa	0	0	0	0	0	0	0	0	0	0	0	0	0	0	0	0	0	0	0	0	0	0	0	0	2	0	0	0	0	0
761	Rho-associated protein kinase 2 OS=Homo sapiens OX=9606 GN=ROCK2 PE=1 SV=4	O75116	ROCK2	161 kDa	0	0	0	0	0	0	0	0	2	0	0	0	0	0	0	0	0	0	0	0	0	0	0	0	0	0	0	0	0	0
762	Oligoribonuclease, mitochondrial OS=Homo sapiens OX=9606 GN=REXO2 PE=1 SV=3	Q9Y3B8	REXO2	27 kDa	0	0	2	0	0	0	0	0	0	0	2	0	0	0	2	0	0	0	0	0	0	2	0	0	0	0	0	0	0	0
763	Methionine aminopeptidase 2 OS=Homo sapiens OX=9606 GN=METAP2 PE=1 SV=1	P50579	METAP2	53 kDa	0	0	2	0	0	2	0	0	0	0	0	0	0	0	0	0	0	0	0	0	0	2	0	0	0	0	0	0	0	0
764	Syntaxin-11 OS=Homo sapiens OX=9606 GN=STX11 PE=1 SV=1	O75558	STX11	33 kDa	0	0	0	0	0	2	0	0	0	0	0	0	0	0	0	0	0	0	0	0	0	0	0	2	0	0	0	0	0	0
765	Immunoglobulin heavy variable 3-15 OS=Homo sapiens OX=9606 GN=IGHV3-15 PE=3 SV=1	A0A0B4J1V0	IGHV3-15	13 kDa	0	0	0	0	0	0	0	0	0	0	0	0	0	0	2	0	0	0	0	0	0	0	4	0	3	3	2	0	0	3
766	RNA 3'-terminal phosphate cyclase OS=Homo sapiens OX=9606 GN=RTCA PE=1 SV=1	O00442	RTCA	39 kDa	0	0	0	0	0	0	0	0	0	0	0	3	0	0	0	0	0	0	0	2	2	0	0	0	2	2	3	0	0	0
767	Phospholipid scramblase 1 OS=Homo sapiens OX=9606 GN=PLSCR1 PE=1 SV=1	O15162	PLSCR1	35 kDa	0	0	0	0	0	0	0	0	0	0	0	0	0	0	0	0	0	0	0	0	0	0	0	0	2	0	4	0	0	0
768	S-adenosylmethionine synthase isoform type-2 OS=Homo sapiens OX=9606 GN=MAT2A PE=1 SV=1	P31153	MAT2A	44 kDa	0	0	0	0	0	0	0	0	0	0	0	0	0	0	0	0	0	0	0	0	0	0	0	0	2	2	0	0	0	0
769	Eukaryotic translation initiation factor 2 subunit 1 OS=Homo sapiens OX=9606 GN=EIF2S1 PE=1 SV=3	P05198	EIF2S1	36 kDa	0	0	0	0	0	0	0	0	0	0	0	0	0	0	0	0	0	0	0	0	2	0	0	0	0	3	2	3	3	2
770	Annexin A3 OS=Homo sapiens OX=9606 GN=ANXA3 PE=1 SV=3	P12429	ANXA3	36 kDa	0	0	0	0	0	0	0	0	2	0	0	0	0	0	0	3	0	3	0	0	0	4	4	3	0	0	0	0	0	0
771	Src substrate cortactin OS=Homo sapiens OX=9606 GN=CTTN PE=1 SV=2	Q14247	CTTN	62 kDa	0	0	0	2	0	2	0	0	0	0	0	0	0	0	0	0	0	0	0	0	0	2	0	0	0	0	0	0	0	0
772	Hsp70-binding protein 1 OS=Homo sapiens OX=9606 GN=HSPBP1 PE=1 SV=2	Q9NZL4	HSPBP1	39 kDa	0	0	0	0	0	0	0	0	0	0	0	0	0	2	0	2	0	0	4	0	0	0	0	0	3	0	0	0	0	0
773	WD repeat domain phosphoinositide-interacting protein 2 OS=Homo sapiens OX=9606 GN=WIPI2 PE=1 SV=1	Q9Y4P8	WIPI2	49 kDa	0	0	0	0	0	0	0	0	0	0	0	2	0	0	0	2	0	0	0	0	0	0	0	0	0	0	0	0	0	0
774	Queuosine salvage protein OS=Homo sapiens OX=9606 GN=C9orf64 PE=1 SV=1	Q5T6V5	C9orf64	39 kDa	0	0	0	0	0	0	0	0	0	2	0	0	0	2	2	0	0	0	0	0	0	0	0	0	0	0	0	0	0	0
775	WD repeat-containing protein 91 OS=Homo sapiens OX=9606 GN=WDR91 PE=1 SV=2	A4D1P6	WDR91	83 kDa	0	0	0	0	0	0	0	0	0	0	0	0	0	0	0	0	0	0	0	0	0	0	0	0	0	0	0	2	2	3
776	Coagulation factor V OS=Homo sapiens OX=9606 GN=F5 PE=1 SV=4	P12259	F5	252 kDa	0	0	0	0	0	0	0	0	0	0	0	0	0	0	0	3	0	2	0	0	0	0	4	4	0	0	0	0	0	0
777	Importin subunit alpha-7 OS=Homo sapiens OX=9606 GN=KPNA6 PE=1 SV=1	O60684	KPNA6	60 kDa	0	0	0	0	0	0	0	0	0	4	0	0	0	0	0	0	0	0	0	0	0	0	0	0	0	3	5	2	0	2
778	ADP-ribose glycohydrolase ARH3 OS=Homo sapiens OX=9606 GN=ADPRS PE=1 SV=1	Q9NX46	ADPRS	39 kDa	0	0	0	0	0	2	0	0	0	0	0	0	0	0	0	0	0	0	0	0	0	0	0	0	3	3	0	0	0	0
779	Hexokinase-1 OS=Homo sapiens OX=9606 GN=HK1 PE=1 SV=3	P19367	HK1	102 kDa	0	0	0	0	0	0	0	0	0	0	0	0	0	0	0	2	0	0	0	3	0	0	2	0	0	0	0	0	0	0
780	Dual specificity mitogen-activated protein kinase kinase 3 OS=Homo sapiens OX=9606 GN=MAP2K3 PE=1 SV=2	P46734	MAP2K3	39 kDa	0	0	0	0	0	0	0	0	0	0	0	0	2	0	0	0	0	0	0	0	0	0	0	0	3	3	2	2	2	3
781	Heterogeneous nuclear ribonucleoproteins C1/C2 OS=Homo sapiens OX=9606 GN=HNRNPC PE=1 SV=4	P07910	HNRNPC	34 kDa	0	0	0	0	0	0	0	0	0	0	0	0	0	0	0	3	0	0	0	0	0	5	2	2	0	0	0	0	0	0
782	2'-deoxynucleoside 5'-phosphate N-hydrolase 1 OS=Homo sapiens OX=9606 GN=DNPH1 PE=1 SV=1	O43598	DNPH1	19 kDa	0	0	0	0	0	0	0	0	0	0	0	0	0	2	2	0	0	0	0	0	0	0	0	0	0	0	0	0	0	0
783	Sedoheptulokinase OS=Homo sapiens OX=9606 GN=SHPK PE=1 SV=3	Q9UHJ6	SHPK	51 kDa	0	0	0	0	0	0	0	0	0	3	0	3	0	0	0	0	0	0	0	2	0	0	0	0	0	3	3	0	0	2
784	Guanine nucleotide-binding protein G(s) subunit alpha isoforms XLas OS=Homo sapiens OX=9606 GN=GNAS PE=1 SV=2	Q5JWF2	GNAS	111 kDa	0	0	0	2	2	2	0	0	0	0	2	3	0	0	0	0	0	0	0	0	0	0	0	0	0	0	0	0	0	0
785	EH domain-binding protein 1-like protein 1 OS=Homo sapiens OX=9606 GN=EHBP1L1 PE=1 SV=2	Q8N3D4	EHBP1L1	162 kDa	0	0	0	0	0	0	0	0	0	0	5	0	0	0	0	0	0	0	0	0	0	0	0	0	0	0	0	0	0	0
786	Phosphatidate phosphatase LPIN2 OS=Homo sapiens OX=9606 GN=LPIN2 PE=1 SV=1	Q92539	LPIN2	99 kDa	0	0	0	0	0	0	0	0	0	0	0	0	0	0	0	0	0	0	0	0	0	0	0	0	3	5	0	3	3	3
787	Non-secretory ribonuclease OS=Homo sapiens OX=9606 GN=RNASE2 PE=1 SV=2	P10153	RNASE2	18 kDa	0	0	0	0	0	0	0	0	0	0	0	0	0	0	0	0	0	0	0	0	0	0	0	0	2	3	3	2	7	0
788	Protein disulfide-isomerase A6 OS=Homo sapiens OX=9606 GN=PDIA6 PE=1 SV=1	Q15084	PDIA6	48 kDa	0	0	0	0	0	0	0	2	4	0	0	0	0	0	0	3	3	5	0	0	0	2	0	2	0	0	0	0	0	0
789	DnaJ homolog subfamily A member 4 OS=Homo sapiens OX=9606 GN=DNAJA4 PE=1 SV=1	Q8WW22	DNAJA4	45 kDa	0	0	0	0	0	0	0	0	0	0	0	0	0	0	0	0	0	0	3	0	0	0	0	0	0	0	0	0	0	2
790	LIM and senescent cell antigen-like-containing domain protein 1 OS=Homo sapiens OX=9606 GN=LIMS1 PE=1 SV=4	P48059	LIMS1	37 kDa	0	0	0	0	0	0	0	0	0	0	0	0	0	0	0	3	4	3	0	0	0	4	3	4	0	0	0	0	0	0
791	Complement C2 OS=Homo sapiens OX=9606 GN=C2 PE=1 SV=2	P06681	C2	83 kDa	0	0	0	0	0	0	0	0	0	0	0	0	0	0	0	0	0	0	0	0	0	0	0	0	4	0	4	4	7	4
792	Thyroxine-binding globulin OS=Homo sapiens OX=9606 GN=SERPINA7 PE=1 SV=2	P05543	SERPINA7	46 kDa	0	0	0	0	0	0	0	0	0	0	0	0	0	0	0	0	0	0	0	0	0	0	0	0	6	5	5	0	3	6
793	Isoamyl acetate-hydrolyzing esterase 1 homolog OS=Homo sapiens OX=9606 GN=IAH1 PE=1 SV=1	Q2TAA2	IAH1	28 kDa	0	0	0	0	0	0	0	0	0	0	0	0	0	0	0	0	0	2	0	3	2	2	0	0	0	0	0	0	0	0
794	Aldo-keto reductase family 1 member C3 OS=Homo sapiens OX=9606 GN=AKR1C3 PE=1 SV=4	P42330	AKR1C3	37 kDa	0	0	0	0	0	0	0	0	0	0	0	0	2	0	2	0	2	0	0	0	0	0	2	0	0	0	0	2	2	0
795	High mobility group protein B2 OS=Homo sapiens OX=9606 GN=HMGB2 PE=1 SV=2	P26583	HMGB2	24 kDa	0	0	0	0	0	0	0	0	0	0	0	0	0	0	0	0	5	0	0	0	0	0	0	0	0	0	0	0	3	0
796	EH domain-containing protein 1 OS=Homo sapiens OX=9606 GN=EHD1 PE=1 SV=2	Q9H4M9	EHD1	61 kDa	0	0	0	0	0	0	0	0	5	0	0	0	0	0	0	0	2	0	0	0	0	0	0	0	0	0	0	0	0	0
797	Hornerin OS=Homo sapiens OX=9606 GN=HRNR PE=1 SV=2	Q86YZ3	HRNR	282 kDa	0	0	0	0	0	0	0	0	0	0	0	0	0	0	0	0	5	2	0	0	0	0	0	0	3	0	3	0	0	2
798	Proteoglycan 3 OS=Homo sapiens OX=9606 GN=PRG3 PE=1 SV=2	Q9Y2Y8	PRG3	25 kDa	0	0	0	0	0	0	0	0	0	0	0	0	0	0	0	0	0	0	0	0	0	0	0	0	2	3	3	3	3	0
799	Lysozyme C OS=Homo sapiens OX=9606 GN=LYZ PE=1 SV=1	P61626	LYZ	17 kDa	0	0	0	0	0	0	0	0	0	0	0	0	0	0	0	0	0	0	0	0	0	0	3	0	0	0	0	0	0	0
800	Proteasome assembly chaperone 3 OS=Homo sapiens OX=9606 GN=PSMG3 PE=1 SV=1	Q9BT73	PSMG3	13 kDa	0	0	0	0	0	0	0	0	0	0	0	0	0	0	0	0	0	0	0	0	0	0	0	0	0	3	2	0	2	0
801	2',5'-phosphodiesterase 12 OS=Homo sapiens OX=9606 GN=PDE12 PE=1 SV=2	Q6L8Q7	PDE12	67 kDa	0	0	0	0	0	0	0	0	0	0	0	0	0	2	5	0	0	0	0	0	3	0	0	0	0	0	0	2	0	0
802	Desmoglein-1 OS=Homo sapiens OX=9606 GN=DSG1 PE=1 SV=2	Q02413	DSG1	114 kDa	0	0	0	0	0	0	0	0	0	0	0	0	0	0	0	4	6	4	0	0	0	0	0	0	0	0	0	0	0	0
803	Attractin OS=Homo sapiens OX=9606 GN=ATRN PE=1 SV=2	O75882	ATRN	159 kDa	0	0	0	0	0	0	0	0	0	0	0	0	0	0	0	0	0	0	0	0	0	0	0	0	0	0	0	2	0	0
804	Galectin-1 OS=Homo sapiens OX=9606 GN=LGALS1 PE=1 SV=2	P09382	LGALS1	15 kDa	0	0	0	0	0	0	0	0	0	0	0	0	0	0	0	0	0	0	0	0	0	3	2	3	0	0	0	0	0	0
805	Cytosolic 5'-nucleotidase 3A OS=Homo sapiens OX=9606 GN=NT5C3A PE=1 SV=3	Q9H0P0	NT5C3A	38 kDa	0	0	0	0	0	0	0	0	0	0	0	0	0	0	0	0	0	0	0	0	0	0	0	0	0	2	0	0	2	0
806	Nuclear receptor 2C2-associated protein OS=Homo sapiens OX=9606 GN=NR2C2AP PE=1 SV=1	Q86WQ0	NR2C2AP	16 kDa	0	0	0	0	0	0	0	0	0	0	0	4	0	0	0	0	0	0	0	0	0	0	0	0	0	0	0	0	0	0
807	Leucine-rich alpha-2-glycoprotein OS=Homo sapiens OX=9606 GN=LRG1 PE=1 SV=2	P02750	LRG1	38 kDa	0	0	0	0	0	0	0	0	0	0	0	0	2	4	4	3	0	0	0	2	0	0	0	0	0	0	0	0	2	0
808	Glia maturation factor gamma OS=Homo sapiens OX=9606 GN=GMFG PE=1 SV=1	O60234	GMFG	17 kDa	0	0	0	0	0	0	0	0	0	0	0	0	0	0	0	0	0	0	0	0	0	0	0	0	0	0	3	0	0	0
809	Dihydropyrimidinase-related protein 2 OS=Homo sapiens OX=9606 GN=DPYSL2 PE=1 SV=1	Q16555	DPYSL2	62 kDa	0	0	0	0	0	0	0	0	3	0	0	0	0	0	0	0	0	0	0	0	0	0	0	0	0	0	3	2	3	0
810	2',3'-cyclic-nucleotide 3'-phosphodiesterase OS=Homo sapiens OX=9606 GN=CNP PE=1 SV=2	P09543	CNP	48 kDa	0	0	0	3	0	0	0	0	0	0	0	0	0	0	0	0	0	0	0	0	0	0	0	0	0	0	0	0	0	0
811	Malignant T-cell-amplified sequence 1 OS=Homo sapiens OX=9606 GN=MCTS1 PE=1 SV=1	Q9ULC4	MCTS1	21 kDa	0	0	0	0	0	0	0	0	0	0	0	0	0	0	0	0	0	0	0	2	0	2	2	3	0	0	2	0	0	0
812	Peptidoglycan recognition protein 1 OS=Homo sapiens OX=9606 GN=PGLYRP1 PE=1 SV=1	O75594	PGLYRP1	22 kDa	0	0	0	0	0	0	0	0	0	0	0	0	0	0	0	0	0	0	0	0	0	4	0	6	0	0	0	0	0	0
813	Glia maturation factor beta OS=Homo sapiens OX=9606 GN=GMFB PE=1 SV=2	P60983	GMFB	17 kDa	0	0	0	0	0	0	0	0	0	0	0	0	0	0	0	0	0	0	0	0	0	0	0	0	0	0	2	0	0	0
814	Heterogeneous nuclear ribonucleoprotein Q OS=Homo sapiens OX=9606 GN=SYNCRIP PE=1 SV=2	O60506	SYNCRIP	70 kDa	0	0	0	0	0	0	0	0	0	0	0	0	0	0	0	0	3	0	0	0	0	0	0	0	0	0	0	0	0	0
815	DnaJ homolog subfamily B member 1 OS=Homo sapiens OX=9606 GN=DNAJB1 PE=1 SV=4	P25685	DNAJB1	38 kDa	0	0	0	0	0	0	0	0	0	0	0	0	0	0	0	0	0	0	0	0	0	0	0	0	6	3	0	0	5	2
816	Myotrophin OS=Homo sapiens OX=9606 GN=MTPN PE=1 SV=2	P58546	MTPN	13 kDa	0	0	0	0	0	0	0	0	0	0	0	0	0	0	0	0	0	0	0	0	0	2	2	0	0	0	0	0	0	0
817	Immunoglobulin heavy variable 1-69D OS=Homo sapiens OX=9606 GN=IGHV1-69D PE=1 SV=1	A0A0B4J2H0	IGHV1-69D	13 kDa	0	0	0	0	0	0	0	0	0	0	0	0	0	0	0	0	0	0	0	0	0	0	0	0	4	3	4	0	0	2
818	Caldesmon OS=Homo sapiens OX=9606 GN=CALD1 PE=1 SV=3	Q05682	CALD1	93 kDa	0	0	0	0	0	0	0	0	0	0	0	0	0	0	0	2	0	3	0	0	0	0	0	2	0	0	0	0	0	0
819	MOB kinase activator 1B OS=Homo sapiens OX=9606 GN=MOB1B PE=1 SV=3	Q7L9L4	MOB1B	25 kDa	0	0	0	0	0	0	0	0	0	0	0	0	2	0	0	0	0	0	0	0	0	0	2	3	0	0	0	0	0	0
820	Hepatocyte growth factor-regulated tyrosine kinase substrate OS=Homo sapiens OX=9606 GN=HGS PE=1 SV=1	O14964	HGS	86 kDa	0	0	0	0	0	0	0	0	0	0	0	0	0	0	0	0	0	0	0	0	0	0	0	0	2	0	3	0	0	3
821	Galectin-10 OS=Homo sapiens OX=9606 GN=CLC PE=1 SV=3	Q05315	CLC	16 kDa	0	0	0	0	0	3	0	0	0	0	0	0	0	0	0	0	0	0	0	0	0	0	0	0	0	0	0	0	0	0
822	Bactericidal permeability-increasing protein OS=Homo sapiens OX=9606 GN=BPI PE=1 SV=4	P17213	BPI	54 kDa	0	0	0	0	0	0	0	0	0	0	0	0	0	0	0	0	3	3	0	0	0	4	0	0	0	0	0	0	0	0
823	Immunoglobulin delta heavy chain OS=Homo sapiens OX=9606 PE=1 SV=1	P0DOX3		56 kDa	0	0	0	0	0	0	0	0	0	0	0	0	0	0	3	0	0	0	0	0	0	0	0	0	0	0	0	0	0	0
824	60S acidic ribosomal protein P0 OS=Homo sapiens OX=9606 GN=RPLP0 PE=1 SV=1	P05388	RPLP0	34 kDa	0	0	0	0	0	0	0	0	0	0	0	0	0	0	0	0	3	0	0	0	0	0	0	3	0	0	0	0	0	0
825	CXXC motif containing zinc binding protein OS=Homo sapiens OX=9606 GN=CZIB PE=1 SV=1	Q9NWV4	CZIB	18 kDa	0	0	0	0	0	0	0	0	0	0	0	0	0	0	0	0	0	0	0	0	0	0	0	0	2	0	2	0	0	0
826	DnaJ homolog subfamily C member 9 OS=Homo sapiens OX=9606 GN=DNAJC9 PE=1 SV=1	Q8WXX5	DNAJC9	30 kDa	0	0	0	0	0	2	0	0	0	0	0	0	0	0	2	0	0	0	0	0	0	0	0	0	0	0	0	0	0	0
827	BH3-interacting domain death agonist OS=Homo sapiens OX=9606 GN=BID PE=1 SV=1	P55957	BID	22 kDa	2	0	0	0	0	0	0	0	0	0	0	0	0	0	0	0	0	0	0	0	0	0	2	0	0	0	0	0	0	0
828	NHL repeat-containing protein 2 OS=Homo sapiens OX=9606 GN=NHLRC2 PE=1 SV=1	Q8NBF2	NHLRC2	79 kDa	0	0	0	0	0	0	0	0	0	0	0	0	0	0	0	0	0	0	0	0	0	0	0	0	0	0	0	2	0	0
829	Peptidyl-prolyl cis-trans isomerase FKBP3 OS=Homo sapiens OX=9606 GN=FKBP3 PE=1 SV=1	Q00688	FKBP3	25 kDa	0	0	0	0	0	0	0	0	0	0	0	0	0	0	0	0	0	0	0	0	0	2	4	0	0	0	0	0	0	0
830	ATP synthase subunit alpha, mitochondrial OS=Homo sapiens OX=9606 GN=ATP5F1A PE=1 SV=1	P25705	ATP5F1A	60 kDa	0	0	0	0	0	0	0	2	2	0	0	0	0	0	0	3	3	4	0	0	0	2	2	2	0	0	0	0	0	0
831	Apolipoprotein M OS=Homo sapiens OX=9606 GN=APOM PE=1 SV=2	O95445	APOM	21 kDa	0	0	0	0	0	0	0	0	0	0	0	0	0	0	0	0	0	0	0	0	0	0	0	0	0	0	2	2	5	0
832	Plasma serine protease inhibitor OS=Homo sapiens OX=9606 GN=SERPINA5 PE=1 SV=3	P05154	SERPINA5	46 kDa	0	0	0	0	0	0	0	0	0	0	0	0	0	0	0	0	0	0	0	0	0	0	0	0	3	2	5	2	0	2
833	60S acidic ribosomal protein P2 OS=Homo sapiens OX=9606 GN=RPLP2 PE=1 SV=1	P05387	RPLP2	12 kDa	0	0	0	0	0	0	0	0	0	0	0	0	0	0	0	0	0	0	0	0	0	0	0	0	0	3	2	0	0	0
834	Peptidyl-prolyl cis-trans isomerase B OS=Homo sapiens OX=9606 GN=PPIB PE=1 SV=2	P23284	PPIB	24 kDa	0	0	0	0	0	0	0	0	0	0	0	0	0	0	0	0	0	0	0	0	0	0	2	0	0	0	0	0	0	0
835	Tyrosine-protein phosphatase non-receptor type 7 OS=Homo sapiens OX=9606 GN=PTPN7 PE=1 SV=3	P35236	PTPN7	41 kDa	0	0	0	2	0	0	0	0	0	0	0	0	0	0	0	0	0	0	0	0	0	0	0	0	0	0	0	0	0	0
836	Inosine triphosphate pyrophosphatase OS=Homo sapiens OX=9606 GN=ITPA PE=1 SV=2	Q9BY32	ITPA	21 kDa	0	0	0	0	0	0	0	0	0	0	0	0	0	0	0	3	2	2	0	0	0	0	0	0	0	0	0	0	0	0
837	Ubiquitin carboxyl-terminal hydrolase 7 OS=Homo sapiens OX=9606 GN=USP7 PE=1 SV=2	Q93009	USP7	128 kDa	0	0	0	0	0	0	0	0	0	0	0	0	0	0	0	0	0	0	0	0	0	0	0	0	0	3	0	0	2	0
838	Junction plakoglobin OS=Homo sapiens OX=9606 GN=JUP PE=1 SV=3	P14923	JUP	82 kDa	0	0	0	0	0	0	0	0	0	0	0	0	0	0	0	0	6	3	0	0	0	0	0	0	0	0	0	0	0	0
839	UBX domain-containing protein 1 OS=Homo sapiens OX=9606 GN=UBXN1 PE=1 SV=2	Q04323	UBXN1	33 kDa	0	0	0	0	0	0	0	0	0	0	0	0	0	0	0	0	0	0	0	0	0	0	0	0	0	0	0	0	0	2
840	Cytosolic non-specific dipeptidase OS=Homo sapiens OX=9606 GN=CNDP2 PE=1 SV=2	Q96KP4	CNDP2	53 kDa	0	0	0	0	0	0	0	0	0	0	0	0	2	0	0	0	0	0	0	0	0	0	0	0	0	0	0	0	0	0
841	Microtubule-associated protein RP/EB family member 2 OS=Homo sapiens OX=9606 GN=MAPRE2 PE=1 SV=1	Q15555	MAPRE2	37 kDa	0	0	0	0	0	0	0	0	0	0	0	0	0	0	0	0	2	0	0	0	0	0	0	0	0	0	0	0	0	0
842	Ubiquitin-fold modifier 1 OS=Homo sapiens OX=9606 GN=UFM1 PE=1 SV=1	P61960	UFM1	9 kDa	0	0	0	0	0	0	0	0	0	0	0	0	0	0	0	0	0	0	0	0	0	0	0	0	2	0	3	0	2	3
843	Immunoglobulin heavy variable 2-26 OS=Homo sapiens OX=9606 GN=IGHV2-26 PE=3 SV=1	A0A0B4J1V2	IGHV2-26	13 kDa	0	0	0	0	0	0	0	0	0	0	0	0	0	3	0	0	0	0	0	0	0	0	0	0	0	0	0	0	0	0
844	Prostaglandin E synthase 3 OS=Homo sapiens OX=9606 GN=PTGES3 PE=1 SV=1	Q15185	PTGES3	19 kDa	0	0	0	0	0	0	0	0	0	0	0	0	0	0	0	0	0	0	0	0	0	0	0	0	0	0	3	0	0	0
845	Cysteine protease ATG4A OS=Homo sapiens OX=9606 GN=ATG4A PE=1 SV=1	Q8WYN0	ATG4A	45 kDa	0	0	0	0	0	0	0	0	0	0	0	0	0	0	0	0	0	0	0	0	0	0	0	0	0	4	3	0	0	0
846	Ubiquitin carboxyl-terminal hydrolase isozyme L5 OS=Homo sapiens OX=9606 GN=UCHL5 PE=1 SV=3	Q9Y5K5	UCHL5	38 kDa	0	0	0	0	0	0	0	0	0	0	0	0	0	0	0	0	0	0	0	0	0	0	0	0	0	2	0	0	0	2
847	Secernin-2 OS=Homo sapiens OX=9606 GN=SCRN2 PE=1 SV=3	Q96FV2	SCRN2	47 kDa	0	0	0	0	0	0	0	0	0	0	0	0	0	0	2	0	0	0	0	0	0	0	0	0	0	0	0	0	0	0
848	Cathelicidin antimicrobial peptide OS=Homo sapiens OX=9606 GN=CAMP PE=1 SV=1	P49913	CAMP	19 kDa	0	0	0	0	0	0	0	0	0	0	0	0	0	0	0	0	0	0	0	0	0	0	3	0	0	0	0	0	0	0
849	Gamma-adducin OS=Homo sapiens OX=9606 GN=ADD3 PE=1 SV=1	Q9UEY8	ADD3	79 kDa	0	0	0	0	0	0	0	0	0	0	0	0	0	0	0	0	0	0	0	0	0	0	0	0	4	0	0	0	0	0
850	Vacuolar protein sorting-associated protein 4A OS=Homo sapiens OX=9606 GN=VPS4A PE=1 SV=1	Q9UN37	VPS4A	49 kDa	0	0	0	0	0	0	0	0	0	0	0	0	0	0	0	0	0	0	0	0	0	0	0	0	0	2	0	0	0	0
851	Threonine--tRNA ligase 1, cytoplasmic OS=Homo sapiens OX=9606 GN=TARS1 PE=1 SV=3	P26639	TARS1	83 kDa	0	0	0	0	0	0	0	0	0	0	0	0	0	0	0	0	0	0	0	0	0	0	0	2	0	0	0	0	0	0
852	Guanosine-3',5'-bis(diphosphate) 3'-pyrophosphohydrolase MESH1 OS=Homo sapiens OX=9606 GN=HDDC3 PE=1 SV=3	Q8N4P3	HDDC3	20 kDa	0	0	0	0	0	0	0	0	0	0	0	0	3	0	0	0	0	0	0	0	0	0	0	0	0	0	0	0	0	0
853	Immunoglobulin heavy variable 1-2 OS=Homo sapiens OX=9606 GN=IGHV1-2 PE=1 SV=2	P23083	IGHV1-2	13 kDa	0	0	0	0	0	0	0	0	0	0	0	0	0	0	0	0	0	0	0	0	0	0	0	0	0	0	0	3	0	2
854	Serine/threonine-protein phosphatase 2A 56 kDa regulatory subunit delta isoform OS=Homo sapiens OX=9606 GN=PPP2R5D PE=1 SV=1	Q14738	PPP2R5D	70 kDa	0	0	0	0	0	0	0	0	0	0	0	0	0	0	0	0	0	0	0	0	0	0	0	0	0	0	2	0	3	0
855	Apolipoprotein A-II OS=Homo sapiens OX=9606 GN=APOA2 PE=1 SV=1	P02652	APOA2	11 kDa	0	0	0	0	0	0	0	0	0	0	0	0	0	0	0	0	0	0	0	0	0	0	3	0	0	0	0	0	0	0
856	DDB1- and CUL4-associated factor 11 OS=Homo sapiens OX=9606 GN=DCAF11 PE=1 SV=1	Q8TEB1	DCAF11	62 kDa	0	0	0	0	0	0	0	0	0	0	0	0	0	0	0	0	0	0	0	0	0	0	0	0	0	3	3	3	0	0
857	Basal cell adhesion molecule OS=Homo sapiens OX=9606 GN=BCAM PE=1 SV=2	P50895	BCAM	67 kDa	0	0	0	0	0	0	0	0	0	0	2	4	0	0	0	0	0	0	0	0	0	0	0	0	0	0	0	0	0	0
858	Eukaryotic translation initiation factor 5 OS=Homo sapiens OX=9606 GN=EIF5 PE=1 SV=2	P55010	EIF5	49 kDa	0	0	0	0	0	0	0	0	0	0	2	0	0	0	0	0	0	0	0	0	0	0	0	0	0	0	0	0	0	0
859	Coronin-7 OS=Homo sapiens OX=9606 GN=CORO7 PE=1 SV=2	P57737	CORO7	101 kDa	0	0	0	0	0	0	0	0	0	0	0	0	0	0	0	0	0	0	0	0	0	0	2	0	2	0	0	0	0	0
860	Mitochondrial enolase superfamily member 1 OS=Homo sapiens OX=9606 GN=ENOSF1 PE=1 SV=1	Q7L5Y1	ENOSF1	50 kDa	0	0	0	0	0	0	0	0	0	0	0	0	0	0	0	0	0	0	0	0	0	0	0	0	2	0	0	0	0	0
861	Sex hormone-binding globulin OS=Homo sapiens OX=9606 GN=SHBG PE=1 SV=2	P04278	SHBG	44 kDa	0	0	0	0	0	0	0	0	0	0	0	0	0	0	0	0	0	0	0	0	0	0	0	0	0	0	0	0	2	0
862	Peroxisomal multifunctional enzyme type 2 OS=Homo sapiens OX=9606 GN=HSD17B4 PE=1 SV=3	P51659	HSD17B4	80 kDa	0	0	0	0	0	0	0	0	0	0	0	0	0	0	0	3	3	0	0	0	0	0	0	0	0	0	0	0	0	0
863	Proto-oncogene tyrosine-protein kinase Src OS=Homo sapiens OX=9606 GN=SRC PE=1 SV=3	P12931	SRC	60 kDa	0	0	0	0	0	0	0	0	0	0	0	0	0	0	0	0	0	0	0	0	0	2	0	0	0	0	0	0	0	0
864	Ribosyldihydronicotinamide dehydrogenase [quinone] OS=Homo sapiens OX=9606 GN=NQO2 PE=1 SV=5	P16083	NQO2	26 kDa	0	0	0	0	0	0	0	0	0	0	0	0	0	0	0	0	0	0	0	0	0	0	0	0	0	3	0	0	0	0
865	Desmocollin-1 OS=Homo sapiens OX=9606 GN=DSC1 PE=1 SV=2	Q08554	DSC1	100 kDa	0	0	0	0	0	0	0	0	0	0	0	0	0	0	0	3	0	4	0	0	0	0	0	0	0	0	0	0	0	0
866	Histone-lysine N-methyltransferase SETD2 OS=Homo sapiens OX=9606 GN=SETD2 PE=1 SV=3	Q9BYW2	SETD2	288 kDa	0	0	0	0	0	0	0	0	0	0	0	0	0	0	0	0	0	0	0	0	2	0	0	0	0	0	0	0	0	0
867	Synaptosomal-associated protein 23 OS=Homo sapiens OX=9606 GN=SNAP23 PE=1 SV=1	O00161	SNAP23	23 kDa	0	0	0	0	0	0	0	0	0	0	0	0	0	0	0	0	3	0	0	0	0	0	0	0	0	0	0	0	0	0
868	Protein disulfide-isomerase A4 OS=Homo sapiens OX=9606 GN=PDIA4 PE=1 SV=2	P13667	PDIA4	73 kDa	0	0	0	0	0	0	0	0	0	0	0	0	0	0	0	3	0	0	0	0	0	0	0	0	0	0	0	0	0	0
869	Glutathione S-transferase Mu 3 OS=Homo sapiens OX=9606 GN=GSTM3 PE=1 SV=3	P21266	GSTM3	27 kDa	0	0	0	0	0	0	0	0	0	0	0	0	0	0	0	0	0	0	0	0	0	0	0	0	3	0	2	0	0	0
870	Secernin-1 OS=Homo sapiens OX=9606 GN=SCRN1 PE=1 SV=2	Q12765	SCRN1	46 kDa	0	0	0	0	0	0	0	0	0	0	2	0	0	0	0	0	0	0	0	0	0	0	0	0	0	0	0	0	0	0
871	Complement C1r subcomponent-like protein OS=Homo sapiens OX=9606 GN=C1RL PE=1 SV=2	Q9NZP8	C1RL	53 kDa	0	0	0	0	0	0	0	0	0	0	0	0	0	0	0	0	0	0	0	0	0	0	0	0	0	0	0	2	0	0
872	Calmodulin-1 OS=Homo sapiens OX=9606 GN=CALM1 PE=1 SV=1	P0DP23 (+2)	CALM1	17 kDa	0	0	0	0	0	0	0	0	0	2	0	2	0	0	0	0	0	0	0	0	0	0	0	0	0	0	0	0	0	0
873	Twinfilin-2 OS=Homo sapiens OX=9606 GN=TWF2 PE=1 SV=2	Q6IBS0	TWF2	40 kDa	0	0	0	0	0	0	0	0	0	0	0	0	0	0	0	0	0	0	0	0	0	0	0	2	0	0	0	0	0	0
874	Peptidyl-prolyl cis-trans isomerase H OS=Homo sapiens OX=9606 GN=PPIH PE=1 SV=1	O43447	PPIH	19 kDa	0	0	0	0	0	0	0	0	0	0	0	0	0	0	0	0	0	0	0	0	0	0	0	0	3	0	0	0	0	0
875	Activator of 90 kDa heat shock protein ATPase homolog 1 OS=Homo sapiens OX=9606 GN=AHSA1 PE=1 SV=1	O95433	AHSA1	38 kDa	0	0	0	0	0	0	0	0	0	0	0	0	0	0	0	0	0	0	0	0	0	0	0	0	0	0	0	0	0	2
876	Prohibitin-2 OS=Homo sapiens OX=9606 GN=PHB2 PE=1 SV=2	Q99623	PHB2	33 kDa	0	0	0	0	0	0	0	0	0	0	0	0	0	0	0	0	0	0	0	0	0	0	0	2	0	0	0	0	0	0
877	Retinol dehydrogenase 11 OS=Homo sapiens OX=9606 GN=RDH11 PE=1 SV=2	Q8TC12	RDH11	35 kDa	0	0	0	0	0	0	0	0	0	0	0	0	0	0	0	0	2	0	0	0	0	0	0	0	0	0	0	0	0	0
878	ATP-binding cassette sub-family C member 4 OS=Homo sapiens OX=9606 GN=ABCC4 PE=1 SV=3	O15439	ABCC4	150 kDa	0	0	0	0	0	0	0	0	0	0	0	0	0	2	0	0	0	0	0	0	0	0	0	0	0	0	0	0	0	0
END OF FILE

## Sheet: Metals
			1	2	7	8	13	16	19	22	25	28
N.	Element	Concentration	Control	Control	Carrier	Carrier	LN	LN	LN	LN	LN	LN
1	Sodium	ppb	660821	548734	438734	323045	904827	494253	649379	543723	946821	933015
2	Magnesium	ppb	63144.6	54257.8	53704.7	51587.1	52706.1	47366.9	49074.7	47394.8	45232.9	40863.3
3	Potassium	ppb	4.55042e+06	3.78555e+06	3.54561e+06	3.52565e+06	3.3213e+06	3.01991e+06	3.33391e+06	3.20855e+06	3.15404e+06	2.82289e+06
4	Calcium	ppb	21321.7	20450.1	25167.8	8772.12	34735.5	18968.3	18862.7	20546.8	42664.3	75072.3
5	Iron	ppb	1.16464e+06	1.00836e+06	865910	1.00265e+06	727342	717117	823204	742628	780510	753469
6	Copper	ppb	784.585	688.814	528.104	467.527	706.377	443.845	579.505	573.285	712.257	706.248
7	Zinc	ppb	10785.9	9336.91	8805.33	9264.55	7523.24	7541.19	6119.18	5840.12	4109.26	4080.7
8	Selenium	ppb	203.504	192.23	238.888	228.863	131.919	118.355	120.957	115.849	170.555	168.932
